# Supplementary material for: Analysis of Allergen Components and Identification of Bioactivity of HSP70 in Pollen of Populus Deltoides
Source: Research Square preprint supplement (doi:10.21203/rs.3.rs-541522/v1), 2021-05-26
Supplement: Supplementary file 1 [file c78b56c8e76ed29c038b8cd2.xlsx]

## Sheet: ident
GO Terms Level 1	GO Terms Description	GO Terms Level	GO Terms ID	Mapping	Background	All Mapping	All Background	Fold Enrichment	Fisher' exact test P value	-log10(p value)	Related Protein
Cellular Component	cytoplasm	6	GO:0005737	998	7165	1631	25432	2.17	1.58753e-182	181.8	A9PBI3 B9GWN0 A9PE73 B9MXR8 B9I6V1 A0A2K1Z6C5 B9GP93 B9GX38 A0A2K1ZZZ2 B9HLY0 A0A2K1YX28 B9H3C6 U5G5S8 A9P8R3 B9I9L2 A0A2K1ZGR1 B9N0N0 B9HJ33 U5GGG4 B9I1A1 B9N6N2 U5GL25 B9INR8 A9PFL3 A9PBS4 B9MXE8 B9HFM8 B9H5C2 B9HIP9 B9I8I7 B9N680 B9IE82 A0A2K1XL83 U5GGE4 A9PBU4 B9H7A3 U5GN78 B9HWR3 A0A2K1Z7R4 A0A2K1R4Q6 B9GNW0 B9H0V6 B9IGG6 B9H917 U5FIP4 B9HD67 B9HJ44 B9MZF5 A9PBL6 A0A2K2BCI4 B9I906 B9GEM9 U7E…
	cytoplasmic part	7	GO:0044444	752	4960	1631	25432	2.36	1.6359e-79	78.79	A9PBI3 B9GWN0 A9PE73 B9I6V1 A0A2K1Z6C5 B9GP93 B9HLY0 A0A2K1YX28 B9I9L2 B9HJ33 U5GGG4 B9I1A1 B9N6N2 U5GL25 B9INR8 A9PBS4 B9MXE8 B9HFM8 B9HIP9 B9I8I7 B9N680 B9IE82 A0A2K1XL83 U5GGE4 A9PBU4 B9H7A3 U5GN78 B9HWR3 B9GNW0 B9H0V6 B9IGG6 B9H917 U5FIP4 B9HD67 B9MZF5 A9PBL6 A0A2K2BCI4 B9I906 B9GEM9 U7E0X6 B9IAR5 B9IG32 U5FPD9 B9H602 U5GFL8 U5G6D2 A9PGV8 A0A2K1ZEB4 B9I0B5 A9P9I3 A0A2K1XLI8 U5FHM4 A9PIG1 B9N0…
	cytosol	8	GO:0005829	191	895	1631	25432	3.33	4.6085e-52	51.34	B9GXY0 B9HG84 B9GQP4 B9IIV1 B9HG08 B9H7W2 A9P8E8 U5GGG4 B9N6N2 A9P8K6 A9PI77 B9MUD1 B9HIP9 A4GYU8 B9I2I4 A9PGT3 B9IE82 B9I2N0 B9GMI8 B9GFJ3 B9N135 B9HWR3 A9PGB1 A9PIA2 B9IGG6 B9H401 U5FIP4 B9HD67 A9PDZ7 A9PBL6 U5G9M2 A9PCX2 A9PBW0 B9N4I9 U5FPD9 A9P9G9 A9P9A0 B9H602 B9HWR9 U5G6D2 A9PI71 A9PGV8 A9PC05 A9PA39 B9IBY8 B9N049 B9N4C2 B9HHZ9 B9GP45 A9PBF7 B9N0S4 A9PCZ0 U5GAZ4 A9PA83 A9PI53 B9IHJ0 U5G5W8 …
	ribonucleoprotein complex	3	GO:1990904	244	1408	1631	25432	2.7	2.5608e-44	43.59	A9PBI3 A9PC09 A9PCW9 B9GQP4 A0A2K2BTN7 B9GPZ0 B9IIV1 B9H7W2 A9P8E8 B9HJ33 B9MU33 B9I1A1 A0A2K2AXF7 A9PDL5 A9P8K6 A9PI77 B9HSR0 A9PBS4 B9III1 A4GYT5 B9MUD1 A4GYU8 A0A2K1YXW6 A9PC19 A9P978 B9HCM4 B9HNI9 A0A2K1XL83 B9H7A3 U5FI38 A0A2K1ZIR2 A0A2K2BZR0 A9P7U1 B9IQM6 B9IGG6 B9H917 B9HD67 A9PBL6 A9PCX2 A9PBW0 A9P9G9 A9P9A0 U5GFL8 A0A2K2BIM1 A9PC05 B9IBY8 B9N049 A4GYU7 A0A2K2A680 A0A2K2A5L8 A9PB01 B9HEV8…
	intracellular ribonucleoprotein complex	6	GO:0030529	244	1408	1631	25432	2.7	2.5608e-44	43.59	A9PBI3 A9PC09 A9PCW9 B9GQP4 A0A2K2BTN7 B9GPZ0 B9IIV1 B9H7W2 A9P8E8 B9HJ33 B9MU33 B9I1A1 A0A2K2AXF7 A9PDL5 A9P8K6 A9PI77 B9HSR0 A9PBS4 B9III1 A4GYT5 B9MUD1 A4GYU8 A0A2K1YXW6 A9PC19 A9P978 B9HCM4 B9HNI9 A0A2K1XL83 B9H7A3 U5FI38 A0A2K1ZIR2 A0A2K2BZR0 A9P7U1 B9IQM6 B9IGG6 B9H917 B9HD67 A9PBL6 A9PCX2 A9PBW0 A9P9G9 A9P9A0 U5GFL8 A0A2K2BIM1 A9PC05 B9IBY8 B9N049 A4GYU7 A0A2K2A680 A0A2K2A5L8 A9PB01 B9HEV8…
	macromolecular complex	2	GO:0032991	564	4473	1631	25432	1.97	1.1916e-40	39.92	A9PBI3 B9GWN0 A0A2K1Z6C5 B9GP93 A9PCZ9 A0A2K2BQP8 A9PD87 B9HJ33 B9MU33 U5GGG4 B9I1A1 A9PBS4 B9N680 B9IE82 A0A2K1XL83 A9PBU4 B9H7A3 U5FI38 B9IQM6 B9IGG6 B9H917 B9HI19 B9HD67 B9MZF5 A9PBL6 A0A2K2BCI4 B9GEM9 B9IAR5 U5GFL8 B9HXP3 B9HJD9 A0A2K1XLI8 A9PCZ0 A9PE34 A0A2K2A8V5 A9PA83 B9N8K9 B9HVP6 U5G2L6 B9I3F7 A9PHY3 A9P9U4 A9PCN3 U5G4E1 U5G2B5 A9PHP7 A0A2K1Y573 B9HFT3 B9IIC4 B9H7R3 B9GRP4 A0A2K2C7C7 B9G…
	ribosomal subunit	9	GO:0044391	104	428	1631	25432	3.79	4.32e-37	36.36	A9PGV4 A9PCW9 B9HK59 B9GQP4 A4GYP7 B9IIV1 A9PGL4 A9PFA8 B9H7W2 A9P8E8 B9HJ33 B9I1A1 A0A2K2AXF7 B9N6A1 A9P8K6 A9PI77 A0A2K1YCF4 B9III1 A4GYT5 A9PAL5 B9MUD1 A0A2K2BNS4 A4GYU8 A9PC56 A9PGG5 A9PEI9 B9H7A3 B9HU05 A9PEJ6 A4GYR2 A9PCQ5 B9IGG6 B9HD67 B9IIY9 A9PB00 A9PBL6 A9PCX2 A9PBW0 A9PHS9 B9IN50 A9P9G9 A9P9A0 A9PDZ4 A4GYU9 A9PC05 B9IBY8 A4GYU7 A9P8D7 A9PB01 A0A2K1XLI8 A9PBF7 A9PCZ0 A0A2K2B2X9 U5GAZ4 B…
	cytosolic part	9	GO:0044445	89	364	1631	25432	3.81	1.5773e-32	31.8	A9PG47 B9HK59 B9GQP4 B9IIV1 A9PGL4 A9PFA8 U5GGG4 B9N6A1 A9P8K6 A9PI77 A9PAL5 B9MUD1 A4GYU8 B9I2I4 B9INY9 B9H416 A9PC56 B9IE82 A9PGG5 A9PEI9 B9I2N0 B9HU05 A9PEJ6 A9PCQ5 B9IGG6 B9HD67 B9IIY9 A9PBL6 A9PCX2 A9PBW0 A9PHS9 B9N4I9 B9IN50 A9P9G9 A9P9A0 A9PDZ4 A4GYU9 A9PC05 B9IBY8 A9P8D7 A9PBF7 A9PCZ0 B9GR92 U5GAZ4 B9IHJ0 B9I801 B9I1L9 U5G5W8 U5FYH8 B9IKK0 A9P8L6 A9PHY3 A9P9U4 A9PCH3 A9P8I6 B9GJ65 B9IBD9 …
Molecular Function	structural molecule activity	2	GO:0005198	202	993	3023	49028	3.3	6.4475e-57	56.19	A0A2K1Z6C5 A9PCW9 B9GQP4 A0A2K2BTN7 B9IIV1 U5FV61 B9H7W2 A9P8E8 B9HJ33 B9IPR1 A0A2K2C4L7 B9I1A1 A0A2K2AXF7 A9PDL5 A9P8K6 A9PI77 A9PBS4 B9III1 A4GYT5 B9MUD1 A4GYU8 B9N680 A0A2K1YXW6 B9ILF4 A9PC19 A9P978 A0A2K1XL83 B9H7A3 A0A2K1ZIR2 A0A2K2BZR0 B9HJG5 A0A2K2BH83 B9IGG6 B9HD67 A9PBL6 A9PCX2 A9PBW0 A9P9G9 A9P9A0 A0A2K2BIM1 A9PC05 B9IBY8 A4GYU7 A0A2K2A680 A9PB01 B9HXP3 A0A2K1XLI8 A9PBF7 A9PCZ0 A0A2K2B2…
	structural constituent of ribosome	3	GO:0003735	164	825	3023	49028	3.22	2.6737e-45	44.57	A9PCW9 B9GQP4 A0A2K2BTN7 B9IIV1 B9H7W2 A9P8E8 B9HJ33 B9I1A1 A0A2K2AXF7 A9PDL5 A9P8K6 A9PI77 A9PBS4 B9III1 A4GYT5 B9MUD1 A4GYU8 A0A2K1YXW6 A9PC19 A9P978 A0A2K1XL83 B9H7A3 A0A2K1ZIR2 A0A2K2BZR0 B9IGG6 B9HD67 A9PBL6 A9PCX2 A9PBW0 A9P9G9 A9P9A0 A0A2K2BIM1 A9PC05 B9IBY8 A4GYU7 A0A2K2A680 A9PB01 A0A2K1XLI8 A9PBF7 A9PCZ0 A0A2K2B2X9 A0A2K2BKH7 U5GAZ4 B9I3F7 A0A2K1XKK7 A0A2K2BUM7 A9P9U4 A9PB37 B9HAL7 A9PC…
	cofactor binding	3	GO:0048037	194	1425	3023	49028	2.21	6.4948e-25	24.19	U5GFG5 A0A2K1XP80 B9IEJ1 A9PA30 B9MXR8 B9I3D4 B9GUD2 B9IFG3 A9P7V5 A9PI59 A0A2K2AZ03 A9PEQ6 A0A2K2A507 B9IJK8 A0A2K1ZGR1 B9H341 B9HS53 B9HFM8 A0A2K1Z2P1 A0A2K1Z9C0 A9PHH1 B9N1A4 U5FUW7 A0A2K1XEE7 B9MXP7 B9GFJ3 B9GHD7 B9N135 A0A2K2BZE1 B9HDL9 U5FXK8 B9GN69 A0A2K1YT32 A9PIA2 B9GNW0 B9GI50 B9GSN8 B9GXM5 A0A2K1R708 U5GAC2 A9PET3 B9I1W2 A0A2K2BT36 U5GDS8 A9PD27 A0A2K1YL18 U5FPD9 A9PEH3 B9GYD6 B9HYS8 B…
	translation elongation factor activity	7	GO:0003746	26	70	3023	49028	6.02	6.9078e-19	18.16	A9PE52 B9GVF4 A0A2K2BMF5 B9GVR2 B9GW65 B9I3Q0 A9PBD0 B9GKN8 A0A2K2AZJ7 A9PH67 A9PI18 B9H639 B9ILQ4 A0A2K1XXC7 A9PG38 A9PB16 B9GEM9 A0A2K1Z1B1 A0A2K1WXX1 A9PBH3 B9IQD1 B9IA13 A9PD73 U5G560 B9HLP2 B9HAD7
	aminoacyl-tRNA ligase activity	6	GO:0004812	46	194	3023	49028	3.85	1.568e-18	17.8	A0A2K1YSY7 A0A2K1X2L6 B9I665 A0A2K2A3G6 A0A2K2B7U1 B9N401 A0A2K1YMB1 B9N5I4 A0A2K1ZLV0 A0A2K1XVE7 B9MWE6 B9N5I6 A0A2K1Z9Q9 B9H603 A9PAK1 B9HJR1 A0A2K2AS12 B9GUZ6 B9H981 B9HN33 B9HPM4 B9HH41 A0A2K1Z7R4 B9HH75 B9N0F9 U5GAD6 B9HJ44 U5FGZ5 A0A2K1Z6E9 B9IQ90 B9I906 B9H0R2 A0A2K1XWU6 B9HVE4 A0A2K1R8Z0 B9H602 A0A2K2BAY8 B9GMU1 A9PFZ9 B9GZ19 B9HTK5 B9GSG1 B9N0S4 B9HBL6 B9ILW9 U5GEJ6
	ligase activity, forming aminoacyl-tRNA and related compounds	5	GO:0016876	46	194	3023	49028	3.85	1.568e-18	17.8	A0A2K1YSY7 A0A2K1X2L6 B9I665 A0A2K2A3G6 A0A2K2B7U1 B9N401 A0A2K1YMB1 B9N5I4 A0A2K1ZLV0 A0A2K1XVE7 B9MWE6 B9N5I6 A0A2K1Z9Q9 B9H603 A9PAK1 B9HJR1 A0A2K2AS12 B9GUZ6 B9H981 B9HN33 B9HPM4 B9HH41 A0A2K1Z7R4 B9HH75 B9N0F9 U5GAD6 B9HJ44 U5FGZ5 A0A2K1Z6E9 B9IQ90 B9I906 B9H0R2 A0A2K1XWU6 B9HVE4 A0A2K1R8Z0 B9H602 A0A2K2BAY8 B9GMU1 A9PFZ9 B9GZ19 B9HTK5 B9GSG1 B9N0S4 B9HBL6 B9ILW9 U5GEJ6
	ligase activity, forming carbon-oxygen bonds	4	GO:0016875	46	194	3023	49028	3.85	1.568e-18	17.8	A0A2K1YSY7 A0A2K1X2L6 B9I665 A0A2K2A3G6 A0A2K2B7U1 B9N401 A0A2K1YMB1 B9N5I4 A0A2K1ZLV0 A0A2K1XVE7 B9MWE6 B9N5I6 A0A2K1Z9Q9 B9H603 A9PAK1 B9HJR1 A0A2K2AS12 B9GUZ6 B9H981 B9HN33 B9HPM4 B9HH41 A0A2K1Z7R4 B9HH75 B9N0F9 U5GAD6 B9HJ44 U5FGZ5 A0A2K1Z6E9 B9IQ90 B9I906 B9H0R2 A0A2K1XWU6 B9HVE4 A0A2K1R8Z0 B9H602 A0A2K2BAY8 B9GMU1 A9PFZ9 B9GZ19 B9HTK5 B9GSG1 B9N0S4 B9HBL6 B9ILW9 U5GEJ6
	oxidoreductase activity	3	GO:0016491	434	4414	3023	49028	1.59	1.8544e-18	17.73	A9PGX5 A0A2K1Y5S1 A0A2K1ZUV8 B9GWN0 B9IEJ1 A0A2K2APU3 B9MXR8 A9P841 A0A2K1WP07 A0A2K1ZPD6 A0A2K2A507 A9P8D8 A9P8R3 B9I383 B9IJK8 A0A2K1ZGR1 B9HR68 A0A2K1X089 B9N0N0 B9GYJ9 B9HS53 B9MXE8 B9HFM8 A0A2K1Z2P1 B9HM98 B9H5C2 A9PD09 A0A2K2BWC4 B9GWE2 B9MXP7 A0A2K1XAF8 B9H7V4 U5FXK8 U5FES1 A9PG24 A0A2K1ZF68 A0A2K1X188 A0A2K1R708 U5FIP4 A0A2K2AW57 U5GAC2 B9I1W2 B9IBD3 A0A2K2AXK4 A9PC26 B9H1Y6 A4GYR0 A0A2K1…
Biological Process	organonitrogen compound biosynthetic process	5	GO:1901566	470	2507	2536	36890	2.73	5.5932e-82	81.25	B9HJS6 B9GWN0 A0A2K2APU3 A0A2K2CCU4 B9I3M0 A0A2K1ZZZ2 A0A2K2BMF5 A0A2K1WPR3 B9IFG3 A0A2K2A3G6 B9HHA8 A0A2K2BTN7 B9IIV1 A0A2K1XXC7 A9PD87 A0A2K1ZGR1 A4GYR7 A0A2K1Z3Q5 A0A2K1Z8A2 A9PB16 A0A2K1Z5D7 A9P8E8 B9HJ33 B9I1A1 A0A2K2AXF7 B9I0B9 U5GL25 A9PDL5 B9HDC5 A4GYP3 A9PBS4 B9HS53 B9III1 A0A2K2BY33 A0A2K1XUJ1 A0A2K2AS12 B9GUZ6 A4GYU8 A0A2K1XL83 A9PBU4 B9H7A3 B9I8Q3 A0A2K2BZR0 B9HWR3 A0A2K1Z7R4 B9GXM5 B…
	translation	8	GO:0006412	279	1334	2536	36890	3.04	3.1719e-64	63.5	A0A2K2CCU4 A0A2K2BMF5 A0A2K2A3G6 A0A2K2BTN7 B9IIV1 A0A2K1XXC7 A9PB16 A9P8E8 B9HJ33 B9I1A1 A0A2K2AXF7 A9PDL5 B9HDC5 A9PBS4 B9III1 A0A2K2AS12 B9GUZ6 A4GYU8 A0A2K1XL83 B9H7A3 A0A2K2BZR0 A0A2K1Z7R4 B9IGG6 B9H917 B9HD67 B9HJ44 A9PBL6 B9I906 B9GEM9 A9P9G9 B9H602 U5GFL8 A4GYU7 A0A2K1XLI8 B9N0S4 A9PCZ0 A0A2K2B2X9 A0A2K2A8V5 B9N8K9 B9HVP6 B9I3F7 A0A2K2B7U1 A9P9U4 B9INH0 A9PCN3 A4GYU4 U5G4E1 A9PD73 A9PHP7 …
	peptide biosynthetic process	7	GO:0043043	281	1353	2536	36890	3.02	7.7465e-64	63.11	A0A2K2CCU4 A0A2K2BMF5 A0A2K2A3G6 A0A2K2BTN7 B9IIV1 A0A2K1XXC7 A9PB16 A9P8E8 B9HJ33 B9I1A1 A0A2K2AXF7 A9PDL5 B9HDC5 A9PBS4 B9III1 A0A2K2AS12 B9GUZ6 A4GYU8 A0A2K1XL83 B9H7A3 A0A2K2BZR0 A0A2K1Z7R4 B9IGG6 B9H917 B9HD67 B9HJ44 A9PBL6 B9I906 B9GEM9 A9P9G9 B9H602 U5GFL8 A4GYU7 A0A2K1XLI8 B9N0S4 A9PCZ0 A0A2K2B2X9 A0A2K2A8V5 B9N8K9 B9HVP6 B9I3F7 A0A2K2B7U1 A9P9U4 B9INH0 A9PCN3 A4GYU4 U5G4E1 A9PD73 A9PHP7 …
	carboxylic acid metabolic process	7	GO:0019752	324	1751	2536	36890	2.69	2.8056e-58	57.55	B9HI53 A0A2K2APU3 B9HY30 A0A2K1ZZZ2 A9P841 U5GE19 A0A2K2A3G6 A9P828 A9P8R3 A0A2K1ZGR1 A0A2K1Z3Q5 A0A2K1Z8A2 A0A2K1Z5D7 A9P9M1 B9I0B9 U5GL25 A0A2K1YMW9 B9HS53 B9HFM8 A0A2K2BY33 A0A2K2AS12 B9GUZ6 B9I8I7 A0A2K1ZM07 B9MXP7 B9I8Q3 A0A2K1Z7R4 B9GPM4 B9GXM5 U5FIP4 B9HJ44 A0A2K2ADH3 A0A2K2AXK4 B9I906 A0A2K2A0Q9 U5FPD9 B9H602 A0A2K1WPL9 B9N7N3 A0A2K1XGK5 B9HHZ9 A0A2K1XS76 B9I0B5 B9N0S4 A0A2K2AZ44 A0A2K1ZA…
	organic acid metabolic process	5	GO:0006082	330	1810	2536	36890	2.65	1.6877e-57	56.77	B9HI53 A0A2K2APU3 B9HY30 A0A2K1ZZZ2 A9P841 U5GE19 A0A2K2A3G6 A9P828 A9P8R3 A0A2K1ZGR1 A0A2K1Z3Q5 A0A2K1Z8A2 A0A2K1Z5D7 A9P9M1 B9I0B9 U5GL25 A0A2K1YMW9 B9HS53 B9HFM8 A0A2K2BY33 A0A2K2AS12 B9GUZ6 B9I8I7 A0A2K1ZM07 B9MXP7 B9I8Q3 A0A2K1Z7R4 B9GPM4 B9GXM5 U5FIP4 B9HJ44 A0A2K2ADH3 A0A2K2AXK4 B9I906 A0A2K2A0Q9 U5FPD9 B9H602 A0A2K1WPL9 B9N7N3 A0A2K1XGK5 B9HHZ9 A0A2K1XS76 B9I0B5 B9N0S4 A0A2K2AZ44 A0A2K1ZA…
	oxoacid metabolic process	6	GO:0043436	328	1805	2536	36890	2.64	8.0341e-57	56.1	B9HI53 A0A2K2APU3 B9HY30 A0A2K1ZZZ2 A9P841 U5GE19 A0A2K2A3G6 A9P828 A9P8R3 A0A2K1ZGR1 A0A2K1Z3Q5 A0A2K1Z8A2 A0A2K1Z5D7 A9P9M1 B9I0B9 U5GL25 A0A2K1YMW9 B9HS53 B9HFM8 A0A2K2BY33 A0A2K2AS12 B9GUZ6 B9I8I7 A0A2K1ZM07 B9MXP7 B9I8Q3 A0A2K1Z7R4 B9GPM4 B9GXM5 U5FIP4 B9HJ44 A0A2K2ADH3 A0A2K2AXK4 B9I906 A0A2K2A0Q9 U5FPD9 B9H602 A0A2K1WPL9 B9N7N3 A0A2K1XGK5 B9HHZ9 A0A2K1XS76 B9I0B5 B9N0S4 A0A2K2AZ44 A0A2K1ZA…
	generation of precursor metabolites and energy	4	GO:0006091	115	516	2536	36890	3.24	3.0109e-32	31.52	B9HI53 B9GWN0 B9HY30 A9P9M5 A9P828 A9P8R3 A0A2K1ZAP5 B9GV29 A9PI52 A9PE75 A0A2K1YZ32 A9P9M1 A0A2K1Z1Z7 A0A2K1ZQ78 B9HFX9 B9I107 U5FJW8 A4GYQ4 U7DY66 A9PFJ7 B9GS73 A0A2K2A0K3 B9H3N1 B9H5X2 A0A2K1WSW3 B9I2N0 B9MXP7 B9IKU0 B9I518 A9PHA1 B9GGN1 A0A2K2BLS5 B9GGU9 B9GPM4 B9HI15 B9GNW0 A0A2K1WX39 A9P7V6 B9HTM3 A0A2K2AXK4 A0A2K2A0Q9 A0A2K2AEH3 B9IAR5 A9PCR0 B9HCM1 B9HXL0 B9H3K3 B9H851 A9PGZ3 U5GHX9 B9HW4…
	single-organism metabolic process	3	GO:0044710	939	8752	2536	36890	1.56	3.909e-29	28.41	A9PGX5 B9HI53 A0A2K1Y5S1 A0A2K1ZUV8 B9GWN0 B9MXR8 B9HY30 B9I3M0 A0A2K1ZZZ2 A9P841 U5GBI8 B9HHA8 A9P828 A0A2K1ZPD6 A0A2K2A507 A9P8R3 U5GAL7 A0A2K2BQP8 B9I383 B9IJK8 A9PD87 A0A2K1ZGR1 A0A2K1Z8A2 A0A2K1X089 A0A2K1Z5D7 B9N0N0 B9N6N2 U5GL25 A9PFL3 A0A2K1YMW9 B9MXE8 A0A2K1YD38 B9HFM8 A0A2K2BY33 B9HM98 B9H5C2 B9HME1 B9I8I7 A9PD09 U5FXE5 A9PBU4 B9I8Q3 U5FXK8 B9HWR3 A0A2K1ZF68 A0A2K1Z7R4 B9GKW3 B9GNW0 B9I…
	ribose phosphate metabolic process	6	GO:0019693	117	564	2536	36890	3.02	4.6076e-29	28.34	B9H3V6 B9HI53 B9GWN0 A0A2K1XTC5 B9HY30 B9MUA4 B9I3M0 B9I241 B9GWW3 A9P828 B9GWS1 B9IJK8 A9PD87 A0A2K1ZAP5 B9GV29 A4GYR7 A9PCK1 A0A2K1YZ32 A9P9M1 A0A2K1Z1Z7 A4GYP3 A0A2K2BIJ3 B9H5P7 U7DY66 A0A2K1ZFK2 A9PFJ7 A0A2K1XUJ1 A0A2K2A3F5 B9GS73 B9H5X2 B9GSG0 B9I2N0 B9MXP7 B9IKU0 B9I518 A9PBU4 A9PHA1 B9GGN1 B9IJ21 B9HWR3 B9GPM4 B9HYB2 A0A2K1WX39 B9HWA2 A9P7V6 U5G9M2 A0A2K2A0Q9 B9I5L2 A0A2K1YA69 B9IDK3 A9PFE…
	nucleobase-containing small molecule metabolic process	6	GO:0055086	153	875	2536	36890	2.54	6.7285e-27	26.17	B9HI53 B9GWN0 A0A2K1XTC5 B9HY30 B9I3M0 B9I241 B9GWW3 B9HHA8 A0A2K1Y2U2 A9P828 A9P8R3 B9IJK8 A9PD87 B9GV29 A4GYR7 A9PGD8 A0A2K1YZ32 A9P9M1 A0A2K1Z1Z7 A4GYP3 A0A2K2BY33 B9HME1 A0A2K1XUJ1 B9HJA3 B9GS73 B9GSG0 B9I2N0 B9MXP7 B9GFJ3 A9PBU4 B9HWR3 B9GPM4 A9PIA2 B9HYB2 A0A2K2AVA3 U5G9M2 U5FNA4 A0A2K2A0Q9 U5GXR0 A0A2K1YA69 B9IDK3 B9IK63 A9PGW6 B9HY29 B9ILW8 U5FKT7 A9PFD1 A0A2K1XJ11 B9HZE4 U5G5W8 U5FVI3 A9…
	ribonucleotide metabolic process	9	GO:0009259	103	502	2536	36890	2.98	2.0153e-25	24.7	B9HI53 B9GWN0 A0A2K1XTC5 B9HY30 B9MUA4 B9I3M0 B9GWW3 A9P828 B9GWS1 A9PD87 A0A2K1ZAP5 B9GV29 A4GYR7 A9PCK1 A0A2K1YZ32 A9P9M1 A0A2K1Z1Z7 A4GYP3 A0A2K2BIJ3 B9H5P7 U7DY66 A9PFJ7 A0A2K1XUJ1 A0A2K2A3F5 B9GS73 B9H5X2 B9GSG0 B9I2N0 B9MXP7 B9IKU0 B9I518 A9PBU4 A9PHA1 B9GGN1 B9IJ21 B9HWR3 B9GPM4 B9HYB2 A0A2K1WX39 B9HWA2 A9P7V6 U5G9M2 A0A2K2A0Q9 B9I5L2 A0A2K1YA69 A9PFE9 B9IK63 B9HY29 B9ILW8 U5GP63 U5FKT7 B9…
	cofactor metabolic process	4	GO:0051186	130	719	2536	36890	2.63	7.3036e-25	24.14	B9HI53 B9HY30 B9I241 A9P841 A0A2K1WPR3 A4GYS0 B9HHA8 A9P828 A9P8R3 B9IJK8 B9GV29 A0A2K1YZ32 A9P9M1 A0A2K1Z1Z7 A0A2K1X776 B9HME1 B9HJA3 B9I8I7 B9I2N0 B9GFJ3 B9I8Q3 A9PF50 A9PG24 B9GN69 B9GPM4 A9PIA2 B9GNW0 B9H1C6 B9IG96 U5FIP4 A9PDZ7 A0A2K2A0Q9 B9HGK9 B9IDK3 B9HY29 B9N3M4 B9I331 B9HZE4 U5G5W8 B9HDQ7 A9P9U1 B9N1W3 B9GL99 B9GTA7 A0A2K1ZWQ5 B9GJU3 B9GM35 B9GLB6 B9N843 U5G3E4 B9HKC4 A0A2K1ZX21 B9HIF7 …
	purine-containing compound metabolic process	5	GO:0072521	107	539	2536	36890	2.89	7.7804e-25	24.11	B9HI53 B9GWN0 A0A2K1XTC5 B9HY30 B9I3M0 A9P828 B9GWS1 A9PD87 A0A2K1ZAP5 B9GV29 A4GYR7 A9PGD8 A9PCK1 A0A2K1YZ32 A9P9M1 A0A2K1Z1Z7 A4GYP3 A0A2K2BIJ3 U7DY66 A9PFJ7 A0A2K2A3F5 B9GS73 B9HNV5 B9H5X2 B9GSG0 B9I2N0 A0A2K2BNI4 B9MXP7 B9IKU0 B9I518 B9GFJ3 A9PBU4 A9PHA1 B9GGN1 B9IJ21 B9GPM4 A9PIA2 B9HYB2 A0A2K1WX39 B9HWA2 A9P7V6 U5FNA4 A0A2K2A0Q9 B9I5L2 A0A2K1YA69 A9PFE9 B9IK63 B9HY29 B9ILW8 U5GP63 U5FKT7 B9…
	nucleoside phosphate metabolic process	7	GO:0006753	131	728	2536	36890	2.62	8.4071e-25	24.08	B9HI53 B9GWN0 A0A2K1XTC5 B9HY30 B9I3M0 B9I241 B9GWW3 B9HHA8 A9P828 A9P8R3 B9IJK8 A9PD87 B9GV29 A4GYR7 A0A2K1YZ32 A9P9M1 A0A2K1Z1Z7 A4GYP3 B9HME1 A0A2K1XUJ1 B9HJA3 B9GS73 B9GSG0 B9I2N0 B9MXP7 A9PBU4 B9HWR3 B9GPM4 B9HYB2 A0A2K2AVA3 U5G9M2 A0A2K2A0Q9 A0A2K1YA69 B9IDK3 B9IK63 B9HY29 B9ILW8 U5FKT7 A0A2K1XJ11 B9HZE4 U5G5W8 U5FVI3 A9P9U1 B9N1W3 B9GL99 B9HLY1 A0A2K1XEJ1 A0A2K2A7Y7 A0A2K1WMX8 B9HT78 B9H1A…

## Sheet: ident GO2Protein
GO Terms Level 1	GO Terms Description	GO Terms Level	GO Terms ID	Fisher's exact test P value	Protein accession	Protein description	Gene name	Type	Sequence coverage [%]	Mol. weight [kDa]	Score	MS/MS Counts	Peptides	Unique peptides
Cellular Component	GO:0019867	3	outer membrane	0.000381517	B9GJU0	Mitochondrial import receptor subunit TOM20 OS=Solanum tuberosum GN=TOM20 PE=1 SV=1	POPTR_0001s33780g	ident	20.4	22.754	39.987	4	3	3
Cellular Component	GO:0019867	3	outer membrane	0.000381517	A0A2K2AGV8	Mitochondrial outer membrane protein porin 2 OS=Arabidopsis thaliana GN=VDAC2 PE=1 SV=1	POPTR_005G146800v3	ident	17.4	29.349	41.461	8	6	3
Cellular Component	GO:0019867	3	outer membrane	0.000381517	B9GYS5	Protein TOC75-3, chloroplastic OS=Arabidopsis thaliana GN=TOC75-3 PE=1 SV=1	POPTR_0003s15670g	ident	15.2	89.356	7.1676	1	10	1
Cellular Component	GO:0019867	3	outer membrane	0.000381517	U5G7Y6	VDAC2.1 family protein	POPTR_0007s09780g	ident	18.5	29.397	17.524	3	6	3
Cellular Component	GO:0019867	3	outer membrane	0.000381517	A0A2K1YWB7	Sorting and assembly machinery component 50 homolog OS=Xenopus tropicalis GN=samm50 PE=2 SV=1	POPTR_010G185600v3	ident	9.7	56.245	33.076	5	5	5
Cellular Component	GO:0019867	3	outer membrane	0.000381517	A0A2K1XZU4	Mitochondrial Rho GTPase	POPTR_013G023100v3	ident	13.3	71.15	64.166	7	6	1
Cellular Component	GO:0019867	3	outer membrane	0.000381517	B9GRT9	Translocase of chloroplast	POPTR_0002s18420g	ident	8.8	33.116	11.682	3	2	2
Cellular Component	GO:0019867	3	outer membrane	0.000381517	A0A2K2BSV1	Mitochondrial import receptor subunit TOM20 OS=Solanum tuberosum GN=TOM20 PE=1 SV=1	POPTR_001G054900v3	ident	16.5	18.937	25.085	2	2	2
Cellular Component	GO:0019867	3	outer membrane	0.000381517	U5GQU7	Uncharacterized protein	POPTR_0003s14620g	ident	3	56.375	8.2706	1	1	1
Cellular Component	GO:0019867	3	outer membrane	0.000381517	B9IBR6	Mitochondrial outer membrane protein porin 2 OS=Arabidopsis thaliana GN=VDAC2 PE=1 SV=1	POPTR_0014s01660g	ident	6.2	29.322	11.622	2	2	2
Cellular Component	GO:0019867	3	outer membrane	0.000381517	B9IM03	VDAC3.1 family protein	POPTR_0018s10180g	ident	9.8	29.534	16.668	2	2	2
Cellular Component	GO:0019867	3	outer membrane	0.000381517	B9GRD7	Mitochondrial import receptor subunit TOM22 family protein	POPTR_0002s25900g	ident	8.3	11.601	6.4958	1	1	1
Cellular Component	GO:0019867	3	outer membrane	0.000381517	A9PCP8	Mitochondrial outer membrane protein porin of 34 kDa OS=Solanum tuberosum PE=1 SV=2	POPTR_0017s11430g	ident	28.1	29.125	88.719	9	7	7
Cellular Component	GO:0019867	3	outer membrane	0.000381517	A9P802	Porin family protein	POPTR_0010s04240g	ident	18.5	29.499	58.587	8	7	6
Cellular Component	GO:0019867	3	outer membrane	0.000381517	B9GMY2	Outer membrane family protein	POPTR_0001s12500g	ident	23.9	89.494	177.32	22	14	5
Cellular Component	GO:0019867	3	outer membrane	0.000381517	A9PD04	Porin family protein	POPTR_0008s19940g	ident	27.2	29.608	51.567	6	5	4
Cellular Component	GO:0089701	10	U2AF	0.29839	B9HEU4	U2 snRNP auxiliary factor large subunit	POPTR_0007s12550g	ident	7.8	60.957	7.2111	1	3	1
Cellular Component	GO:0089701	10	U2AF	0.29839	A0A2K2BB90	Splicing factor U2af small subunit B OS=Arabidopsis thaliana GN=U2AF35B PE=1 SV=1	POPTR_002G003000v3	ident	15.9	23.22	44.374	4	4	4
Cellular Component	GO:0030119	9	AP-type membrane coat adaptor complex	0.00203645	B9H9C3	Beta-adaptin-like protein	POPTR_0006s25970g	ident	8.7	93.001	74.007	6	5	5
Cellular Component	GO:0030119	9	AP-type membrane coat adaptor complex	0.00203645	B9HLR8	AP-1 complex subunit mu-2 OS=Arabidopsis thaliana GN=AP1M2 PE=1 SV=1	POPTR_0008s19180g	ident	2.2	41.285	5.9772	1	1	1
Cellular Component	GO:0030119	9	AP-type membrane coat adaptor complex	0.00203645	B9GWT9	Beta-adaptin-like protein	POPTR_0003s13040g	ident	6.3	100.18	30.07	5	5	5
Cellular Component	GO:0030119	9	AP-type membrane coat adaptor complex	0.00203645	A0A2K1ZZH1	AP-1 complex subunit gamma	POPTR_006G092800v3	ident	3.6	94.879	18.395	2	3	3
Cellular Component	GO:0030119	9	AP-type membrane coat adaptor complex	0.00203645	A0A2K2BGR5	AP-4 complex subunit mu OS=Arabidopsis thaliana GN=AP4M PE=2 SV=1	POPTR_002G105100v3	ident	26.7	50.214	91.974	10	10	10
Cellular Component	GO:0030119	9	AP-type membrane coat adaptor complex	0.00203645	A9PDI1	AP47/50p mRNA family protein	POPTR_0003s08940g	ident	13.2	49.31	33.69	5	5	5
Cellular Component	GO:0030119	9	AP-type membrane coat adaptor complex	0.00203645	U5G2B5	Uncharacterized protein	POPTR_0010s17770g	ident	3.2	31.209	5.7739	1	1	1
Cellular Component	GO:0030119	9	AP-type membrane coat adaptor complex	0.00203645	A0A2K2AWW3	AP-2 complex subunit alpha	POPTR_004G189700v3	ident	9.1	101.63	52.138	7	7	7
Cellular Component	GO:0098800	13	inner mitochondrial membrane protein complex	6.71381e-09	B9HEW3	Succinate dehydrogenase [ubiquinone] flavoprotein subunit, mitochondrial	POPTR_0007s12750g	ident	27.2	69.859	198.88	11	11	6
Cellular Component	GO:0098800	13	inner mitochondrial membrane protein complex	6.71381e-09	B9GWN0	Cytochrome c oxidase family protein	POPTR_0003s05880g	ident	13.5	17.946	14.044	2	2	2
Cellular Component	GO:0098800	13	inner mitochondrial membrane protein complex	6.71381e-09	B9HFT3	Cytochrome c oxidase subunit 6a, mitochondrial OS=Arabidopsis thaliana GN=COX6A PE=2 SV=1	POPTR_0007s14540g	ident	13.7	14.218	6.2338	1	1	1
Cellular Component	GO:0098800	13	inner mitochondrial membrane protein complex	6.71381e-09	B9H7R3	Cytochrome b-c1 complex subunit 6	POPTR_0005s21330g	ident	21.7	7.9962	9.8322	1	1	1
Cellular Component	GO:0098800	13	inner mitochondrial membrane protein complex	6.71381e-09	B9GP93	Probable mitochondrial import inner membrane translocase subunit TIM21 OS=Arabidopsis thaliana GN=TIM21 PE=1 SV=1	POPTR_0002s14160g	ident	5.5	26.802	6.1543	1	1	1
Cellular Component	GO:0098800	13	inner mitochondrial membrane protein complex	6.71381e-09	U5FES1	NADH dehydrogenase [ubiquinone] 1 alpha subcomplex subunit 12	POPTR_0019s07820g	ident	22.9	21.025	28.272	4	3	3
Cellular Component	GO:0098800	13	inner mitochondrial membrane protein complex	6.71381e-09	A0A2K1WWB4	Uncharacterized protein	POPTR_018G055600v3	ident	8	9.9045	5.6288	2	1	1
Cellular Component	GO:0098800	13	inner mitochondrial membrane protein complex	6.71381e-09	B9HWA2	ATP synthase subunit beta	POPTR_0010s12680g	ident	46.2	59.81	323.31	54	19	18
Cellular Component	GO:0098800	13	inner mitochondrial membrane protein complex	6.71381e-09	B9H3E2	NADH dehydrogenase [ubiquinone] iron-sulfur protein 1, mitochondrial OS=Solanum tuberosum PE=2 SV=1	POPTR_0004s08110g	ident	19.8	79.963	87.934	15	12	6
Cellular Component	GO:0098800	13	inner mitochondrial membrane protein complex	6.71381e-09	B9I1A3	NLI interacting factor family protein	POPTR_0011s09550g	ident	3.6	41.549	7.5171	1	1	1
Cellular Component	GO:0098800	13	inner mitochondrial membrane protein complex	6.71381e-09	A9PDH8	mRNA for epsilon subunit of mitochondrial F1-ATPase family protein	POPTR_0010s25640g	ident	31.4	7.7528	13.092	3	2	2
Cellular Component	GO:0098800	13	inner mitochondrial membrane protein complex	6.71381e-09	A9PB99	NADH-ubiquinone oxidoreductase 19 kDa subunit family protein	POPTR_0008s20110g	ident	15.9	12.031	12.291	2	2	2
Cellular Component	GO:0098800	13	inner mitochondrial membrane protein complex	6.71381e-09	B9HLY1	ATP synthase subunit d, mitochondrial	POPTR_0008s04340g	ident	17.9	19.919	8.0039	2	2	1
Cellular Component	GO:0098800	13	inner mitochondrial membrane protein complex	6.71381e-09	B9HRF5	Complex 1 family protein	POPTR_0009s12750g	ident	20.7	13.615	18.085	3	2	2
Cellular Component	GO:0098800	13	inner mitochondrial membrane protein complex	6.71381e-09	A0A2K2A7Y7	Cytochrome b-c1 complex subunit 7	POPTR_006G250000v3	ident	27	14.706	22.932	3	3	2
Cellular Component	GO:0098800	13	inner mitochondrial membrane protein complex	6.71381e-09	B9HU25	ATP synthase subunit d, mitochondrial	POPTR_0010s22480g	ident	16.1	19.659	27.314	5	3	2
Cellular Component	GO:0098800	13	inner mitochondrial membrane protein complex	6.71381e-09	A9P8N3	NADH2 dehydrogenase family protein	POPTR_0015s06500g	ident	20.6	12.591	6.3971	2	2	1
Cellular Component	GO:0098800	13	inner mitochondrial membrane protein complex	6.71381e-09	B9GS73	NADH-ubiquinone oxidoreductase 24 kDa subunit family protein	POPTR_0002s04610g	ident	17.3	28.277	31.964	7	5	5
Cellular Component	GO:0098800	13	inner mitochondrial membrane protein complex	6.71381e-09	B9H8N0	Uncharacterized protein	POPTR_0005s24660g	ident	10.7	23.106	11.224	2	2	2
Cellular Component	GO:0098800	13	inner mitochondrial membrane protein complex	6.71381e-09	B9N332	Mitochondrial import inner membrane translocase subunit Tim17 family protein	POPTR_0006s17850g	ident	4.1	22.836	5.9569	1	1	1
Cellular Component	GO:0098800	13	inner mitochondrial membrane protein complex	6.71381e-09	B9IK63	Mitochondrial processing peptidase beta subunit family protein	POPTR_0017s12800g	ident	25.6	58.604	38.02	5	10	5
Cellular Component	GO:0098800	13	inner mitochondrial membrane protein complex	6.71381e-09	A9PC01	NADH2 dehydrogenase family protein	POPTR_0012s05350g	ident	29	12.613	29.023	6	3	2
Cellular Component	GO:0098800	13	inner mitochondrial membrane protein complex	6.71381e-09	B9MXP7	Succinate dehydrogenase [ubiquinone] flavoprotein subunit, mitochondrial	POPTR_0005s12530g	ident	12.4	70.164	7.013	1	6	1
Cellular Component	GO:0098800	13	inner mitochondrial membrane protein complex	6.71381e-09	A9PBU4	Uncharacterized protein	POPTR_0006s24810g	ident	11.5	14.045	11.01	3	2	0
Cellular Component	GO:0098800	13	inner mitochondrial membrane protein complex	6.71381e-09	B9IKU0	Cytochrome b-c1 complex subunit 7	POPTR_0018s01370g	ident	22.9	14.175	29.413	2	2	1
Cellular Component	GO:0009534	11	chloroplast thylakoid	4.613e-09	A4GYS8	Cytochrome b559 subunit alpha	psbE	ident	22.9	9.3965	13.654	2	2	2
Cellular Component	GO:0009534	11	chloroplast thylakoid	4.613e-09	B9HV08	Ribosomal family protein	POPTR_0010s26060g	ident	12.2	15.97	12.403	2	2	2
Cellular Component	GO:0009534	11	chloroplast thylakoid	4.613e-09	A4GYR7	ATP synthase subunit beta, chloroplastic	atpB	ident	45.2	53.706	274.64	47	17	16
Cellular Component	GO:0009534	11	chloroplast thylakoid	4.613e-09	B9HLY1	ATP synthase subunit d, mitochondrial	POPTR_0008s04340g	ident	17.9	19.919	8.0039	2	2	1
Cellular Component	GO:0009534	11	chloroplast thylakoid	4.613e-09	A9PI52	Protease Do-like 1, chloroplastic OS=Arabidopsis thaliana GN=DEGP1 PE=1 SV=2	POPTR_0001s34960g	ident	5.1	45.354	14.899	3	2	2
Cellular Component	GO:0009534	11	chloroplast thylakoid	4.613e-09	A9PE75	Chlorophyll a-b binding protein, chloroplastic	POPTR_0014s17070g	ident	15.7	29.605	14.206	2	2	2
Cellular Component	GO:0009534	11	chloroplast thylakoid	4.613e-09	A4GYS2	Photosystem I assembly protein Ycf4	ycf4	ident	14.1	21.45	18.408	3	3	3
Cellular Component	GO:0009534	11	chloroplast thylakoid	4.613e-09	A4GYR6	ATP synthase epsilon chain, chloroplastic	atpE	ident	7.5	14.564	5.6267	1	1	1
Cellular Component	GO:0009534	11	chloroplast thylakoid	4.613e-09	A4GYW7	Photosystem I iron-sulfur center	psaC	ident	51.9	9.0384	26.115	5	4	4
Cellular Component	GO:0009534	11	chloroplast thylakoid	4.613e-09	A4GYP3	ATP synthase subunit alpha, chloroplastic	atpA	ident	27.6	55.322	134.86	26	12	12
Cellular Component	GO:0009534	11	chloroplast thylakoid	4.613e-09	B9GSX3	P II nitrogen sensing family protein	POPTR_0002s19200g	ident	10.4	21.953	14.143	2	2	2
Cellular Component	GO:0009534	11	chloroplast thylakoid	4.613e-09	B9I107	Chlorophyll a-b binding protein, chloroplastic	POPTR_0011s02770g	ident	9.8	28.053	6.2295	1	2	1
Cellular Component	GO:0009534	11	chloroplast thylakoid	4.613e-09	A4GYQ4	Photosystem II D2 protein	psbD	ident	13.9	39.549	44.691	5	3	3
Cellular Component	GO:0009534	11	chloroplast thylakoid	4.613e-09	B9I2Y8	Geranylgeranyl reductase family protein	POPTR_0012s07060g	ident	38.5	52.15	261.13	24	15	15
Cellular Component	GO:0009534	11	chloroplast thylakoid	4.613e-09	A4GYQ9	Photosystem I P700 chlorophyll a apoprotein A2	psaB	ident	4.4	82.417	18.966	4	3	3
Cellular Component	GO:0009534	11	chloroplast thylakoid	4.613e-09	U5GSW6	Lil3 family protein	POPTR_0001s15140g	ident	5.9	28.137	14.297	1	1	1
Cellular Component	GO:0009534	11	chloroplast thylakoid	4.613e-09	B9IA25	FtsH-like protein Pftf	POPTR_0014s13560g	ident	18.5	74.157	106.94	15	12	5
Cellular Component	GO:0009534	11	chloroplast thylakoid	4.613e-09	B9I5K3	NADPH-protochlorophyllide oxidoreductase	POPTR_0013s13910g	ident	21.4	43.772	46.78	9	7	4
Cellular Component	GO:0009534	11	chloroplast thylakoid	4.613e-09	B9H5C6	Plastocyanin	POPTR_0005s26740g	ident	25	17.02	43.745	4	2	2
Cellular Component	GO:0009534	11	chloroplast thylakoid	4.613e-09	A4GYQ5	Photosystem II CP43 reaction center protein	psbC	ident	9.9	51.805	29.756	4	3	3
Cellular Component	GO:0009534	11	chloroplast thylakoid	4.613e-09	A4GYP4	ATP synthase subunit b, chloroplastic	atpF	ident	22.3	20.828	81.128	3	3	3
Cellular Component	GO:0009534	11	chloroplast thylakoid	4.613e-09	A4GYR0	Photosystem I P700 chlorophyll a apoprotein A1	psaA	ident	7.3	83.145	36.829	11	6	6
Cellular Component	GO:0009534	11	chloroplast thylakoid	4.613e-09	B9IAR5	Chlorophyll a-b binding protein, chloroplastic	POPTR_0014s16300g	ident	12.1	28.513	20.426	3	3	2
Cellular Component	GO:0009534	11	chloroplast thylakoid	4.613e-09	B9HU25	ATP synthase subunit d, mitochondrial	POPTR_0010s22480g	ident	16.1	19.659	27.314	5	3	2
Cellular Component	GO:0009534	11	chloroplast thylakoid	4.613e-09	U5FMV2	Light-harvesting complex-like protein 3 isotype 1, chloroplastic OS=Arabidopsis thaliana GN=LIL3.1 PE=1 SV=1	POPTR_0015s12260g	ident	12.6	28.546	22.429	3	3	3
Cellular Component	GO:0009534	11	chloroplast thylakoid	4.613e-09	B9I013	Chlorophyll a-b binding protein, chloroplastic	POPTR_0011s12680g	ident	7.8	25.142	11.926	2	2	2
Cellular Component	GO:0009534	11	chloroplast thylakoid	4.613e-09	B9HCM1	Chlorophyll a-b binding protein, chloroplastic	POPTR_0006s10040g	ident	18.9	31.175	41.649	6	5	2
Cellular Component	GO:0009534	11	chloroplast thylakoid	4.613e-09	B9H851	Photosystem 2 family protein	POPTR_0005s22780g	ident	7.4	19.313	7.4804	1	1	1
Cellular Component	GO:0009534	11	chloroplast thylakoid	4.613e-09	A9PGZ3	Chlorophyll a-b binding protein, chloroplastic	POPTR_0019s09140g	ident	29.3	30.924	53.113	9	6	6
Cellular Component	GO:0009534	11	chloroplast thylakoid	4.613e-09	A9PIG1	Photosystem II 22 kDa family protein	POPTR_0002s08410g	ident	15.4	28.992	29.897	4	3	3
Cellular Component	GO:0009534	11	chloroplast thylakoid	4.613e-09	A4GYN9	Photosystem II protein D1	psbA	ident	13.6	38.964	37.684	6	4	4
Cellular Component	GO:0009534	11	chloroplast thylakoid	4.613e-09	B9IJY7	FtsH protease family protein	POPTR_0017s12030g	ident	4.9	73.177	7.1599	1	3	1
Cellular Component	GO:0005737	6	cytoplasm	1.58753e-182	A9PBI3	Ribosomal protein L7Ae/L30e/S12e/Gadd45	POPTR_0013s12110g	ident	17.2	13.9	11.635	1	1	1
Cellular Component	GO:0005737	6	cytoplasm	1.58753e-182	B9GWN0	Cytochrome c oxidase family protein	POPTR_0003s05880g	ident	13.5	17.946	14.044	2	2	2
Cellular Component	GO:0005737	6	cytoplasm	1.58753e-182	A9PE73	Chalcone-flavonone isomerase family protein	POPTR_0010s21980g	ident	17.9	24.252	22.363	5	3	3
Cellular Component	GO:0005737	6	cytoplasm	1.58753e-182	B9MXR8	Quinone reductase family protein	POPTR_0005s12770g	ident	9.9	27.038	12.859	2	2	2
Cellular Component	GO:0005737	6	cytoplasm	1.58753e-182	B9I6V1	Chloroplast inner envelope family protein	POPTR_0013s15040g	ident	12.8	111.9	98.218	15	12	6
Cellular Component	GO:0005737	6	cytoplasm	1.58753e-182	A0A2K1Z6C5	Coatomer subunit gamma	POPTR_009G115100v3	ident	14.5	90.668	24.689	3	8	3
Cellular Component	GO:0005737	6	cytoplasm	1.58753e-182	B9GP93	Probable mitochondrial import inner membrane translocase subunit TIM21 OS=Arabidopsis thaliana GN=TIM21 PE=1 SV=1	POPTR_0002s14160g	ident	5.5	26.802	6.1543	1	1	1
Cellular Component	GO:0005737	6	cytoplasm	1.58753e-182	B9GX38	Calcium-dependent protein kinase 1 OS=Oryza sativa subsp. japonica GN=CPK1 PE=2 SV=1	POPTR_0003s13380g	ident	9.2	59.019	30.465	4	4	1
Cellular Component	GO:0005737	6	cytoplasm	1.58753e-182	A0A2K1ZZZ2	Diaminopimelate epimerase, chloroplastic OS=Arabidopsis thaliana GN=DAPF PE=1 SV=1	POPTR_006G102700v3	ident	21.1	35.135	48.04	6	5	5
Cellular Component	GO:0005737	6	cytoplasm	1.58753e-182	B9HLY0	Mitochondrial substrate carrier family protein	POPTR_0008s04330g	ident	3.9	93.077	37.304	3	3	3
Cellular Component	GO:0005737	6	cytoplasm	1.58753e-182	A0A2K1YX28	Uncharacterized protein	POPTR_010G198600v3	ident	5.5	28.779	7.5586	1	1	1
Cellular Component	GO:0005737	6	cytoplasm	1.58753e-182	B9H3C6	Methionine aminopeptidase 2	POPTR_0004s08320g	ident	2.5	44.567	6.8802	1	1	1
Cellular Component	GO:0005737	6	cytoplasm	1.58753e-182	U5G5S8	26S protease regulatory subunit 8 homolog A OS=Arabidopsis thaliana GN=RPT6A PE=1 SV=1	POPTR_0008s14310g	ident	38.4	48.128	12.288	1	12	1
Cellular Component	GO:0005737	6	cytoplasm	1.58753e-182	A9P8R3	Malate dehydrogenase	POPTR_0008s16670g	ident	32.5	35.716	149.74	17	8	5
Cellular Component	GO:0005737	6	cytoplasm	1.58753e-182	B9I9L2	Thioredoxin family protein	POPTR_0014s11790g	ident	20.7	39.4	39.27	6	6	6
Cellular Component	GO:0005737	6	cytoplasm	1.58753e-182	A0A2K1ZGR1	Aspartate-semialdehyde dehydrogenase OS=Synechocystis sp. (strain PCC 6803 / Kazusa) GN=asd PE=3 SV=2	POPTR_008G135700v3	ident	8.7	37.094	20.12	3	3	3
Cellular Component	GO:0005737	6	cytoplasm	1.58753e-182	B9N0N0	Quinone oxidoreductase-like family protein	POPTR_0004s24200g	ident	19.1	34.494	41.918	7	5	4
Cellular Component	GO:0005737	6	cytoplasm	1.58753e-182	B9HJ33	50S ribosomal protein L15, chloroplastic (Fragment) OS=Pisum sativum GN=RPL15 PE=2 SV=1	POPTR_0008s12000g	ident	23.6	27.204	52.726	8	6	6
Cellular Component	GO:0005737	6	cytoplasm	1.58753e-182	U5GGG4	Chaperonin family protein	POPTR_0004s20620g	ident	21.4	60.439	18.967	3	11	3
Cellular Component	GO:0005737	6	cytoplasm	1.58753e-182	B9I1A1	30S ribosomal protein S10	POPTR_0011s09530g	ident	4.9	22.722	6.142	1	1	1
Cellular Component	GO:0005737	6	cytoplasm	1.58753e-182	B9N6N2	Type IIIa membrane protein cp-wap13	POPTR_0017s13350g	ident	32.1	41.235	73.518	17	10	5
Cellular Component	GO:0005737	6	cytoplasm	1.58753e-182	U5GL25	Argininosuccinate lyase, chloroplastic OS=Arabidopsis thaliana GN=At5g10920 PE=2 SV=1	POPTR_0002s10640g	ident	7.2	57.336	18.33	2	2	2
Cellular Component	GO:0005737	6	cytoplasm	1.58753e-182	B9INR8	PRA1 family protein	POPTR_0019s14510g	ident	12.1	21.845	22.282	3	3	3
Cellular Component	GO:0005737	6	cytoplasm	1.58753e-182	A9PFL3	Farnesyl-pyrophosphate synthetase fps2 family protein	POPTR_0006s00530g	ident	18.7	39.313	44.907	8	6	6
Cellular Component	GO:0005737	6	cytoplasm	1.58753e-182	A9PBS4	Ribosomal protein L19	POPTR_0001s15230g	ident	4.1	27.025	6.6816	2	1	1
Cellular Component	GO:0005737	6	cytoplasm	1.58753e-182	B9MXE8	L-ascorbate peroxidase 3, peroxisomal OS=Arabidopsis thaliana GN=APX3 PE=1 SV=1	POPTR_0005s11430g	ident	13.2	31.509	30.232	2	4	2
Cellular Component	GO:0005737	6	cytoplasm	1.58753e-182	B9HFM8	Acyl-coenzyme A oxidase	POPTR_0007s05710g	ident	11.9	77.622	57.724	10	8	8
Cellular Component	GO:0005737	6	cytoplasm	1.58753e-182	B9H5C2	Thioredoxin-like protein CDSP32, chloroplastic OS=Arabidopsis thaliana GN=CDSP32 PE=1 SV=1	POPTR_0005s26700g	ident	4.7	33.622	5.6556	1	1	1
Cellular Component	GO:0005737	6	cytoplasm	1.58753e-182	B9HIP9	Seed maturation protein PM36	POPTR_0008s10610g	ident	17.8	25.745	27.98	4	4	4
Cellular Component	GO:0005737	6	cytoplasm	1.58753e-182	B9I8I7	Cyclic nucleotide-binding domain-containing family protein	POPTR_0014s07900g	ident	12.2	48.75	40.311	6	5	5
Cellular Component	GO:0005737	6	cytoplasm	1.58753e-182	B9N680	Coatomer subunit beta	POPTR_0006s28810g	ident	16.2	105.57	86.794	14	11	8
Cellular Component	GO:0005737	6	cytoplasm	1.58753e-182	B9IE82	T-complex protein 1 subunit delta	POPTR_0015s04150g	ident	25	57.628	86.314	15	11	3
Cellular Component	GO:0005737	6	cytoplasm	1.58753e-182	A0A2K1XL83	60S ribosomal protein L34 OS=Nicotiana tabacum GN=RPL34 PE=2 SV=1	POPTR_015G106500v3	ident	24.5	11.801	12.888	3	2	2
Cellular Component	GO:0005737	6	cytoplasm	1.58753e-182	U5GGE4	Nicalin-1 OS=Danio rerio GN=ncl1 PE=2 SV=1	POPTR_0004s20910g	ident	3.1	60.194	5.6456	1	2	1
Cellular Component	GO:0005737	6	cytoplasm	1.58753e-182	A9PBU4	Uncharacterized protein	POPTR_0006s24810g	ident	11.5	14.045	11.01	3	2	0
Cellular Component	GO:0005737	6	cytoplasm	1.58753e-182	B9H7A3	30S ribosomal protein S13, chloroplastic OS=Arabidopsis thaliana GN=RPS13 PE=2 SV=1	POPTR_0005s16160g	ident	23.8	18.745	39.201	8	5	5
Cellular Component	GO:0005737	6	cytoplasm	1.58753e-182	U5GN78	Carboxypeptidase	POPTR_0004s22520g	ident	17.5	56.955	58.139	8	6	6
Cellular Component	GO:0005737	6	cytoplasm	1.58753e-182	B9HWR3	Phosphoribulokinase/uridine kinase family protein	POPTR_0010s14440g	ident	2.6	73.899	12.884	2	2	2
Cellular Component	GO:0005737	6	cytoplasm	1.58753e-182	A0A2K1Z7R4	Alanine--tRNA ligase	POPTR_009G141300v3	ident	9.7	76.234	47.372	5	5	5
Cellular Component	GO:0005737	6	cytoplasm	1.58753e-182	A0A2K1R4Q6	Protein VACUOLELESS1 OS=Arabidopsis thaliana GN=VCL1 PE=1 SV=1	POPTR_T159000v3	ident	5	55.651	15.119	2	2	2
Cellular Component	GO:0005737	6	cytoplasm	1.58753e-182	B9GNW0	Coenzyme Q-binding protein COQ10 homolog, mitochondrial OS=Danio rerio GN=zgc:73324 PE=2 SV=2	POPTR_0002s12760g	ident	11.2	28.356	16.703	2	2	2
Cellular Component	GO:0005737	6	cytoplasm	1.58753e-182	B9H0V6	Cysteine proteinase A494	POPTR_0004s16740g	ident	7.9	40.224	21.69	3	2	2
Cellular Component	GO:0005737	6	cytoplasm	1.58753e-182	B9IGG6	40S ribosomal protein S4	POPTR_0016s13210g	ident	37.6	29.719	136.95	17	9	3
Cellular Component	GO:0005737	6	cytoplasm	1.58753e-182	B9H917	Eukaryotic translation initiation factor 3 subunit L	POPTR_0006s25800g	ident	13.1	60.92	62.036	6	6	6
Cellular Component	GO:0005737	6	cytoplasm	1.58753e-182	U5FIP4	Methylenetetrahydrofolate reductase	POPTR_0017s00520g	ident	11.7	67.452	43.735	8	6	6
Cellular Component	GO:0005737	6	cytoplasm	1.58753e-182	B9HD67	60S ribosomal protein L27	POPTR_0006s02230g	ident	8.1	15.699	7.0164	2	1	1
Cellular Component	GO:0005737	6	cytoplasm	1.58753e-182	B9HJ44	tRNA-glutamine synthetase family protein	POPTR_0008s12140g	ident	21.1	90.389	108.85	17	13	13
Cellular Component	GO:0005737	6	cytoplasm	1.58753e-182	B9MZF5	ER membrane protein complex subunit 2 OS=Xenopus tropicalis GN=emc2 PE=2 SV=1	POPTR_0005s05290g	ident	15.6	33.784	29.059	4	4	4
Cellular Component	GO:0005737	6	cytoplasm	1.58753e-182	A9PBL6	40S ribosomal protein S24	POPTR_0030s00470g	ident	26.9	15.398	56.916	6	4	2
Cellular Component	GO:0005737	6	cytoplasm	1.58753e-182	A0A2K2BCI4	V-type proton ATPase subunit a	POPTR_002G028600v3	ident	1.5	83.802	6.2823	0	1	1
Cellular Component	GO:0005737	6	cytoplasm	1.58753e-182	B9I906	Glycine--tRNA ligase, chloroplastic/mitochondrial 2 OS=Arabidopsis thaliana GN=EDD1 PE=1 SV=1	POPTR_0014s04810g	ident	6.2	121.2	67.312	6	5	5
Cellular Component	GO:0005737	6	cytoplasm	1.58753e-182	B9GEM9	Elongation factor 1B alpha-subunit 2 family protein	POPTR_0001s23190g	ident	25.9	24.081	30.494	4	4	4
Cellular Component	GO:0005737	6	cytoplasm	1.58753e-182	U7E0X6	Peroxisomal multifunctional enzyme type 2 OS=Rattus norvegicus GN=Hsd17b4 PE=1 SV=3	POPTR_002G126200v3	ident	25.2	13.592	25.702	4	3	3
Cellular Component	GO:0005737	6	cytoplasm	1.58753e-182	B9IAR5	Chlorophyll a-b binding protein, chloroplastic	POPTR_0014s16300g	ident	12.1	28.513	20.426	3	3	2
Cellular Component	GO:0005737	6	cytoplasm	1.58753e-182	B9IG32	Fructokinase-like 1, chloroplastic OS=Arabidopsis thaliana GN=FLN1 PE=1 SV=1	POPTR_0016s11690g	ident	5.6	54.826	20.984	2	2	2
Cellular Component	GO:0005737	6	cytoplasm	1.58753e-182	B9GH21	Obg-like ATPase 1	POPTR_0001s47010g	ident	25.1	44.726	56.628	11	8	2
Cellular Component	GO:0005737	6	cytoplasm	1.58753e-182	U5FPD9	Acyl carrier protein	POPTR_0014s04350g	ident	7.4	13.792	7.6842	3	1	1
Cellular Component	GO:0005737	6	cytoplasm	1.58753e-182	B9H602	Alanine--tRNA ligase	POPTR_0005s09710g	ident	8.2	106.23	49.443	9	7	7
Cellular Component	GO:0005737	6	cytoplasm	1.58753e-182	U5GFL8	Eukaryotic translation initiation factor 3 subunit A	POPTR_0005s02130g	ident	14	113.23	131.72	14	12	12
Cellular Component	GO:0005737	6	cytoplasm	1.58753e-182	U5G6D2	Probable carboxylesterase 2 OS=Arabidopsis thaliana GN=CXE2 PE=2 SV=1	POPTR_0009s10780g	ident	5.5	40.407	12.647	2	2	2
Cellular Component	GO:0005737	6	cytoplasm	1.58753e-182	A0A2K2AL67	26S protease regulatory subunit S10B homolog B OS=Arabidopsis thaliana GN=RPT4B PE=1 SV=1	POPTR_005G231700v3	ident	27.9	42.82	62.769	9	8	7
Cellular Component	GO:0005737	6	cytoplasm	1.58753e-182	A9PGV8	Uncharacterized protein	POPTR_0002s25260g	ident	32.9	17.093	58.064	7	5	5
Cellular Component	GO:0005737	6	cytoplasm	1.58753e-182	B9IDK3	Glucosamine/galactosamine-6-phosphate isomerase family protein	POPTR_0015s00960g	ident	16.5	28.442	12.377	3	3	2
Cellular Component	GO:0005737	6	cytoplasm	1.58753e-182	A0A2K1ZEB4	[Fructose-bisphosphate aldolase]-lysine N-methyltransferase, chloroplastic OS=Arabidopsis thaliana GN=LSMT-L PE=1 SV=1	POPTR_008G090500v3	ident	7.9	54.046	31.15	5	5	5
Cellular Component	GO:0005737	6	cytoplasm	1.58753e-182	B9I0B5	Electron transfer flavoprotein alpha subunit	POPTR_0011s13890g	ident	11.7	36.978	19.983	3	3	3
Cellular Component	GO:0005737	6	cytoplasm	1.58753e-182	A9P9I3	Gamma-tonoplast intrinsic protein 2	POPTR_0006s12350g	ident	6.7	26.043	38.627	3	1	1
Cellular Component	GO:0005737	6	cytoplasm	1.58753e-182	A0A2K1XLI8	40S ribosomal protein SA	POPTR_015G112900v3	ident	41.3	31.698	171.53	19	10	3
Cellular Component	GO:0005737	6	cytoplasm	1.58753e-182	U5FHM4	Protein YIF1B-A OS=Xenopus laevis GN=yif1b-a PE=2 SV=1	POPTR_0017s05720g	ident	5.6	30.06	14.871	1	1	1
Cellular Component	GO:0005737	6	cytoplasm	1.58753e-182	A9PIG1	Photosystem II 22 kDa family protein	POPTR_0002s08410g	ident	15.4	28.992	29.897	4	3	3
Cellular Component	GO:0005737	6	cytoplasm	1.58753e-182	B9N0S4	Methionyl-tRNA synthetase family protein	POPTR_0017s08450g	ident	10.9	89.999	45.867	6	6	6
Cellular Component	GO:0005737	6	cytoplasm	1.58753e-182	A9PCZ0	40S ribosomal protein S15 OS=Oryza sativa subsp. japonica GN=RPS15 PE=2 SV=2	POPTR_0002s04420g	ident	24.3	17.225	19.895	2	2	2
Cellular Component	GO:0005737	6	cytoplasm	1.58753e-182	A0A2K2AZ44	Glutathione S-transferase zeta class OS=Euphorbia esula PE=2 SV=1	POPTR_004G232600v3	ident	27.4	24.12	26.638	5	4	4
Cellular Component	GO:0005737	6	cytoplasm	1.58753e-182	A9PE34	Proteasome subunit alpha type	POPTR_0003s07010g	ident	32.1	26.003	22.458	1	6	1
Cellular Component	GO:0005737	6	cytoplasm	1.58753e-182	A0A2K2A8V5	Eukaryotic translation initiation factor 3 subunit B	POPTR_006G267500v3	ident	22.2	64.451	91.989	18	12	2
Cellular Component	GO:0005737	6	cytoplasm	1.58753e-182	A9PE87	Tubulin beta chain	POPTR_0001s25410g	ident	16.5	50.41	7.6361	2	7	0
Cellular Component	GO:0005737	6	cytoplasm	1.58753e-182	A9PAK3	Reticulon-like protein	POPTR_0001s10040g	ident	11	28.418	18.394	3	3	1
Cellular Component	GO:0005737	6	cytoplasm	1.58753e-182	A9PA83	Histone H4	POPTR_0005s11740g	ident	33	11.409	37.629	10	5	3
Cellular Component	GO:0005737	6	cytoplasm	1.58753e-182	B9N8K9	tRNA-binding region domain-containing family protein	POPTR_0017s00530g	ident	19.6	30.053	25.854	5	4	4
Cellular Component	GO:0005737	6	cytoplasm	1.58753e-182	B9HVP6	Eukaryotic translation initiation factor 3 subunit I	POPTR_0010s11040g	ident	30.5	35.803	81.03	8	6	3
Cellular Component	GO:0005737	6	cytoplasm	1.58753e-182	A0A2K2AGV8	Mitochondrial outer membrane protein porin 2 OS=Arabidopsis thaliana GN=VDAC2 PE=1 SV=1	POPTR_005G146800v3	ident	17.4	29.349	41.461	8	6	3
Cellular Component	GO:0005737	6	cytoplasm	1.58753e-182	U5FKT7	Phosphoribosylaminoimidazole-succinocarboxamide synthase, chloroplastic OS=Arabidopsis thaliana GN=PUR7 PE=2 SV=2	POPTR_0017s07840g	ident	14	44.3	35.032	5	5	5
Cellular Component	GO:0005737	6	cytoplasm	1.58753e-182	B9I3F7	50S ribosomal protein L19, chloroplastic OS=Spinacia oleracea GN=RPL19 PE=1 SV=2	POPTR_0012s08870g	ident	3.3	27.425	-2	1	1	1
Cellular Component	GO:0005737	6	cytoplasm	1.58753e-182	U5FSD9	DYNAMIN-LIKE protein 4	POPTR_0014s04310g	ident	13.5	69.476	45.682	6	6	4
Cellular Component	GO:0005737	6	cytoplasm	1.58753e-182	A0A2K2B7U1	Tryptophan--tRNA ligase, chloroplastic/mitochondrial OS=Arabidopsis thaliana GN=OVA4 PE=1 SV=1	POPTR_003G158000v3	ident	4.8	23.168	6.0254	1	1	1
Cellular Component	GO:0005737	6	cytoplasm	1.58753e-182	U5FPV3	Uncharacterized protein	POPTR_0015s04430g	ident	6.9	32.95	13.109	2	2	2
Cellular Component	GO:0005737	6	cytoplasm	1.58753e-182	A9PHY3	Ribosome-binding factor PSRP1, chloroplastic OS=Spinacia oleracea GN=PSRP1 PE=1 SV=2	POPTR_0015s00430g	ident	3.3	34.338	6.7848	2	1	1
Cellular Component	GO:0005737	6	cytoplasm	1.58753e-182	A9P9U4	60S ribosomal protein L22-1	POPTR_0002s20540g	ident	38.4	14.037	9.6252	1	5	1
Cellular Component	GO:0005737	6	cytoplasm	1.58753e-182	B9GJD0	Viral IAP-associated factor homolog OS=Drosophila melanogaster GN=viaf PE=1 SV=1	POPTR_0001s34170g	ident	5.6	28.141	7.9143	1	1	1
Cellular Component	GO:0005737	6	cytoplasm	1.58753e-182	B9N381	Dihydropyrimidine dehydrogenase (NADP(+)), chloroplastic OS=Arabidopsis thaliana GN=PYD1 PE=1 SV=1	POPTR_0015s05410g	ident	27.1	46.528	79.145	18	10	10
Cellular Component	GO:0005737	6	cytoplasm	1.58753e-182	B9INH0	Glutamyl-tRNA(Gln) amidotransferase subunit C, chloroplastic/mitochondrial	GATC	ident	9.9	15.64	8.1479	1	1	1
Cellular Component	GO:0005737	6	cytoplasm	1.58753e-182	A9PCN3	GA family protein	POPTR_0011s15080g	ident	32.1	21.917	7.6534	1	8	1
Cellular Component	GO:0005737	6	cytoplasm	1.58753e-182	U5FJ45	Uncharacterized protein	POPTR_0018s11790g	ident	9.9	11.738	6.7293	1	1	1
Cellular Component	GO:0005737	6	cytoplasm	1.58753e-182	U5G4E1	40S ribosomal protein S9-2 OS=Arabidopsis thaliana GN=RPS9C PE=1 SV=1	POPTR_0007s09750g	ident	35	22.962	18.04	2	9	1
Cellular Component	GO:0005737	6	cytoplasm	1.58753e-182	A9PBP9	Ubiquitin-conjugating enzyme family protein	POPTR_0016s07400g	ident	30.8	16.605	21.212	6	3	2
Cellular Component	GO:0005737	6	cytoplasm	1.58753e-182	A9PCI7	Uncharacterized protein	POPTR_0010s11830g	ident	5.4	14.866	5.6491	1	1	1
Cellular Component	GO:0005737	6	cytoplasm	1.58753e-182	U5G2B5	Uncharacterized protein	POPTR_0010s17770g	ident	3.2	31.209	5.7739	1	1	1
Cellular Component	GO:0005737	6	cytoplasm	1.58753e-182	A9PHP7	Eukaryotic translation initiation factor 3 subunit K	POPTR_0006s13880g	ident	22.6	26.851	33.453	6	4	4
Cellular Component	GO:0005737	6	cytoplasm	1.58753e-182	B9HFT3	Cytochrome c oxidase subunit 6a, mitochondrial OS=Arabidopsis thaliana GN=COX6A PE=2 SV=1	POPTR_0007s14540g	ident	13.7	14.218	6.2338	1	1	1
Cellular Component	GO:0005737	6	cytoplasm	1.58753e-182	B9HH41	Asparagine--tRNA ligase, chloroplastic/mitochondrial OS=Arabidopsis thaliana GN=SYNO PE=2 SV=3	POPTR_0007s01840g	ident	13.7	64.805	36.435	7	7	2
Cellular Component	GO:0005737	6	cytoplasm	1.58753e-182	B9IIC4	60S ribosomal protein L21-2 OS=Arabidopsis thaliana GN=RPL21E PE=2 SV=1	POPTR_0016s06110g	ident	25.6	18.753	25.649	2	2	1
Cellular Component	GO:0005737	6	cytoplasm	1.58753e-182	B9H7R3	Cytochrome b-c1 complex subunit 6	POPTR_0005s21330g	ident	21.7	7.9962	9.8322	1	1	1
Cellular Component	GO:0005737	6	cytoplasm	1.58753e-182	B9H931	Pentatricopeptide repeat-containing protein At1g80270, mitochondrial OS=Arabidopsis thaliana GN=At1g80270 PE=2 SV=1	POPTR_0006s03790g	ident	5.5	70.321	17.647	2	2	2
Cellular Component	GO:0005737	6	cytoplasm	1.58753e-182	B9I3P1	Glycosyl transferase family 1 family protein	POPTR_0012s09750g	ident	3	53.077	7.8426	1	1	1
Cellular Component	GO:0005737	6	cytoplasm	1.58753e-182	B9NBT1	Probable UDP-arabinopyranose mutase 5 OS=Arabidopsis thaliana GN=RGP5 PE=1 SV=1	POPTR_0019s07850g	ident	20.2	38.883	30.963	5	6	5
Cellular Component	GO:0005737	6	cytoplasm	1.58753e-182	A9P8N5	Reticulon-like protein	POPTR_0014s08690g	ident	9.6	28.1	10.654	2	3	2
Cellular Component	GO:0005737	6	cytoplasm	1.58753e-182	B9GIY4	Succinate dehydrogenase [ubiquinone] iron-sulfur subunit, mitochondrial	POPTR_0001s36050g	ident	19.3	32.125	40.364	5	4	4
Cellular Component	GO:0005737	6	cytoplasm	1.58753e-182	B9GRP4	Ribophorin 2 family protein	POPTR_0002s03790g	ident	20.9	74.861	180.55	15	11	10
Cellular Component	GO:0005737	6	cytoplasm	1.58753e-182	B9IF23	Vignain OS=Phaseolus vulgaris PE=2 SV=2	POPTR_0015s09900g	ident	8.3	40.209	27.48	2	2	2
Cellular Component	GO:0005737	6	cytoplasm	1.58753e-182	A0A2K2BPC5	Chaperonin CPN60-2, mitochondrial OS=Cucurbita maxima GN=CPN60-2 PE=1 SV=1	POPTR_002G252900v3	ident	25.6	57.981	27.983	5	10	4
Cellular Component	GO:0005737	6	cytoplasm	1.58753e-182	A9PBK1	Emp24/gp25L/p24 family protein	POPTR_0008s09020g	ident	14.4	24.494	26.773	4	2	2
Cellular Component	GO:0005737	6	cytoplasm	1.58753e-182	A0A2K2C7C7	50S ribosomal protein L27, chloroplastic OS=Arabidopsis thaliana GN=RPL27 PE=2 SV=1	POPTR_001G329500v3	ident	20	14.868	20.577	3	3	3
Cellular Component	GO:0005737	6	cytoplasm	1.58753e-182	B9MXY5	Isocitrate lyase	POPTR_0017s06460g	ident	24.8	64.564	77.016	6	10	4
Cellular Component	GO:0005737	6	cytoplasm	1.58753e-182	B9HKP8	Argininosuccinate synthase, chloroplastic OS=Arabidopsis thaliana GN=At4g24830 PE=1 SV=3	POPTR_0008s02110g	ident	18.4	54.252	10.95	2	9	2
Cellular Component	GO:0005737	6	cytoplasm	1.58753e-182	B9GWZ6	Coatomer subunit beta'	POPTR_0003s05500g	ident	10.5	104.14	7.1645	2	9	1
Cellular Component	GO:0005737	6	cytoplasm	1.58753e-182	A0A2K1Z561	40S ribosomal protein S29 OS=Triticum aestivum GN=RPS29 PE=1 SV=1	POPTR_009G090000v3	ident	37.5	6.4304	13.574	3	2	2
Cellular Component	GO:0005737	6	cytoplasm	1.58753e-182	B9HSJ8	Ferritin	POPTR_0010s19190g	ident	45.8	29.459	138.11	22	10	7
Cellular Component	GO:0005737	6	cytoplasm	1.58753e-182	B9H0D3	Alpha-1,4 glucan phosphorylase	POPTR_0004s12240g	ident	10.5	112.07	57.642	8	9	7
Cellular Component	GO:0005737	6	cytoplasm	1.58753e-182	B9H5H2	AMP-dependent synthetase and ligase family protein	POPTR_0005s27210g	ident	14.5	60.543	36.268	6	6	6
Cellular Component	GO:0005737	6	cytoplasm	1.58753e-182	B9I0V9	Coatomer subunit epsilon	POPTR_0011s15930g	ident	17.2	32.178	35.563	5	4	4
Cellular Component	GO:0005737	6	cytoplasm	1.58753e-182	B9IJ66	Fructose-1,6-bisphosphatase, chloroplastic OS=Spinacia oleracea PE=1 SV=2	POPTR_0017s07040g	ident	9.7	43.993	20.249	3	3	3
Cellular Component	GO:0005737	6	cytoplasm	1.58753e-182	A0A2K2AT90	Vesicle transport v-SNARE 13 OS=Arabidopsis thaliana GN=VTI13 PE=2 SV=1	POPTR_004G115700v3	ident	18.7	18.819	14.622	2	2	1
Cellular Component	GO:0005737	6	cytoplasm	1.58753e-182	U5G2G4	Electron transfer flavoprotein subunit beta, mitochondrial OS=Arabidopsis thaliana GN=ETFB PE=1 SV=1	POPTR_0008s16570g	ident	9.2	27.317	12.198	1	2	2
Cellular Component	GO:0005737	6	cytoplasm	1.58753e-182	B9IIA5	Thioredoxin-like 5 mRNA family protein	POPTR_0016s05950g	ident	4.6	22.302	6.5441	1	1	1
Cellular Component	GO:0005737	6	cytoplasm	1.58753e-182	B9MZI5	O-acetylserine (Thiol)lyase family protein	POPTR_0005s04960g	ident	15.6	33.901	29.118	4	4	4
Cellular Component	GO:0005737	6	cytoplasm	1.58753e-182	A0A2K1ZEZ3	Galactokinase OS=Arabidopsis thaliana GN=GAL1 PE=1 SV=2	POPTR_008G102800v3	ident	25.1	50.343	116.16	14	8	8
Cellular Component	GO:0005737	6	cytoplasm	1.58753e-182	B9HWP4	Zinc finger family protein	POPTR_0010s14240g	ident	7.1	18.953	6.8429	1	1	1
Cellular Component	GO:0005737	6	cytoplasm	1.58753e-182	A0A2K2A437	60S ribosomal protein L11 OS=Medicago sativa GN=RPL11 PE=2 SV=1	POPTR_006G181500v3	ident	31.2	19.572	39.856	8	5	5
Cellular Component	GO:0005737	6	cytoplasm	1.58753e-182	B9HRL0	Glucose-1-phosphate adenylyltransferase	POPTR_0009s12140g	ident	12.1	58.606	30.198	5	6	4
Cellular Component	GO:0005737	6	cytoplasm	1.58753e-182	B9GPD6	Golgi SNAP receptor complex member 1	POPTR_0002s14610g	ident	8.8	26.833	13.74	2	2	1
Cellular Component	GO:0005737	6	cytoplasm	1.58753e-182	B9N8C8	Uncharacterized protein	POPTR_0004s00930g	ident	5.5	24.911	12.259	1	1	1
Cellular Component	GO:0005737	6	cytoplasm	1.58753e-182	A0A2K1XM94	40S ribosomal protein S13 OS=Glycine max GN=RPS13 PE=2 SV=1	POPTR_015G130000v3	ident	34.3	16.004	6.1825	1	4	1
Cellular Component	GO:0005737	6	cytoplasm	1.58753e-182	B9IBR6	Mitochondrial outer membrane protein porin 2 OS=Arabidopsis thaliana GN=VDAC2 PE=1 SV=1	POPTR_0014s01660g	ident	6.2	29.322	11.622	2	2	2
Cellular Component	GO:0005737	6	cytoplasm	1.58753e-182	B9GP17	30S ribosomal protein S9	POPTR_0002s13330g	ident	13.7	22.985	9.4764	2	2	1
Cellular Component	GO:0005737	6	cytoplasm	1.58753e-182	A9PCP8	Mitochondrial outer membrane protein porin of 34 kDa OS=Solanum tuberosum PE=1 SV=2	POPTR_0017s11430g	ident	28.1	29.125	88.719	9	7	7
Cellular Component	GO:0005737	6	cytoplasm	1.58753e-182	B9I056	FLAVODOXIN-LIKE QUINONE REDUCTASE 1 family protein	POPTR_0011s13310g	ident	29.1	21.673	48.619	11	6	5
Cellular Component	GO:0005737	6	cytoplasm	1.58753e-182	A9PDI1	AP47/50p mRNA family protein	POPTR_0003s08940g	ident	13.2	49.31	33.69	5	5	5
Cellular Component	GO:0005737	6	cytoplasm	1.58753e-182	B9I5Q6	Probable inactive ATP-dependent zinc metalloprotease FTSHI 5, chloroplastic OS=Arabidopsis thaliana GN=FTSHI5 PE=2 SV=1	POPTR_0013s04620g	ident	2.9	149.95	25.495	4	4	4
Cellular Component	GO:0005737	6	cytoplasm	1.58753e-182	B9IPT1	5-methyltetrahydropteroyltriglutamate--homocysteine methyltransferase family protein	POPTR_0019s05430g	ident	18.3	85.011	52.392	6	11	2
Cellular Component	GO:0005737	6	cytoplasm	1.58753e-182	B9GIK5	Probable methyltransferase PMT9 OS=Arabidopsis thaliana GN=At5g14430 PE=2 SV=1	POPTR_0001s35650g	ident	6.7	69.685	5.6927	1	4	1
Cellular Component	GO:0005737	6	cytoplasm	1.58753e-182	B9MW98	Putative beta-fructofuranosidase family protein	POPTR_0013s11520g	ident	7	63.529	17.967	3	3	3
Cellular Component	GO:0005737	6	cytoplasm	1.58753e-182	B9MU88	26S proteasome regulatory subunit family protein	POPTR_0001s01760g	ident	17.4	44.484	39.046	6	5	3
Cellular Component	GO:0005737	6	cytoplasm	1.58753e-182	U7E1P1	Calcium-dependent protein kinase 21 OS=Arabidopsis thaliana GN=CPK21 PE=1 SV=1	POPTR_0021s00750g	ident	6.6	59.927	24.739	3	3	1
Cellular Component	GO:0005737	6	cytoplasm	1.58753e-182	A0A2K2A6H0	Conserved oligomeric Golgi complex subunit 8	POPTR_006G225500v3	ident	3.9	57.023	13.837	2	2	2
Cellular Component	GO:0005737	6	cytoplasm	1.58753e-182	B9H3B7	60S ribosomal export protein NMD3	POPTR_0004s08410g	ident	10.8	56.64	31.611	5	5	5
Cellular Component	GO:0005737	6	cytoplasm	1.58753e-182	B9IAU7	Truncated acetyl Co-A acetyltransferase-like family protein	POPTR_0014s16670g	ident	27.9	41.121	111.13	11	9	9
Cellular Component	GO:0005737	6	cytoplasm	1.58753e-182	U5FZJ6	Uroporphyrinogen decarboxylase	POPTR_0011s11110g	ident	6.9	44.961	17.491	4	3	3
Cellular Component	GO:0005737	6	cytoplasm	1.58753e-182	A9PG47	26S proteasome subunit 8 family protein	POPTR_0010s10860g	ident	45.5	47.997	143.14	18	14	3
Cellular Component	GO:0005737	6	cytoplasm	1.58753e-182	B9GEW5	Transmembrane emp24 domain-containing protein p24delta3 OS=Arabidopsis thaliana GN=At1g09580 PE=1 SV=1	POPTR_0001s21840g	ident	13.5	23.874	14.167	3	2	2
Cellular Component	GO:0005737	6	cytoplasm	1.58753e-182	A9PI76	Rho GDP-dissociation inhibitor 1 OS=Arabidopsis thaliana GN=GDI1 PE=1 SV=1	POPTR_0002s26090g	ident	4.3	26.037	5.6119	0	1	1
Cellular Component	GO:0005737	6	cytoplasm	1.58753e-182	B9HQ95	Protein disulfide-isomerase	POPTR_0009s01920g	ident	13.7	65.193	50.17	11	8	8
Cellular Component	GO:0005737	6	cytoplasm	1.58753e-182	A9P9M5	Cytochrome b-c1 complex subunit 8 OS=Solanum tuberosum PE=1 SV=2	POPTR_019G132000v3	ident	19	7.1245	7.311	2	1	1
Cellular Component	GO:0005737	6	cytoplasm	1.58753e-182	B9HVY0	Diphosphomevalonate decarboxylase	POPTR_0010s24440g	ident	11.3	45.784	35.961	4	3	1
Cellular Component	GO:0005737	6	cytoplasm	1.58753e-182	A9PH67	Elongation factor 1-alpha	POPTR_0006s13310g	ident	32	49.308	45.21	16	12	1
Cellular Component	GO:0005737	6	cytoplasm	1.58753e-182	B9GRJ2	GTPase HflX OS=Escherichia coli (strain K12) GN=hflX PE=1 SV=3	POPTR_0002s03250g	ident	1.9	60.145	6.5559	1	1	1
Cellular Component	GO:0005737	6	cytoplasm	1.58753e-182	U5GCG2	2 family protein	POPTR_0006s11400g	ident	24.6	61.011	117.43	12	9	4
Cellular Component	GO:0005737	6	cytoplasm	1.58753e-182	B9HZJ0	Phospholipase/carboxylesterase family protein	POPTR_0011s00760g	ident	3.4	28.521	6.6208	1	1	1
Cellular Component	GO:0005737	6	cytoplasm	1.58753e-182	B9IG38	UNCOUPLING family protein	POPTR_0016s11740g	ident	25.4	32.664	43.661	8	6	4
Cellular Component	GO:0005737	6	cytoplasm	1.58753e-182	A9PGL4	40S ribosomal protein S19	POPTR_0017s12780g	ident	38.5	15.864	32.463	5	5	4
Cellular Component	GO:0005737	6	cytoplasm	1.58753e-182	A9PG07	Glycine cleavage system H protein	POPTR_0003s08760g	ident	21.2	17.801	26.425	4	3	3
Cellular Component	GO:0005737	6	cytoplasm	1.58753e-182	A9PI52	Protease Do-like 1, chloroplastic OS=Arabidopsis thaliana GN=DEGP1 PE=1 SV=2	POPTR_0001s34960g	ident	5.1	45.354	14.899	3	2	2
Cellular Component	GO:0005737	6	cytoplasm	1.58753e-182	B9IKM7	Proteasome subunit beta	POPTR_0018s00740g	ident	28.7	27.379	110.24	9	5	3
Cellular Component	GO:0005737	6	cytoplasm	1.58753e-182	B9H9C3	Beta-adaptin-like protein	POPTR_0006s25970g	ident	8.7	93.001	74.007	6	5	5
Cellular Component	GO:0005737	6	cytoplasm	1.58753e-182	B9IGD7	Diaminopimelate epimerase, chloroplastic OS=Arabidopsis thaliana GN=DAPF PE=1 SV=1	POPTR_0016s12850g	ident	10.7	39.168	25.632	5	3	3
Cellular Component	GO:0005737	6	cytoplasm	1.58753e-182	B9HFX9	4-alpha-glucanotransferase	POPTR_0007s06550g	ident	9.4	64.621	31.455	6	5	5
Cellular Component	GO:0005737	6	cytoplasm	1.58753e-182	B9I107	Chlorophyll a-b binding protein, chloroplastic	POPTR_0011s02770g	ident	9.8	28.053	6.2295	1	2	1
Cellular Component	GO:0005737	6	cytoplasm	1.58753e-182	B9H5P7	Dihydroorotate dehydrogenase (quinone), mitochondrial	POPTR_0005s09200g	ident	11.6	48.707	28.25	5	4	4
Cellular Component	GO:0005737	6	cytoplasm	1.58753e-182	B9I2Y8	Geranylgeranyl reductase family protein	POPTR_0012s07060g	ident	38.5	52.15	261.13	24	15	15
Cellular Component	GO:0005737	6	cytoplasm	1.58753e-182	A9P9H7	Vesicle transport v-SNARE 13 OS=Arabidopsis thaliana GN=VTI13 PE=2 SV=1	POPTR_0017s12360g	ident	22.7	24.862	33.854	6	3	2
Cellular Component	GO:0005737	6	cytoplasm	1.58753e-182	U5FFX4	Cytidine deaminase 1 family protein	POPTR_0018s07020g	ident	4.1	33.833	5.6819	1	1	1
Cellular Component	GO:0005737	6	cytoplasm	1.58753e-182	A4GYT6	ATP-dependent Clp protease proteolytic subunit	clpP	ident	20.4	22.04	19.112	3	3	3
Cellular Component	GO:0005737	6	cytoplasm	1.58753e-182	B9H3N1	NADH-ubiquinone oxidoreductase family protein	POPTR_0004s07040g	ident	31.6	19.418	56.407	5	4	4
Cellular Component	GO:0005737	6	cytoplasm	1.58753e-182	B9H8N0	Uncharacterized protein	POPTR_0005s24660g	ident	10.7	23.106	11.224	2	2	2
Cellular Component	GO:0005737	6	cytoplasm	1.58753e-182	B9INY9	T-complex protein 1 subunit gamma	POPTR_0019s00210g	ident	24.5	60.518	21.892	3	13	1
Cellular Component	GO:0005737	6	cytoplasm	1.58753e-182	A9PC56	40S ribosomal protein S11	POPTR_0002s14130g	ident	25.2	17.863	36.36	6	4	3
Cellular Component	GO:0005737	6	cytoplasm	1.58753e-182	B9I518	Pyruvate kinase	POPTR_0012s01140g	ident	17.2	63.709	98.943	8	6	6
Cellular Component	GO:0005737	6	cytoplasm	1.58753e-182	B9HS30	Polyadenylate-binding protein	POPTR_0009s10220g	ident	22.9	70.654	87.785	12	11	4
Cellular Component	GO:0005737	6	cytoplasm	1.58753e-182	B9IJ21	Adenylosuccinate synthetase, chloroplastic	PURA	ident	17.5	53.698	45.641	9	7	7
Cellular Component	GO:0005737	6	cytoplasm	1.58753e-182	B9I717	Importin subunit alpha	POPTR_0013s01220g	ident	12.1	58.241	12.061	1	4	1
Cellular Component	GO:0005737	6	cytoplasm	1.58753e-182	B9HBP3	Glycosyl transferase family 20 family protein	POPTR_0006s19000g	ident	1.1	96.951	5.7302	1	1	1
Cellular Component	GO:0005737	6	cytoplasm	1.58753e-182	A9PFQ2	Ribulose bisphosphate carboxylase/oxygenase activase 1, chloroplastic OS=Larrea tridentata GN=RCA1 PE=1 SV=1	POPTR_0008s05870g	ident	33.3	51.951	117.53	19	11	6
Cellular Component	GO:0005737	6	cytoplasm	1.58753e-182	B9N4N7	Importin subunit alpha	POPTR_0005s02030g	ident	16.4	58.23	57.032	3	5	2
Cellular Component	GO:0005737	6	cytoplasm	1.58753e-182	A0A2K1Z6E9	Phenylalanine--tRNA ligase alpha subunit, cytoplasmic OS=Arabidopsis thaliana GN=At4g39280 PE=2 SV=3	POPTR_009G116100v3	ident	7.6	55.986	6.3499	1	3	1
Cellular Component	GO:0005737	6	cytoplasm	1.58753e-182	A0A2K1YQW5	40S ribosomal protein S3a	POPTR_010G083200v3	ident	27.2	28.096	56.7	9	5	5
Cellular Component	GO:0005737	6	cytoplasm	1.58753e-182	A0A2K2AWW3	AP-2 complex subunit alpha	POPTR_004G189700v3	ident	9.1	101.63	52.138	7	7	7
Cellular Component	GO:0005737	6	cytoplasm	1.58753e-182	A9PHS9	Ribosomal protein L13a	POPTR_0017s08170g	ident	21.8	23.661	13.146	2	5	2
Cellular Component	GO:0005737	6	cytoplasm	1.58753e-182	B9H0R2	Phenylalanyl-tRNA synthetase alpha chain family protein	POPTR_0004s16240g	ident	8.7	56.615	27.421	4	4	2
Cellular Component	GO:0005737	6	cytoplasm	1.58753e-182	B9IN50	60S ribosomal protein L7-4 OS=Arabidopsis thaliana GN=RPL7D PE=2 SV=1	POPTR_0018s13700g	ident	33.3	33.34	86.281	4	8	1
Cellular Component	GO:0005737	6	cytoplasm	1.58753e-182	B9N3P4	NADH dehydrogenase (ubiquinone) complex I, assembly factor 6 OS=Bos taurus GN=NDUFAF6 PE=2 SV=1	POPTR_0001s07730g	ident	9	33.686	15.208	2	2	2
Cellular Component	GO:0005737	6	cytoplasm	1.58753e-182	B9HXL0	Alpha-1,4 glucan phosphorylase	POPTR_0010s16770g	ident	4.7	108.23	12.072	1	4	2
Cellular Component	GO:0005737	6	cytoplasm	1.58753e-182	U7E1Q7	Arogenate dehydratase	POPTR_0021s00590g	ident	5.5	44.174	11.95	2	2	2
Cellular Component	GO:0005737	6	cytoplasm	1.58753e-182	B9HSM2	Em-like protein GEA6	POPTR_0010s19440g	ident	14	10.107	8.0453	3	1	1
Cellular Component	GO:0005737	6	cytoplasm	1.58753e-182	B9H3J7	Zinc finger family protein	POPTR_0004s07410g	ident	10.7	55.685	28.38	5	4	4
Cellular Component	GO:0005737	6	cytoplasm	1.58753e-182	B9HCP8	NADH-cytochrome b5 reductase	POPTR_0006s23520g	ident	23.3	35.281	47.99	11	7	7
Cellular Component	GO:0005737	6	cytoplasm	1.58753e-182	B9HRJ2	Bifunctional phosphatase IMPL2, chloroplastic OS=Arabidopsis thaliana GN=HISN7 PE=1 SV=1	POPTR_0009s12340g	ident	4.1	37.673	6.6376	1	1	1
Cellular Component	GO:0005737	6	cytoplasm	1.58753e-182	B9GK77	Cys/Met metabolism pyridoxal-phosphate-dependent enzyme family protein	POPTR_0001s11350g	ident	2.2	49.26	6.373	1	1	1
Cellular Component	GO:0005737	6	cytoplasm	1.58753e-182	B9GK89	N6-adenosine-methyltransferase MT-A70-like OS=Arabidopsis thaliana GN=MTA PE=1 SV=2	POPTR_0001s11230g	ident	1.7	83.924	7.4496	1	1	1
Cellular Component	GO:0005737	6	cytoplasm	1.58753e-182	B9HW41	Cytosolic phosphoglucomutase family protein	POPTR_0010s11970g	ident	21.6	63.088	130.99	11	10	7
Cellular Component	GO:0005737	6	cytoplasm	1.58753e-182	U5FNT7	Glucan endo-1,3-beta-glucosidase, basic isoform OS=Prunus persica GN=GNS1 PE=3 SV=1	POPTR_0016s05780g	ident	26.6	35.756	56.933	9	6	5
Cellular Component	GO:0005737	6	cytoplasm	1.58753e-182	B9H617	Acetylornithine aminotransferase, mitochondrial OS=Alnus glutinosa GN=AG118 PE=2 SV=1	POPTR_0005s09860g	ident	9.8	50.721	20.684	3	3	3
Cellular Component	GO:0005737	6	cytoplasm	1.58753e-182	B9ILW9	Lysine--tRNA ligase	POPTR_0018s09760g	ident	11.5	67.826	14.715	2	5	2
Cellular Component	GO:0005737	6	cytoplasm	1.58753e-182	A0A2K1YLM0	Importin subunit alpha	POPTR_010G001400v3	ident	19.8	58.235	97.707	12	7	1
Cellular Component	GO:0005737	6	cytoplasm	1.58753e-182	B9I948	33 kDa ribonucleoprotein, chloroplastic OS=Nicotiana sylvestris PE=1 SV=1	POPTR_0014s10140g	ident	11.8	31.573	18.457	3	3	3
Cellular Component	GO:0005737	6	cytoplasm	1.58753e-182	A9PH44	Mg-protoporphyrin IX chelatase	POPTR_0004s05270g	ident	35	45.214	108.04	19	10	3
Cellular Component	GO:0005737	6	cytoplasm	1.58753e-182	A9P967	Mitochondrial dicarboxylate/tricarboxylate transporter DTC OS=Arabidopsis thaliana GN=DTC PE=1 SV=1	POPTR_0001s04170g	ident	26.8	31.983	56.281	10	7	4
Cellular Component	GO:0005737	6	cytoplasm	1.58753e-182	B9HUK6	Probable cysteine protease RD19D OS=Arabidopsis thaliana GN=RD19D PE=2 SV=1	POPTR_0010s23510g	ident	12.5	35.84	70.064	5	3	3
Cellular Component	GO:0005737	6	cytoplasm	1.58753e-182	B9I801	60S ribosomal protein L13	POPTR_0013s02860g	ident	15.5	23.773	6.8769	2	4	1
Cellular Component	GO:0005737	6	cytoplasm	1.58753e-182	A0A2K1YGZ3	Eukaryotic translation initiation factor 4E-1 OS=Zea mays PE=2 SV=1	POPTR_011G077200v3	ident	11	20.659	11.831	2	2	2
Cellular Component	GO:0005737	6	cytoplasm	1.58753e-182	B9IEK6	Coatomer subunit alpha	POPTR_0015s08110g	ident	26.8	136.52	271.21	34	26	8
Cellular Component	GO:0005737	6	cytoplasm	1.58753e-182	B9GTZ2	UDP-sugar pyrophosphorylase OS=Arabidopsis thaliana GN=USP PE=1 SV=1	POPTR_0002s07790g	ident	17.4	57.659	20.967	2	7	1
Cellular Component	GO:0005737	6	cytoplasm	1.58753e-182	B9I1L9	60S ribosomal protein L36	POPTR_0011s07390g	ident	10.9	12.446	6.9095	1	1	1
Cellular Component	GO:0005737	6	cytoplasm	1.58753e-182	B9I345	Coatomer subunit alpha	POPTR_0012s07650g	ident	22.5	136.9	24.152	3	22	4
Cellular Component	GO:0005737	6	cytoplasm	1.58753e-182	B9I8P1	50S ribosomal protein L5	POPTR_0014s08500g	ident	10.3	28.788	5.7136	1	2	1
Cellular Component	GO:0005737	6	cytoplasm	1.58753e-182	B9IB60	COP9 signalosome complex subunit 4 OS=Arabidopsis thaliana GN=CSN4 PE=1 SV=2	POPTR_0014s17920g	ident	14.9	45.345	40.329	5	5	5
Cellular Component	GO:0005737	6	cytoplasm	1.58753e-182	A0A2K2BZJ5	Coatomer subunit beta'	POPTR_001G179200v3	ident	9.9	103.04	12.32	2	8	2
Cellular Component	GO:0005737	6	cytoplasm	1.58753e-182	B9HT71	Ribosomal protein L33	POPTR_0010s20700g	ident	33.9	12.914	35.93	5	3	1
Cellular Component	GO:0005737	6	cytoplasm	1.58753e-182	A0A2K1ZTR0	Calreticulin-3 OS=Arabidopsis thaliana GN=CRT3 PE=1 SV=2	POPTR_007G131500v3	ident	13	45.313	26.06	4	4	4
Cellular Component	GO:0005737	6	cytoplasm	1.58753e-182	B9GGU0	Transport family protein	POPTR_0001s31490g	ident	11.4	85.897	11.226	1	6	1
Cellular Component	GO:0005737	6	cytoplasm	1.58753e-182	B9GQ78	Eukaryotic translation initiation factor 3 subunit C	POPTR_0002s01840g	ident	4.7	102.96	34.73	4	4	1
Cellular Component	GO:0005737	6	cytoplasm	1.58753e-182	A0A2K2AF57	3-dehydroquinate synthase, chloroplastic OS=Actinidia chinensis GN=DHQS PE=1 SV=2	POPTR_005G110900v3	ident	7	47.059	18.838	3	3	3
Cellular Component	GO:0005737	6	cytoplasm	1.58753e-182	A0A2K1XVE7	Tyrosine--tRNA ligase	POPTR_014G140400v3	ident	12.4	55.735	39.424	3	4	4
Cellular Component	GO:0005737	6	cytoplasm	1.58753e-182	B9GJ65	50S ribosomal protein L11, chloroplastic OS=Arabidopsis thaliana GN=RPL11 PE=2 SV=1	POPTR_0001s45510g	ident	20	24.321	26.793	5	4	1
Cellular Component	GO:0005737	6	cytoplasm	1.58753e-182	B9GFH9	Mitochondrial phosphate transporter family protein	POPTR_0001s32950g	ident	13.1	38.989	25.92	4	4	2
Cellular Component	GO:0005737	6	cytoplasm	1.58753e-182	B9HR05	Chaos family protein	POPTR_0009s14260g	ident	10.3	42.248	16.405	3	3	3
Cellular Component	GO:0005737	6	cytoplasm	1.58753e-182	B9GFG9	Translocon-associated protein beta	POPTR_0001s33070g	ident	12.8	21.196	5.8706	1	1	1
Cellular Component	GO:0005737	6	cytoplasm	1.58753e-182	B9GIJ5	Vesicle tethering family protein	POPTR_0001s35520g	ident	12.7	101.22	65.244	8	8	8
Cellular Component	GO:0005737	6	cytoplasm	1.58753e-182	U5GGS9	Uridylate kinase OS=Trichodesmium erythraeum (strain IMS101) GN=pyrH PE=3 SV=1	POPTR_0005s05900g	ident	3.9	35.422	7.7781	2	1	1
Cellular Component	GO:0005737	6	cytoplasm	1.58753e-182	B9GJH3	Cell division family protein	POPTR_0001s37020g	ident	16.6	42.887	112.96	4	4	4
Cellular Component	GO:0005737	6	cytoplasm	1.58753e-182	A0A2K2CDT8	Thioredoxin reductase	POPTR_001G456800v3	ident	24.1	39.583	81.012	10	8	8
Cellular Component	GO:0005737	6	cytoplasm	1.58753e-182	A0A2K2BGR5	AP-4 complex subunit mu OS=Arabidopsis thaliana GN=AP4M PE=2 SV=1	POPTR_002G105100v3	ident	26.7	50.214	91.974	10	10	10
Cellular Component	GO:0005737	6	cytoplasm	1.58753e-182	A9PCU0	60S ribosomal protein L22-2 OS=Arabidopsis thaliana GN=RPL22B PE=2 SV=1	POPTR_0005s02430g	ident	39.5	14.086	62.366	6	5	1
Cellular Component	GO:0005737	6	cytoplasm	1.58753e-182	A9PG32	Thioredoxin m family protein	POPTR_0005s05980g	ident	22.5	19.507	55.253	8	3	3
Cellular Component	GO:0005737	6	cytoplasm	1.58753e-182	A9PH95	30S ribosomal protein S5, chloroplastic OS=Arabidopsis thaliana GN=rps5 PE=2 SV=1	POPTR_0004s04550g	ident	13.2	33.993	35.013	8	4	4
Cellular Component	GO:0005737	6	cytoplasm	1.58753e-182	A4GYQ9	Photosystem I P700 chlorophyll a apoprotein A2	psaB	ident	4.4	82.417	18.966	4	3	3
Cellular Component	GO:0005737	6	cytoplasm	1.58753e-182	B9GHI0	VARICOSE family protein	POPTR_0001s47350g	ident	2.7	149.1	12.955	3	3	2
Cellular Component	GO:0005737	6	cytoplasm	1.58753e-182	U5FVT4	Mg-protoporphyrin IX chelatase	POPTR_0011s07720g	ident	31.9	35.872	6.1912	1	8	1
Cellular Component	GO:0005737	6	cytoplasm	1.58753e-182	A9PD52	Sm-like protein LSM2	POPTR_0003s01050g	ident	14	10.707	6.1494	1	1	1
Cellular Component	GO:0005737	6	cytoplasm	1.58753e-182	B9I0J7	Uncharacterized protein	POPTR_0011s14710g	ident	2	81.659	10.878	2	2	2
Cellular Component	GO:0005737	6	cytoplasm	1.58753e-182	U5GS62	Vacuolar-processing enzyme OS=Ricinus communis PE=1 SV=1	POPTR_0001s07720g	ident	20	18.319	7.2606	1	2	1
Cellular Component	GO:0005737	6	cytoplasm	1.58753e-182	A0A2K1ZZ72	40S ribosomal protein S7	POPTR_006G087900v3	ident	40.3	17.866	66.571	11	6	2
Cellular Component	GO:0005737	6	cytoplasm	1.58753e-182	A9P919	Dehydration-responsive family protein	POPTR_0006s04210g	ident	1.7	68.358	5.9265	1	1	1
Cellular Component	GO:0005737	6	cytoplasm	1.58753e-182	A0A2K1WWB4	Uncharacterized protein	POPTR_018G055600v3	ident	8	9.9045	5.6288	2	1	1
Cellular Component	GO:0005737	6	cytoplasm	1.58753e-182	A0A2K1Y490	50S ribosomal protein L21, chloroplastic OS=Arabidopsis thaliana GN=RPL21 PE=2 SV=1	POPTR_013G112900v3	ident	11	24.931	17.047	2	2	2
Cellular Component	GO:0005737	6	cytoplasm	1.58753e-182	U5FLY8	T-complex protein 1 subunit zeta 1 OS=Arabidopsis thaliana GN=CCT6A PE=1 SV=1	POPTR_0017s13810g	ident	33.4	46.107	147.62	15	11	2
Cellular Component	GO:0005737	6	cytoplasm	1.58753e-182	B9I3Q0	Translational elongation factor 1 subunit Bbeta family protein	POPTR_0012s09840g	ident	27.7	25.196	51.468	7	6	4
Cellular Component	GO:0005737	6	cytoplasm	1.58753e-182	A0A2K2C4F0	60S ribosomal protein L6 OS=Mesembryanthemum crystallinum GN=RPL6 PE=2 SV=1	POPTR_001G271500v3	ident	3.8	23.761	5.7519	2	1	1
Cellular Component	GO:0005737	6	cytoplasm	1.58753e-182	B9GHA6	Translation factor GUF1 homolog, chloroplastic	POPTRDRAFT_815670	ident	4.7	75.999	21.455	3	3	3
Cellular Component	GO:0005737	6	cytoplasm	1.58753e-182	U5GVA8	Alpha-mannosidase	POPTR_0001s34770g	ident	8.8	97.697	53.917	6	6	6
Cellular Component	GO:0005737	6	cytoplasm	1.58753e-182	B9HV14	Vacuolar ATP synthase catalytic subunit A family protein	POPTR_0010s26000g	ident	34.3	68.7	159.5	26	17	3
Cellular Component	GO:0005737	6	cytoplasm	1.58753e-182	B9HK35	Vacuolar ATP synthase catalytic subunit A family protein	POPTR_0008s00560g	ident	33.2	68.619	23.896	4	16	2
Cellular Component	GO:0005737	6	cytoplasm	1.58753e-182	A9P8R8	Protein transport protein Sec61 subunit beta	POPTR_0009s01720g	ident	23.6	10.579	6.6138	1	1	1
Cellular Component	GO:0005737	6	cytoplasm	1.58753e-182	B9GQA5	Cysteine synthase	POPTR_0002s16220g	ident	13.1	40.494	12.567	3	4	2
Cellular Component	GO:0005737	6	cytoplasm	1.58753e-182	B9I705	GTP-binding protein SAR1A OS=Arabidopsis thaliana GN=SAR1A PE=2 SV=1	POPTR_0013s01120g	ident	35.4	21.883	33.682	5	5	2
Cellular Component	GO:0005737	6	cytoplasm	1.58753e-182	U5GPB7	Threonine synthase, chloroplastic OS=Solanum tuberosum PE=2 SV=1	POPTR_0003s02770g	ident	17.9	56.852	13.049	2	6	2
Cellular Component	GO:0005737	6	cytoplasm	1.58753e-182	B9GEP6	Strictosidine synthase family protein	POPTR_0001s22160g	ident	11	44.042	37.969	3	3	3
Cellular Component	GO:0005737	6	cytoplasm	1.58753e-182	B9ILJ3	Rev interacting-like family protein	POPTR_0018s06170g	ident	4	70.906	17.921	2	2	2
Cellular Component	GO:0005737	6	cytoplasm	1.58753e-182	B9HZV8	Thioredoxin M-type 4 family protein	POPTR_0011s12120g	ident	23.2	20.626	29.085	4	4	2
Cellular Component	GO:0005737	6	cytoplasm	1.58753e-182	B9IM03	VDAC3.1 family protein	POPTR_0018s10180g	ident	9.8	29.534	16.668	2	2	2
Cellular Component	GO:0005737	6	cytoplasm	1.58753e-182	B9HUJ0	Glycerol-3-phosphate dehydrogenase	POPTR_0010s23350g	ident	19.7	68.58	70.539	11	11	11
Cellular Component	GO:0005737	6	cytoplasm	1.58753e-182	U5GPA2	50S ribosomal protein L31 (Fragment)	POPTR_0002s03470g	ident	35.4	10.686	22.333	2	2	2
Cellular Component	GO:0005737	6	cytoplasm	1.58753e-182	B9H0P9	Coatomer subunit gamma	POPTR_0004s16090g	ident	14.6	98.519	85.64	8	9	4
Cellular Component	GO:0005737	6	cytoplasm	1.58753e-182	B9HBL6	Aspartyl-tRNA synthetase family protein	POPTR_0006s08550g	ident	29	61.152	105.3	18	14	14
Cellular Component	GO:0005737	6	cytoplasm	1.58753e-182	B9H462	FAD-dependent oxidoreductase family protein	POPTR_0005s06180g	ident	2.2	44.198	6.1034	1	1	1
Cellular Component	GO:0005737	6	cytoplasm	1.58753e-182	B9HQN9	DNA ligase	POPTR_0009s01140g	ident	2.5	49.962	5.6136	1	1	1
Cellular Component	GO:0005737	6	cytoplasm	1.58753e-182	A9PA30	Cysteine synthase	POPTR_0030s00390g	ident	28.6	34.227	70.469	11	8	8
Cellular Component	GO:0005737	6	cytoplasm	1.58753e-182	B9HG84	Uncharacterized protein	POPTR_0007s15300g	ident	6	48.782	15.572	2	2	2
Cellular Component	GO:0005737	6	cytoplasm	1.58753e-182	B9I241	Probable 6-phosphogluconolactonase 5, chloroplastic OS=Arabidopsis thaliana GN=EMB2024 PE=2 SV=1	POPTR_0012s03150g	ident	13.4	34.823	26.067	4	4	2
Cellular Component	GO:0005737	6	cytoplasm	1.58753e-182	B9GQP4	60S ribosomal protein L32-1 OS=Arabidopsis thaliana GN=RPL32A PE=2 SV=2	POPTR_0002s25050g	ident	30.8	15.586	8.8741	3	3	1
Cellular Component	GO:0005737	6	cytoplasm	1.58753e-182	B9I1A3	NLI interacting factor family protein	POPTR_0011s09550g	ident	3.6	41.549	7.5171	1	1	1
Cellular Component	GO:0005737	6	cytoplasm	1.58753e-182	A9PEQ6	Formate dehydrogenase, mitochondrial	POPTR_0014s15960g	ident	30	42.388	91.637	16	8	8
Cellular Component	GO:0005737	6	cytoplasm	1.58753e-182	A9PG38	Elongation factor 1-alpha	POPTR_0010s22570g	ident	34.1	49.434	40.112	8	12	2
Cellular Component	GO:0005737	6	cytoplasm	1.58753e-182	B9HV08	Ribosomal family protein	POPTR_0010s26060g	ident	12.2	15.97	12.403	2	2	2
Cellular Component	GO:0005737	6	cytoplasm	1.58753e-182	U5GPE9	Beta-galactosidase	POPTR_0003s03060g	ident	4.4	93.492	22.828	3	3	2
Cellular Component	GO:0005737	6	cytoplasm	1.58753e-182	B9HG08	Organellar oligopeptidase A, chloroplastic/mitochondrial OS=Arabidopsis thaliana GN=OOP PE=1 SV=1	POPTR_0007s14960g	ident	12.8	79.216	19.951	2	7	2
Cellular Component	GO:0005737	6	cytoplasm	1.58753e-182	B9MWE6	Phenylalanyl-tRNA synthetase class IIc family protein	POPTR_0013s10990g	ident	10.6	48.966	23.874	3	3	3
Cellular Component	GO:0005737	6	cytoplasm	1.58753e-182	A0A2K1Z3R0	ADP,ATP carrier protein 1, mitochondrial OS=Gossypium hirsutum GN=ANT1 PE=2 SV=1	POPTR_009G062200v3	ident	22.2	41.086	62.524	16	8	4
Cellular Component	GO:0005737	6	cytoplasm	1.58753e-182	B9I5G4	Prefoldin subunit 4	POPTR_0013s03940g	ident	14.3	14.627	20.754	2	2	2
Cellular Component	GO:0005737	6	cytoplasm	1.58753e-182	B9MUD1	60S ribosomal protein L13	POPTR_0001s01350g	ident	27.1	23.812	133.05	8	5	2
Cellular Component	GO:0005737	6	cytoplasm	1.58753e-182	B9N1A4	Threonine synthase, chloroplastic OS=Solanum tuberosum PE=2 SV=1	POPTR_0001s20630g	ident	17.9	56.844	53.114	10	8	4
Cellular Component	GO:0005737	6	cytoplasm	1.58753e-182	A9PHV3	Superoxide dismutase [Cu-Zn]	POPTR_0013s03160g	ident	7.9	15.21	7.6579	1	1	1
Cellular Component	GO:0005737	6	cytoplasm	1.58753e-182	B9GS73	NADH-ubiquinone oxidoreductase 24 kDa subunit family protein	POPTR_0002s04610g	ident	17.3	28.277	31.964	7	5	5
Cellular Component	GO:0005737	6	cytoplasm	1.58753e-182	A9PF94	Sedoheptulose-1 family protein	POPTR_0010s20060g	ident	19.9	42.439	64.844	7	6	3
Cellular Component	GO:0005737	6	cytoplasm	1.58753e-182	B9GJV7	Fimbrin-1 OS=Arabidopsis thaliana GN=FIM1 PE=1 SV=2	POPTR_0001s37110g	ident	1.7	76.915	7.1838	1	1	1
Cellular Component	GO:0005737	6	cytoplasm	1.58753e-182	A9PC19	40S ribosomal protein S15a OS=Daucus carota GN=RPS15A PE=2 SV=3	POPTR_0008s05190g	ident	44.6	14.854	38.398	5	5	5
Cellular Component	GO:0005737	6	cytoplasm	1.58753e-182	B9GSG0	Phosphoribosylformylglycinamidine cyclo-ligase, chloroplastic/mitochondrial OS=Vigna unguiculata GN=PUR5 PE=2 SV=1	POPTR_0002s19970g	ident	10.4	41.659	28.6	5	4	4
Cellular Component	GO:0005737	6	cytoplasm	1.58753e-182	A9PC01	NADH2 dehydrogenase family protein	POPTR_0012s05350g	ident	29	12.613	29.023	6	3	2
Cellular Component	GO:0005737	6	cytoplasm	1.58753e-182	B9GFJ3	Adenosylhomocysteinase	POPTR_0001s32780g	ident	30.9	53.434	184.19	23	14	5
Cellular Component	GO:0005737	6	cytoplasm	1.58753e-182	A0A2K1ZIR2	60S ribosomal protein L23 OS=Arabidopsis thaliana GN=RPL23A PE=2 SV=3	POPTR_008G171200v3	ident	49.6	13.424	81.631	10	5	5
Cellular Component	GO:0005737	6	cytoplasm	1.58753e-182	A0A2K2BLS5	Fumarate hydratase 1, mitochondrial OS=Arabidopsis thaliana GN=FUM1 PE=1 SV=2	POPTR_002G201300v3	ident	9	49.867	25.366	4	4	4
Cellular Component	GO:0005737	6	cytoplasm	1.58753e-182	B9GJU0	Mitochondrial import receptor subunit TOM20 OS=Solanum tuberosum GN=TOM20 PE=1 SV=1	POPTR_0001s33780g	ident	20.4	22.754	39.987	4	3	3
Cellular Component	GO:0005737	6	cytoplasm	1.58753e-182	A9PGB1	Chain D family protein	POPTR_0016s11610g	ident	17.4	44.973	46.263	6	5	5
Cellular Component	GO:0005737	6	cytoplasm	1.58753e-182	B9HUT6	Proteasome subunit beta type	POPTR_0010s09490g	ident	24.4	23.112	32.001	5	5	1
Cellular Component	GO:0005737	6	cytoplasm	1.58753e-182	A9PIA2	Adenosylhomocysteinase	POPTR_0017s08610g	ident	18.4	53.198	6.0051	1	10	1
Cellular Component	GO:0005737	6	cytoplasm	1.58753e-182	A4GYP8	DNA-directed RNA polymerase subunit beta''	rpoC2	ident	7.8	158.14	109.54	9	9	9
Cellular Component	GO:0005737	6	cytoplasm	1.58753e-182	B9HKU1	Eukaryotic translation initiation factor 4E isoform family protein	POPTR_0008s17100g	ident	22.2	23.194	42.113	4	4	3
Cellular Component	GO:0005737	6	cytoplasm	1.58753e-182	B9HXS9	MULTIFUNCTIONAL family protein	POPTR_0010s01570g	ident	30.4	79.57	192.65	25	16	10
Cellular Component	GO:0005737	6	cytoplasm	1.58753e-182	A9PE04	Prefoldin subunit 4	POPTR_0005s05620g	ident	23.8	14.54	19.739	3	3	3
Cellular Component	GO:0005737	6	cytoplasm	1.58753e-182	A9PD80	Mitochondrial import inner membrane translocase subunit Tim9 family protein	POPTR_0012s03620g	ident	46.3	11.009	27.734	5	4	4
Cellular Component	GO:0005737	6	cytoplasm	1.58753e-182	U5GMZ2	Uncharacterized protein	POPTR_0004s21720g	ident	7.5	42.288	21.31	3	3	3
Cellular Component	GO:0005737	6	cytoplasm	1.58753e-182	B9GNG2	Alpha-mannosidase	POPTR_0002s23920g	ident	6	114.84	37.377	5	5	4
Cellular Component	GO:0005737	6	cytoplasm	1.58753e-182	U5G9M2	Uracil phosphoribosyltransferase OS=Nicotiana tabacum GN=UPP PE=2 SV=1	POPTR_0006s09200g	ident	27.2	32.714	46.56	7	6	6
Cellular Component	GO:0005737	6	cytoplasm	1.58753e-182	A0A2K1XZ41	Calreticulin OS=Ricinus communis PE=2 SV=1	POPTR_013G009500v3	ident	14.2	41.458	25.301	4	4	2
Cellular Component	GO:0005737	6	cytoplasm	1.58753e-182	B9HB29	1-acyl-sn-glycerol-3-phosphate acyltransferase 1, chloroplastic OS=Arabidopsis thaliana GN=LPAT1 PE=2 SV=1	POPTR_0006s19730g	ident	5.5	40.271	6.33	1	1	1
Cellular Component	GO:0005737	6	cytoplasm	1.58753e-182	A9P8U9	Mitochondrial import inner membrane translocase subunit Tim13 family protein	POPTR_0011s15280g	ident	58.4	9.7298	71.548	5	4	3
Cellular Component	GO:0005737	6	cytoplasm	1.58753e-182	U5GAZ5	Syntaxin-32 OS=Arabidopsis thaliana GN=SYP32 PE=2 SV=1	POPTR_0006s160901g	ident	10.4	24.121	40.487	1	1	1
Cellular Component	GO:0005737	6	cytoplasm	1.58753e-182	U5G913	Uncharacterized protein	POPTR_0006s29550g	ident	6.5	44.316	12.211	2	2	2
Cellular Component	GO:0005737	6	cytoplasm	1.58753e-182	B9N7I3	Proteasome subunit alpha type	POPTR_0001s16310g	ident	36.7	26.031	51.833	8	7	2
Cellular Component	GO:0005737	6	cytoplasm	1.58753e-182	U5GUH6	Tryptophan synthase	POPTR_0001s44620g	ident	13.8	52.068	9.2589	1	6	1
Cellular Component	GO:0005737	6	cytoplasm	1.58753e-182	U5FPG9	Reticulon-like protein	POPTR_0015s05710g	ident	10.4	21.611	7.9801	2	2	1
Cellular Component	GO:0005737	6	cytoplasm	1.58753e-182	A0A2K1YEM0	Mitochondrial pyruvate carrier	POPTR_011G023100v3	ident	50.9	6.4484	13.059	2	2	2
Cellular Component	GO:0005737	6	cytoplasm	1.58753e-182	B9HGK9	Porphobilinogen deaminase, chloroplastic OS=Pisum sativum GN=HEMC PE=1 SV=1	POPTR_0007s07680g	ident	27.9	40.502	121.23	15	10	4
Cellular Component	GO:0005737	6	cytoplasm	1.58753e-182	B9N0S6	Beta-galactosidase	POPTR_0017s08470g	ident	17.2	99.877	94.094	16	12	12
Cellular Component	GO:0005737	6	cytoplasm	1.58753e-182	A0A2K2BIM1	60S ribosomal protein L37a OS=Gossypium hirsutum GN=RPL37A PE=3 SV=1	POPTR_002G140100v3	ident	25	7.1202	7.2194	1	1	1
Cellular Component	GO:0005737	6	cytoplasm	1.58753e-182	B9HYS8	Probable NAD(P)H dehydrogenase (quinone) FQR1-like 1 OS=Arabidopsis thaliana GN=At4g27270 PE=1 SV=1	POPTR_0011s03570g	ident	40.4	21.693	85.968	7	5	3
Cellular Component	GO:0005737	6	cytoplasm	1.58753e-182	B9GP45	Ras-related GTP-binding family protein	POPTR_0002s13650g	ident	16.3	23.087	28.427	5	3	3
Cellular Component	GO:0005737	6	cytoplasm	1.58753e-182	A4GYV4	Protein Ycf2	ycf2-1	ident	2.7	268.33	39.167	6	6	6
Cellular Component	GO:0005737	6	cytoplasm	1.58753e-182	B9HGF9	Thioredoxin X, chloroplastic OS=Arabidopsis thaliana GN=ATHX PE=2 SV=2	POPTR_0007s07520g	ident	8.7	20.108	35.559	2	1	1
Cellular Component	GO:0005737	6	cytoplasm	1.58753e-182	U5G560	Elongation factor 1-alpha	POPTR_0010s22560g	ident	35.2	49.434	64.627	14	13	3
Cellular Component	GO:0005737	6	cytoplasm	1.58753e-182	A9PBF7	60S ribosomal protein L18a	POPTR_0011s06730g	ident	27.5	21.331	43.621	6	6	6
Cellular Component	GO:0005737	6	cytoplasm	1.58753e-182	B9GZG6	Beta-hydroxyacyl-ACP dehydratase family protein	POPTR_0003s01470g	ident	24.5	25.839	32.624	7	5	5
Cellular Component	GO:0005737	6	cytoplasm	1.58753e-182	A9PI53	Phosphomannomutase	POPTR_0014s07630g	ident	16.3	27.87	20.19	3	3	3
Cellular Component	GO:0005737	6	cytoplasm	1.58753e-182	U5G5W8	Enolase family protein	POPTR_0009s04540g	ident	14.3	51.812	39.92	6	5	5
Cellular Component	GO:0005737	6	cytoplasm	1.58753e-182	B9N401	Glutamate--tRNA ligase, cytoplasmic OS=Arabidopsis thaliana GN=At5g26710 PE=1 SV=1	POPTR_0005s00300g	ident	11.3	82.532	69.845	8	7	7
Cellular Component	GO:0005737	6	cytoplasm	1.58753e-182	B9IGY9	Phosphoglycerate mutase family protein	POPTR_0016s14950g	ident	22	61.181	28.737	5	9	4
Cellular Component	GO:0005737	6	cytoplasm	1.58753e-182	B9I6Z6	Lon protease homolog, mitochondrial	POPTR_0013s01030g	ident	9.6	107	47.638	7	7	7
Cellular Component	GO:0005737	6	cytoplasm	1.58753e-182	A9PI12	Thioredoxin f family protein	POPTR_0019s08240g	ident	13.3	20.452	13.285	2	2	2
Cellular Component	GO:0005737	6	cytoplasm	1.58753e-182	B9GTU7	Plant UBX domain-containing protein 5 OS=Arabidopsis thaliana GN=PUX5 PE=1 SV=1	POPTR_0002s21600g	ident	11	46.296	22.002	1	3	2
Cellular Component	GO:0005737	6	cytoplasm	1.58753e-182	B9GGY3	Persulfide dioxygenase ETHE1 homolog, mitochondrial OS=Arabidopsis thaliana GN=GLY3 PE=1 SV=3	POPTR_0001s38910g	ident	17	31.03	25.708	5	4	2
Cellular Component	GO:0005737	6	cytoplasm	1.58753e-182	B9MUW0	Phospho-2-dehydro-3-deoxyheptonate aldolase	POPTR_0001s15050g	ident	14.9	57.242	44.358	9	6	6
Cellular Component	GO:0005737	6	cytoplasm	1.58753e-182	B9I7N9	Protein LUTEIN DEFICIENT 5, chloroplastic OS=Arabidopsis thaliana GN=CYP97A3 PE=1 SV=1	POPTR_0013s08610g	ident	1.7	52.408	5.789	1	1	1
Cellular Component	GO:0005737	6	cytoplasm	1.58753e-182	B9N2T5	Lon protease homolog 2, peroxisomal	POPTR_0003s08420g	ident	3.4	98.633	16.243	3	3	3
Cellular Component	GO:0005737	6	cytoplasm	1.58753e-182	A9PB37	60S ribosomal protein L13a-2	POPTR_0001s32170g	ident	28.6	23.62	47.123	13	7	4
Cellular Component	GO:0005737	6	cytoplasm	1.58753e-182	U5GRM3	10 kDa chaperonin, mitochondrial OS=Arabidopsis thaliana GN=CPN10 PE=1 SV=1	POPTR_0001s28090g	ident	23.2	8.8093	13.057	2	2	2
Cellular Component	GO:0005737	6	cytoplasm	1.58753e-182	B9HAL7	39S ribosomal protein L41-A, mitochondrial OS=Xenopus laevis GN=mrpl41-a PE=2 SV=1	POPTR_0006s07000g	ident	14.1	10.287	5.636	1	1	1
Cellular Component	GO:0005737	6	cytoplasm	1.58753e-182	B9GWG9	Tubulin beta chain	POPTR_0003s12540g	ident	16.6	50.091	15.134	1	7	0
Cellular Component	GO:0005737	6	cytoplasm	1.58753e-182	B9GWT9	Beta-adaptin-like protein	POPTR_0003s13040g	ident	6.3	100.18	30.07	5	5	5
Cellular Component	GO:0005737	6	cytoplasm	1.58753e-182	U5FPJ0	ATP-dependent RNA helicase family protein	POPTR_0015s05960g	ident	1.7	134.31	11.507	2	2	2
Cellular Component	GO:0005737	6	cytoplasm	1.58753e-182	B9IGG0	Importin subunit beta-1 OS=Arabidopsis thaliana GN=KPNB1 PE=1 SV=1	POPTR_0016s13160g	ident	6.4	96.662	31.824	5	5	5
Cellular Component	GO:0005737	6	cytoplasm	1.58753e-182	B9H5I0	Catalase	POPTR_0005s27300g	ident	40.7	56.755	231.93	31	16	8
Cellular Component	GO:0005737	6	cytoplasm	1.58753e-182	A9PG09	Calcium load-activated calcium channel	POPTR_0016s06030g	ident	5.7	21.213	6.7367	1	1	1
Cellular Component	GO:0005737	6	cytoplasm	1.58753e-182	B9MUK8	26S protease regulatory subunit 7 family protein	POPTR_0001s16180g	ident	29.2	47.647	6.7098	1	10	1
Cellular Component	GO:0005737	6	cytoplasm	1.58753e-182	A0A2K1ZNH7	Dolichyl-diphosphooligosaccharide--protein glycosyltransferase 48 kDa subunit	POPTR_007G031000v3	ident	14.2	44.963	63.169	8	6	3
Cellular Component	GO:0005737	6	cytoplasm	1.58753e-182	A0A2K1YC34	Calnexin homolog 1 OS=Arabidopsis thaliana GN=CNX1 PE=1 SV=1	POPTR_012G111100v3	ident	16.6	60.861	23.232	6	8	3
Cellular Component	GO:0005737	6	cytoplasm	1.58753e-182	U5FZ59	Cell differentiation protein RCD1 homolog OS=Pongo abelii GN=RQCD1 PE=2 SV=2	POPTR_0011s08710g	ident	7	14.393	6.1031	1	1	1
Cellular Component	GO:0005737	6	cytoplasm	1.58753e-182	B9H3H2	Uncharacterized membrane protein YjcL OS=Bacillus subtilis (strain 168) GN=yjcL PE=4 SV=1	POPTR_0004s07750g	ident	1.8	47.187	5.6624	1	1	1
Cellular Component	GO:0005737	6	cytoplasm	1.58753e-182	B9IA25	FtsH-like protein Pftf	POPTR_0014s13560g	ident	18.5	74.157	106.94	15	12	5
Cellular Component	GO:0005737	6	cytoplasm	1.58753e-182	U5GHY0	UTP--glucose-1-phosphate uridylyltransferase	POPTR_0004s07280g	ident	38.4	51.757	170.71	20	14	4
Cellular Component	GO:0005737	6	cytoplasm	1.58753e-182	U5G3E4	Mg-protoporphyrin IX chelatase	POPTR_0009s05400g	ident	15.7	83.466	111.65	13	10	10
Cellular Component	GO:0005737	6	cytoplasm	1.58753e-182	A9PA93	26S proteasome non-ATPase regulatory subunit family protein	POPTR_0001s10940g	ident	24.7	30.575	20.9	3	5	3
Cellular Component	GO:0005737	6	cytoplasm	1.58753e-182	B9N466	Golgi apparatus membrane protein TVP23	POPTR_0005s01380g	ident	7.7	20.785	14.243	1	2	2
Cellular Component	GO:0005737	6	cytoplasm	1.58753e-182	U5FRN5	40S ribosomal protein S5-2 OS=Arabidopsis thaliana GN=RPS5B PE=1 SV=2	POPTR_0013s05290g	ident	11.7	16.179	11.277	2	2	2
Cellular Component	GO:0005737	6	cytoplasm	1.58753e-182	B9HFE2	GTP-BINDING protein 3	POPTR_0007s05120g	ident	4.9	24.558	5.8989	1	1	1
Cellular Component	GO:0005737	6	cytoplasm	1.58753e-182	U5FX61	Signal recognition particle subunit SRP68 OS=Canis lupus familiaris GN=SRP68 PE=1 SV=1	POPTR_0012s10800g	ident	5.5	51.492	6.5188	1	2	1
Cellular Component	GO:0005737	6	cytoplasm	1.58753e-182	B9GNJ9	Desumoylating isopeptidase 1 OS=Homo sapiens GN=DESI1 PE=1 SV=1	POPTR_0002s24310g	ident	4.9	30.473	6.7268	1	1	1
Cellular Component	GO:0005737	6	cytoplasm	1.58753e-182	A9PGL6	Cysteine synthase	POPTR_0014s08210g	ident	13.1	40.311	30.982	6	4	2
Cellular Component	GO:0005737	6	cytoplasm	1.58753e-182	U5G7Y6	VDAC2.1 family protein	POPTR_0007s09780g	ident	18.5	29.397	17.524	3	6	3
Cellular Component	GO:0005737	6	cytoplasm	1.58753e-182	U5GXN9	Ribosomal protein S14 mitochondrial (Fragment)	POPTR_0001s44850g	ident	7.4	18.877	7.4455	1	1	1
Cellular Component	GO:0005737	6	cytoplasm	1.58753e-182	A9PEX7	Thiamine thiazole synthase, chloroplastic	THI1	ident	6.7	37.882	14.721	2	2	2
Cellular Component	GO:0005737	6	cytoplasm	1.58753e-182	B9HSW1	Haloacid dehalogenase-like hydrolase domain-containing protein At2g33255 OS=Arabidopsis thaliana GN=At2g33255 PE=1 SV=1	POPTR_0010s07420g	ident	4.5	28.108	6.2981	1	1	1
Cellular Component	GO:0005737	6	cytoplasm	1.58753e-182	B9HRT8	LONG-CHAIN ACYL-COA SYNTHETASE 2 family protein	POPTR_0009s11300g	ident	4.3	73.432	18.24	3	3	3
Cellular Component	GO:0005737	6	cytoplasm	1.58753e-182	A9PD21	Vacuolar ATP synthase family protein	POPTR_0006s26480g	ident	5.7	17.931	9.7892	1	1	1
Cellular Component	GO:0005737	6	cytoplasm	1.58753e-182	A9P806	Ribosomal protein 1	POPTR_0005s21640g	ident	24.9	44.38	93.754	14	11	2
Cellular Component	GO:0005737	6	cytoplasm	1.58753e-182	B9N3V5	ATP-dependent 6-phosphofructokinase	PFK	ident	21.2	52.078	56.202	8	7	6
Cellular Component	GO:0005737	6	cytoplasm	1.58753e-182	B9GIF9	Signal recognition particle 54 kDa protein	POPTR_0001s26040g	ident	21.4	54.944	62.671	8	9	9
Cellular Component	GO:0005737	6	cytoplasm	1.58753e-182	B9HU25	ATP synthase subunit d, mitochondrial	POPTR_0010s22480g	ident	16.1	19.659	27.314	5	3	2
Cellular Component	GO:0005737	6	cytoplasm	1.58753e-182	U5GME2	Putative G3BP-like protein OS=Schizosaccharomyces pombe (strain 972 / ATCC 24843) GN=nxt3 PE=1 SV=1	POPTR_0002s25880g	ident	21.5	50.903	85.407	9	7	7
Cellular Component	GO:0005737	6	cytoplasm	1.58753e-182	B9IIU1	Signal recognition particle 54 kDa protein, chloroplastic OS=Arabidopsis thaliana GN=FFC PE=1 SV=1	POPTR_0016s07950g	ident	8.8	66.061	9.4801	2	4	1
Cellular Component	GO:0005737	6	cytoplasm	1.58753e-182	U5GS40	Quinone oxidoreductase OS=Pseudomonas aeruginosa (strain ATCC 15692 / DSM 22644 / CIP 104116 / JCM 14847/ LMG 12228 / 1C / PRS 101 / PAO1) GN=qor PE=3 SV=2	POPTR_0001s02300g	ident	17.5	44.375	72.647	8	6	5
Cellular Component	GO:0005737	6	cytoplasm	1.58753e-182	A0A2K1Y4R4	Acyl-coenzyme A oxidase	POPTR_013G123500v3	ident	22.3	76.633	136.34	15	12	12
Cellular Component	GO:0005737	6	cytoplasm	1.58753e-182	B9HKA4	1,2-dihydroxy-3-keto-5-methylthiopentene dioxygenase	POPTR_0008s15730g	ident	12	23.414	13.31	2	2	2
Cellular Component	GO:0005737	6	cytoplasm	1.58753e-182	A0A2K2AK20	40S ribosomal protein S18 OS=Arabidopsis thaliana GN=RPS18A PE=1 SV=1	POPTR_005G211200v3	ident	42.2	17.172	90.906	17	6	1
Cellular Component	GO:0005737	6	cytoplasm	1.58753e-182	B9GRT9	Translocase of chloroplast	POPTR_0002s18420g	ident	8.8	33.116	11.682	3	2	2
Cellular Component	GO:0005737	6	cytoplasm	1.58753e-182	A4GYX3	30S ribosomal protein S15, chloroplastic	rps15	ident	43.3	10.663	34.437	5	5	5
Cellular Component	GO:0005737	6	cytoplasm	1.58753e-182	A0A2K1XB61	40S ribosomal protein S2-3 OS=Arabidopsis thaliana GN=RPS2C PE=1 SV=2	POPTR_016G055000v3	ident	28	29.147	140.95	14	7	7
Cellular Component	GO:0005737	6	cytoplasm	1.58753e-182	A0A2K1ZZH1	AP-1 complex subunit gamma	POPTR_006G092800v3	ident	3.6	94.879	18.395	2	3	3
Cellular Component	GO:0005737	6	cytoplasm	1.58753e-182	B9ILV3	Phosphotransferase	POPTR_0018s09560g	ident	22.9	53.823	89.018	14	10	9
Cellular Component	GO:0005737	6	cytoplasm	1.58753e-182	B9GMU1	Glycyl-tRNA synthetase family protein	POPTR_0001s12970g	ident	13.6	77	80.792	13	8	1
Cellular Component	GO:0005737	6	cytoplasm	1.58753e-182	A0A2K2BZT7	30S ribosomal protein S17, chloroplastic OS=Arabidopsis thaliana GN=RPS17 PE=1 SV=1	POPTR_001G184000v3	ident	6.2	17.715	7.0152	1	1	1
Cellular Component	GO:0005737	6	cytoplasm	1.58753e-182	B9HTK5	Methionyl-tRNA synthetase family protein	POPTR_0010s21430g	ident	4.8	67.982	19.893	3	3	3
Cellular Component	GO:0005737	6	cytoplasm	1.58753e-182	A0A2K1Z3E5	Ribosomal protein	POPTR_009G057100v3	ident	33.1	34.173	65.165	20	9	2
Cellular Component	GO:0005737	6	cytoplasm	1.58753e-182	B9GRR3	Conserved oligomeric Golgi complex subunit 4 OS=Arabidopsis thaliana GN=COG4 PE=2 SV=1	POPTR_0002s18030g	ident	4.5	85.442	18.717	3	3	3
Cellular Component	GO:0005737	6	cytoplasm	1.58753e-182	A9P931	60S ribosomal protein L27a-3 OS=Arabidopsis thaliana GN=RPL27AC PE=2 SV=2	POPTR_0008s19110g	ident	32.2	16.501	33.148	5	4	1
Cellular Component	GO:0005737	6	cytoplasm	1.58753e-182	U5GQN5	Soluble inorganic pyrophosphatase 1 OS=Arabidopsis thaliana GN=PPA1 PE=1 SV=1	POPTR_0002s18230g	ident	14.4	24.723	23.551	4	4	1
Cellular Component	GO:0005737	6	cytoplasm	1.58753e-182	A0A2K1Y0H6	Protein transport protein Sec24-like At4g32640 OS=Arabidopsis thaliana GN=At4g32640 PE=2 SV=3	POPTR_013G035800v3	ident	5.1	101.8	22.141	5	3	3
Cellular Component	GO:0005737	6	cytoplasm	1.58753e-182	A9P7V0	Eukaryotic translation initiation factor 6	EIF6	ident	14.3	26.423	26.481	3	3	3
Cellular Component	GO:0005737	6	cytoplasm	1.58753e-182	A9PCT0	Ribosomal protein L2	POPTR_0005s11780g	ident	21.5	28.198	35.409	9	4	4
Cellular Component	GO:0005737	6	cytoplasm	1.58753e-182	A0A2K1X0V9	L-arabinokinase OS=Arabidopsis thaliana GN=ARA1 PE=1 SV=1	POPTR_018G145700v3	ident	2	104.86	13.504	2	2	2
Cellular Component	GO:0005737	6	cytoplasm	1.58753e-182	B9IB28	Carboxypeptidase	POPTR_0014s17580g	ident	13.3	55.653	43.682	6	6	6
Cellular Component	GO:0005737	6	cytoplasm	1.58753e-182	U5GSF5	Aminoacylase-1 OS=Mus musculus GN=Acy1 PE=1 SV=1	POPTR_0002s08590g	ident	5.4	49.172	12.757	2	2	2
Cellular Component	GO:0005737	6	cytoplasm	1.58753e-182	U5GH74	Phosphatidate cytidylyltransferase	POPTR_0004s00280g	ident	3.1	48.825	7.3211	1	1	1
Cellular Component	GO:0005737	6	cytoplasm	1.58753e-182	B9HCW1	Mitochondrial substrate carrier family protein	POPTR_0006s10070g	ident	3.1	43.153	6.5178	1	1	1
Cellular Component	GO:0005737	6	cytoplasm	1.58753e-182	A0A2K1ZZK7	Mitochondrial uncoupling protein 1 OS=Arabidopsis thaliana GN=PUMP1 PE=1 SV=1	POPTR_006G095500v3	ident	16.7	24.879	7.0653	1	3	1
Cellular Component	GO:0005737	6	cytoplasm	1.58753e-182	B9MUA4	Phosphoribulokinase	POPTR_0001s01630g	ident	16.3	45.025	25.878	2	6	2
Cellular Component	GO:0005737	6	cytoplasm	1.58753e-182	B9HK59	60S ribosomal protein L7-2	POPTR_0008s00840g	ident	28.8	28.267	15.315	2	8	2
Cellular Component	GO:0005737	6	cytoplasm	1.58753e-182	B9I665	Phenylalanyl-tRNA synthetase beta chain family protein	POPTR_0013s06440g	ident	15.6	67.358	61.717	9	8	4
Cellular Component	GO:0005737	6	cytoplasm	1.58753e-182	A4GYP7	30S ribosomal protein S2, chloroplastic	rps2	ident	29.2	26.928	44.751	9	6	6
Cellular Component	GO:0005737	6	cytoplasm	1.58753e-182	B9I7A9	Putative Rab geranylgeranyl transferase type II beta subunit family protein	POPTR_0013s01400g	ident	3.8	34.715	6.4511	1	1	1
Cellular Component	GO:0005737	6	cytoplasm	1.58753e-182	A0A2K1YMB1	Isoleucine--tRNA ligase, chloroplastic/mitochondrial OS=Arabidopsis thaliana GN=OVA2 PE=2 SV=1	POPTR_010G014500v3	ident	3.1	104.77	16.106	2	2	2
Cellular Component	GO:0005737	6	cytoplasm	1.58753e-182	B9N5I4	Asparaginyl-tRNA synthetase family protein	POPTR_0018s06660g	ident	17.4	63.387	70.681	10	10	6
Cellular Component	GO:0005737	6	cytoplasm	1.58753e-182	B9MVD9	Peroxisomal biogenesis factor 11 family protein	POPTR_0014s04160g	ident	3.5	28.554	7.2613	1	1	1
Cellular Component	GO:0005737	6	cytoplasm	1.58753e-182	B9HZV0	Proton pump-interactor 1 OS=Arabidopsis thaliana GN=PPI1 PE=1 SV=2	POPTR_0011s12040g	ident	9.7	70.674	30.392	5	5	4
Cellular Component	GO:0005737	6	cytoplasm	1.58753e-182	A0A2K1XZU4	Mitochondrial Rho GTPase	POPTR_013G023100v3	ident	13.3	71.15	64.166	7	6	1
Cellular Component	GO:0005737	6	cytoplasm	1.58753e-182	A0A2K2AXH4	Cell division protein FtsZ homolog 2-1, chloroplastic OS=Arabidopsis thaliana GN=FTSZ2-1 PE=1 SV=2	POPTR_004G203100v3	ident	18.8	49.87	86.23	9	6	2
Cellular Component	GO:0005737	6	cytoplasm	1.58753e-182	B9GSW3	Pre-mRNA splicing factor ATP-dependent RNA helicase family protein	POPTR_0002s19340g	ident	6.6	82.941	33.098	4	4	4
Cellular Component	GO:0005737	6	cytoplasm	1.58753e-182	B9HF78	Bifunctional riboflavin biosynthesis protein RIBA 1, chloroplastic OS=Arabidopsis thaliana GN=RIBA1 PE=1 SV=2	POPTR_0007s04980g	ident	6.4	57.276	31.898	3	3	3
Cellular Component	GO:0005737	6	cytoplasm	1.58753e-182	B9HRH0	Squalene synthase family protein	POPTR_0009s12590g	ident	2.9	47.307	6.9946	1	1	1
Cellular Component	GO:0005737	6	cytoplasm	1.58753e-182	B9MYW1	Sec23/sec24 transport family protein	POPTR_0004s21200g	ident	7	82.593	34.332	4	4	4
Cellular Component	GO:0005737	6	cytoplasm	1.58753e-182	A4GYQ4	Photosystem II D2 protein	psbD	ident	13.9	39.549	44.691	5	3	3
Cellular Component	GO:0005737	6	cytoplasm	1.58753e-182	A9PFJ7	Pyruvate kinase	POPTR_0008s00310g	ident	10.9	55.724	150.09	7	4	4
Cellular Component	GO:0005737	6	cytoplasm	1.58753e-182	B9IKY4	E3 ubiquitin-protein ligase KEG OS=Arabidopsis thaliana GN=KEG PE=1 SV=2	POPTR_0018s01840g	ident	5.1	70.197	6.0462	1	2	1
Cellular Component	GO:0005737	6	cytoplasm	1.58753e-182	B9IFW5	40S ribosomal protein S7	POPTR_0016s10560g	ident	32.5	22.034	17.869	2	6	2
Cellular Component	GO:0005737	6	cytoplasm	1.58753e-182	A0A2K2A3P0	Uncharacterized protein	POPTR_006G170500v3	ident	4.6	24.418	7.1484	1	1	1
Cellular Component	GO:0005737	6	cytoplasm	1.58753e-182	A9PEK8	S-adenosylmethionine synthase 3	METK3	ident	42	43.169	122.33	14	11	2
Cellular Component	GO:0005737	6	cytoplasm	1.58753e-182	A0A2K2BNS4	60S ribosomal protein L13a-3 OS=Arabidopsis thaliana GN=RPL13AC PE=2 SV=1	POPTR_002G242600v3	ident	19.4	23.63	10.988	2	4	2
Cellular Component	GO:0005737	6	cytoplasm	1.58753e-182	U5GCM6	Acetylglutamate kinase, chloroplastic OS=Arabidopsis thaliana GN=NAGK PE=1 SV=1	POPTR_0006s29450g	ident	22	36.428	45.565	8	7	7
Cellular Component	GO:0005737	6	cytoplasm	1.58753e-182	A4GYR8	Ribulose bisphosphate carboxylase large chain	rbcL	ident	34.3	52.6	323.31	93	18	18
Cellular Component	GO:0005737	6	cytoplasm	1.58753e-182	U5GBT4	Signal recognition particle 54 kDa protein, chloroplastic OS=Arabidopsis thaliana GN=FFC PE=1 SV=1	POPTR_0006s22810g	ident	10.9	62.974	34.467	6	5	2
Cellular Component	GO:0005737	6	cytoplasm	1.58753e-182	B9I120	Vacuolar protein sorting-associated protein 29	POPTR_0011s02930g	ident	16.8	21.201	21.119	3	3	3
Cellular Component	GO:0005737	6	cytoplasm	1.58753e-182	A9PGG5	60S ribosomal protein L10	POPTR_0013s15560g	ident	21.4	24.893	36.099	7	4	4
Cellular Component	GO:0005737	6	cytoplasm	1.58753e-182	B9IJJ7	Ribosomal protein L13	POPTR_0017s10450g	ident	9.3	23.616	12.523	2	2	2
Cellular Component	GO:0005737	6	cytoplasm	1.58753e-182	U5G3K9	RNA-binding protein 8A OS=Salmo salar GN=rbm8a PE=2 SV=1	POPTR_0009s05550g	ident	7.8	22.581	12.596	1	1	1
Cellular Component	GO:0005737	6	cytoplasm	1.58753e-182	A9PGX0	Double-stranded DNA-binding family protein	POPTR_0001s34500g	ident	17.2	14.748	52.031	3	2	2
Cellular Component	GO:0005737	6	cytoplasm	1.58753e-182	U5FL60	4-hydroxy-tetrahydrodipicolinate reductase 2, chloroplastic OS=Arabidopsis thaliana GN=DAPB2 PE=2 SV=1	POPTR_0017s00350g	ident	8.6	35.704	16.99	2	2	2
Cellular Component	GO:0005737	6	cytoplasm	1.58753e-182	B9N1F9	Probable bifunctional methylthioribulose-1-phosphate dehydratase/enolase-phosphatase E1	POPTR_0001s40980g	ident	5.8	56.862	19.648	3	3	3
Cellular Component	GO:0005737	6	cytoplasm	1.58753e-182	U5GSW6	Lil3 family protein	POPTR_0001s15140g	ident	5.9	28.137	14.297	1	1	1
Cellular Component	GO:0005737	6	cytoplasm	1.58753e-182	B9GGN1	Phosphotransferase	POPTR_0001s19130g	ident	14.6	53.626	34.291	4	5	4
Cellular Component	GO:0005737	6	cytoplasm	1.58753e-182	A4GYX4	Protein TIC 214	TIC214	ident	3.2	218.33	23.108	4	4	4
Cellular Component	GO:0005737	6	cytoplasm	1.58753e-182	U5GMR6	Eukaryotic peptide chain release factor subunit 1-2 family protein	POPTR_0003s15730g	ident	10.6	49.056	35.395	5	4	4
Cellular Component	GO:0005737	6	cytoplasm	1.58753e-182	B9HQX1	Poly [ADP-ribose] polymerase	POPTR_0009s14610g	ident	7.6	90.533	39.966	7	4	4
Cellular Component	GO:0005737	6	cytoplasm	1.58753e-182	B9HJK0	Anthranilate synthase beta subunit 1, chloroplastic OS=Arabidopsis thaliana GN=ASB1 PE=1 SV=1	POPTR_0008s13820g	ident	9.4	30.271	12.432	2	2	2
Cellular Component	GO:0005737	6	cytoplasm	1.58753e-182	B9H4Y2	Tubulin beta chain	POPTR_0005s26140g	ident	17.8	50.276	14.508	2	7	0
Cellular Component	GO:0005737	6	cytoplasm	1.58753e-182	A4GYR2	30S ribosomal protein S4, chloroplastic	rps4	ident	20.9	23.497	28.73	5	5	5
Cellular Component	GO:0005737	6	cytoplasm	1.58753e-182	B9HH75	Isoleucyl-tRNA synthetase family protein	POPTR_0007s02170g	ident	7.7	134.53	13.82	2	9	2
Cellular Component	GO:0005737	6	cytoplasm	1.58753e-182	B9GQ08	Catalase	POPTR_0002s01080g	ident	36.4	56.638	172.74	27	14	5
Cellular Component	GO:0005737	6	cytoplasm	1.58753e-182	A0A2K1WQ96	ATP phosphoribosyltransferase 2, chloroplastic OS=Arabidopsis thaliana GN=HISN1B PE=1 SV=1	POPTR_019G057200v3	ident	13.7	45.646	35.116	5	4	4
Cellular Component	GO:0005737	6	cytoplasm	1.58753e-182	B9HNG9	Trafficking protein particle complex subunit 4 OS=Dictyostelium discoideum GN=trappc4 PE=3 SV=1	POPTR_0009s07410g	ident	5.7	16.001	6.0759	1	1	1
Cellular Component	GO:0005737	6	cytoplasm	1.58753e-182	A9PBT3	Thioredoxin-like protein Clot OS=Arabidopsis thaliana GN=At5g42850 PE=2 SV=1	POPTR_0001s23270g	ident	17.4	14.898	19.032	3	2	2
Cellular Component	GO:0005737	6	cytoplasm	1.58753e-182	U5GKE4	Coiled-coil domain-containing protein 47 OS=Danio rerio GN=ccdc47 PE=2 SV=1	POPTR_0004s23170g	ident	10.8	53.079	26.637	4	4	4
Cellular Component	GO:0005737	6	cytoplasm	1.58753e-182	B9HTM3	2-oxoglutarate dehydrogenase E1 component family protein	POPTR_0010s21610g	ident	25.3	115.88	171.8	25	18	18
Cellular Component	GO:0005737	6	cytoplasm	1.58753e-182	A9PB00	60S ribosomal protein L26B	POPTR_0007s06220g	ident	21.2	16.864	34.905	8	4	4
Cellular Component	GO:0005737	6	cytoplasm	1.58753e-182	B9HHJ9	Uncharacterized protein	POPTR_0008s06350g	ident	14.3	8.6092	6.7666	1	1	1
Cellular Component	GO:0005737	6	cytoplasm	1.58753e-182	U5FGZ5	Proline--tRNA ligase, chloroplastic/mitochondrial OS=Arabidopsis thaliana GN=OVA6 PE=2 SV=1	POPTR_0017s01720g	ident	9	61.45	36.282	6	4	4
Cellular Component	GO:0005737	6	cytoplasm	1.58753e-182	B9IQ90	Histidine--tRNA ligase, cytoplasmic OS=Arabidopsis thaliana GN=At3g02760 PE=2 SV=1	POPTR_0019s10010g	ident	13.1	97.817	63.823	9	9	9
Cellular Component	GO:0005737	6	cytoplasm	1.58753e-182	A0A2K2BXJ3	Glycine cleavage system H protein, mitochondrial (Fragment) OS=Flaveria pubescens GN=GDCSH PE=2 SV=1	POPTR_001G144800v3	ident	5.6	17.454	7.4042	2	1	1
Cellular Component	GO:0005737	6	cytoplasm	1.58753e-182	B9GZK9	26S proteasome regulatory subunit family protein	POPTR_0003s09720g	ident	12.2	44.452	12.095	2	4	2
Cellular Component	GO:0005737	6	cytoplasm	1.58753e-182	B9GXD4	FtsH protease family protein	POPTR_0003s04910g	ident	6.5	101.66	30.259	5	5	5
Cellular Component	GO:0005737	6	cytoplasm	1.58753e-182	B9ILU7	Probable 3-hydroxyisobutyrate dehydrogenase-like 1, mitochondrial OS=Arabidopsis thaliana GN=At4g29120 PE=1 SV=1	POPTR_0018s09500g	ident	7.4	36.357	17.287	3	2	2
Cellular Component	GO:0005737	6	cytoplasm	1.58753e-182	B9HQD5	RUBISCO SUBUNIT BINDING-protein ALPHA SUBUNIT	POPTR_0009s01470g	ident	18.1	61.99	140.43	26	9	3
Cellular Component	GO:0005737	6	cytoplasm	1.58753e-182	B9IMB4	Translation initiation factor IF-3	POPTR_0018s11300g	ident	9	31.176	20.59	3	2	2
Cellular Component	GO:0005737	6	cytoplasm	1.58753e-182	A9PHC1	60S ribosomal protein L14	POPTR_0002s03700g	ident	22.6	15.445	28.394	6	4	0
Cellular Component	GO:0005737	6	cytoplasm	1.58753e-182	A9PDZ4	40S ribosomal protein S26	POPTR_0013s09160g	ident	35.9	14.978	16.314	2	4	1
Cellular Component	GO:0005737	6	cytoplasm	1.58753e-182	B9GLZ8	NADPH:QUINONE OXIDOREDUCTASE family protein	POPTR_0001s06530g	ident	9.2	21.424	13.334	2	2	2
Cellular Component	GO:0005737	6	cytoplasm	1.58753e-182	B9GG50	3-isopropylmalate dehydrogenase	POPTR_0001s18630g	ident	12	43.68	33.411	5	4	4
Cellular Component	GO:0005737	6	cytoplasm	1.58753e-182	B9H851	Photosystem 2 family protein	POPTR_0005s22780g	ident	7.4	19.313	7.4804	1	1	1
Cellular Component	GO:0005737	6	cytoplasm	1.58753e-182	A0A2K1YYS6	Exocyst complex component SEC8 OS=Arabidopsis thaliana GN=SEC8 PE=1 SV=1	POPTR_010G227100v3	ident	2	113.6	10.922	2	2	2
Cellular Component	GO:0005737	6	cytoplasm	1.58753e-182	B9GSG1	Arginyl-tRNA synthetase family protein	POPTR_0002s19960g	ident	8.6	66.419	23.838	2	4	4
Cellular Component	GO:0005737	6	cytoplasm	1.58753e-182	B9IFK6	Signal recognition particle subunit SRP68	POPTR_0015s11690g	ident	6.2	68.439	22.849	4	3	2
Cellular Component	GO:0005737	6	cytoplasm	1.58753e-182	B9I1H4	Glycosyl transferase family 20 family protein	POPTR_0011s06910g	ident	17.5	96.195	81.788	13	12	8
Cellular Component	GO:0005737	6	cytoplasm	1.58753e-182	U5GCN9	NADPH:adrenodoxin oxidoreductase, mitochondrial	POPTR_0005s15200g	ident	2	54.134	5.678	1	1	1
Cellular Component	GO:0005737	6	cytoplasm	1.58753e-182	A0A2K1Z4A0	Clathrin heavy chain	POPTR_009G073300v3	ident	21	188.35	322.83	52	32	8
Cellular Component	GO:0005737	6	cytoplasm	1.58753e-182	B9ILS7	Dolichyl-diphosphooligosaccharide--protein glycosyltransferase subunit STT3A OS=Arabidopsis thaliana GN=STT3A PE=2 SV=1	POPTR_0018s09300g	ident	5.3	87.043	19.425	3	3	3
Cellular Component	GO:0005737	6	cytoplasm	1.58753e-182	U5GMY6	Glycerol-3-phosphate acyltransferase, chloroplastic	POPTR_0001s01930g	ident	9.7	50.514	28.012	4	4	4
Cellular Component	GO:0005737	6	cytoplasm	1.58753e-182	B9N1D8	Chloroplast 30S ribosomal protein S20	POPTR_0001s40700g	ident	14.3	20.245	15.007	3	2	2
Cellular Component	GO:0005737	6	cytoplasm	1.58753e-182	B9I615	5-methyltetrahydropteroyltriglutamate--homocysteine methyltransferase family protein	POPTR_0013s05850g	ident	16.9	85.081	10.779	3	10	1
Cellular Component	GO:0005737	6	cytoplasm	1.58753e-182	B9HCZ9	Ferritin	POPTR_0006s10480g	ident	6.5	29.1	13.429	3	2	2
Cellular Component	GO:0005737	6	cytoplasm	1.58753e-182	A9PF44	Glucose-1-phosphate adenylyltransferase	POPTR_0014s16990g	ident	18	57.185	74.646	11	8	8
Cellular Component	GO:0005737	6	cytoplasm	1.58753e-182	B9IEE2	Signal recognition particle 19 kDa family protein	POPTR_0015s04780g	ident	5.1	15.085	-2	1	1	1
Cellular Component	GO:0005737	6	cytoplasm	1.58753e-182	A9P8L6	40S ribosomal protein S26	POPTR_0019s08500g	ident	36.4	15.064	59.219	7	5	2
Cellular Component	GO:0005737	6	cytoplasm	1.58753e-182	A9PF90	Protein transport protein Sec61 subunit beta	POPTR_0014s05810g	ident	23.2	8.3487	15.276	3	2	2
Cellular Component	GO:0005737	6	cytoplasm	1.58753e-182	B9N0E1	50S ribosomal protein L7/L12 OS=Liberibacter africanus subsp. capensis GN=rplL PE=3 SV=1	POPTR_0004s23300g	ident	5.8	18.597	6.5752	1	1	1
Cellular Component	GO:0005737	6	cytoplasm	1.58753e-182	B9HFU8	Alanine:glyoxylate aminotransferase 2 family protein	POPTR_0007s06190g	ident	17.9	52.162	46.542	9	7	7
Cellular Component	GO:0005737	6	cytoplasm	1.58753e-182	B9HG32	Alanine--glyoxylate aminotransferase 2 homolog 1, mitochondrial OS=Arabidopsis thaliana GN=AGT2 PE=1 SV=1	POPTR_0007s06700g	ident	5.2	20.978	5.92	1	1	1
Cellular Component	GO:0005737	6	cytoplasm	1.58753e-182	B9H830	Conserved oligomeric Golgi complex subunit 5 OS=Homo sapiens GN=COG5 PE=1 SV=3	POPTR_0005s22560g	ident	1.8	93.506	7.4555	1	1	1
Cellular Component	GO:0005737	6	cytoplasm	1.58753e-182	A0A2K2C838	Glucuronokinase 1 OS=Arabidopsis thaliana GN=GLCAK1 PE=1 SV=1	POPTR_001G343400v3	ident	4.6	26.88	6.8502	1	1	1
Cellular Component	GO:0005737	6	cytoplasm	1.58753e-182	A9PAF1	NADH dehydrogenase [ubiquinone] 1 beta subcomplex subunit 7 OS=Arabidopsis thaliana GN=At2g02050 PE=3 SV=1	POPTR_0008s14130g	ident	8.9	11.823	6.1045	1	1	1
Cellular Component	GO:0005737	6	cytoplasm	1.58753e-182	B9HTJ3	3-oxo-5-alpha-steroid 4-dehydrogenase family protein	POPTR_0010s21190g	ident	12.6	36.083	18.699	3	3	3
Cellular Component	GO:0005737	6	cytoplasm	1.58753e-182	A0A2K1Z411	Dihydropyrimidinase OS=Arabidopsis thaliana GN=PYD2 PE=1 SV=1	POPTR_009G067700v3	ident	7.8	57.316	28.955	5	5	5
Cellular Component	GO:0005737	6	cytoplasm	1.58753e-182	B9I1Y1	Importin beta-2 family protein	POPTR_0012s02460g	ident	9.9	96.569	53.971	9	7	2
Cellular Component	GO:0005737	6	cytoplasm	1.58753e-182	B9HLC9	T-complex protein 1	POPTR_0008s18260g	ident	26.4	59.185	79.513	14	11	11
Cellular Component	GO:0005737	6	cytoplasm	1.58753e-182	B9GRD7	Mitochondrial import receptor subunit TOM22 family protein	POPTR_0002s25900g	ident	8.3	11.601	6.4958	1	1	1
Cellular Component	GO:0005737	6	cytoplasm	1.58753e-182	B9IA08	Mitochondrial transcription termination factor family protein	POPTR_0014s13360g	ident	1.5	59.079	5.692	1	1	1
Cellular Component	GO:0005737	6	cytoplasm	1.58753e-182	A0A2K1ZN33	Soluble inorganic pyrophosphatase PPA1 OS=Solanum tuberosum GN=PPA1 PE=1 SV=1	POPTR_007G022700v3	ident	19.7	23.997	7.5645	1	4	1
Cellular Component	GO:0005737	6	cytoplasm	1.58753e-182	B9N820	Starch synthase, chloroplastic/amyloplastic	POPTR_0018s14640g	ident	3.4	69.119	12.834	2	2	2
Cellular Component	GO:0005737	6	cytoplasm	1.58753e-182	A9PC68	Glutaredoxin-C2 OS=Arabidopsis thaliana GN=GRXC2 PE=2 SV=1	POPTR_0001s35090g	ident	23.9	11.445	14.616	3	2	2
Cellular Component	GO:0005737	6	cytoplasm	1.58753e-182	A9PED8	50S ribosomal protein L5, chloroplastic OS=Arabidopsis thaliana GN=RPL5 PE=2 SV=1	POPTR_0002s15600g	ident	31.2	28.816	62.923	8	6	5
Cellular Component	GO:0005737	6	cytoplasm	1.58753e-182	A9PBU0	50S ribosomal protein L12-2	POPTR_0001s35230g	ident	21.4	19.636	15.106	2	2	2
Cellular Component	GO:0005737	6	cytoplasm	1.58753e-182	B9HDB3	Aminopeptidase	POPTR_0006s24090g	ident	16.8	98.241	192.09	29	15	1
Cellular Component	GO:0005737	6	cytoplasm	1.58753e-182	B9HJD4	Armadillo/beta-catenin repeat family protein	POPTR_0008s13120g	ident	4.1	88.788	18.785	3	3	3
Cellular Component	GO:0005737	6	cytoplasm	1.58753e-182	A9PI62	50S ribosomal protein L9, chloroplastic OS=Arabidopsis thaliana GN=RPL9 PE=2 SV=1	POPTR_0004s22660g	ident	24.7	22.18	28.92	7	4	4
Cellular Component	GO:0005737	6	cytoplasm	1.58753e-182	B9I0P1	GA family protein	POPTR_0011s15170g	ident	32.1	21.954	7.6502	1	8	1
Cellular Component	GO:0005737	6	cytoplasm	1.58753e-182	B9GIQ0	Proline iminopeptidase	POPTR_0001s29460g	ident	32.8	44.246	119.52	15	11	11
Cellular Component	GO:0005737	6	cytoplasm	1.58753e-182	B9HSM0	Clathrin heavy chain	POPTR_0010s19420g	ident	14.8	193.36	7.0998	2	24	1
Cellular Component	GO:0005737	6	cytoplasm	1.58753e-182	B9ICR4	Coatomer subunit delta	POPTR_0015s14960g	ident	5.9	58.317	6.7489	1	3	1
Cellular Component	GO:0005737	6	cytoplasm	1.58753e-182	A0A2K1Y5G8	50S ribosomal protein L2, chloroplastic OS=Populus trichocarpa GN=rpl2-A PE=3 SV=1	POPTR_013G138400v3	ident	18.4	26.486	41.427	4	3	3
Cellular Component	GO:0005737	6	cytoplasm	1.58753e-182	B9HZL5	Probable dolichyl-diphosphooligosaccharide--protein glycosyltransferase subunit 3B OS=Arabidopsis thaliana GN=OST3B PE=2 SV=1	POPTR_0011s00460g	ident	3.7	39.941	6.2527	2	1	1
Cellular Component	GO:0005737	6	cytoplasm	1.58753e-182	B9GZ15	Transaldolase family protein	POPTR_0003s16030g	ident	23.6	47.493	80.275	9	8	2
Cellular Component	GO:0005737	6	cytoplasm	1.58753e-182	B9H652	Protein STRICTOSIDINE SYNTHASE-LIKE 4 OS=Arabidopsis thaliana GN=SSL4 PE=1 SV=1	POPTR_0005s10240g	ident	9.4	42.041	27.83	2	2	2
Cellular Component	GO:0005737	6	cytoplasm	1.58753e-182	A0A2K1WT91	Protein TIC110, chloroplastic OS=Arabidopsis thaliana GN=TIC110 PE=1 SV=1	POPTR_019G127000v3	ident	11.2	111.43	35.539	5	10	4
Cellular Component	GO:0005737	6	cytoplasm	1.58753e-182	A9PHP0	Tubulin beta chain	POPTR_009G067200v3	ident	16.6	50.017	27.622	3	7	1
Cellular Component	GO:0005737	6	cytoplasm	1.58753e-182	A9PGH9	Pyrrolidone-carboxylate peptidase family protein	POPTR_0005s00740g	ident	5.5	24.029	6.5394	1	1	1
Cellular Component	GO:0005737	6	cytoplasm	1.58753e-182	B9MX86	Putative F-box protein At1g65770 OS=Arabidopsis thaliana GN=At1g65770 PE=4 SV=1	POPTR_0005s10750g	ident	3.5	45.797	8.2292	1	1	1
Cellular Component	GO:0005737	6	cytoplasm	1.58753e-182	A0A2K1Y5F4	50S ribosomal protein L22, chloroplastic OS=Populus trichocarpa GN=rpl22 PE=3 SV=1	POPTR_013G136600v3	ident	28.9	16.69	12.174	2	3	1
Cellular Component	GO:0005737	6	cytoplasm	1.58753e-182	U5GR57	Nudix hydrolase 3 OS=Arabidopsis thaliana GN=NUDT3 PE=1 SV=1	POPTR_0003s18380g	ident	9.6	85.585	50.705	9	7	7
Cellular Component	GO:0005737	6	cytoplasm	1.58753e-182	B9I3N6	Mitochondrial pyruvate carrier (Fragment)	POPTR_0012s09690g	ident	6	18.633	10.938	2	1	1
Cellular Component	GO:0005737	6	cytoplasm	1.58753e-182	A0A2K1ZD81	Clathrin heavy chain	POPTR_008G070600v3	ident	14	193.48	23.321	3	24	0
Cellular Component	GO:0005737	6	cytoplasm	1.58753e-182	B9GRL8	Proteasome subunit alpha type	POPTR_0002s03530g	ident	27.6	29.391	5.9823	1	7	1
Cellular Component	GO:0005737	6	cytoplasm	1.58753e-182	A0A2K2C486	Imidazole glycerol phosphate synthase hisHF	POPTR_001G267400v3	ident	7.1	61.724	24.191	5	4	2
Cellular Component	GO:0005737	6	cytoplasm	1.58753e-182	B9N7F0	Small nuclear ribonucleoprotein	POPTR_0001s16680g	ident	12.5	14.639	7.2194	1	1	1
Cellular Component	GO:0005737	6	cytoplasm	1.58753e-182	A9P822	S-adenosylmethionine synthase 1	METK1	ident	37.2	43.213	29.875	2	9	2
Cellular Component	GO:0005737	6	cytoplasm	1.58753e-182	B9IC07	Guanine nucleotide exchange family protein	POPTR_0014s06630g	ident	2.2	198.21	6.464	1	4	0
Cellular Component	GO:0005737	6	cytoplasm	1.58753e-182	B9GPA1	Ribosomal protein L15	POPTR_0002s14250g	ident	22.5	24.245	30.711	5	4	4
Cellular Component	GO:0005737	6	cytoplasm	1.58753e-182	B9ICK8	Putative vesicle-associated membrane protein 726 OS=Arabidopsis thaliana GN=VAMP726 PE=2 SV=2	POPTR_0015s15690g	ident	8.7	24.595	21.631	1	1	1
Cellular Component	GO:0005737	6	cytoplasm	1.58753e-182	B9H5M5	26S proteasome regulatory subunit family protein	POPTR_0005s08930g	ident	17.9	50.527	11.556	2	7	2
Cellular Component	GO:0005737	6	cytoplasm	1.58753e-182	B9MX74	Synbindin family protein	POPTR_0017s00860g	ident	6.5	19.059	6.5122	1	1	1
Cellular Component	GO:0005737	6	cytoplasm	1.58753e-182	B9HAE9	Clathrin assembly family protein	POPTR_0006s27110g	ident	1.5	72.452	5.9265	1	1	1
Cellular Component	GO:0005737	6	cytoplasm	1.58753e-182	B9IBX3	Golgi SNAP receptor complex member 1	POPTR_0014s06230g	ident	8.6	26.972	5.8996	1	2	1
Cellular Component	GO:0005737	6	cytoplasm	1.58753e-182	A0A2K2A1Q4	Glutathione S-transferase L3 OS=Arabidopsis thaliana GN=GSTL3 PE=2 SV=1	POPTR_006G133500v3	ident	4.6	24.616	5.7031	1	1	1
Cellular Component	GO:0005737	6	cytoplasm	1.58753e-182	A0A2K2A3G6	Lysine--tRNA ligase	POPTR_006G166000v3	ident	17.7	61.508	58.825	11	9	6
Cellular Component	GO:0005737	6	cytoplasm	1.58753e-182	B9GRC2	ABC transporter family protein	POPTR_0002s25710g	ident	2.9	117.57	17.917	3	3	3
Cellular Component	GO:0005737	6	cytoplasm	1.58753e-182	A0A2K2BTN7	60S ribosomal protein L21-1 OS=Arabidopsis thaliana GN=RPL21A PE=2 SV=2	POPTR_001G071100v3	ident	13.8	15.017	6.6041	1	2	1
Cellular Component	GO:0005737	6	cytoplasm	1.58753e-182	B9GPZ0	DEAD/DEAH box helicase family protein	POPTR_0002s15890g	ident	13.2	57.242	52.623	5	5	5
Cellular Component	GO:0005737	6	cytoplasm	1.58753e-182	B9IIV1	60S ribosomal protein L23a OS=Daucus carota GN=RPL23A PE=2 SV=1	POPTR_0016s08070g	ident	21.9	17.267	40.872	7	6	6
Cellular Component	GO:0005737	6	cytoplasm	1.58753e-182	A4GYU3	DNA-directed RNA polymerase subunit alpha	rpoA	ident	21.2	39.092	46.51	7	6	6
Cellular Component	GO:0005737	6	cytoplasm	1.58753e-182	A4GYR7	ATP synthase subunit beta, chloroplastic	atpB	ident	45.2	53.706	274.64	47	17	16
Cellular Component	GO:0005737	6	cytoplasm	1.58753e-182	B9GWP1	ADP,ATP carrier protein	POPTR_0003s05760g	ident	5.3	68.133	18.113	3	3	3
Cellular Component	GO:0005737	6	cytoplasm	1.58753e-182	B9HR68	L-ascorbate peroxidase family protein	POPTR_0009s13650g	ident	28	31.444	22.895	3	7	2
Cellular Component	GO:0005737	6	cytoplasm	1.58753e-182	A0A2K1Z3Q5	Imidazole glycerol phosphate synthase hisHF, chloroplastic OS=Arabidopsis thaliana GN=HISN4 PE=2 SV=1	POPTR_009G061700v3	ident	6.6	56.826	6.716	1	3	1
Cellular Component	GO:0005737	6	cytoplasm	1.58753e-182	A0A2K1ZC12	Protein transport protein Sec24-like At3g07100 OS=Arabidopsis thaliana GN=At3g07100 PE=2 SV=2	POPTR_008G049700v3	ident	7.8	106.64	47.634	6	7	7
Cellular Component	GO:0005737	6	cytoplasm	1.58753e-182	U5FV61	Clathrin light chain	POPTR_0011s04920g	ident	6.2	35.419	41.527	3	3	3
Cellular Component	GO:0005737	6	cytoplasm	1.58753e-182	A9PB31	Mitochondrial import inner membrane translocase subunit TIM8 OS=Arabidopsis thaliana GN=TIM8 PE=1 SV=1	POPTR_0015s11410g	ident	30.8	8.798	17.292	3	2	2
Cellular Component	GO:0005737	6	cytoplasm	1.58753e-182	A9P8E8	40S ribosomal protein S18 OS=Arabidopsis thaliana GN=RPS18A PE=1 SV=1	POPTR_0002s05220g	ident	40.8	17.635	10.147	1	6	1
Cellular Component	GO:0005737	6	cytoplasm	1.58753e-182	A9P9M1	Pyrophosphate--fructose 6-phosphate 1-phosphotransferase subunit beta	PFP-BETA	ident	27.8	61.299	104.51	21	13	7
Cellular Component	GO:0005737	6	cytoplasm	1.58753e-182	B9HLR8	AP-1 complex subunit mu-2 OS=Arabidopsis thaliana GN=AP1M2 PE=1 SV=1	POPTR_0008s19180g	ident	2.2	41.285	5.9772	1	1	1
Cellular Component	GO:0005737	6	cytoplasm	1.58753e-182	A0A2K2AXF7	Ribosomal protein	POPTR_004G202800v3	ident	27.7	18.789	45.866	11	5	2
Cellular Component	GO:0005737	6	cytoplasm	1.58753e-182	B9I0B9	Tryptophan synthase	POPTR_0011s13930g	ident	26.3	51.459	101.59	12	10	5
Cellular Component	GO:0005737	6	cytoplasm	1.58753e-182	A9PDL5	60S ribosomal protein L38 OS=Arabidopsis thaliana GN=RPL38A PE=3 SV=1	POPTR_0007s01660g	ident	53.6	8.0244	39.685	6	4	1
Cellular Component	GO:0005737	6	cytoplasm	1.58753e-182	B9IC56	Dehydration-responsive family protein	POPTR_0014s07150g	ident	3.7	67.004	12.904	2	2	2
Cellular Component	GO:0005737	6	cytoplasm	1.58753e-182	B9HSR0	60S acidic ribosomal protein P0	POPTR_0010s19860g	ident	21.9	34.096	44.171	8	5	5
Cellular Component	GO:0005737	6	cytoplasm	1.58753e-182	A4GYP3	ATP synthase subunit alpha, chloroplastic	atpA	ident	27.6	55.322	134.86	26	12	12
Cellular Component	GO:0005737	6	cytoplasm	1.58753e-182	B9III1	50S ribosomal protein L22 OS=Sinorhizobium medicae (strain WSM419) GN=rplV PE=3 SV=1	POPTR_0016s06740g	ident	3.6	31.171	6.0571	1	1	1
Cellular Component	GO:0005737	6	cytoplasm	1.58753e-182	A9P9K9	Proteasome subunit alpha type	POPTR_0005s25080g	ident	26.3	30.361	50.759	7	7	1
Cellular Component	GO:0005737	6	cytoplasm	1.58753e-182	B9GUZ6	Seryl-tRNA synthetase family protein	POPTR_0002s10040g	ident	5.5	58.088	14.484	2	2	2
Cellular Component	GO:0005737	6	cytoplasm	1.58753e-182	A4GYU8	50S ribosomal protein L16, chloroplastic	rpl16	ident	42.2	15.413	36.466	7	4	2
Cellular Component	GO:0005737	6	cytoplasm	1.58753e-182	B9HGK0	Mitogen-activated protein kinase	POPTR_0007s00930g	ident	2.5	45.2	7.7034	1	1	1
Cellular Component	GO:0005737	6	cytoplasm	1.58753e-182	B9HCM4	Signal recognition particle subunit SRP72	POPTR_0006s23290g	ident	6.5	73.097	23.826	3	3	3
Cellular Component	GO:0005737	6	cytoplasm	1.58753e-182	B9MXP7	Succinate dehydrogenase [ubiquinone] flavoprotein subunit, mitochondrial	POPTR_0005s12530g	ident	12.4	70.164	7.013	1	6	1
Cellular Component	GO:0005737	6	cytoplasm	1.58753e-182	B9HC44	Succinate dehydrogenase subunit 4 family protein	POPTR_0006s09170g	ident	4.1	27.753	7.1515	1	1	1
Cellular Component	GO:0005737	6	cytoplasm	1.58753e-182	A0A2K2BZR0	Ribosomal protein L37	POPTR_001G183200v3	ident	12.2	9.5681	7.9058	1	1	1
Cellular Component	GO:0005737	6	cytoplasm	1.58753e-182	U5FES1	NADH dehydrogenase [ubiquinone] 1 alpha subcomplex subunit 12	POPTR_0019s07820g	ident	22.9	21.025	28.272	4	3	3
Cellular Component	GO:0005737	6	cytoplasm	1.58753e-182	A9PG24	Red chlorophyll catabolite reductase, chloroplastic OS=Arabidopsis thaliana GN=RCCR PE=1 SV=2	POPTR_0007s11060g	ident	4.3	30.901	6.5654	1	1	1
Cellular Component	GO:0005737	6	cytoplasm	1.58753e-182	B9GPM4	Pyrophosphate--fructose 6-phosphate 1-phosphotransferase subunit alpha	PFP-ALPHA	ident	23.8	67.264	151.09	24	13	9
Cellular Component	GO:0005737	6	cytoplasm	1.58753e-182	B9GXM5	Methionine gamma-lyase OS=Arabidopsis thaliana GN=MGL PE=1 SV=1	POPTR_0003s18600g	ident	2.6	45.605	6.3269	0	1	1
Cellular Component	GO:0005737	6	cytoplasm	1.58753e-182	A9PCW8	Proteasome subunit alpha type	POPTR_0004s18000g	ident	12.9	26.968	20.347	4	3	3
Cellular Component	GO:0005737	6	cytoplasm	1.58753e-182	B9H401	Prefoldin family protein	POPTR_0004s13700g	ident	20	14.676	18.339	4	3	3
Cellular Component	GO:0005737	6	cytoplasm	1.58753e-182	A9PHF1	ER membrane protein complex subunit 4 OS=Xenopus laevis GN=emc4 PE=2 SV=1	POPTR_0018s02780g	ident	8.3	19.776	14.318	1	1	1
Cellular Component	GO:0005737	6	cytoplasm	1.58753e-182	B9GPD1	Vesicle-associated protein 1-3 OS=Arabidopsis thaliana GN=PVA13 PE=2 SV=1	POPTR_0002s14560g	ident	20.3	26.357	26.919	4	4	4
Cellular Component	GO:0005737	6	cytoplasm	1.58753e-182	A9PDZ7	S-adenosylmethionine synthase 2	METK2	ident	36.6	42.956	7.618	1	10	1
Cellular Component	GO:0005737	6	cytoplasm	1.58753e-182	B9H1Y6	Thioredoxin-like 4 family protein	POPTR_0004s03180g	ident	16	14.056	12.159	2	2	2
Cellular Component	GO:0005737	6	cytoplasm	1.58753e-182	A4GYR0	Photosystem I P700 chlorophyll a apoprotein A1	psaA	ident	7.3	83.145	36.829	11	6	6
Cellular Component	GO:0005737	6	cytoplasm	1.58753e-182	B9N4I9	26S proteasome AAA-ATPase subunit family protein	POPTR_0005s02520g	ident	21.3	47.387	68.754	12	9	8
Cellular Component	GO:0005737	6	cytoplasm	1.58753e-182	A9P9G9	60S ribosomal protein L28	POPTR_0001s19490g	ident	42.5	16.388	38.518	7	4	3
Cellular Component	GO:0005737	6	cytoplasm	1.58753e-182	B9HCM1	Chlorophyll a-b binding protein, chloroplastic	POPTR_0006s10040g	ident	18.9	31.175	41.649	6	5	2
Cellular Component	GO:0005737	6	cytoplasm	1.58753e-182	A9PI71	26S proteasome non-ATPase regulatory subunit family protein	POPTR_0003s14270g	ident	30.3	30.704	54.675	8	7	5
Cellular Component	GO:0005737	6	cytoplasm	1.58753e-182	A9PA39	Annexin	POPTR_0002s09610g	ident	23.4	35.967	73.177	9	7	7
Cellular Component	GO:0005737	6	cytoplasm	1.58753e-182	B9N4C2	Protein-lysine N-methyltransferase POPTR_0015s07370g	POPTR_0015s07370g	ident	4.4	37.413	9.9257	1	1	1
Cellular Component	GO:0005737	6	cytoplasm	1.58753e-182	A4GYU7	50S ribosomal protein L14, chloroplastic	rpl14	ident	19.7	13.579	20.62	4	2	2
Cellular Component	GO:0005737	6	cytoplasm	1.58753e-182	B9HHZ9	Acetolactate synthase small subunit 1, chloroplastic OS=Arabidopsis thaliana GN=VAT1 PE=1 SV=1	POPTR_0008s07820g	ident	5.9	53.606	6.3474	0	3	1
Cellular Component	GO:0005737	6	cytoplasm	1.58753e-182	B9N2K4	Transport family protein	POPTR_0019s01710g	ident	15.2	85.951	71.556	9	8	3
Cellular Component	GO:0005737	6	cytoplasm	1.58753e-182	A0A2K2B2X9	40S ribosomal protein SA	POPTR_003G071200v3	ident	29.6	31.981	111.82	10	8	3
Cellular Component	GO:0005737	6	cytoplasm	1.58753e-182	B9N9X9	Protein LOW PSII ACCUMULATION 3, chloroplastic OS=Arabidopsis thaliana GN=LPA3 PE=1 SV=1	POPTR_0001s03560g	ident	6	42.887	13.213	2	2	2
Cellular Component	GO:0005737	6	cytoplasm	1.58753e-182	B9IJY8	Starch synthase, chloroplastic/amyloplastic	POPTR_0017s12040g	ident	2.7	82.985	13.227	2	2	2
Cellular Component	GO:0005737	6	cytoplasm	1.58753e-182	B9N3M4	Glycine cleavage T family protein	POPTR_0001s07940g	ident	9.4	43.162	22.955	3	3	3
Cellular Component	GO:0005737	6	cytoplasm	1.58753e-182	B9I5W7	Importin-5 OS=Mus musculus GN=Ipo5 PE=1 SV=3	POPTR_0013s05320g	ident	5	123.53	20.771	3	5	3
Cellular Component	GO:0005737	6	cytoplasm	1.58753e-182	A4GYS8	Cytochrome b559 subunit alpha	psbE	ident	22.9	9.3965	13.654	2	2	2
Cellular Component	GO:0005737	6	cytoplasm	1.58753e-182	B9I331	5-formyltetrahydrofolate cyclo-ligase	POPTR_0012s07480g	ident	3.4	32.27	5.6625	1	1	1
Cellular Component	GO:0005737	6	cytoplasm	1.58753e-182	B9HG65	26S proteasome regulatory subunit family protein	POPTR_0007s07080g	ident	17.2	50.548	51.666	9	7	2
Cellular Component	GO:0005737	6	cytoplasm	1.58753e-182	B9HLJ4	GCN5-related N-acetyltransferase family protein	POPTR_0008s03750g	ident	25.4	26.25	26.97	4	5	3
Cellular Component	GO:0005737	6	cytoplasm	1.58753e-182	B9GLZ3	Thioredoxin-like protein CITRX, chloroplastic OS=Arabidopsis thaliana GN=CITRX PE=1 SV=1	POPTR_0001s06590g	ident	26.5	21.386	43.493	5	5	5
Cellular Component	GO:0005737	6	cytoplasm	1.58753e-182	B9H0T1	Glucose-1-phosphate adenylyltransferase	POPTR_0004s16440g	ident	6.7	58.255	6.2265	1	3	1
Cellular Component	GO:0005737	6	cytoplasm	1.58753e-182	A0A2K2C4W2	Clathrin heavy chain	POPTR_001G278800v3	ident	23	167.31	99.658	8	31	6
Cellular Component	GO:0005737	6	cytoplasm	1.58753e-182	B9HLY1	ATP synthase subunit d, mitochondrial	POPTR_0008s04340g	ident	17.9	19.919	8.0039	2	2	1
Cellular Component	GO:0005737	6	cytoplasm	1.58753e-182	A9PDK4	Uncharacterized protein	POPTR_0001s37470g	ident	5	35.806	12.471	3	2	2
Cellular Component	GO:0005737	6	cytoplasm	1.58753e-182	A4GYS2	Photosystem I assembly protein Ycf4	ycf4	ident	14.1	21.45	18.408	3	3	3
Cellular Component	GO:0005737	6	cytoplasm	1.58753e-182	B9HDL1	Proteasome subunit alpha type	POPTR_0006s11140g	ident	38.2	27.307	25.15	6	8	2
Cellular Component	GO:0005737	6	cytoplasm	1.58753e-182	B9GFF3	Adenine nucleotide translocator family protein	POPTR_0001s27480g	ident	19.5	42.1	38.612	8	7	3
Cellular Component	GO:0005737	6	cytoplasm	1.58753e-182	A4GYW7	Photosystem I iron-sulfur center	psaC	ident	51.9	9.0384	26.115	5	4	4
Cellular Component	GO:0005737	6	cytoplasm	1.58753e-182	A9PBC3	Glutaredoxin-C4 OS=Arabidopsis thaliana GN=GRXC4 PE=2 SV=2	POPTR_0018s13330g	ident	16.2	14.788	13.753	2	2	2
Cellular Component	GO:0005737	6	cytoplasm	1.58753e-182	U5FTL9	Protein ECERIFERUM 1 OS=Arabidopsis thaliana GN=CER1 PE=1 SV=1	POPTR_0014s15080g	ident	5.3	67.65	36.011	4	3	3
Cellular Component	GO:0005737	6	cytoplasm	1.58753e-182	U5FWD2	Acyl-[acyl-carrier-protein] desaturase	POPTR_0013s13100g	ident	23.2	42.429	66.068	11	6	6
Cellular Component	GO:0005737	6	cytoplasm	1.58753e-182	A0A2K2BSV1	Mitochondrial import receptor subunit TOM20 OS=Solanum tuberosum GN=TOM20 PE=1 SV=1	POPTR_001G054900v3	ident	16.5	18.937	25.085	2	2	2
Cellular Component	GO:0005737	6	cytoplasm	1.58753e-182	A4GYU4	30S ribosomal protein S11, chloroplastic	rps11	ident	10.9	14.954	9.1746	2	1	1
Cellular Component	GO:0005737	6	cytoplasm	1.58753e-182	B9GIL6	T-complex protein 1 subunit beta OS=Arabidopsis thaliana GN=CCT2 PE=1 SV=1	POPTR_0001s35790g	ident	21.1	57.135	74.461	14	9	9
Cellular Component	GO:0005737	6	cytoplasm	1.58753e-182	A9PD73	Translational elongation factor 1 subunit Bbeta family protein	POPTR_0015s10630g	ident	37.4	25.107	94.299	17	7	5
Cellular Component	GO:0005737	6	cytoplasm	1.58753e-182	B9GLB6	Pyruvate kinase	POPTR_0001s03890g	ident	18.2	54.947	54.576	7	7	7
Cellular Component	GO:0005737	6	cytoplasm	1.58753e-182	B9GM71	ADP,ATP carrier protein, mitochondrial OS=Solanum tuberosum GN=ANT PE=2 SV=1	POPTR_0001s05690g	ident	11.2	42.061	-2	1	4	1
Cellular Component	GO:0005737	6	cytoplasm	1.58753e-182	B9I5Y4	T-complex protein 1 subunit theta OS=Arabidopsis thaliana GN=CCT8 PE=1 SV=1	POPTR_0013s05500g	ident	23.7	58.663	117.91	12	10	4
Cellular Component	GO:0005737	6	cytoplasm	1.58753e-182	A0A2K1X5I8	Biotin carboxyl carrier protein of acetyl-CoA carboxylase	POPTR_017G092500v3	ident	6.9	16.552	5.8989	1	1	1
Cellular Component	GO:0005737	6	cytoplasm	1.58753e-182	B9HXH9	REVERSIBLY GLYCOSYLATED POLYPEPTIDE 3 family protein	POPTR_0010s16420g	ident	32.4	40.868	75.813	7	9	5
Cellular Component	GO:0005737	6	cytoplasm	1.58753e-182	B9HAF5	E3 ubiquitin-protein ligase KEG OS=Arabidopsis thaliana GN=KEG PE=1 SV=2	POPTR_0006s27180g	ident	5.4	69.826	14.189	2	2	1
Cellular Component	GO:0005737	6	cytoplasm	1.58753e-182	B9GJJ8	60S ribosomal protein L9 OS=Oryza sativa subsp. japonica GN=RPL9 PE=2 SV=3	POPTR_0001s45820g	ident	30.1	21.934	195.23	12	8	1
Cellular Component	GO:0005737	6	cytoplasm	1.58753e-182	B9IH22	Chloroplastic RNA-binding protein P67	POPTR_0016s00860g	ident	8.6	78.711	35.256	6	5	4
Cellular Component	GO:0005737	6	cytoplasm	1.58753e-182	B9GSS4	Vacuolar protein sorting-associated protein 51 homolog OS=Xenopus tropicalis GN=vps51 PE=2 SV=1	POPTR_0002s19740g	ident	1.4	86.069	6.1413	1	1	1
Cellular Component	GO:0005737	6	cytoplasm	1.58753e-182	B9HVU8	DYNAMIN-LIKE protein 5	POPTR_0010s11630g	ident	14.5	68.741	31.57	4	6	4
Cellular Component	GO:0005737	6	cytoplasm	1.58753e-182	B9H3E2	NADH dehydrogenase [ubiquinone] iron-sulfur protein 1, mitochondrial OS=Solanum tuberosum PE=2 SV=1	POPTR_0004s08110g	ident	19.8	79.963	87.934	15	12	6
Cellular Component	GO:0005737	6	cytoplasm	1.58753e-182	A0A2K2AVG2	V-type proton ATPase subunit a	POPTR_004G160400v3	ident	3.5	90.165	12.483	2	2	2
Cellular Component	GO:0005737	6	cytoplasm	1.58753e-182	U5GD81	20 kDa chaperonin family protein	POPTR_0006s14080g	ident	42.6	26.858	176.39	11	8	5
Cellular Component	GO:0005737	6	cytoplasm	1.58753e-182	B9GT02	40S ribosomal protein S12	POPTR_0002s05710g	ident	44.1	15.325	45.978	6	5	3
Cellular Component	GO:0005737	6	cytoplasm	1.58753e-182	A9PDH8	mRNA for epsilon subunit of mitochondrial F1-ATPase family protein	POPTR_0010s25640g	ident	31.4	7.7528	13.092	3	2	2
Cellular Component	GO:0005737	6	cytoplasm	1.58753e-182	U5GAD6	Histidine--tRNA ligase, chloroplastic/mitochondrial OS=Arabidopsis thaliana GN=At3g46100 PE=2 SV=1	POPTR_0006s12640g	ident	4	56.473	11.729	2	2	2
Cellular Component	GO:0005737	6	cytoplasm	1.58753e-182	A0A2K2C1S0	Probable cytosolic iron-sulfur protein assembly protein CIAO1 homolog	POPTR_001G221000v3	ident	2.9	34.926	6.0225	1	1	1
Cellular Component	GO:0005737	6	cytoplasm	1.58753e-182	B9I013	Chlorophyll a-b binding protein, chloroplastic	POPTR_0011s12680g	ident	7.8	25.142	11.926	2	2	2
Cellular Component	GO:0005737	6	cytoplasm	1.58753e-182	U5G1W5	Bifunctional protein FolD 2 OS=Arabidopsis thaliana GN=FOLD2 PE=2 SV=1	POPTR_0011s10100g	ident	19.1	32.07	49.874	4	4	4
Cellular Component	GO:0005737	6	cytoplasm	1.58753e-182	U5G798	60S ribosomal protein L4-1 OS=Arabidopsis thaliana GN=RPL4A PE=1 SV=1	POPTR_0006s13470g	ident	26.7	41.553	20.248	3	10	3
Cellular Component	GO:0005737	6	cytoplasm	1.58753e-182	B9I6A6	Vacuolar protein sorting-associated protein 18 homolog OS=Danio rerio GN=vps18 PE=2 SV=2	POPTR_0013s14370g	ident	1.1	111.91	6.9013	1	1	1
Cellular Component	GO:0005737	6	cytoplasm	1.58753e-182	A0A2K1X5T6	Eukaryotic translation initiation factor 3 subunit M	POPTR_017G095300v3	ident	6.1	46.753	15.784	4	2	2
Cellular Component	GO:0005737	6	cytoplasm	1.58753e-182	B9GZT3	Potassium transporter	POPTR_0003s01820g	ident	2	95.355	5.9448	1	1	1
Cellular Component	GO:0005737	6	cytoplasm	1.58753e-182	B9MXC0	Uncharacterized protein	POPTR_0005s11090g	ident	27.9	23.806	37.462	6	4	4
Cellular Component	GO:0005737	6	cytoplasm	1.58753e-182	A0A2K1YKM0	50S ribosomal protein L11, chloroplastic OS=Arabidopsis thaliana GN=RPL11 PE=2 SV=1	POPTR_011G150700v3	ident	22.4	23.148	6.379	2	4	1
Cellular Component	GO:0005737	6	cytoplasm	1.58753e-182	B9HNJ3	Tubulin beta chain	POPTR_0009s07150g	ident	16.6	50.057	115.8	11	7	0
Cellular Component	GO:0005737	6	cytoplasm	1.58753e-182	B9GKG9	PIGMENT DEFECTIVE EMBRYO family protein	POPTR_0001s09480g	ident	1.4	85.322	7.1203	1	1	1
Cellular Component	GO:0005737	6	cytoplasm	1.58753e-182	B9GQG6	Tubulin gamma chain	POPTR_0002s16930g	ident	2	49.768	6.2997	1	1	1
Cellular Component	GO:0005737	6	cytoplasm	1.58753e-182	B9IF79	Aspartyl aminopeptidase family protein	POPTR_0015s10480g	ident	12.3	53.809	36.513	7	5	3
Cellular Component	GO:0005737	6	cytoplasm	1.58753e-182	A4GYN9	Photosystem II protein D1	psbA	ident	13.6	38.964	37.684	6	4	4
Cellular Component	GO:0005737	6	cytoplasm	1.58753e-182	A9PGV4	GLUCOSE HYPERSENSITIVE 1 family protein	POPTR_0001s33910g	ident	7.4	20.288	6.8657	1	1	1
Cellular Component	GO:0005737	6	cytoplasm	1.58753e-182	B9IQ92	Aspartate kinase family protein	POPTR_0019s10040g	ident	16.9	94.825	82.817	14	12	12
Cellular Component	GO:0005737	6	cytoplasm	1.58753e-182	A4GYT2	50S ribosomal protein L33, chloroplastic	rpl33	ident	15.2	7.8032	7.0916	1	1	1
Cellular Component	GO:0005737	6	cytoplasm	1.58753e-182	U5FM21	40S ribosomal protein S8	POPTR_0017s14180g	ident	25.1	24.922	49.523	8	4	4
Cellular Component	GO:0005737	6	cytoplasm	1.58753e-182	B9H5Q0	Probable prefoldin subunit 5 OS=Arabidopsis thaliana GN=At5g23290 PE=2 SV=1	POPTR_0005s09240g	ident	19.6	17.208	16.44	2	2	1
Cellular Component	GO:0005737	6	cytoplasm	1.58753e-182	U5FXQ5	Uncharacterized protein	POPTR_0013s11310g	ident	5.3	21.149	7.1676	1	1	1
Cellular Component	GO:0005737	6	cytoplasm	1.58753e-182	B9GRP5	Probable methyltransferase PMT8 OS=Arabidopsis thaliana GN=At1g04430 PE=2 SV=1	POPTR_0002s03810g	ident	19.7	69.504	72.552	10	8	3
Cellular Component	GO:0005737	6	cytoplasm	1.58753e-182	A0A2K1XQD3	10 kDa chaperonin 1, chloroplastic OS=Arabidopsis thaliana GN=CPN10-1 PE=2 SV=1	POPTR_014G044300v3	ident	21.9	14.956	26.211	3	2	2
Cellular Component	GO:0005737	6	cytoplasm	1.58753e-182	B9HRJ7	Late embryogenesis abundant protein OS=Raphanus sativus PE=2 SV=1	POPTR_0009s12290g	ident	23.5	19.465	35.938	2	2	2
Cellular Component	GO:0005737	6	cytoplasm	1.58753e-182	B9GH00	Tubulin beta chain	POPTR_0001s46870g	ident	16.6	50.056	7.1634	1	7	0
Cellular Component	GO:0005737	6	cytoplasm	1.58753e-182	B9I2B3	Mitochondrial import inner membrane translocase subunit Tim17/Tim22/Tim23 family protein	POPTR_0012s00400g	ident	14.9	27.979	11.214	2	3	2
Cellular Component	GO:0005737	6	cytoplasm	1.58753e-182	A9PFI4	Vacuolar protein sorting-associated protein 26A OS=Arabidopsis thaliana GN=VPS26A PE=2 SV=1	POPTR_0001s23020g	ident	8	35.076	12.827	2	2	2
Cellular Component	GO:0005737	6	cytoplasm	1.58753e-182	B9HN51	LL-diaminopimelate aminotransferase, chloroplastic OS=Arabidopsis thaliana GN=DAP PE=1 SV=1	POPTR_0009s08570g	ident	16.5	50.171	82.085	7	6	6
Cellular Component	GO:0005737	6	cytoplasm	1.58753e-182	B9GSX3	P II nitrogen sensing family protein	POPTR_0002s19200g	ident	10.4	21.953	14.143	2	2	2
Cellular Component	GO:0005737	6	cytoplasm	1.58753e-182	A0A2K1YCF4	40S ribosomal protein SA	POPTR_012G117600v3	ident	38.1	31.07	46.881	3	9	3
Cellular Component	GO:0005737	6	cytoplasm	1.58753e-182	B9HN61	Soluble inorganic pyrophosphatase 6, chloroplastic OS=Arabidopsis thaliana GN=PPA6 PE=1 SV=1	POPTR_0009s08480g	ident	6.7	33.415	16.887	3	3	3
Cellular Component	GO:0005737	6	cytoplasm	1.58753e-182	B9HJT1	Probable methyltransferase PMT2 OS=Arabidopsis thaliana GN=At1g26850 PE=2 SV=2	POPTR_0008s14720g	ident	7.3	69.33	25.302	4	4	4
Cellular Component	GO:0005737	6	cytoplasm	1.58753e-182	B9HJR1	Threonyl-tRNA synthetase family protein	POPTR_0008s14490g	ident	19	82.265	103.36	15	12	12
Cellular Component	GO:0005737	6	cytoplasm	1.58753e-182	U5GAP9	Ubiquinone biosynthesis protein COQ9, mitochondrial OS=Xenopus tropicalis GN=coq9 PE=2 SV=1	POPTR_0006s14200g	ident	12.1	35.581	29.951	4	3	3
Cellular Component	GO:0005737	6	cytoplasm	1.58753e-182	A9PAL5	40S ribosomal protein S9-2 OS=Arabidopsis thaliana GN=RPS9C PE=1 SV=1	POPTR_0006s22630g	ident	35	22.998	124.86	14	10	2
Cellular Component	GO:0005737	6	cytoplasm	1.58753e-182	B9HKQ7	Diphosphomevalonate decarboxylase	POPTR_0008s02200g	ident	11.3	45.655	7.5529	1	3	1
Cellular Component	GO:0005737	6	cytoplasm	1.58753e-182	B9HT60	Delta-1-pyrroline-5-carboxylate synthase	POPTR_0010s20590g	ident	13.4	77.774	70.568	9	8	5
Cellular Component	GO:0005737	6	cytoplasm	1.58753e-182	B9H981	Asparaginyl-tRNA synthetase family protein	POPTR_0006s15880g	ident	15.1	56.966	19.69	4	7	3
Cellular Component	GO:0005737	6	cytoplasm	1.58753e-182	B9HNV5	Xanthine dehydrogenase family protein	POPTR_0009s05940g	ident	1.1	148.32	9.7758	1	1	1
Cellular Component	GO:0005737	6	cytoplasm	1.58753e-182	U5FLM1	Pattern formation protein EMB30	POPTR_0017s11490g	ident	1	161.59	8.1863	1	1	1
Cellular Component	GO:0005737	6	cytoplasm	1.58753e-182	B9H5X2	Pyrophosphate--fructose 6-phosphate 1-phosphotransferase subunit alpha	PFP-ALPHA	ident	19.8	67.208	41.315	6	9	5
Cellular Component	GO:0005737	6	cytoplasm	1.58753e-182	B9HN33	Aspartate--tRNA ligase, chloroplastic/mitochondrial OS=Arabidopsis thaliana GN=At4g33760 PE=2 SV=1	POPTR_0009s08760g	ident	9.2	74.329	27.216	4	4	4
Cellular Component	GO:0005737	6	cytoplasm	1.58753e-182	A9PEI9	60S ribosomal protein L7-2	POPTR_0010s25740g	ident	38.5	28.405	152.8	12	9	1
Cellular Component	GO:0005737	6	cytoplasm	1.58753e-182	B9IQD7	Xylulose kinase OS=Pongo abelii GN=XYLB PE=2 SV=1	POPTR_0019s10630g	ident	18.4	60.547	69.704	8	8	8
Cellular Component	GO:0005737	6	cytoplasm	1.58753e-182	B9HB22	Leucine aminopeptidase family protein	POPTR_0006s19810g	ident	28.9	50.03	43.411	5	9	5
Cellular Component	GO:0005737	6	cytoplasm	1.58753e-182	A0A2K1YUR7	Erlin-2 OS=Bos taurus GN=ERLIN2 PE=2 SV=1	POPTR_010G158700v3	ident	5.7	40.066	12.37	3	2	2
Cellular Component	GO:0005737	6	cytoplasm	1.58753e-182	B9GU28	Delta-aminolevulinic acid dehydratase	POPTR_0002s08280g	ident	7.4	46.942	27.917	5	3	3
Cellular Component	GO:0005737	6	cytoplasm	1.58753e-182	B9GT13	4-hydroxyphenylpyruvate dioxygenase	POPTR_0002s05840g	ident	27	48.748	78.321	9	7	7
Cellular Component	GO:0005737	6	cytoplasm	1.58753e-182	B9I5K3	NADPH-protochlorophyllide oxidoreductase	POPTR_0013s13910g	ident	21.4	43.772	46.78	9	7	4
Cellular Component	GO:0005737	6	cytoplasm	1.58753e-182	A9PB80	Ribosomal protein 1	POPTR_0002s06680g	ident	22.4	44.532	5.9103	1	10	1
Cellular Component	GO:0005737	6	cytoplasm	1.58753e-182	B9HU05	50S ribosomal protein L10, chloroplastic OS=Nicotiana tabacum GN=RPL10 PE=2 SV=1	POPTR_0010s22290g	ident	15	25.478	52.756	4	3	3
Cellular Component	GO:0005737	6	cytoplasm	1.58753e-182	B9IJQ6	Ubiquitin carboxyl-terminal hydrolase	POPTR_0017s11160g	ident	4.2	38.348	7.9188	1	1	1
Cellular Component	GO:0005737	6	cytoplasm	1.58753e-182	A9PCL8	Copper transport protein ATX1 OS=Arabidopsis thaliana GN=ATX1 PE=1 SV=2	POPTR_0010s24290g	ident	31.8	8.9362	6.4806	1	2	1
Cellular Component	GO:0005737	6	cytoplasm	1.58753e-182	A9PEJ6	40S ribosomal protein S17	POPTR_0008s01820g	ident	22.9	16.061	40.756	13	6	6
Cellular Component	GO:0005737	6	cytoplasm	1.58753e-182	U5GE99	Zeta-carotene desaturase	POPTR_0005s05230g	ident	2	64.852	6.3555	1	1	1
Cellular Component	GO:0005737	6	cytoplasm	1.58753e-182	B9GMG3	Dehydratase family protein	POPTR_0001s14300g	ident	12.9	65.797	-2	1	7	1
Cellular Component	GO:0005737	6	cytoplasm	1.58753e-182	A9PCQ5	Pseudouridine synthase and archaeosine transglycosylase domain-containing family protein	POPTR_0005s02340g	ident	11	20.122	11.019	2	2	2
Cellular Component	GO:0005737	6	cytoplasm	1.58753e-182	B9HWA2	ATP synthase subunit beta	POPTR_0010s12680g	ident	46.2	59.81	323.31	54	19	18
Cellular Component	GO:0005737	6	cytoplasm	1.58753e-182	A9P7V6	Triosephosphate isomerase family protein	POPTR_0010s21100g	ident	43.3	27.184	133.36	14	9	6
Cellular Component	GO:0005737	6	cytoplasm	1.58753e-182	B9HFR1	Phosphoenolpyruvate carboxykinase family protein	POPTR_0007s14250g	ident	34.6	73.307	210.42	28	16	14
Cellular Component	GO:0005737	6	cytoplasm	1.58753e-182	B9H1L0	Importin beta-2 subunit family protein	POPTR_0004s18420g	ident	9.3	98.784	47.852	7	7	7
Cellular Component	GO:0005737	6	cytoplasm	1.58753e-182	B9IIY9	60S ribosomal protein L1	POPTR_0016s08520g	ident	28.7	44.968	84.115	17	11	4
Cellular Component	GO:0005737	6	cytoplasm	1.58753e-182	U5GW75	50S ribosomal protein L13, chloroplastic OS=Arabidopsis thaliana GN=RPL13 PE=2 SV=1	POPTR_0001s39310g	ident	15.7	28.094	72.259	7	2	2
Cellular Component	GO:0005737	6	cytoplasm	1.58753e-182	U5GKM7	Superoxide dismutase [Cu-Zn]	POPTR_0004s22620g	ident	29.8	22.042	99.484	6	2	2
Cellular Component	GO:0005737	6	cytoplasm	1.58753e-182	U5FMV2	Light-harvesting complex-like protein 3 isotype 1, chloroplastic OS=Arabidopsis thaliana GN=LIL3.1 PE=1 SV=1	POPTR_0015s12260g	ident	12.6	28.546	22.429	3	3	3
Cellular Component	GO:0005737	6	cytoplasm	1.58753e-182	B9N5P8	Obg-like ATPase 1	POPTR_0011s16690g	ident	22.3	44.658	6.0468	1	7	1
Cellular Component	GO:0005737	6	cytoplasm	1.58753e-182	B9IA95	Eukaryotic translation initiation factor 3 subunit H	POPTR_0014s14420g	ident	19.4	39.214	46.013	7	6	6
Cellular Component	GO:0005737	6	cytoplasm	1.58753e-182	A9P8F6	40S ribosomal protein S27	POPTR_0001s12840g	ident	37.2	9.6301	37.155	9	4	4
Cellular Component	GO:0005737	6	cytoplasm	1.58753e-182	A9PCW7	40S ribosomal protein S15a-5 OS=Arabidopsis thaliana GN=RPS15AE PE=2 SV=1	POPTR_0009s07560g	ident	14	14.842	11.884	2	2	2
Cellular Component	GO:0005737	6	cytoplasm	1.58753e-182	U5GHX9	Alpha-1,4 glucan phosphorylase	POPTR_0004s04830g	ident	10.3	83.567	52.017	5	5	5
Cellular Component	GO:0005737	6	cytoplasm	1.58753e-182	A9PCT1	50S ribosomal protein L24, chloroplastic OS=Nicotiana tabacum GN=RPL24 PE=1 SV=1	POPTR_0001s44110g	ident	11.9	21.549	28.889	4	2	2
Cellular Component	GO:0005737	6	cytoplasm	1.58753e-182	B9HLP2	Elongation factor 1-alpha	POPTR_0008s04270g	ident	38.1	49.508	197.56	51	14	3
Cellular Component	GO:0005737	6	cytoplasm	1.58753e-182	B9MZ75	RUBISCO SUBUNIT BINDING-protein ALPHA SUBUNIT	POPTR_0004s22340g	ident	15.5	62.04	13.587	2	8	2
Cellular Component	GO:0005737	6	cytoplasm	1.58753e-182	B9INC6	20 kDa chaperonin family protein	POPTR_0018s07410g	ident	42.6	27.115	111.83	18	10	7
Cellular Component	GO:0005737	6	cytoplasm	1.58753e-182	U5GEJ6	Proline--tRNA ligase, chloroplastic/mitochondrial OS=Arabidopsis thaliana GN=OVA6 PE=2 SV=1	POPTR_0004s07710g	ident	3.1	47.543	8.1976	1	1	1
Cellular Component	GO:0005737	6	cytoplasm	1.58753e-182	U5FYF4	10 kDa chaperonin, mitochondrial OS=Arabidopsis thaliana GN=CPN10 PE=1 SV=1	POPTR_0010s12180g	ident	54.9	8.617	30.457	6	4	2
Cellular Component	GO:0005737	6	cytoplasm	1.58753e-182	B9ICA8	K(+) efflux antiporter 2, chloroplastic OS=Arabidopsis thaliana GN=KEA2 PE=1 SV=2	POPTR_0014s07660g	ident	3.1	130.7	20.806	3	3	3
Cellular Component	GO:0005737	6	cytoplasm	1.58753e-182	B9N3Q0	Transaldolase OS=Histophilus somni (strain 2336) GN=tal PE=3 SV=1	POPTR_0001s00260g	ident	10.3	43.04	34.723	5	4	4
Cellular Component	GO:0005737	6	cytoplasm	1.58753e-182	B9IJ11	Importin subunit alpha	POPTR_0016s08790g	ident	3.6	56.598	13.014	2	2	2
Cellular Component	GO:0005737	6	cytoplasm	1.58753e-182	U5GIF1	Uncharacterized protein	POPTR_0004s11090g	ident	14.3	9.4736	6.9884	1	1	1
Cellular Component	GO:0005737	6	cytoplasm	1.58753e-182	B9H106	Pentatricopeptide repeat-containing protein At3g53700, chloroplastic OS=Arabidopsis thaliana GN=MEE40 PE=2 SV=1	POPTR_0004s01330g	ident	1.1	85.198	5.7964	1	1	1
Cellular Component	GO:0005737	6	cytoplasm	1.58753e-182	B9HLJ3	Probable acetyltransferase NATA1-like OS=Arabidopsis thaliana GN=At2g39020 PE=2 SV=1	POPTR_0008s03740g	ident	9.7	25.989	20.275	2	2	2
Cellular Component	GO:0005737	6	cytoplasm	1.58753e-182	B9HBA8	Biotin carboxylase 1, chloroplastic	POPTRDRAFT_831870	ident	31.8	57.707	122.43	16	13	6
Cellular Component	GO:0005737	6	cytoplasm	1.58753e-182	A0A2K1ZA60	Exocyst complex component EXO70A1 OS=Arabidopsis thaliana GN=EXO70A1 PE=1 SV=1	POPTR_008G017800v3	ident	3.1	47.291	7.2368	1	1	1
Cellular Component	GO:0005737	6	cytoplasm	1.58753e-182	U5FYH8	Biogenesis of lysosome-related organelles complex 1 subunit 1 OS=Arabidopsis thaliana GN=BLOS1 PE=1 SV=1	POPTR_0013s15260g	ident	8.7	16.993	5.9305	1	1	1
Cellular Component	GO:0005737	6	cytoplasm	1.58753e-182	A0A2K1ZEW8	30S ribosomal protein S6 OS=Alcanivorax borkumensis (strain ATCC 700651 / DSM 11573 / NCIMB 13689 / SK2)GN=rpsF PE=3 SV=1	POPTR_008G101900v3	ident	3.8	34.125	6.4932	1	1	1
Cellular Component	GO:0005737	6	cytoplasm	1.58753e-182	B9I2L6	CRM-domain containing factor CFM3, chloroplastic/mitochondrial OS=Zea mays GN=CFM3 PE=1 SV=1	POPTR_0012s05260g	ident	5.7	91.311	25.368	4	4	4
Cellular Component	GO:0005737	6	cytoplasm	1.58753e-182	A9PB99	NADH-ubiquinone oxidoreductase 19 kDa subunit family protein	POPTR_0008s20110g	ident	15.9	12.031	12.291	2	2	2
Cellular Component	GO:0005737	6	cytoplasm	1.58753e-182	B9HGN8	ADP,ATP carrier protein 3, mitochondrial OS=Arabidopsis thaliana GN=AAC3 PE=1 SV=1	POPTR_0007s01010g	ident	16.6	41.07	24.247	5	6	3
Cellular Component	GO:0005737	6	cytoplasm	1.58753e-182	A9PCH3	60S ribosomal protein L35	POPTR_0006s23060g	ident	13.8	14.338	6.0746	1	2	1
Cellular Component	GO:0005737	6	cytoplasm	1.58753e-182	B9HQ38	Nicalin	POPTR_0009s16200g	ident	10	63.819	22.798	3	4	3
Cellular Component	GO:0005737	6	cytoplasm	1.58753e-182	B9N9I7	Aquaporin TIP-type alpha family protein	POPTR_0017s03540g	ident	2.7	27.407	5.6229	1	1	1
Cellular Component	GO:0005737	6	cytoplasm	1.58753e-182	A0A2K2C3Z6	Ribosomal protein	POPTR_001G262400v3	ident	29.9	37.715	15.328	3	9	2
Cellular Component	GO:0005737	6	cytoplasm	1.58753e-182	A0A2K1Y4Z5	30S ribosomal protein S16-1, chloroplastic OS=Arabidopsis thaliana GN=RPS16-1 PE=2 SV=1	POPTR_013G128200v3	ident	43.6	12.001	48.245	9	4	4
Cellular Component	GO:0005737	6	cytoplasm	1.58753e-182	A4GYR6	ATP synthase epsilon chain, chloroplastic	atpE	ident	7.5	14.564	5.6267	1	1	1
Cellular Component	GO:0005737	6	cytoplasm	1.58753e-182	A0A2K2AVT8	Translocon-associated protein subunit alpha OS=Arabidopsis thaliana GN=At2g21160 PE=2 SV=3	POPTR_004G168500v3	ident	12.3	24.707	17.954	4	2	2
Cellular Component	GO:0005737	6	cytoplasm	1.58753e-182	A0A2K1ZEV8	30S ribosomal protein S1, chloroplastic OS=Spinacia oleracea GN=RPS1 PE=1 SV=1	POPTR_008G101100v3	ident	26.7	39.425	57.615	15	8	7
Cellular Component	GO:0005737	6	cytoplasm	1.58753e-182	B9IMW5	Probable clathrin assembly protein At4g32285 OS=Arabidopsis thaliana GN=At4g32285 PE=1 SV=2	POPTR_0018s12830g	ident	2.9	68.761	8.7401	1	1	1
Cellular Component	GO:0005737	6	cytoplasm	1.58753e-182	A9PE68	Triosephosphate isomerase family protein	POPTR_0008s05640g	ident	32.7	27.259	131.47	8	7	5
Cellular Component	GO:0005737	6	cytoplasm	1.58753e-182	A9PC08	40S ribosomal protein S5	POPTR_0016s06310g	ident	22.2	22.927	49.976	16	5	5
Cellular Component	GO:0005737	6	cytoplasm	1.58753e-182	U5GQU7	Uncharacterized protein	POPTR_0003s14620g	ident	3	56.375	8.2706	1	1	1
Cellular Component	GO:0005737	6	cytoplasm	1.58753e-182	A0A2K2ACW7	40S ribosomal protein S6 OS=Asparagus officinalis GN=rps6 PE=2 SV=1	POPTR_005G072700v3	ident	10.8	22.266	12.842	3	2	2
Cellular Component	GO:0005737	6	cytoplasm	1.58753e-182	U5GXD4	Phosphoenolpyruvate carboxylase family protein	POPTR_0001s40250g	ident	20.9	110.76	130.86	20	17	7
Cellular Component	GO:0005737	6	cytoplasm	1.58753e-182	A9PF58	Chaperonin 60 subunit beta 2, chloroplastic OS=Arabidopsis thaliana GN=CPN60B2 PE=1 SV=1	POPTR_0001s03980g	ident	33.1	64.244	273.05	35	17	3
Cellular Component	GO:0005737	6	cytoplasm	1.58753e-182	B9IAF0	Ribosomal protein L6	POPTR_0014s15120g	ident	29.5	25.363	45.293	11	7	7
Cellular Component	GO:0005737	6	cytoplasm	1.58753e-182	U5GDA1	Proteasome subunit alpha type	POPTR_0006s14260g	ident	41.1	27.312	76.512	16	9	3
Cellular Component	GO:0005737	6	cytoplasm	1.58753e-182	B9MTD0	Isocitrate dehydrogenase [NAD] subunit, mitochondrial	POPTR_0006s12860g	ident	10.3	39.252	6.764	1	3	1
Cellular Component	GO:0005737	6	cytoplasm	1.58753e-182	B9GY72	Importin-5 OS=Mus musculus GN=Ipo5 PE=1 SV=3	POPTR_0003s21100g	ident	6.8	123.55	46.849	9	7	5
Cellular Component	GO:0005737	6	cytoplasm	1.58753e-182	B9HEW3	Succinate dehydrogenase [ubiquinone] flavoprotein subunit, mitochondrial	POPTR_0007s12750g	ident	27.2	69.859	198.88	11	11	6
Cellular Component	GO:0005737	6	cytoplasm	1.58753e-182	B9HAR1	Putative SNARE family protein	POPTR_0006s20190g	ident	10.6	22.639	12.308	2	2	2
Cellular Component	GO:0005737	6	cytoplasm	1.58753e-182	B9IFP1	Isocitrate dehydrogenase [NAD] subunit, mitochondrial	POPTR_0016s09240g	ident	12.7	39.574	33.31	6	4	2
Cellular Component	GO:0005737	6	cytoplasm	1.58753e-182	U7E1M6	Plant UBX domain-containing protein 4 OS=Arabidopsis thaliana GN=PUX4 PE=1 SV=1	POPTR_0021s00560g	ident	9.5	27.423	11.846	2	2	2
Cellular Component	GO:0005737	6	cytoplasm	1.58753e-182	B9HFC1	Glutaredoxin family protein	POPTR_0007s13630g	ident	7.5	14.838	6.4528	2	1	1
Cellular Component	GO:0005737	6	cytoplasm	1.58753e-182	A4GYQ5	Photosystem II CP43 reaction center protein	psbC	ident	9.9	51.805	29.756	4	3	3
Cellular Component	GO:0005737	6	cytoplasm	1.58753e-182	B9HHL1	Microsomal signal peptidase 25 kDa subunit family protein	POPTR_0008s06490g	ident	18.5	21.268	25.69	4	4	4
Cellular Component	GO:0005737	6	cytoplasm	1.58753e-182	A0A2K1YPP2	60S ribosomal protein L17-2 OS=Arabidopsis thaliana GN=RPL17B PE=2 SV=2	POPTR_010G060400v3	ident	9.7	20.168	20.46	3	3	2
Cellular Component	GO:0005737	6	cytoplasm	1.58753e-182	U5GC96	Dolichyl-diphosphooligosaccharide--protein glycosyltransferase 48 kDa subunit	POPTR_0005s12850g	ident	10.5	48.957	8.3893	1	4	1
Cellular Component	GO:0005737	6	cytoplasm	1.58753e-182	B9HBM5	Ribonuclease II, chloroplastic/mitochondrial OS=Arabidopsis thaliana GN=RNR1 PE=2 SV=1	POPTR_0006s08640g	ident	6.1	88.816	23.022	4	4	4
Cellular Component	GO:0005737	6	cytoplasm	1.58753e-182	B9GH07	Histidinol dehydrogenase, chloroplastic	POPTR_0001s46960g	ident	6.6	47.767	15.757	2	2	2
Cellular Component	GO:0005737	6	cytoplasm	1.58753e-182	B9IJG0	Acetylornithine aminotransferase, mitochondrial OS=Alnus glutinosa GN=AG118 PE=2 SV=1	POPTR_0017s08060g	ident	6	48.728	15.352	2	2	2
Cellular Component	GO:0005737	6	cytoplasm	1.58753e-182	B9I7S1	Protein AUXIN RESPONSE 4 OS=Arabidopsis thaliana GN=AXR4 PE=2 SV=1	POPTR_0013s02240g	ident	6.4	48.394	11.769	2	2	2
Cellular Component	GO:0005737	6	cytoplasm	1.58753e-182	A9PBK6	40s ribosomal protein S23	POPTR_0006s13370g	ident	8.5	15.711	14.538	3	2	2
Cellular Component	GO:0005737	6	cytoplasm	1.58753e-182	A0A2K1ZBA6	Phenylalanine ammonia-lyase	POPTR_008G038200v3	ident	5.7	76.551	19.165	3	3	3
Cellular Component	GO:0005737	6	cytoplasm	1.58753e-182	B9GYB6	Protein transport protein sec16	POPTR_0003s07480g	ident	1	147.86	8.5882	1	1	1
Cellular Component	GO:0005737	6	cytoplasm	1.58753e-182	B9HJC1	10 kDa chaperonin, mitochondrial OS=Arabidopsis thaliana GN=CPN10 PE=1 SV=1	POPTR_0008s12950g	ident	29.9	10.451	8.5277	1	3	1
Cellular Component	GO:0005737	6	cytoplasm	1.58753e-182	A0A2K1WRQ6	Exocyst complex component SEC6 OS=Arabidopsis thaliana GN=SEC6 PE=1 SV=1	POPTR_019G088100v3	ident	3.6	80.257	16.865	2	2	2
Cellular Component	GO:0005737	6	cytoplasm	1.58753e-182	B9GIX1	Mitochondrial import inner membrane translocase subunit TIM10 OS=Arabidopsis thaliana GN=TIM10 PE=1 SV=1	POPTR_0001s25370g	ident	11.9	7.7019	5.7813	2	1	1
Cellular Component	GO:0005737	6	cytoplasm	1.58753e-182	A9PHW0	40S ribosomal protein S3-3 OS=Arabidopsis thaliana GN=RPS3C PE=1 SV=1	POPTR_012G076800v3	ident	43.5	25.95	100.25	15	10	10
Cellular Component	GO:0005737	6	cytoplasm	1.58753e-182	B9H8U4	Ferredoxin-dependent glutamate synthase family protein	POPTR_0006s03660g	ident	14.3	177.27	204.76	18	17	6
Cellular Component	GO:0005737	6	cytoplasm	1.58753e-182	A9PHY6	Eukaryotic translation initiation factor 3 subunit E	POPTR_0006s04620g	ident	34.8	51.29	105.91	14	12	6
Cellular Component	GO:0005737	6	cytoplasm	1.58753e-182	A4GYV1	30S ribosomal protein S19, chloroplastic	rps19-1	ident	42.4	10.523	25.594	5	4	4
Cellular Component	GO:0005737	6	cytoplasm	1.58753e-182	B9IAZ9	Ribonuclease 2 OS=Arabidopsis thaliana GN=RNS2 PE=2 SV=1	POPTR_0014s17280g	ident	3.7	29.9	6.5782	1	1	1
Cellular Component	GO:0005737	6	cytoplasm	1.58753e-182	A9P8S1	Ribosomal protein S16	POPTR_0001s31210g	ident	47.9	16.567	20.872	1	8	1
Cellular Component	GO:0005737	6	cytoplasm	1.58753e-182	A9P802	Porin family protein	POPTR_0010s04240g	ident	18.5	29.499	58.587	8	7	6
Cellular Component	GO:0005737	6	cytoplasm	1.58753e-182	B9GME7	Glutathione-disulfide reductase family protein	POPTR_0001s14480g	ident	21.2	54.188	39.439	5	8	4
Cellular Component	GO:0005737	6	cytoplasm	1.58753e-182	B9H9L0	60S ribosomal protein L27a-2	POPTR_0006s21680g	ident	32.2	16.487	5.6733	0	4	1
Cellular Component	GO:0005737	6	cytoplasm	1.58753e-182	A9PE08	Ribosomal protein S13	POPTR_0002s14780g	ident	31.8	17.073	32.24	6	4	1
Cellular Component	GO:0005737	6	cytoplasm	1.58753e-182	U5G3W6	Malate dehydrogenase	POPTR_0010s08180g	ident	23	33.365	12.094	3	5	2
Cellular Component	GO:0005737	6	cytoplasm	1.58753e-182	A9P8P1	RAN BINDING protein 1	POPTR_0001s28550g	ident	16.5	24.393	67.641	3	2	2
Cellular Component	GO:0005737	6	cytoplasm	1.58753e-182	B9HJM0	Eukaryotic translation initiation factor 3 subunit I	POPTR_0008s14090g	ident	23	35.738	6.2346	2	4	1
Cellular Component	GO:0005737	6	cytoplasm	1.58753e-182	B9I4Z5	STAUROSPORIN AND TEMPERATURE SENSITIVE 3-LIKE B family protein	POPTR_0012s00900g	ident	5.2	83.577	5.6109	1	3	1
Cellular Component	GO:0005737	6	cytoplasm	1.58753e-182	U5FWD6	Cysteine synthase	POPTR_0013s13150g	ident	32.1	42.706	149.56	18	10	10
Cellular Component	GO:0005737	6	cytoplasm	1.58753e-182	A0A2K1ZFT9	30S ribosomal protein 3-1, chloroplastic OS=Arabidopsis thaliana GN=At1g68590 PE=2 SV=1	POPTR_008G118700v3	ident	6.6	20.566	5.7833	1	1	1
Cellular Component	GO:0005737	6	cytoplasm	1.58753e-182	B9IJY7	FtsH protease family protein	POPTR_0017s12030g	ident	4.9	73.177	7.1599	1	3	1
Cellular Component	GO:0005737	6	cytoplasm	1.58753e-182	B9GP43	Malic enzyme	POPTR_0002s13630g	ident	5.6	69.741	19.122	5	3	3
Cellular Component	GO:0005737	6	cytoplasm	1.58753e-182	U5GFG5	Probable N-acetyl-gamma-glutamyl-phosphate reductase, chloroplastic OS=Arabidopsis thaliana GN=At2g19940 PE=1 SV=2	POPTR_0004s15290g	ident	12.8	43.435	26.825	5	4	4
Cellular Component	GO:0005737	6	cytoplasm	1.58753e-182	B9GXY0	Chaperonin family protein	POPTR_0003s20870g	ident	29.8	64.543	20.435	2	15	1
Cellular Component	GO:0005737	6	cytoplasm	1.58753e-182	U5GM23	Pentatricopeptide repeat-containing protein At5g46580, chloroplastic OS=Arabidopsis thaliana GN=At5g46580 PE=2 SV=1	POPTR_0003s08800g	ident	10	81.198	41.858	7	6	6
Cellular Component	GO:0005737	6	cytoplasm	1.58753e-182	A9PCW9	60S ribosomal protein L17-1	POPTR_0012s09860g	ident	16	20.406	6.8295	2	2	1
Cellular Component	GO:0005737	6	cytoplasm	1.58753e-182	A0A2K2BGG6	Cytochrome c oxidase subunit 6b-1 OS=Arabidopsis thaliana GN=COX6B-1 PE=1 SV=1	POPTR_002G100000v3	ident	9.7	19.489	15.947	1	1	1
Cellular Component	GO:0005737	6	cytoplasm	1.58753e-182	A9PAG0	Proteasome subunit alpha type	POPTR_0012s14980g	ident	56.2	25.625	134.71	16	11	11
Cellular Component	GO:0005737	6	cytoplasm	1.58753e-182	A4GYS0	Acetyl-coenzyme A carboxylase carboxyl transferase subunit beta, chloroplastic	accD	ident	12.2	56.21	45.929	7	5	5
Cellular Component	GO:0005737	6	cytoplasm	1.58753e-182	A9PGG9	V-type proton ATPase subunit G OS=Citrus limon GN=VATG PE=3 SV=1	POPTR_008G040300v3	ident	13.9	8.9681	7.8042	2	1	1
Cellular Component	GO:0005737	6	cytoplasm	1.58753e-182	A0A2K1ZCD6	Probable dual-specificity RNA methyltransferase RlmN OS=Synechococcus sp. (strain JA-3-3Ab) GN=rlmN PE=3 SV=1	POPTR_008G056500v3	ident	10.8	46.139	26.422	4	4	4
Cellular Component	GO:0005737	6	cytoplasm	1.58753e-182	A9P875	Copper transport protein ATX1 OS=Arabidopsis thaliana GN=ATX1 PE=1 SV=2	POPTR_0008s02430g	ident	32.1	8.7841	15.32	3	2	1
Cellular Component	GO:0005737	6	cytoplasm	1.58753e-182	B9I6P4	Golgi apparatus membrane protein TVP23	POPTR_0013s00770g	ident	7.7	20.866	10.245	1	1	1
Cellular Component	GO:0005737	6	cytoplasm	1.58753e-182	A9PGD8	Uricase	POPTR_0010s24880g	ident	29.9	35.033	51.348	8	8	8
Cellular Component	GO:0005737	6	cytoplasm	1.58753e-182	B9HLK4	Dolichyl-diphosphooligosaccharide--protein glycosyltransferase subunit 1	POPTR_0008s03860g	ident	16.2	52.53	29.59	6	5	5
Cellular Component	GO:0005737	6	cytoplasm	1.58753e-182	B9H7W2	40S ribosomal protein S18	POPTR_0005s21860g	ident	27.6	17.581	12.255	1	4	1
Cellular Component	GO:0005737	6	cytoplasm	1.58753e-182	A9PE75	Chlorophyll a-b binding protein, chloroplastic	POPTR_0014s17070g	ident	15.7	29.605	14.206	2	2	2
Cellular Component	GO:0005737	6	cytoplasm	1.58753e-182	A9P8K6	40S ribosomal protein S11	POPTR_0014s05220g	ident	14.5	17.917	10.771	2	2	1
Cellular Component	GO:0005737	6	cytoplasm	1.58753e-182	A9PI77	Ribosomal protein	POPTR_0007s11960g	ident	21.3	24.385	17.749	5	5	2
Cellular Component	GO:0005737	6	cytoplasm	1.58753e-182	A9PA48	Tic20 family protein	POPTR_0013s08250g	ident	6.2	23.218	7.3359	1	1	1
Cellular Component	GO:0005737	6	cytoplasm	1.58753e-182	B9IQ19	Putative IPP isomerase family protein	POPTR_0019s08090g	ident	17.1	26.874	19.853	3	3	3
Cellular Component	GO:0005737	6	cytoplasm	1.58753e-182	A4GYT5	30S ribosomal protein S12-A, chloroplastic	rps12-A	ident	17.1	13.639	12.843	2	2	2
Cellular Component	GO:0005737	6	cytoplasm	1.58753e-182	B9HJA3	Nicotinate-nucleotide pyrophosphorylase [carboxylating]	POPTR_0008s12790g	ident	4	36.122	8.0486	1	1	1
Cellular Component	GO:0005737	6	cytoplasm	1.58753e-182	B9I2I4	T-complex protein 1 subunit delta	POPTR_0012s04860g	ident	20.7	57.368	6.4023	1	9	1
Cellular Component	GO:0005737	6	cytoplasm	1.58753e-182	A9PGT3	Amidohydrolase family protein	POPTR_0003s16600g	ident	12.3	33.124	24.582	5	3	3
Cellular Component	GO:0005737	6	cytoplasm	1.58753e-182	A0A2K1YXW6	60S ribosomal protein L35 OS=Euphorbia esula GN=RPL35 PE=2 SV=1	POPTR_010G212300v3	ident	9.7	11.87	12.316	2	2	1
Cellular Component	GO:0005737	6	cytoplasm	1.58753e-182	B9ILF4	Coatomer subunit beta	POPTR_0018s03560g	ident	8.2	105.98	33.295	4	6	3
Cellular Component	GO:0005737	6	cytoplasm	1.58753e-182	A9P978	60S ribosomal protein L38	POPTR_0010s18850g	ident	53.6	8.0765	6.7098	1	4	1
Cellular Component	GO:0005737	6	cytoplasm	1.58753e-182	B9I2N0	Enolase family protein	POPTR_0012s05410g	ident	14.4	46.261	31.184	4	4	4
Cellular Component	GO:0005737	6	cytoplasm	1.58753e-182	B9GMI8	Chaperonin CPN60-2 family protein	POPTR_0001s14040g	ident	23.7	60.99	19.326	1	10	0
Cellular Component	GO:0005737	6	cytoplasm	1.58753e-182	B9HU06	Hydrolase family protein	POPTR_0010s22300g	ident	2.1	46.794	5.7046	1	1	1
Cellular Component	GO:0005737	6	cytoplasm	1.58753e-182	U5GS58	Mitochondrial carnitine/acylcarnitine carrier-like family protein	POPTR_0001s02500g	ident	15.5	30.343	24.822	4	4	4
Cellular Component	GO:0005737	6	cytoplasm	1.58753e-182	B9N135	Acyl carrier protein	POPTR_0013s08220g	ident	13.6	14.646	11.407	1	1	1
Cellular Component	GO:0005737	6	cytoplasm	1.58753e-182	B9HWX5	GTP-binding protein Sar1	POPTR_0010s15180g	ident	35.2	22.016	62.594	9	5	3
Cellular Component	GO:0005737	6	cytoplasm	1.58753e-182	U5G9I9	GTP-binding protein SAR1A OS=Arabidopsis thaliana GN=SAR1A PE=2 SV=1	POPTR_0005s01900g	ident	35.2	22.05	11.459	2	5	2
Cellular Component	GO:0005737	6	cytoplasm	1.58753e-182	U5GN11	Alpha,alpha-trehalose-phosphate synthase [UDP-forming] 5 OS=Arabidopsis thaliana GN=TPS5 PE=1 SV=2	POPTR_0001s02190g	ident	5.2	97.118	11.468	1	3	1
Cellular Component	GO:0005737	6	cytoplasm	1.58753e-182	A0A2K2AKW9	Dolichyl-diphosphooligosaccharide--protein glycosyltransferase subunit 2 OS=Arabidopsis thaliana GN=RPN2 PE=1 SV=1	POPTR_005G226100v3	ident	13.7	74.813	58.515	9	9	8
Cellular Component	GO:0005737	6	cytoplasm	1.58753e-182	A9P7U1	Eukaryotic translation initiation factor 3 subunit G	POPTR_0008s06040g	ident	24.9	32.534	85.299	7	6	6
Cellular Component	GO:0005737	6	cytoplasm	1.58753e-182	A9PCP1	Ubiquitin-conjugating enzyme family protein	POPTR_0006s22210g	ident	39.7	16.621	43.341	4	4	3
Cellular Component	GO:0005737	6	cytoplasm	1.58753e-182	B9GI50	Monodehydroascorbate reductase family protein	POPTR_0001s35220g	ident	2.1	52.189	9.6756	1	1	1
Cellular Component	GO:0005737	6	cytoplasm	1.58753e-182	B9HYB2	Inosine-5'-monophosphate dehydrogenase	POPTR_0010s18080g	ident	8.4	53.454	5.7031	1	4	1
Cellular Component	GO:0005737	6	cytoplasm	1.58753e-182	U5FR48	Flap endonuclease 1	FEN1	ident	3.4	46.335	8.671	1	1	1
Cellular Component	GO:0005737	6	cytoplasm	1.58753e-182	B9ILQ4	Elongation factor Ts, mitochondrial	EFTS	ident	16.4	107.83	120.96	16	13	2
Cellular Component	GO:0005737	6	cytoplasm	1.58753e-182	A9PCX2	60S ribosomal protein L21	POPTR_0003s15780g	ident	11	18.753	5.6473	1	2	0
Cellular Component	GO:0005737	6	cytoplasm	1.58753e-182	A0A2K1WU99	Eukaryotic translation initiation factor 3 subunit B	POPTR_018G015200v3	ident	21.3	64.28	13.441	2	12	2
Cellular Component	GO:0005737	6	cytoplasm	1.58753e-182	U5FNA4	Adenine phosphoribosyltransferase 1, chloroplastic OS=Arabidopsis thaliana GN=APT1 PE=1 SV=2	POPTR_0014s01740g	ident	13.7	19.963	13.574	2	2	2
Cellular Component	GO:0005737	6	cytoplasm	1.58753e-182	A9PBW0	60S ribosomal protein L12	POPTR_0018s14210g	ident	33.9	17.645	37.731	8	4	4
Cellular Component	GO:0005737	6	cytoplasm	1.58753e-182	A0A2K2B8M4	Chaperonin CPN60-2, mitochondrial OS=Cucurbita maxima GN=CPN60-2 PE=1 SV=1	POPTR_003G173900v3	ident	25.4	61.175	96.723	21	13	3
Cellular Component	GO:0005737	6	cytoplasm	1.58753e-182	B9H5U9	Dolichyl-diphosphooligosaccharide--protein glycosyltransferase subunit 1	POPTR_0005s27640g	ident	16.6	69.08	68.913	10	9	3
Cellular Component	GO:0005737	6	cytoplasm	1.58753e-182	A9P9A0	40S ribosomal protein S16	POPTR_0008s14940g	ident	57.6	16.402	60.008	17	9	2
Cellular Component	GO:0005737	6	cytoplasm	1.58753e-182	B9HWR9	Chaperonin 60 subunit beta 4, chloroplastic OS=Arabidopsis thaliana GN=CPN60B4 PE=1 SV=1	POPTR_0010s14520g	ident	4.1	63.045	15.33	2	2	2
Cellular Component	GO:0005737	6	cytoplasm	1.58753e-182	B9GYD6	Acyl-coenzyme A oxidase	POPTR_0003s07690g	ident	18.1	74.323	85.422	15	11	6
Cellular Component	GO:0005737	6	cytoplasm	1.58753e-182	A9P8N4	Profilin	POPTR_0006s25180g	ident	24.4	13.972	20.452	4	2	2
Cellular Component	GO:0005737	6	cytoplasm	1.58753e-182	B9IG89	Mitochondrial substrate carrier family protein	POPTR_0016s12280g	ident	3.1	42.847	5.9953	1	1	1
Cellular Component	GO:0005737	6	cytoplasm	1.58753e-182	A9PC05	40S ribosomal protein S24	POPTR_0010s09820g	ident	26.9	15.332	14.763	3	4	1
Cellular Component	GO:0005737	6	cytoplasm	1.58753e-182	B9I742	V-type proton ATPase subunit H OS=Arabidopsis thaliana GN=VHA-H PE=1 SV=1	POPTR_0013s07630g	ident	5	45.436	12.444	2	2	2
Cellular Component	GO:0005737	6	cytoplasm	1.58753e-182	B9N049	Nuclear transport factor 2 family protein	POPTR_0015s06970g	ident	15.8	42.484	33.451	3	3	2
Cellular Component	GO:0005737	6	cytoplasm	1.58753e-182	B9IBY8	40S ribosomal protein S13-2	POPTR_0014s06420g	ident	31.8	17.107	5.8011	1	4	1
Cellular Component	GO:0005737	6	cytoplasm	1.58753e-182	B9I5C3	Pentatricopeptide repeat-containing protein At3g49240 OS=Arabidopsis thaliana GN=EMB1796 PE=2 SV=1	POPTR_0012s02240g	ident	3.3	71.923	13.18	2	2	2
Cellular Component	GO:0005737	6	cytoplasm	1.58753e-182	A0A2K2A680	50S ribosomal protein L4, chloroplastic OS=Arabidopsis thaliana GN=RPL4 PE=2 SV=2	POPTR_006G221100v3	ident	3.6	30.94	5.6278	1	1	1
Cellular Component	GO:0005737	6	cytoplasm	1.58753e-182	B9IH97	Proteasome subunit alpha type	POPTR_0016s01710g	ident	20.8	27.417	45.931	5	4	1
Cellular Component	GO:0005737	6	cytoplasm	1.58753e-182	A9PB01	30S ribosomal protein S9	POPTR_0014s03900g	ident	13.8	22.829	22.769	4	2	1
Cellular Component	GO:0005737	6	cytoplasm	1.58753e-182	B9IQ63	Probable methionine--tRNA ligase OS=Oryza sativa subsp. japonica GN=Os06g0508700 PE=2 SV=2	POPTR_0019s08680g	ident	4.2	46.882	11.878	2	2	2
Cellular Component	GO:0005737	6	cytoplasm	1.58753e-182	B9HEU5	Pentatricopeptide repeat-containing family protein	POPTR_0007s12560g	ident	4.8	44.716	13.301	2	2	1
Cellular Component	GO:0005737	6	cytoplasm	1.58753e-182	B9GZ19	Glycyl-tRNA synthetase family protein	POPTR_0003s16070g	ident	13.6	77.173	17.895	1	8	1
Cellular Component	GO:0005737	6	cytoplasm	1.58753e-182	B9IK63	Mitochondrial processing peptidase beta subunit family protein	POPTR_0017s12800g	ident	25.6	58.604	38.02	5	10	5
Cellular Component	GO:0005737	6	cytoplasm	1.58753e-182	B9HD54	Pentatricopeptide repeat-containing protein At4g16390, chloroplastic OS=Arabidopsis thaliana GN=P67 PE=1 SV=3	POPTR_0006s01990g	ident	4.3	78.594	12.577	2	3	2
Cellular Component	GO:0005737	6	cytoplasm	1.58753e-182	A0A2K2BKH7	60S acidic ribosomal protein P1 OS=Zea mays GN=RPP1A PE=1 SV=1	POPTR_002G179400v3	ident	34.6	11.218	62.9	2	1	1
Cellular Component	GO:0005737	6	cytoplasm	1.58753e-182	B9GL50	Dynamin-like family protein	POPTR_0001s10710g	ident	18	68.244	70.424	10	9	9
Cellular Component	GO:0005737	6	cytoplasm	1.58753e-182	B9GVF4	Elongation factor G, mitochondrial	POPTR_0003s10930g	ident	3.7	73.435	12.399	1	2	1
Cellular Component	GO:0005737	6	cytoplasm	1.58753e-182	U5GAZ4	40S ribosomal protein S3a	POPTR_0005s05280g	ident	6.9	29.705	16.023	2	2	2
Cellular Component	GO:0005737	6	cytoplasm	1.58753e-182	B9IHJ0	26S proteasome subunit 7 family protein	POPTR_0016s02790g	ident	26.5	46.491	85.434	13	9	8
Cellular Component	GO:0005737	6	cytoplasm	1.58753e-182	B9IP24	Calcium-dependent protein kinase 1	POPTR_0019s00630g	ident	2.4	56.603	7.4278	1	1	1
Cellular Component	GO:0005737	6	cytoplasm	1.58753e-182	B9IJ24	Syntaxin 73 family protein	POPTR_0016s08960g	ident	13.2	29.711	17.674	3	3	3
Cellular Component	GO:0005737	6	cytoplasm	1.58753e-182	B9I2H8	AP complex subunit sigma	POPTR_0012s04800g	ident	17.4	18.646	15.004	2	2	2
Cellular Component	GO:0005737	6	cytoplasm	1.58753e-182	A0A2K2CB74	3-deoxy-manno-octulosonate cytidylyltransferase, mitochondrial OS=Arabidopsis thaliana GN=KDSB PE=1 SV=1	POPTR_001G400900v3	ident	10.3	29.186	7.7418	1	1	1
Cellular Component	GO:0005737	6	cytoplasm	1.58753e-182	A0A2K1XKK7	60S ribosomal protein L17-1 OS=Arabidopsis thaliana GN=RPL17A PE=2 SV=1	POPTR_015G094400v3	ident	24.5	16.057	14.047	2	3	1
Cellular Component	GO:0005737	6	cytoplasm	1.58753e-182	B9HZE4	Pyrophosphate--fructose 6-phosphate 1-phosphotransferase subunit beta	PFP-BETA	ident	19.3	61.212	19.766	3	9	3
Cellular Component	GO:0005737	6	cytoplasm	1.58753e-182	A0A2K2BUM7	30S ribosomal protein S6 alpha, chloroplastic OS=Arabidopsis thaliana GN=RPS6 PE=2 SV=1	POPTR_001G088300v3	ident	9.4	23.174	12.446	4	2	2
Cellular Component	GO:0005737	6	cytoplasm	1.58753e-182	B9H508	Prostaglandin E synthase 2 OS=Danio rerio GN=ptges2 PE=2 SV=1	POPTR_0005s26400g	ident	12.8	36.083	16.986	3	3	3
Cellular Component	GO:0005737	6	cytoplasm	1.58753e-182	B9HKV7	Glutamyl-tRNA(Gln) amidotransferase subunit B, chloroplastic/mitochondrial	GATB	ident	11.5	59.901	39.571	5	5	5
Cellular Component	GO:0005737	6	cytoplasm	1.58753e-182	U5FVI3	Cytochrome c OS=Vigna radiata var. radiata PE=1 SV=1	POPTR_0013s10300g	ident	13.1	19.555	13.986	2	2	2
Cellular Component	GO:0005737	6	cytoplasm	1.58753e-182	B9I172	2-oxoacid dehydrogenase family protein	POPTR_0011s09160g	ident	9	50.721	25.043	4	4	4
Cellular Component	GO:0005737	6	cytoplasm	1.58753e-182	B9ID38	Probable methyltransferase PMT16 OS=Arabidopsis thaliana GN=At2g45750 PE=3 SV=1	POPTR_0015s13580g	ident	4.6	71.979	11.803	2	2	2
Cellular Component	GO:0005737	6	cytoplasm	1.58753e-182	B9IBD9	26S proteasome regulatory subunit 4 homolog A OS=Arabidopsis thaliana GN=RPT2A PE=1 SV=1	POPTR_0014s18530g	ident	24.3	47.006	72.159	11	8	2
Cellular Component	GO:0005737	6	cytoplasm	1.58753e-182	A0A2K2A7Y7	Cytochrome b-c1 complex subunit 7	POPTR_006G250000v3	ident	27	14.706	22.932	3	3	2
Cellular Component	GO:0005737	6	cytoplasm	1.58753e-182	B9N5I6	Phenylalanyl-tRNA synthetase beta chain family protein	POPTR_0018s06640g	ident	11.9	67.528	13.016	2	6	2
Cellular Component	GO:0005737	6	cytoplasm	1.58753e-182	U5FG99	6,7-dimethyl-8-ribityllumazine synthase	POPTR_0017s00360g	ident	20.4	23.629	36.737	6	4	4
Cellular Component	GO:0005737	6	cytoplasm	1.58753e-182	B9GJ66	Mitochondrial import inner membrane translocase subunit Tim13 family protein	POPTR_0001s45640g	ident	50.6	9.6928	15.489	2	3	2
Cellular Component	GO:0005737	6	cytoplasm	1.58753e-182	A9PCS2	Eukaryotic translation initiation factor 3 subunit F	POPTR_0010s19940g	ident	17.1	31.535	26.775	4	4	4
Cellular Component	GO:0005737	6	cytoplasm	1.58753e-182	A9P9L2	60S ribosomal protein L35a	POPTR_0010s20140g	ident	33.9	12.811	7.5472	1	3	1
Cellular Component	GO:0005737	6	cytoplasm	1.58753e-182	B9GJU3	Naphthoate synthase family protein	POPTR_0001s33750g	ident	4.4	37.492	6.5125	1	1	1
Cellular Component	GO:0005737	6	cytoplasm	1.58753e-182	B9GM35	Pyruvate kinase	POPTR_0001s02820g	ident	4.3	61.876	7.104	1	1	1
Cellular Component	GO:0005737	6	cytoplasm	1.58753e-182	B9IQI1	Thioredoxin family protein	POPTR_0019s11190g	ident	12.7	49.604	18.638	4	4	3
Cellular Component	GO:0005737	6	cytoplasm	1.58753e-182	B9IG43	Acetyl co-enzyme A carboxylase carboxyltransferase alpha subunit family protein	POPTR_0016s11790g	ident	13.7	84.332	57.772	6	7	4
Cellular Component	GO:0005737	6	cytoplasm	1.58753e-182	B9HKS8	50S ribosomal protein L28, chloroplastic OS=Arabidopsis thaliana GN=RPL28 PE=2 SV=2	POPTR_0008s16970g	ident	8.7	11.807	6.2839	1	1	1
Cellular Component	GO:0005737	6	cytoplasm	1.58753e-182	A9PD23	40S ribosomal protein S20	POPTR_0015s14510g	ident	42.3	13.682	40.39	9	6	6
Cellular Component	GO:0005737	6	cytoplasm	1.58753e-182	B9N843	Biotin carboxylase 2, chloroplastic	POPTR_0018s14250g	ident	25.7	57.496	14.293	2	9	2
Cellular Component	GO:0005737	6	cytoplasm	1.58753e-182	B9HM05	Peptidase M1 family protein	POPTR_0008s04570g	ident	21.2	70.504	88.692	13	10	10
Cellular Component	GO:0005737	6	cytoplasm	1.58753e-182	A4GYQ8	30S ribosomal protein S14, chloroplastic	rps14	ident	21	11.683	13.496	2	2	2
Cellular Component	GO:0005737	6	cytoplasm	1.58753e-182	A0A2K1WZ20	Leucine aminopeptidase 2, chloroplastic OS=Arabidopsis thaliana GN=LAP2 PE=2 SV=2	POPTR_018G106800v3	ident	29.5	57.202	227.63	23	12	8
Cellular Component	GO:0005737	6	cytoplasm	1.58753e-182	U7DZW0	Thioredoxin M1, chloroplastic OS=Oryza sativa subsp. japonica GN=Os02g0639900 PE=2 SV=1	POPTR_0104s00220g	ident	23.3	11.469	13.039	2	2	2
Cellular Component	GO:0005737	6	cytoplasm	1.58753e-182	B9H657	Phosphoserine aminotransferase	POPTR_0005s10290g	ident	17.6	47.176	48.808	9	7	7
Cellular Component	GO:0005737	6	cytoplasm	1.58753e-182	B9HKC4	Pyruvate kinase	POPTR_0008s15950g	ident	13.5	64.965	64.574	7	7	7
Cellular Component	GO:0005737	6	cytoplasm	1.58753e-182	B9HPM4	Glutamate--tRNA ligase, chloroplastic/mitochondrial OS=Arabidopsis thaliana GN=OVA3 PE=1 SV=1	POPTR_0009s17070g	ident	9.1	64.284	29.263	5	4	4
Cellular Component	GO:0005737	6	cytoplasm	1.58753e-182	B9GZT5	Phosphoribulokinase	POPTR_0003s09830g	ident	29.1	44.978	122.42	13	9	5
Cellular Component	GO:0005737	6	cytoplasm	1.58753e-182	B9I3N8	Aspartyl aminopeptidase family protein	POPTR_0012s09710g	ident	8.8	53.6	13.336	2	4	2
Cellular Component	GO:0005737	6	cytoplasm	1.58753e-182	B9HIF7	Ubiquinone biosynthesis protein COQ4 homolog, mitochondrial	POPTR_0008s09670g	ident	8.3	25.9	9.7224	1	1	1
Cellular Component	GO:0005737	6	cytoplasm	1.58753e-182	U5GX63	Ribosome maturation factor RimM OS=Synechococcus sp. (strain WH7803) GN=rimM PE=3 SV=1	POPTR_0001s34380g	ident	2.1	75.409	5.7615	1	1	1
Cellular Component	GO:0005737	6	cytoplasm	1.58753e-182	A0A2K2B220	Coatomer subunit beta'	POPTR_003G056300v3	ident	12.7	97.307	88.027	11	10	1
Cellular Component	GO:0005737	6	cytoplasm	1.58753e-182	B9N0F9	tRNA synthetase class I family protein	POPTR_0004s23530g	ident	15.5	123.08	138.66	18	14	14
Cellular Component	GO:0005737	6	cytoplasm	1.58753e-182	B9HV17	Putative delta-7-sterol reductase family protein	POPTR_0010s25970g	ident	3	49.851	6.878	1	1	1
Cellular Component	GO:0005737	6	cytoplasm	1.58753e-182	A9PH17	Triosephosphate isomerase, chloroplastic OS=Fragaria ananassa GN=TPI PE=2 SV=1	POPTR_0004s17530g	ident	23.3	33.502	66.708	10	6	3
Cellular Component	GO:0005737	6	cytoplasm	1.58753e-182	B9H9J8	Glucan endo-1,3-beta-glucosidase, basic isoform OS=Prunus persica GN=GNS1 PE=3 SV=1	POPTR_0006s04670g	ident	17.7	37.463	22.546	3	4	3
Cellular Component	GO:0005737	6	cytoplasm	1.58753e-182	B9N4Q4	Calreticulin family protein	POPTR_0005s01850g	ident	10.2	43.82	15.591	1	3	1
Cellular Component	GO:0005737	6	cytoplasm	1.58753e-182	U5GUL6	Protein LHCP TRANSLOCATION DEFECT OS=Arabidopsis thaliana GN=LTD PE=1 SV=1	POPTR_0001s44690g	ident	8.8	18.834	22.922	2	1	1
Cellular Component	GO:0005737	6	cytoplasm	1.58753e-182	A0A2K1XMB4	Enolase OS=Oryza sativa subsp. japonica GN=ENO1 PE=1 SV=2	POPTR_015G131100v3	ident	28.5	47.593	75.09	16	7	5
Cellular Component	GO:0005737	6	cytoplasm	1.58753e-182	A9PDI7	Thioredoxin	POPTR_0005s25420g	ident	48.2	12.576	52.611	6	4	4
Cellular Component	GO:0005737	6	cytoplasm	1.58753e-182	B9HZQ1	Ribokinase	POPTR_0011s11460g	ident	11.4	39.862	27.604	4	4	4
Cellular Component	GO:0005737	6	cytoplasm	1.58753e-182	A9P9I1	Proteasome subunit alpha type	POPTR_0016s14640g	ident	38.2	27.23	7.2599	0	8	1
Cellular Component	GO:0005737	6	cytoplasm	1.58753e-182	B9HNK4	Cysteine desulfurase family protein	POPTR_0009s07040g	ident	15.1	51.661	51.682	6	5	5
Cellular Component	GO:0005737	6	cytoplasm	1.58753e-182	B9ILZ0	(DL)-glycerol-3-phosphatase 2 OS=Arabidopsis thaliana GN=GPP2 PE=1 SV=1	POPTR_0018s10020g	ident	12	26.506	13.514	2	2	2
Cellular Component	GO:0005737	6	cytoplasm	1.58753e-182	B9MUZ2	T-complex polypeptide 1 family protein	POPTR_0014s05750g	ident	21.1	59.275	77.942	11	10	10
Cellular Component	GO:0005737	6	cytoplasm	1.58753e-182	U5GIT3	Ribosomal protein S7	POPTR_0004s14780g	ident	16.7	23.76	70.516	5	4	4
Cellular Component	GO:0005737	6	cytoplasm	1.58753e-182	B9HE21	Malic enzyme	POPTR_0006s25280g	ident	6	63.095	13.172	2	3	2
Cellular Component	GO:0005737	6	cytoplasm	1.58753e-182	B9GMU5	Transaldolase family protein	POPTR_0001s12930g	ident	18.4	47.792	11.885	1	7	1
Cellular Component	GO:0005737	6	cytoplasm	1.58753e-182	B9GKB5	Calcium-dependent protein kinase 1	POPTR_0001s10070g	ident	9.7	58.24	7.5144	1	4	1
Cellular Component	GO:0005737	6	cytoplasm	1.58753e-182	B9IHQ6	Pentatricopeptide repeat-containing protein At1g80270, mitochondrial OS=Arabidopsis thaliana GN=At1g80270 PE=2 SV=1	POPTR_0016s03540g	ident	2.1	69.813	5.9331	1	1	1
Cellular Component	GO:0005737	6	cytoplasm	1.58753e-182	B9HQP3	Nodulin-26 family protein	POPTR_0009s01070g	ident	9.4	26.682	15.861	3	2	2
Cellular Component	GO:0005737	6	cytoplasm	1.58753e-182	U5GXF2	PROTON PUMP INTERACTOR 1 family protein	POPTR_0001s41010g	ident	6.1	68.781	19.973	3	4	3
Cellular Component	GO:0005737	6	cytoplasm	1.58753e-182	B9HPM8	Aminoacylase family protein	POPTR_0009s17030g	ident	17	50.096	49.108	8	7	7
Cellular Component	GO:0005737	6	cytoplasm	1.58753e-182	B9HUB0	Enoyl-CoA hydratase/isomerase family protein	POPTR_0010s08450g	ident	10.9	26.059	19.649	2	2	2
Cellular Component	GO:0005737	6	cytoplasm	1.58753e-182	A9PHY8	Glutathione-disulfide reductase family protein	POPTR_0003s17670g	ident	25.1	53.804	93.185	10	10	6
Cellular Component	GO:0005737	6	cytoplasm	1.58753e-182	B9HBJ6	Cell division protein FtsZ homolog 2-2, chloroplastic OS=Arabidopsis thaliana GN=FTSZ2-2 PE=1 SV=1	POPTR_0006s08310g	ident	16.3	50.473	18.535	2	5	2
Cellular Component	GO:0005737	6	cytoplasm	1.58753e-182	A9PFA8	60S ribosomal protein L5 OS=Cucumis sativus GN=RPL5 PE=2 SV=1	POPTR_0019s13040g	ident	18.5	33.846	48.468	11	5	1
Cellular Component	GO:0005737	6	cytoplasm	1.58753e-182	U5FNF7	V-type proton ATPase subunit C	POPTR_0017s08810g	ident	26.1	42.62	52.226	9	8	3
Cellular Component	GO:0005737	6	cytoplasm	1.58753e-182	A0A2K1YQ12	Eukaryotic translation initiation factor isoform 4E-2 OS=Triticum aestivum PE=1 SV=1	POPTR_010G066700v3	ident	11.8	23.124	7.3465	1	2	1
Cellular Component	GO:0005737	6	cytoplasm	1.58753e-182	B9NAI3	Translationally controlled tumor-like family protein	POPTR_0008s22310g	ident	27.4	19.103	5.979	1	3	1
Cellular Component	GO:0005737	6	cytoplasm	1.58753e-182	B9N6A1	Zinc finger family protein	POPTR_0006s29020g	ident	6.4	46.521	12.603	2	2	2
Cellular Component	GO:0005737	6	cytoplasm	1.58753e-182	B9GTA0	Transport family protein	POPTR_0002s18820g	ident	3	95.046	15.052	2	2	2
Cellular Component	GO:0005737	6	cytoplasm	1.58753e-182	B9IG72	PLASTID-SPECIFIC RIBOSOMAL protein 4	POPTR_0016s12110g	ident	8	12.283	7.9109	1	1	1
Cellular Component	GO:0005737	6	cytoplasm	1.58753e-182	A0A2K1YLX6	50S ribosomal protein L18, chloroplastic OS=Arabidopsis thaliana GN=RPL18 PE=2 SV=1	POPTR_010G005000v3	ident	41	13.404	30.057	3	3	3
Cellular Component	GO:0005737	6	cytoplasm	1.58753e-182	B9H1B4	Calcium-dependent protein kinase 21 OS=Arabidopsis thaliana GN=CPK21 PE=1 SV=1	POPTR_0004s01530g	ident	7.5	60.083	7.0726	1	3	1
Cellular Component	GO:0005737	6	cytoplasm	1.58753e-182	U5G556	Delta-1-pyrroline-5-carboxylate synthase	POPTR_0008s06060g	ident	6.5	74.846	6.8389	1	4	1
Cellular Component	GO:0005737	6	cytoplasm	1.58753e-182	A0A2K1YQ57	60S ribosomal protein L14-2 OS=Arabidopsis thaliana GN=RPL14B PE=1 SV=1	POPTR_010G069900v3	ident	23	14.183	12.108	3	4	1
Cellular Component	GO:0005737	6	cytoplasm	1.58753e-182	B9GX32	Reticulon-like protein	POPTR_0003s13340g	ident	15.6	28.211	26.221	5	4	3
Cellular Component	GO:0005737	6	cytoplasm	1.58753e-182	A9PBJ2	Dolichyl-diphosphooligosaccharide--protein glycosyltransferase subunit 1	POPTR_0002s00790g	ident	13	68.964	27.192	3	8	2
Cellular Component	GO:0005737	6	cytoplasm	1.58753e-182	A9PEC2	GTP-binding family protein	POPTR_0003s07970g	ident	40.9	22.692	55.581	7	5	4
Cellular Component	GO:0005737	6	cytoplasm	1.58753e-182	A9P8N3	NADH2 dehydrogenase family protein	POPTR_0015s06500g	ident	20.6	12.591	6.3971	2	2	1
Cellular Component	GO:0005737	6	cytoplasm	1.58753e-182	A0A2K2BXS2	Regulator of nonsense transcripts 1 homolog OS=Arabidopsis thaliana GN=UPF1 PE=1 SV=2	POPTR_001G148100v3	ident	8.2	97.354	28.89	5	4	4
Cellular Component	GO:0005737	6	cytoplasm	1.58753e-182	A0A2K1XLC8	Calnexin homolog 1 OS=Arabidopsis thaliana GN=CNX1 PE=1 SV=1	POPTR_015G109200v3	ident	22	55.084	63.678	13	9	4
Cellular Component	GO:0005737	6	cytoplasm	1.58753e-182	B9I8T9	Exonuclease RRP41 family protein	POPTR_0014s09000g	ident	3.7	26.567	6.1902	0	1	1
Cellular Component	GO:0005737	6	cytoplasm	1.58753e-182	U5FHW1	Glutamyl-tRNA(Gln) amidotransferase subunit A, chloroplastic/mitochondrial	GATA	ident	2.4	57.765	8.0883	1	1	1
Cellular Component	GO:0005737	6	cytoplasm	1.58753e-182	B9H416	T-complex protein 1 subunit gamma	POPTR_0004s14120g	ident	21.4	60.464	86.389	14	13	2
Cellular Component	GO:0005737	6	cytoplasm	1.58753e-182	A4GYU6	30S ribosomal protein S8, chloroplastic	rps8	ident	26.1	15.502	38.93	5	4	4
Cellular Component	GO:0005737	6	cytoplasm	1.58753e-182	B9IKU0	Cytochrome b-c1 complex subunit 7	POPTR_0018s01370g	ident	22.9	14.175	29.413	2	2	1
Cellular Component	GO:0005737	6	cytoplasm	1.58753e-182	A0A2K2C1M8	40S ribosomal protein S14 OS=Zea mays PE=3 SV=1	POPTR_001G218700v3	ident	36.2	13.728	98.867	9	4	4
Cellular Component	GO:0005737	6	cytoplasm	1.58753e-182	B9IE99	Transducin family protein	POPTR_0015s04290g	ident	2.6	66.079	6.1356	1	1	1
Cellular Component	GO:0005737	6	cytoplasm	1.58753e-182	A0A2K1Y2A1	50S ribosomal protein L3, chloroplastic (Fragment) OS=Nicotiana tabacum GN=RPL3 PE=2 SV=1	POPTR_013G070100v3	ident	10	30.464	27.435	5	3	3
Cellular Component	GO:0005737	6	cytoplasm	1.58753e-182	B9H5B7	Eukaryotic translation initiation factor 3 subunit C	POPTR_0005s26650g	ident	4.8	101.7	5.7325	1	4	1
Cellular Component	GO:0005737	6	cytoplasm	1.58753e-182	B9IAU9	Indole-3-glycerol phosphate synthase, chloroplastic OS=Arabidopsis thaliana GN=IGPS PE=1 SV=2	POPTR_0014s16700g	ident	8.8	42.787	24.674	4	4	4
Cellular Component	GO:0005737	6	cytoplasm	1.58753e-182	A4GYP9	DNA-directed RNA polymerase subunit beta'	rpoC1	ident	6.4	78.979	31.99	4	4	4
Cellular Component	GO:0005737	6	cytoplasm	1.58753e-182	A9PC72	Uncharacterized protein	POPTR_0004s12260g	ident	18.7	15.258	13.018	3	2	2
Cellular Component	GO:0005737	6	cytoplasm	1.58753e-182	B9I9H1	Uncharacterized protein	POPTR_0014s11390g	ident	3.9	39.67	5.8683	1	1	1
Cellular Component	GO:0005737	6	cytoplasm	1.58753e-182	B9GEJ5	Acetyltransferase-related family protein	POPTR_0001s17830g	ident	6.2	101.89	13.887	3	4	2
Cellular Component	GO:0005737	6	cytoplasm	1.58753e-182	B9HGF4	Probable prefoldin subunit 5 OS=Arabidopsis thaliana GN=At5g23290 PE=2 SV=1	POPTR_0007s07470g	ident	14.6	17.159	5.6625	1	2	1
Cellular Component	GO:0005737	6	cytoplasm	1.58753e-182	B9I8Q0	Exocyst complex component Sec10-related family protein	POPTR_0014s08590g	ident	3.8	91.347	37.728	1	3	3
Cellular Component	GO:0005737	6	cytoplasm	1.58753e-182	B9IHX4	Eukaryotic translation initiation factor 3 subunit E	POPTR_0016s04310g	ident	26.1	51.194	39.219	5	10	4
Cellular Component	GO:0005737	6	cytoplasm	1.58753e-182	B9GLK8	Autophagy-related protein 3	POPTR_0001s00860g	ident	5.7	35.508	12.068	1	1	1
Cellular Component	GO:0005737	6	cytoplasm	1.58753e-182	A4GYU9	30S ribosomal protein S3, chloroplastic	rps3	ident	41.3	25.252	83.681	12	9	9
Cellular Component	GO:0005737	6	cytoplasm	1.58753e-182	B9HS17	Thioredoxin M-type 3 family protein	POPTR_0009s10370g	ident	8.8	19.015	9.241	1	1	1
Cellular Component	GO:0005737	6	cytoplasm	1.58753e-182	B9IKU8	Acyl-protein thioesterase 2 OS=Homo sapiens GN=LYPLA2 PE=1 SV=1	POPTR_0018s01470g	ident	4.3	27.612	9.0837	1	1	1
Cellular Component	GO:0005737	6	cytoplasm	1.58753e-182	A9PFZ9	Proline--tRNA ligase, cytoplasmic OS=Arabidopsis thaliana GN=At3g62120 PE=1 SV=1	POPTR_0014s10800g	ident	22.9	56.865	76.345	13	9	9
Cellular Component	GO:0005737	6	cytoplasm	1.58753e-182	A9PGZ3	Chlorophyll a-b binding protein, chloroplastic	POPTR_0019s09140g	ident	29.3	30.924	53.113	9	6	6
Cellular Component	GO:0005737	6	cytoplasm	1.58753e-182	A9P8D7	60S ribosomal protein L27	POPTR_0001s35630g	ident	14.1	15.642	13.138	2	2	1
Cellular Component	GO:0005737	6	cytoplasm	1.58753e-182	B9IF22	Cys endopeptidase family protein	POPTR_0015s09890g	ident	4.1	40.461	8.9865	2	1	1
Cellular Component	GO:0005737	6	cytoplasm	1.58753e-182	B9H2M6	ATP synthase mitochondrial F1 complex assembly factor 1 OS=Homo sapiens GN=ATPAF1 PE=1 SV=1	POPTR_0004s05150g	ident	4.5	28.04	5.7389	1	1	1
Cellular Component	GO:0005737	6	cytoplasm	1.58753e-182	B9N332	Mitochondrial import inner membrane translocase subunit Tim17 family protein	POPTR_0006s17850g	ident	4.1	22.836	5.9569	1	1	1
Cellular Component	GO:0005737	6	cytoplasm	1.58753e-182	B9HBB4	Adhesion regulating molecule family protein	POPTR_0006s07840g	ident	7.3	35.039	15.562	2	2	2
Cellular Component	GO:0005737	6	cytoplasm	1.58753e-182	A0A2K2B4H1	Dolichyl-diphosphooligosaccharide--protein glycosyltransferase subunit DAD1	POPTR_003G096800v3	ident	10.9	10.158	11.003	1	1	1
Cellular Component	GO:0005737	6	cytoplasm	1.58753e-182	B9GR92	26S protease regulatory complex subunit 4 family protein	POPTR_0002s25390g	ident	23.3	49.694	15.806	5	8	2
Cellular Component	GO:0005737	6	cytoplasm	1.58753e-182	A9PHC5	S-adenosylmethionine synthase 4	METK4	ident	27.4	42.569	33.25	5	8	3
Cellular Component	GO:0005737	6	cytoplasm	1.58753e-182	B9GZ18	Cytochrome b-c1 complex subunit Rieske, mitochondrial	POPTR_0003s16060g	ident	7.4	29.729	15.611	1	1	1
Cellular Component	GO:0005737	6	cytoplasm	1.58753e-182	U5GQV8	60S ribosomal protein L18-2 OS=Arabidopsis thaliana GN=RPL18B PE=1 SV=2	POPTR_0002s20400g	ident	28.8	20.543	7.4025	2	5	1
Cellular Component	GO:0005737	6	cytoplasm	1.58753e-182	A0A2K1X2L6	Isoleucine--tRNA ligase, cytoplasmic OS=Arabidopsis thaliana GN=At4g10320 PE=2 SV=1	POPTR_017G033200v3	ident	11.1	112.31	75.355	12	11	4
Cellular Component	GO:0005737	6	cytoplasm	1.58753e-182	B9I5X1	Eukaryotic translation initiation factor NCBP OS=Arabidopsis thaliana GN=NCBP PE=2 SV=1	POPTR_0013s05360g	ident	12.4	26.184	14.169	2	2	2
Cellular Component	GO:0005737	6	cytoplasm	1.58753e-182	B9GVR2	Elongation factor G, chloroplastic	POPTR_0003s11300g	ident	18.4	86.022	98.342	22	13	12
Cellular Component	GO:0005737	6	cytoplasm	1.58753e-182	B9I465	30S ribosomal protein S9 OS=Bartonella tribocorum (strain CIP 105476 / IBS 506) GN=rpsI PE=3 SV=1	POPTR_0012s12870g	ident	2.7	46.113	5.7027	1	1	1
Cellular Component	GO:0005737	6	cytoplasm	1.58753e-182	B9HPG0	60S acidic ribosomal protein P3	POPTR_0009s03780g	ident	6.9	11.777	6.125	1	1	1
Cellular Component	GO:0005737	6	cytoplasm	1.58753e-182	B9GJN0	Triosephosphate isomerase, cytosolic OS=Arabidopsis thaliana GN=CTIMC PE=1 SV=2	POPTR_0001s24710g	ident	45.5	27.489	96.867	10	10	8
Cellular Component	GO:0005737	6	cytoplasm	1.58753e-182	A9PCM5	Proteasome subunit alpha type	POPTR_0006s01040g	ident	20.8	27.4	9.6463	3	4	1
Cellular Component	GO:0005737	6	cytoplasm	1.58753e-182	B9GU26	Protein disulfide-isomerase	POPTR_0002s08260g	ident	33.1	56.187	150.29	27	14	14
Cellular Component	GO:0005737	6	cytoplasm	1.58753e-182	B9N4Y8	Uncharacterized protein	POPTR_0004s14770g	ident	2.4	58.368	6.2108	0	1	1
Cellular Component	GO:0005737	6	cytoplasm	1.58753e-182	B9IKK0	26S protease regulatory subunit 7 OS=Spinacia oleracea GN=RPT1 PE=2 SV=1	POPTR_0018s04900g	ident	31.9	47.96	101.47	14	11	2
Cellular Component	GO:0005737	6	cytoplasm	1.58753e-182	B9IIS7	Phox domain-containing family protein	POPTR_0016s07720g	ident	15.3	45.332	37.049	6	6	6
Cellular Component	GO:0005737	6	cytoplasm	1.58753e-182	A0A2K1XS87	Acetyl-coenzyme A carboxylase carboxyl transferase subunit alpha, chloroplastic OS=Arabidopsis thaliana GN=CAC3 PE=1 SV=1	POPTR_014G081000v3	ident	14.4	81.013	62.718	9	7	6
Cellular Component	GO:0005737	6	cytoplasm	1.58753e-182	B9IKK9	ER membrane protein complex subunit 1 OS=Gallus gallus GN=EMC1 PE=2 SV=1	POPTR_0018s00550g	ident	11.4	109.99	69.542	9	9	9
Cellular Component	GO:0005737	6	cytoplasm	1.58753e-182	B9GRL4	Glucose-1-phosphate adenylyltransferase	POPTR_0002s03480g	ident	15.2	58.209	62.425	8	6	5
Cellular Component	GO:0005737	6	cytoplasm	1.58753e-182	B9IK45	Chaperone protein ClpB3, chloroplastic OS=Arabidopsis thaliana GN=CLPB3 PE=1 SV=1	POPTR_0017s12630g	ident	28.2	106.7	316.72	28	22	20
Cellular Component	GO:0005737	6	cytoplasm	1.58753e-182	A9P8I6	60S ribosomal protein L30 OS=Euphorbia esula GN=RPL30 PE=3 SV=1	POPTR_0007s06050g	ident	52.7	12.343	6.6426	1	5	1
Cellular Component	GO:0005737	6	cytoplasm	1.58753e-182	A0A2K1Z6Q8	V-type proton ATPase subunit a	POPTR_009G121400v3	ident	5.9	93.052	38.483	4	4	4
Cellular Component	GO:0005737	6	cytoplasm	1.58753e-182	U5FT95	60S ribosomal protein L5 OS=Cucumis sativus GN=RPL5 PE=2 SV=1	POPTR_0013s13220g	ident	13.7	33.482	-2	1	4	0
Cellular Component	GO:0005737	6	cytoplasm	1.58753e-182	A9PGA3	Vesicle-associated membrane protein 727	POPTR_0010s24630g	ident	3.8	26.979	5.889	1	1	1
Cellular Component	GO:0005737	6	cytoplasm	1.58753e-182	B9H603	Serine--tRNA ligase OS=Helianthus annuus PE=2 SV=1	POPTR_0005s09720g	ident	16.8	51.599	75.199	10	9	9
Cellular Component	GO:0005737	6	cytoplasm	1.58753e-182	U5GW43	Cytochrome c oxidase subunit 5b-2, mitochondrial OS=Arabidopsis thaliana GN=COX5B-2 PE=2 SV=1	POPTR_0001s17370g	ident	9.1	18.397	15.291	2	2	2
Cellular Component	GO:0005737	6	cytoplasm	1.58753e-182	A9PAK1	tRNA synthetase class 1 family protein	POPTR_0009s16090g	ident	6.4	45.777	15.374	2	2	2
Cellular Component	GO:0005737	6	cytoplasm	1.58753e-182	B9HCI9	Acetyl co-enzyme A carboxylase carboxyltransferase alpha subunit family protein	POPTR_0006s09700g	ident	6.2	83.584	5.6417	1	4	1
Cellular Component	GO:0005737	6	cytoplasm	1.58753e-182	A0A2K1Z8W7	Cell division protein FtsZ homolog 2-1, chloroplastic OS=Arabidopsis thaliana GN=FTSZ2-1 PE=1 SV=2	POPTR_009G164100v3	ident	16.4	46.372	12.698	1	5	0
Cellular Component	GO:0005737	6	cytoplasm	1.58753e-182	A9PGF6	Ras-related protein RABB1c OS=Arabidopsis thaliana GN=RABB1C PE=1 SV=1	POPTR_0006s00360g	ident	43.1	23.148	66.784	9	8	4
Cellular Component	GO:0005737	6	cytoplasm	1.58753e-182	B9GQN7	Peptidylprolyl isomerase	POPTR_0002s24970g	ident	13	64.077	87.453	9	6	6
Cellular Component	GO:0005737	6	cytoplasm	1.58753e-182	B9GVD4	Acetyltransferase component of pyruvate dehydrogenase complex	POPTR_0003s04140g	ident	5.7	55.387	45.476	3	2	2
Cellular Component	GO:0005737	6	cytoplasm	1.58753e-182	B9GN56	Phosphoenolpyruvate carboxykinase family protein	POPTR_0002s10850g	ident	26	73.925	117.39	21	13	11
Cellular Component	GO:0005737	6	cytoplasm	1.58753e-182	A9PA91	Glucosamine/galactosamine-6-phosphate isomerase family protein	POPTR_0015s00970g	ident	7.4	28.348	8.6471	1	2	1
Cellular Component	GO:0005737	6	cytoplasm	1.58753e-182	B9IDD4	Mitochondrial import inner membrane translocase subunit Tim17/Tim22/Tim23 family protein	POPTR_0015s00290g	ident	15.4	27.807	24.343	4	3	2
Cellular Component	GO:0005737	6	cytoplasm	1.58753e-182	A9PD04	Porin family protein	POPTR_0008s19940g	ident	27.2	29.608	51.567	6	5	4
Cellular Component	GO:0005737	6	cytoplasm	1.58753e-182	U5FSA3	Thioredoxin family protein	POPTR_0013s11580g	ident	11.5	48.134	26.427	4	4	3
Cellular Component	GO:0005737	6	cytoplasm	1.58753e-182	B9HUH4	GCN5-related N-acetyltransferase family protein	POPTR_0010s23170g	ident	26.7	26.215	59.455	6	5	3
Cellular Component	GO:0005737	6	cytoplasm	1.58753e-182	U5FQ33	Iron-sulfur cluster assembly protein 1 OS=Arabidopsis thaliana GN=ISU1 PE=2 SV=1	POPTR_0015s08860g	ident	6.5	15.626	7.0373	2	1	1
Cellular Component	GO:0005737	6	cytoplasm	1.58753e-182	B9H915	Translation initiation factor IF-1, chloroplastic OS=Glycine max GN=infA PE=2 SV=1	POPTR_0006s25780g	ident	10.9	16.1	12.849	2	2	2
Cellular Component	GO:0005737	6	cytoplasm	1.58753e-182	B9H5C6	Plastocyanin	POPTR_0005s26740g	ident	25	17.02	43.745	4	2	2
Cellular Component	GO:0005737	6	cytoplasm	1.58753e-182	B9HS40	Cysteine proteinase RD21A OS=Arabidopsis thaliana GN=RD21A PE=1 SV=1	POPTR_0009s10090g	ident	6.3	52.385	66.792	6	4	4
Cellular Component	GO:0005737	6	cytoplasm	1.58753e-182	A0A2K2A0P4	Enolase OS=Ricinus communis PE=2 SV=1	POPTR_006G116800v3	ident	33.7	43.95	92.715	26	10	8
Cellular Component	GO:0005737	6	cytoplasm	1.58753e-182	U5GHH1	AP-4 complex subunit epsilon	POPTR_0004s24340g	ident	8.2	107.17	48.059	7	7	7
Cellular Component	GO:0005737	6	cytoplasm	1.58753e-182	A0A2K2ATD3	40S ribosomal protein S19-3 OS=Arabidopsis thaliana GN=RPS19C PE=2 SV=1	POPTR_004G118800v3	ident	51.7	13.446	96.375	18	7	5
Cellular Component	GO:0005737	6	cytoplasm	1.58753e-182	A4GYP4	ATP synthase subunit b, chloroplastic	atpF	ident	22.3	20.828	81.128	3	3	3
Cellular Component	GO:0005737	6	cytoplasm	1.58753e-182	B9HHU6	Eukaryotic translation initiation factor 2 subunit alpha homolog OS=Arabidopsis thaliana GN=At2g40290 PE=1 SV=2	POPTR_0008s07250g	ident	15.2	38.539	9.1675	1	5	1
Cellular Component	GO:0005737	6	cytoplasm	1.58753e-182	B9H3E8	Uncharacterized protein	POPTR_0004s08060g	ident	6.8	23.522	7.5867	1	1	1
Cellular Component	GO:0005737	6	cytoplasm	1.58753e-182	U5GGW6	Casein kinase 1 OS=Oryza sativa subsp. japonica GN=CKI1 PE=1 SV=1	POPTR_0005s248602g	ident	11.1	27.813	14.958	3	2	1
Cellular Component	GO:0005737	6	cytoplasm	1.58753e-182	A9PBR8	60S ribosomal protein L27	POPTR_0016s02040g	ident	14.1	15.674	-2	2	2	1
Cellular Component	GO:0005737	6	cytoplasm	1.58753e-182	B9HRF5	Complex 1 family protein	POPTR_0009s12750g	ident	20.7	13.615	18.085	3	2	2
Cellular Component	GO:0005737	6	cytoplasm	1.58753e-182	A0A2K1XWU6	Threonine--tRNA ligase, chloroplastic/mitochondrial 2 OS=Arabidopsis thaliana GN=EMB2761 PE=2 SV=1	POPTR_014G162200v3	ident	3.5	57.042	7.2527	1	1	1
Cellular Component	GO:0005737	6	cytoplasm	1.58753e-182	A0A2K1Z1B1	Elongation factor 1-beta 1 OS=Arabidopsis thaliana GN=At5g12110 PE=2 SV=2	POPTR_009G018600v3	ident	25.5	23.937	73.273	18	5	5
Cellular Component	GO:0005737	6	cytoplasm	1.58753e-182	A0A2K1XZ64	40S ribosomal protein S4	POPTR_013G011000v3	ident	40.4	27.458	53.968	11	9	3
Cellular Component	GO:0005737	6	cytoplasm	1.58753e-182	B9I117	Ribosomal protein L32	POPTR_0011s02900g	ident	25.6	15.662	27.47	8	3	1
Cellular Component	GO:0005737	6	cytoplasm	1.58753e-182	B9HHE4	Isocitrate lyase	POPTR_0007s02500g	ident	27.4	64.68	213.7	25	13	7
Cellular Component	GO:0005737	6	cytoplasm	1.58753e-182	A9P894	60S acidic ribosomal protein P2 OS=Parthenium argentatum PE=3 SV=1	POPTR_004G185800v3	ident	79.8	11.415	191.77	14	7	3
Cellular Component	GO:0005737	6	cytoplasm	1.58753e-182	A0A2K1ZY67	Galacturonokinase OS=Arabidopsis thaliana GN=GALAK PE=1 SV=1	POPTR_006G070500v3	ident	9.8	44.629	24.365	4	4	4
Cellular Component	GO:0005737	6	cytoplasm	1.58753e-182	A0A2K1Z763	Translocon-associated protein subunit alpha OS=Arabidopsis thaliana GN=At2g21160 PE=2 SV=3	POPTR_009G129800v3	ident	6.5	22.038	9.8242	1	1	1
Cellular Component	GO:0005737	6	cytoplasm	1.58753e-182	B9H671	Uncharacterized protein	POPTR_0005s10430g	ident	8.8	20.693	5.7211	1	1	1
Cellular Component	GO:0005737	6	cytoplasm	1.58753e-182	U5GG57	5-methyltetrahydropteroyltriglutamate--homocysteine methyltransferase OS=Catharanthus roseus GN=METE PE=2 SV=1	POPTR_0004s20220g	ident	33.3	90.422	296.37	36	21	9
Cellular Component	GO:0005737	6	cytoplasm	1.58753e-182	A0A2K2BAY8	Lysine--tRNA ligase, chloroplastic/mitochondrial OS=Arabidopsis thaliana GN=OVA5 PE=2 SV=1	POPTR_003G221600v3	ident	2	62.452	6.3086	1	1	1
Cellular Component	GO:0005737	6	cytoplasm	1.58753e-182	U5FGW8	UTP--glucose-1-phosphate uridylyltransferase	POPTR_0017s01390g	ident	33.3	51.605	9.2335	2	11	1
Cellular Component	GO:0005737	6	cytoplasm	1.58753e-182	B9I9A8	Protein translocase subunit SecA	POPTR_0014s10790g	ident	12.3	108.68	76.897	12	9	9
Cellular Component	GO:0005737	6	cytoplasm	1.58753e-182	A0A2K2APU8	Eukaryotic translation initiation factor 3 subunit D	POPTR_004G044500v3	ident	10.8	62.955	31.279	7	5	5
Cellular Component	GO:0005737	6	cytoplasm	1.58753e-182	B9GJZ9	Obg-like ATPase 1	POPTR_0001s46210g	ident	18.5	46.475	48.144	6	5	5
Cellular Component	GO:0005737	6	cytoplasm	1.58753e-182	A0A2K1XV07	Peptide chain release factor APG3, chloroplastic OS=Arabidopsis thaliana GN=APG3 PE=2 SV=1	POPTR_014G133400v3	ident	6.5	25.925	6.4993	1	1	1
Cellular Component	GO:0005737	6	cytoplasm	1.58753e-182	A9P9M3	60S ribosomal protein L6	POPTR_0009s07020g	ident	8.6	25.887	22.061	3	2	2
Cellular Component	GO:0005737	6	cytoplasm	1.58753e-182	B9IQE8	Uncharacterized protein	POPTR_0019s10790g	ident	5.4	16.071	6.0059	1	1	1
Cellular Component	GO:0005747	14	mitochondrial respiratory chain complex I	0.00031916	B9H3E2	NADH dehydrogenase [ubiquinone] iron-sulfur protein 1, mitochondrial OS=Solanum tuberosum PE=2 SV=1	POPTR_0004s08110g	ident	19.8	79.963	87.934	15	12	6
Cellular Component	GO:0005747	14	mitochondrial respiratory chain complex I	0.00031916	A9PB99	NADH-ubiquinone oxidoreductase 19 kDa subunit family protein	POPTR_0008s20110g	ident	15.9	12.031	12.291	2	2	2
Cellular Component	GO:0005747	14	mitochondrial respiratory chain complex I	0.00031916	U5FES1	NADH dehydrogenase [ubiquinone] 1 alpha subcomplex subunit 12	POPTR_0019s07820g	ident	22.9	21.025	28.272	4	3	3
Cellular Component	GO:0005747	14	mitochondrial respiratory chain complex I	0.00031916	B9GS73	NADH-ubiquinone oxidoreductase 24 kDa subunit family protein	POPTR_0002s04610g	ident	17.3	28.277	31.964	7	5	5
Cellular Component	GO:0005747	14	mitochondrial respiratory chain complex I	0.00031916	A9P8N3	NADH2 dehydrogenase family protein	POPTR_0015s06500g	ident	20.6	12.591	6.3971	2	2	1
Cellular Component	GO:0005747	14	mitochondrial respiratory chain complex I	0.00031916	A9PC01	NADH2 dehydrogenase family protein	POPTR_0012s05350g	ident	29	12.613	29.023	6	3	2
Cellular Component	GO:0005747	14	mitochondrial respiratory chain complex I	0.00031916	B9HRF5	Complex 1 family protein	POPTR_0009s12750g	ident	20.7	13.615	18.085	3	2	2
Cellular Component	GO:0043228	3	non-membrane-bounded organelle	5.1742e-15	A9PBI3	Ribosomal protein L7Ae/L30e/S12e/Gadd45	POPTR_0013s12110g	ident	17.2	13.9	11.635	1	1	1
Cellular Component	GO:0043228	3	non-membrane-bounded organelle	5.1742e-15	A9PC09	Nucleolar RNA-binding Nop10p family protein	POPTR_0002s03780g	ident	23.4	7.4765	6.6722	1	1	1
Cellular Component	GO:0043228	3	non-membrane-bounded organelle	5.1742e-15	A9PCW9	60S ribosomal protein L17-1	POPTR_0012s09860g	ident	16	20.406	6.8295	2	2	1
Cellular Component	GO:0043228	3	non-membrane-bounded organelle	5.1742e-15	B9GQP4	60S ribosomal protein L32-1 OS=Arabidopsis thaliana GN=RPL32A PE=2 SV=2	POPTR_0002s25050g	ident	30.8	15.586	8.8741	3	3	1
Cellular Component	GO:0043228	3	non-membrane-bounded organelle	5.1742e-15	A0A2K1YZS2	DNA gyrase subunit A, chloroplastic/mitochondrial OS=Nicotiana benthamiana GN=GYRA PE=2 SV=1	POPTR_010G247000v3	ident	6	97.958	31.981	4	4	4
Cellular Component	GO:0043228	3	non-membrane-bounded organelle	5.1742e-15	B9ILZ3	Histone H4	POPTR_0018s10050g	ident	32.6	10.209	5.891	1	3	1
Cellular Component	GO:0043228	3	non-membrane-bounded organelle	5.1742e-15	A0A2K2BTN7	60S ribosomal protein L21-1 OS=Arabidopsis thaliana GN=RPL21A PE=2 SV=2	POPTR_001G071100v3	ident	13.8	15.017	6.6041	1	2	1
Cellular Component	GO:0043228	3	non-membrane-bounded organelle	5.1742e-15	B9GPZ0	DEAD/DEAH box helicase family protein	POPTR_0002s15890g	ident	13.2	57.242	52.623	5	5	5
Cellular Component	GO:0043228	3	non-membrane-bounded organelle	5.1742e-15	B9IIV1	60S ribosomal protein L23a OS=Daucus carota GN=RPL23A PE=2 SV=1	POPTR_0016s08070g	ident	21.9	17.267	40.872	7	6	6
Cellular Component	GO:0043228	3	non-membrane-bounded organelle	5.1742e-15	B9H7W2	40S ribosomal protein S18	POPTR_0005s21860g	ident	27.6	17.581	12.255	1	4	1
Cellular Component	GO:0043228	3	non-membrane-bounded organelle	5.1742e-15	A9P8E8	40S ribosomal protein S18 OS=Arabidopsis thaliana GN=RPS18A PE=1 SV=1	POPTR_0002s05220g	ident	40.8	17.635	10.147	1	6	1
Cellular Component	GO:0043228	3	non-membrane-bounded organelle	5.1742e-15	B9HJ33	50S ribosomal protein L15, chloroplastic (Fragment) OS=Pisum sativum GN=RPL15 PE=2 SV=1	POPTR_0008s12000g	ident	23.6	27.204	52.726	8	6	6
Cellular Component	GO:0043228	3	non-membrane-bounded organelle	5.1742e-15	B9IPR1	Tubulin alpha chain	POPTR_0019s05160g	ident	22	49.594	-2	1	8	0
Cellular Component	GO:0043228	3	non-membrane-bounded organelle	5.1742e-15	B9I1A1	30S ribosomal protein S10	POPTR_0011s09530g	ident	4.9	22.722	6.142	1	1	1
Cellular Component	GO:0043228	3	non-membrane-bounded organelle	5.1742e-15	A0A2K2AXF7	Ribosomal protein	POPTR_004G202800v3	ident	27.7	18.789	45.866	11	5	2
Cellular Component	GO:0043228	3	non-membrane-bounded organelle	5.1742e-15	A9PDL5	60S ribosomal protein L38 OS=Arabidopsis thaliana GN=RPL38A PE=3 SV=1	POPTR_0007s01660g	ident	53.6	8.0244	39.685	6	4	1
Cellular Component	GO:0043228	3	non-membrane-bounded organelle	5.1742e-15	A9P8K6	40S ribosomal protein S11	POPTR_0014s05220g	ident	14.5	17.917	10.771	2	2	1
Cellular Component	GO:0043228	3	non-membrane-bounded organelle	5.1742e-15	A9PI77	Ribosomal protein	POPTR_0007s11960g	ident	21.3	24.385	17.749	5	5	2
Cellular Component	GO:0043228	3	non-membrane-bounded organelle	5.1742e-15	B9HSR0	60S acidic ribosomal protein P0	POPTR_0010s19860g	ident	21.9	34.096	44.171	8	5	5
Cellular Component	GO:0043228	3	non-membrane-bounded organelle	5.1742e-15	A9PBS4	Ribosomal protein L19	POPTR_0001s15230g	ident	4.1	27.025	6.6816	2	1	1
Cellular Component	GO:0043228	3	non-membrane-bounded organelle	5.1742e-15	B9III1	50S ribosomal protein L22 OS=Sinorhizobium medicae (strain WSM419) GN=rplV PE=3 SV=1	POPTR_0016s06740g	ident	3.6	31.171	6.0571	1	1	1
Cellular Component	GO:0043228	3	non-membrane-bounded organelle	5.1742e-15	A4GYT5	30S ribosomal protein S12-A, chloroplastic	rps12-A	ident	17.1	13.639	12.843	2	2	2
Cellular Component	GO:0043228	3	non-membrane-bounded organelle	5.1742e-15	B9MUD1	60S ribosomal protein L13	POPTR_0001s01350g	ident	27.1	23.812	133.05	8	5	2
Cellular Component	GO:0043228	3	non-membrane-bounded organelle	5.1742e-15	A4GYU8	50S ribosomal protein L16, chloroplastic	rpl16	ident	42.2	15.413	36.466	7	4	2
Cellular Component	GO:0043228	3	non-membrane-bounded organelle	5.1742e-15	B9GJV7	Fimbrin-1 OS=Arabidopsis thaliana GN=FIM1 PE=1 SV=2	POPTR_0001s37110g	ident	1.7	76.915	7.1838	1	1	1
Cellular Component	GO:0043228	3	non-membrane-bounded organelle	5.1742e-15	A0A2K1YXW6	60S ribosomal protein L35 OS=Euphorbia esula GN=RPL35 PE=2 SV=1	POPTR_010G212300v3	ident	9.7	11.87	12.316	2	2	1
Cellular Component	GO:0043228	3	non-membrane-bounded organelle	5.1742e-15	A9PC19	40S ribosomal protein S15a OS=Daucus carota GN=RPS15A PE=2 SV=3	POPTR_0008s05190g	ident	44.6	14.854	38.398	5	5	5
Cellular Component	GO:0043228	3	non-membrane-bounded organelle	5.1742e-15	A9P978	60S ribosomal protein L38	POPTR_0010s18850g	ident	53.6	8.0765	6.7098	1	4	1
Cellular Component	GO:0043228	3	non-membrane-bounded organelle	5.1742e-15	A0A2K1XL83	60S ribosomal protein L34 OS=Nicotiana tabacum GN=RPL34 PE=2 SV=1	POPTR_015G106500v3	ident	24.5	11.801	12.888	3	2	2
Cellular Component	GO:0043228	3	non-membrane-bounded organelle	5.1742e-15	B9H7A3	30S ribosomal protein S13, chloroplastic OS=Arabidopsis thaliana GN=RPS13 PE=2 SV=1	POPTR_0005s16160g	ident	23.8	18.745	39.201	8	5	5
Cellular Component	GO:0043228	3	non-membrane-bounded organelle	5.1742e-15	U5G8Z4	DNA topoisomerase 1 OS=Rickettsia felis (strain ATCC VR-1525 / URRWXCal2) GN=topA PE=3 SV=1	POPTR_0006s29400g	ident	4.6	124.25	30.917	6	5	5
Cellular Component	GO:0043228	3	non-membrane-bounded organelle	5.1742e-15	A0A2K1ZIR2	60S ribosomal protein L23 OS=Arabidopsis thaliana GN=RPL23A PE=2 SV=3	POPTR_008G171200v3	ident	49.6	13.424	81.631	10	5	5
Cellular Component	GO:0043228	3	non-membrane-bounded organelle	5.1742e-15	A0A2K2BZR0	Ribosomal protein L37	POPTR_001G183200v3	ident	12.2	9.5681	7.9058	1	1	1
Cellular Component	GO:0043228	3	non-membrane-bounded organelle	5.1742e-15	A0A2K2BH83	Tubulin alpha chain	POPTR_002G111900v3	ident	42.3	45.771	16.056	1	13	1
Cellular Component	GO:0043228	3	non-membrane-bounded organelle	5.1742e-15	B9GK36	Oleosin 18.5 kDa family protein	POPTR_0001s11760g	ident	10.4	14.084	61.416	5	1	1
Cellular Component	GO:0043228	3	non-membrane-bounded organelle	5.1742e-15	B9GGV7	UBP1-associated protein 2C OS=Arabidopsis thaliana GN=UBA2C PE=2 SV=1	POPTR_0001s38640g	ident	10.9	39.549	40.407	4	4	4
Cellular Component	GO:0043228	3	non-membrane-bounded organelle	5.1742e-15	B9IGG6	40S ribosomal protein S4	POPTR_0016s13210g	ident	37.6	29.719	136.95	17	9	3
Cellular Component	GO:0043228	3	non-membrane-bounded organelle	5.1742e-15	B9GWH0	Actin-depolymerizing factor family protein	POPTR_0003s12550g	ident	5	15.96	5.6537	2	1	1
Cellular Component	GO:0043228	3	non-membrane-bounded organelle	5.1742e-15	U5FR48	Flap endonuclease 1	FEN1	ident	3.4	46.335	8.671	1	1	1
Cellular Component	GO:0043228	3	non-membrane-bounded organelle	5.1742e-15	B9HD67	60S ribosomal protein L27	POPTR_0006s02230g	ident	8.1	15.699	7.0164	2	1	1
Cellular Component	GO:0043228	3	non-membrane-bounded organelle	5.1742e-15	A9PBL6	40S ribosomal protein S24	POPTR_0030s00470g	ident	26.9	15.398	56.916	6	4	2
Cellular Component	GO:0043228	3	non-membrane-bounded organelle	5.1742e-15	B9I7J5	Histone H2A	POPTR_0013s01890g	ident	11	15.349	11.584	2	2	1
Cellular Component	GO:0043228	3	non-membrane-bounded organelle	5.1742e-15	A9PCX2	60S ribosomal protein L21	POPTR_0003s15780g	ident	11	18.753	5.6473	1	2	0
Cellular Component	GO:0043228	3	non-membrane-bounded organelle	5.1742e-15	A9PBW0	60S ribosomal protein L12	POPTR_0018s14210g	ident	33.9	17.645	37.731	8	4	4
Cellular Component	GO:0043228	3	non-membrane-bounded organelle	5.1742e-15	B9IG32	Fructokinase-like 1, chloroplastic OS=Arabidopsis thaliana GN=FLN1 PE=1 SV=1	POPTR_0016s11690g	ident	5.6	54.826	20.984	2	2	2
Cellular Component	GO:0043228	3	non-membrane-bounded organelle	5.1742e-15	A9P9G9	60S ribosomal protein L28	POPTR_0001s19490g	ident	42.5	16.388	38.518	7	4	3
Cellular Component	GO:0043228	3	non-membrane-bounded organelle	5.1742e-15	A9P9A0	40S ribosomal protein S16	POPTR_0008s14940g	ident	57.6	16.402	60.008	17	9	2
Cellular Component	GO:0043228	3	non-membrane-bounded organelle	5.1742e-15	B9MU53	Cell cycle checkpoint protein RAD1 OS=Mus musculus GN=Rad1 PE=1 SV=1	POPTR_0001s02150g	ident	3.6	33.965	6.5261	1	1	1
Cellular Component	GO:0043228	3	non-membrane-bounded organelle	5.1742e-15	A0A2K2BIM1	60S ribosomal protein L37a OS=Gossypium hirsutum GN=RPL37A PE=3 SV=1	POPTR_002G140100v3	ident	25	7.1202	7.2194	1	1	1
Cellular Component	GO:0043228	3	non-membrane-bounded organelle	5.1742e-15	A9P8N4	Profilin	POPTR_0006s25180g	ident	24.4	13.972	20.452	4	2	2
Cellular Component	GO:0043228	3	non-membrane-bounded organelle	5.1742e-15	A9PC05	40S ribosomal protein S24	POPTR_0010s09820g	ident	26.9	15.332	14.763	3	4	1
Cellular Component	GO:0043228	3	non-membrane-bounded organelle	5.1742e-15	B9IBY8	40S ribosomal protein S13-2	POPTR_0014s06420g	ident	31.8	17.107	5.8011	1	4	1
Cellular Component	GO:0043228	3	non-membrane-bounded organelle	5.1742e-15	A4GYU7	50S ribosomal protein L14, chloroplastic	rpl14	ident	19.7	13.579	20.62	4	2	2
Cellular Component	GO:0043228	3	non-membrane-bounded organelle	5.1742e-15	A0A2K2A680	50S ribosomal protein L4, chloroplastic OS=Arabidopsis thaliana GN=RPL4 PE=2 SV=2	POPTR_006G221100v3	ident	3.6	30.94	5.6278	1	1	1
Cellular Component	GO:0043228	3	non-membrane-bounded organelle	5.1742e-15	A9PB01	30S ribosomal protein S9	POPTR_0014s03900g	ident	13.8	22.829	22.769	4	2	1
Cellular Component	GO:0043228	3	non-membrane-bounded organelle	5.1742e-15	A9PFG8	Actin-depolymerizing factor family protein	POPTR_0010s21560g	ident	8.6	16.047	9.1382	1	1	1
Cellular Component	GO:0043228	3	non-membrane-bounded organelle	5.1742e-15	B9HJD9	High-mobility-group family protein	POPTR_0008s13170g	ident	4.8	21.583	6.7983	1	1	1
Cellular Component	GO:0043228	3	non-membrane-bounded organelle	5.1742e-15	A0A2K1XLI8	40S ribosomal protein SA	POPTR_015G112900v3	ident	41.3	31.698	171.53	19	10	3
Cellular Component	GO:0043228	3	non-membrane-bounded organelle	5.1742e-15	A9PBF7	60S ribosomal protein L18a	POPTR_0011s06730g	ident	27.5	21.331	43.621	6	6	6
Cellular Component	GO:0043228	3	non-membrane-bounded organelle	5.1742e-15	A9PCZ0	40S ribosomal protein S15 OS=Oryza sativa subsp. japonica GN=RPS15 PE=2 SV=2	POPTR_0002s04420g	ident	24.3	17.225	19.895	2	2	2
Cellular Component	GO:0043228	3	non-membrane-bounded organelle	5.1742e-15	A0A2K2B2X9	40S ribosomal protein SA	POPTR_003G071200v3	ident	29.6	31.981	111.82	10	8	3
Cellular Component	GO:0043228	3	non-membrane-bounded organelle	5.1742e-15	A9P7T6	Tubulin alpha chain	POPTR_0001s04180g	ident	24.2	49.819	6.4145	1	8	1
Cellular Component	GO:0043228	3	non-membrane-bounded organelle	5.1742e-15	A0A2K2BKH7	60S acidic ribosomal protein P1 OS=Zea mays GN=RPP1A PE=1 SV=1	POPTR_002G179400v3	ident	34.6	11.218	62.9	2	1	1
Cellular Component	GO:0043228	3	non-membrane-bounded organelle	5.1742e-15	U5GAZ4	40S ribosomal protein S3a	POPTR_0005s05280g	ident	6.9	29.705	16.023	2	2	2
Cellular Component	GO:0043228	3	non-membrane-bounded organelle	5.1742e-15	A9PE87	Tubulin beta chain	POPTR_0001s25410g	ident	16.5	50.41	7.6361	2	7	0
Cellular Component	GO:0043228	3	non-membrane-bounded organelle	5.1742e-15	A9PA83	Histone H4	POPTR_0005s11740g	ident	33	11.409	37.629	10	5	3
Cellular Component	GO:0043228	3	non-membrane-bounded organelle	5.1742e-15	B9I3F7	50S ribosomal protein L19, chloroplastic OS=Spinacia oleracea GN=RPL19 PE=1 SV=2	POPTR_0012s08870g	ident	3.3	27.425	-2	1	1	1
Cellular Component	GO:0043228	3	non-membrane-bounded organelle	5.1742e-15	A0A2K1XKK7	60S ribosomal protein L17-1 OS=Arabidopsis thaliana GN=RPL17A PE=2 SV=1	POPTR_015G094400v3	ident	24.5	16.057	14.047	2	3	1
Cellular Component	GO:0043228	3	non-membrane-bounded organelle	5.1742e-15	A0A2K2BUM7	30S ribosomal protein S6 alpha, chloroplastic OS=Arabidopsis thaliana GN=RPS6 PE=2 SV=1	POPTR_001G088300v3	ident	9.4	23.174	12.446	4	2	2
Cellular Component	GO:0043228	3	non-membrane-bounded organelle	5.1742e-15	A9PHY3	Ribosome-binding factor PSRP1, chloroplastic OS=Spinacia oleracea GN=PSRP1 PE=1 SV=2	POPTR_0015s00430g	ident	3.3	34.338	6.7848	2	1	1
Cellular Component	GO:0043228	3	non-membrane-bounded organelle	5.1742e-15	A9P9U4	60S ribosomal protein L22-1	POPTR_0002s20540g	ident	38.4	14.037	9.6252	1	5	1
Cellular Component	GO:0043228	3	non-membrane-bounded organelle	5.1742e-15	A0A2K1X4Y3	Tubulin alpha chain	POPTR_017G081000v3	ident	37	49.681	273.63	21	13	1
Cellular Component	GO:0043228	3	non-membrane-bounded organelle	5.1742e-15	A0A2K2C2L9	Actin-depolymerizing factor 2 OS=Petunia hybrida GN=ADF2 PE=2 SV=1	POPTR_001G236400v3	ident	9.1	15.342	15.073	3	1	1
Cellular Component	GO:0043228	3	non-membrane-bounded organelle	5.1742e-15	A0A2K2AKR5	Structural maintenance of chromosomes protein	POPTR_005G224900v3	ident	2	140.64	11.917	2	2	2
Cellular Component	GO:0043228	3	non-membrane-bounded organelle	5.1742e-15	A9PB37	60S ribosomal protein L13a-2	POPTR_0001s32170g	ident	28.6	23.62	47.123	13	7	4
Cellular Component	GO:0043228	3	non-membrane-bounded organelle	5.1742e-15	B9HAL7	39S ribosomal protein L41-A, mitochondrial OS=Xenopus laevis GN=mrpl41-a PE=2 SV=1	POPTR_0006s07000g	ident	14.1	10.287	5.636	1	1	1
Cellular Component	GO:0043228	3	non-membrane-bounded organelle	5.1742e-15	B9GWG9	Tubulin beta chain	POPTR_0003s12540g	ident	16.6	50.091	15.134	1	7	0
Cellular Component	GO:0043228	3	non-membrane-bounded organelle	5.1742e-15	A9PCN3	GA family protein	POPTR_0011s15080g	ident	32.1	21.917	7.6534	1	8	1
Cellular Component	GO:0043228	3	non-membrane-bounded organelle	5.1742e-15	A9P9L2	60S ribosomal protein L35a	POPTR_0010s20140g	ident	33.9	12.811	7.5472	1	3	1
Cellular Component	GO:0043228	3	non-membrane-bounded organelle	5.1742e-15	A4GYU4	30S ribosomal protein S11, chloroplastic	rps11	ident	10.9	14.954	9.1746	2	1	1
Cellular Component	GO:0043228	3	non-membrane-bounded organelle	5.1742e-15	B9HKS8	50S ribosomal protein L28, chloroplastic OS=Arabidopsis thaliana GN=RPL28 PE=2 SV=2	POPTR_0008s16970g	ident	8.7	11.807	6.2839	1	1	1
Cellular Component	GO:0043228	3	non-membrane-bounded organelle	5.1742e-15	U5G4E1	40S ribosomal protein S9-2 OS=Arabidopsis thaliana GN=RPS9C PE=1 SV=1	POPTR_0007s09750g	ident	35	22.962	18.04	2	9	1
Cellular Component	GO:0043228	3	non-membrane-bounded organelle	5.1742e-15	U5FZ59	Cell differentiation protein RCD1 homolog OS=Pongo abelii GN=RQCD1 PE=2 SV=2	POPTR_0011s08710g	ident	7	14.393	6.1031	1	1	1
Cellular Component	GO:0043228	3	non-membrane-bounded organelle	5.1742e-15	A9PD23	40S ribosomal protein S20	POPTR_0015s14510g	ident	42.3	13.682	40.39	9	6	6
Cellular Component	GO:0043228	3	non-membrane-bounded organelle	5.1742e-15	A4GYQ8	30S ribosomal protein S14, chloroplastic	rps14	ident	21	11.683	13.496	2	2	2
Cellular Component	GO:0043228	3	non-membrane-bounded organelle	5.1742e-15	B9IIC4	60S ribosomal protein L21-2 OS=Arabidopsis thaliana GN=RPL21E PE=2 SV=1	POPTR_0016s06110g	ident	25.6	18.753	25.649	2	2	1
Cellular Component	GO:0043228	3	non-membrane-bounded organelle	5.1742e-15	B9GJJ8	60S ribosomal protein L9 OS=Oryza sativa subsp. japonica GN=RPL9 PE=2 SV=3	POPTR_0001s45820g	ident	30.1	21.934	195.23	12	8	1
Cellular Component	GO:0043228	3	non-membrane-bounded organelle	5.1742e-15	U5FRN5	40S ribosomal protein S5-2 OS=Arabidopsis thaliana GN=RPS5B PE=1 SV=2	POPTR_0013s05290g	ident	11.7	16.179	11.277	2	2	2
Cellular Component	GO:0043228	3	non-membrane-bounded organelle	5.1742e-15	U5GX63	Ribosome maturation factor RimM OS=Synechococcus sp. (strain WH7803) GN=rimM PE=3 SV=1	POPTR_0001s34380g	ident	2.1	75.409	5.7615	1	1	1
Cellular Component	GO:0043228	3	non-membrane-bounded organelle	5.1742e-15	U5GXN9	Ribosomal protein S14 mitochondrial (Fragment)	POPTR_0001s44850g	ident	7.4	18.877	7.4455	1	1	1
Cellular Component	GO:0043228	3	non-membrane-bounded organelle	5.1742e-15	A0A2K2C7C7	50S ribosomal protein L27, chloroplastic OS=Arabidopsis thaliana GN=RPL27 PE=2 SV=1	POPTR_001G329500v3	ident	20	14.868	20.577	3	3	3
Cellular Component	GO:0043228	3	non-membrane-bounded organelle	5.1742e-15	B9GT02	40S ribosomal protein S12	POPTR_0002s05710g	ident	44.1	15.325	45.978	6	5	3
Cellular Component	GO:0043228	3	non-membrane-bounded organelle	5.1742e-15	A0A2K1Z561	40S ribosomal protein S29 OS=Triticum aestivum GN=RPS29 PE=1 SV=1	POPTR_009G090000v3	ident	37.5	6.4304	13.574	3	2	2
Cellular Component	GO:0043228	3	non-membrane-bounded organelle	5.1742e-15	B9H9F7	Dyskerin family protein	POPTR_0006s04270g	ident	2.5	66.57	7.4866	1	1	1
Cellular Component	GO:0043228	3	non-membrane-bounded organelle	5.1742e-15	A0A2K2BAT9	Tubulin alpha chain	POPTR_003G220300v3	ident	28.3	46.197	12.876	2	9	0
Cellular Component	GO:0043228	3	non-membrane-bounded organelle	5.1742e-15	A9P806	Ribosomal protein 1	POPTR_0005s21640g	ident	24.9	44.38	93.754	14	11	2
Cellular Component	GO:0043228	3	non-membrane-bounded organelle	5.1742e-15	B9I857	Probable nucleolar protein 5-2 OS=Arabidopsis thaliana GN=NOP5-2 PE=1 SV=1	POPTR_0013s03260g	ident	1.8	61.735	9.8639	1	1	1
Cellular Component	GO:0043228	3	non-membrane-bounded organelle	5.1742e-15	U5G798	60S ribosomal protein L4-1 OS=Arabidopsis thaliana GN=RPL4A PE=1 SV=1	POPTR_0006s13470g	ident	26.7	41.553	20.248	3	10	3
Cellular Component	GO:0043228	3	non-membrane-bounded organelle	5.1742e-15	A0A2K2A437	60S ribosomal protein L11 OS=Medicago sativa GN=RPL11 PE=2 SV=1	POPTR_006G181500v3	ident	31.2	19.572	39.856	8	5	5
Cellular Component	GO:0043228	3	non-membrane-bounded organelle	5.1742e-15	A0A2K2AK20	40S ribosomal protein S18 OS=Arabidopsis thaliana GN=RPS18A PE=1 SV=1	POPTR_005G211200v3	ident	42.2	17.172	90.906	17	6	1
Cellular Component	GO:0043228	3	non-membrane-bounded organelle	5.1742e-15	A0A2K1XM94	40S ribosomal protein S13 OS=Glycine max GN=RPS13 PE=2 SV=1	POPTR_015G130000v3	ident	34.3	16.004	6.1825	1	4	1
Cellular Component	GO:0043228	3	non-membrane-bounded organelle	5.1742e-15	A4GYX3	30S ribosomal protein S15, chloroplastic	rps15	ident	43.3	10.663	34.437	5	5	5
Cellular Component	GO:0043228	3	non-membrane-bounded organelle	5.1742e-15	A0A2K1XB61	40S ribosomal protein S2-3 OS=Arabidopsis thaliana GN=RPS2C PE=1 SV=2	POPTR_016G055000v3	ident	28	29.147	140.95	14	7	7
Cellular Component	GO:0043228	3	non-membrane-bounded organelle	5.1742e-15	B9GP17	30S ribosomal protein S9	POPTR_0002s13330g	ident	13.7	22.985	9.4764	2	2	1
Cellular Component	GO:0043228	3	non-membrane-bounded organelle	5.1742e-15	A0A2K1YKM0	50S ribosomal protein L11, chloroplastic OS=Arabidopsis thaliana GN=RPL11 PE=2 SV=1	POPTR_011G150700v3	ident	22.4	23.148	6.379	2	4	1
Cellular Component	GO:0043228	3	non-membrane-bounded organelle	5.1742e-15	B9HNJ3	Tubulin beta chain	POPTR_0009s07150g	ident	16.6	50.057	115.8	11	7	0
Cellular Component	GO:0043228	3	non-membrane-bounded organelle	5.1742e-15	A0A2K2BZT7	30S ribosomal protein S17, chloroplastic OS=Arabidopsis thaliana GN=RPS17 PE=1 SV=1	POPTR_001G184000v3	ident	6.2	17.715	7.0152	1	1	1
Cellular Component	GO:0043228	3	non-membrane-bounded organelle	5.1742e-15	B9GQG6	Tubulin gamma chain	POPTR_0002s16930g	ident	2	49.768	6.2997	1	1	1
Cellular Component	GO:0043228	3	non-membrane-bounded organelle	5.1742e-15	A0A2K1Z3E5	Ribosomal protein	POPTR_009G057100v3	ident	33.1	34.173	65.165	20	9	2
Cellular Component	GO:0043228	3	non-membrane-bounded organelle	5.1742e-15	A9P931	60S ribosomal protein L27a-3 OS=Arabidopsis thaliana GN=RPL27AC PE=2 SV=2	POPTR_0008s19110g	ident	32.2	16.501	33.148	5	4	1
Cellular Component	GO:0043228	3	non-membrane-bounded organelle	5.1742e-15	A9P7V0	Eukaryotic translation initiation factor 6	EIF6	ident	14.3	26.423	26.481	3	3	3
Cellular Component	GO:0043228	3	non-membrane-bounded organelle	5.1742e-15	U5GIT3	Ribosomal protein S7	POPTR_0004s14780g	ident	16.7	23.76	70.516	5	4	4
Cellular Component	GO:0043228	3	non-membrane-bounded organelle	5.1742e-15	A9PCT0	Ribosomal protein L2	POPTR_0005s11780g	ident	21.5	28.198	35.409	9	4	4
Cellular Component	GO:0043228	3	non-membrane-bounded organelle	5.1742e-15	A9PGV4	GLUCOSE HYPERSENSITIVE 1 family protein	POPTR_0001s33910g	ident	7.4	20.288	6.8657	1	1	1
Cellular Component	GO:0043228	3	non-membrane-bounded organelle	5.1742e-15	A4GYT2	50S ribosomal protein L33, chloroplastic	rpl33	ident	15.2	7.8032	7.0916	1	1	1
Cellular Component	GO:0043228	3	non-membrane-bounded organelle	5.1742e-15	U5FM21	40S ribosomal protein S8	POPTR_0017s14180g	ident	25.1	24.922	49.523	8	4	4
Cellular Component	GO:0043228	3	non-membrane-bounded organelle	5.1742e-15	B9HK59	60S ribosomal protein L7-2	POPTR_0008s00840g	ident	28.8	28.267	15.315	2	8	2
Cellular Component	GO:0043228	3	non-membrane-bounded organelle	5.1742e-15	U5FXQ5	Uncharacterized protein	POPTR_0013s11310g	ident	5.3	21.149	7.1676	1	1	1
Cellular Component	GO:0043228	3	non-membrane-bounded organelle	5.1742e-15	A4GYP7	30S ribosomal protein S2, chloroplastic	rps2	ident	29.2	26.928	44.751	9	6	6
Cellular Component	GO:0043228	3	non-membrane-bounded organelle	5.1742e-15	A9PGL4	40S ribosomal protein S19	POPTR_0017s12780g	ident	38.5	15.864	32.463	5	5	4
Cellular Component	GO:0043228	3	non-membrane-bounded organelle	5.1742e-15	B9GH00	Tubulin beta chain	POPTR_0001s46870g	ident	16.6	50.056	7.1634	1	7	0
Cellular Component	GO:0043228	3	non-membrane-bounded organelle	5.1742e-15	A9PFA8	60S ribosomal protein L5 OS=Cucumis sativus GN=RPL5 PE=2 SV=1	POPTR_0019s13040g	ident	18.5	33.846	48.468	11	5	1
Cellular Component	GO:0043228	3	non-membrane-bounded organelle	5.1742e-15	B9IJM3	Oleosin family protein	POPTR_0017s10810g	ident	8.1	15.856	13.432	5	2	2
Cellular Component	GO:0043228	3	non-membrane-bounded organelle	5.1742e-15	B9N6A1	Zinc finger family protein	POPTR_0006s29020g	ident	6.4	46.521	12.603	2	2	2
Cellular Component	GO:0043228	3	non-membrane-bounded organelle	5.1742e-15	B9IG72	PLASTID-SPECIFIC RIBOSOMAL protein 4	POPTR_0016s12110g	ident	8	12.283	7.9109	1	1	1
Cellular Component	GO:0043228	3	non-membrane-bounded organelle	5.1742e-15	A0A2K1YCF4	40S ribosomal protein SA	POPTR_012G117600v3	ident	38.1	31.07	46.881	3	9	3
Cellular Component	GO:0043228	3	non-membrane-bounded organelle	5.1742e-15	A0A2K1YLX6	50S ribosomal protein L18, chloroplastic OS=Arabidopsis thaliana GN=RPL18 PE=2 SV=1	POPTR_010G005000v3	ident	41	13.404	30.057	3	3	3
Cellular Component	GO:0043228	3	non-membrane-bounded organelle	5.1742e-15	B9IFW5	40S ribosomal protein S7	POPTR_0016s10560g	ident	32.5	22.034	17.869	2	6	2
Cellular Component	GO:0043228	3	non-membrane-bounded organelle	5.1742e-15	A0A2K2A3P0	Uncharacterized protein	POPTR_006G170500v3	ident	4.6	24.418	7.1484	1	1	1
Cellular Component	GO:0043228	3	non-membrane-bounded organelle	5.1742e-15	A0A2K1YQ57	60S ribosomal protein L14-2 OS=Arabidopsis thaliana GN=RPL14B PE=1 SV=1	POPTR_010G069900v3	ident	23	14.183	12.108	3	4	1
Cellular Component	GO:0043228	3	non-membrane-bounded organelle	5.1742e-15	A9PAL5	40S ribosomal protein S9-2 OS=Arabidopsis thaliana GN=RPS9C PE=1 SV=1	POPTR_0006s22630g	ident	35	22.998	124.86	14	10	2
Cellular Component	GO:0043228	3	non-membrane-bounded organelle	5.1742e-15	A0A2K2BNS4	60S ribosomal protein L13a-3 OS=Arabidopsis thaliana GN=RPL13AC PE=2 SV=1	POPTR_002G242600v3	ident	19.4	23.63	10.988	2	4	2
Cellular Component	GO:0043228	3	non-membrane-bounded organelle	5.1742e-15	B9I8T9	Exonuclease RRP41 family protein	POPTR_0014s09000g	ident	3.7	26.567	6.1902	0	1	1
Cellular Component	GO:0043228	3	non-membrane-bounded organelle	5.1742e-15	A0A2K1ZC54	Actin-depolymerizing factor 1 OS=Petunia hybrida GN=ADF1 PE=2 SV=1	POPTR_008G052100v3	ident	9.1	15.468	7.0447	1	1	1
Cellular Component	GO:0043228	3	non-membrane-bounded organelle	5.1742e-15	A4GYU6	30S ribosomal protein S8, chloroplastic	rps8	ident	26.1	15.502	38.93	5	4	4
Cellular Component	GO:0043228	3	non-membrane-bounded organelle	5.1742e-15	A9PC56	40S ribosomal protein S11	POPTR_0002s14130g	ident	25.2	17.863	36.36	6	4	3
Cellular Component	GO:0043228	3	non-membrane-bounded organelle	5.1742e-15	A9PGG5	60S ribosomal protein L10	POPTR_0013s15560g	ident	21.4	24.893	36.099	7	4	4
Cellular Component	GO:0043228	3	non-membrane-bounded organelle	5.1742e-15	B9IJJ7	Ribosomal protein L13	POPTR_0017s10450g	ident	9.3	23.616	12.523	2	2	2
Cellular Component	GO:0043228	3	non-membrane-bounded organelle	5.1742e-15	A9PEI9	60S ribosomal protein L7-2	POPTR_0010s25740g	ident	38.5	28.405	152.8	12	9	1
Cellular Component	GO:0043228	3	non-membrane-bounded organelle	5.1742e-15	A0A2K2BD75	Myosin-9 OS=Arabidopsis thaliana GN=XI-C PE=2 SV=1	POPTR_002G041800v3	ident	0.8	114.28	5.6456	2	1	1
Cellular Component	GO:0043228	3	non-membrane-bounded organelle	5.1742e-15	A0A2K2C1M8	40S ribosomal protein S14 OS=Zea mays PE=3 SV=1	POPTR_001G218700v3	ident	36.2	13.728	98.867	9	4	4
Cellular Component	GO:0043228	3	non-membrane-bounded organelle	5.1742e-15	A9PB80	Ribosomal protein 1	POPTR_0002s06680g	ident	22.4	44.532	5.9103	1	10	1
Cellular Component	GO:0043228	3	non-membrane-bounded organelle	5.1742e-15	B9IE99	Transducin family protein	POPTR_0015s04290g	ident	2.6	66.079	6.1356	1	1	1
Cellular Component	GO:0043228	3	non-membrane-bounded organelle	5.1742e-15	A0A2K1Y2A1	50S ribosomal protein L3, chloroplastic (Fragment) OS=Nicotiana tabacum GN=RPL3 PE=2 SV=1	POPTR_013G070100v3	ident	10	30.464	27.435	5	3	3
Cellular Component	GO:0043228	3	non-membrane-bounded organelle	5.1742e-15	B9HU05	50S ribosomal protein L10, chloroplastic OS=Nicotiana tabacum GN=RPL10 PE=2 SV=1	POPTR_0010s22290g	ident	15	25.478	52.756	4	3	3
Cellular Component	GO:0043228	3	non-membrane-bounded organelle	5.1742e-15	B9H4Y2	Tubulin beta chain	POPTR_0005s26140g	ident	17.8	50.276	14.508	2	7	0
Cellular Component	GO:0043228	3	non-membrane-bounded organelle	5.1742e-15	A4GYR2	30S ribosomal protein S4, chloroplastic	rps4	ident	20.9	23.497	28.73	5	5	5
Cellular Component	GO:0043228	3	non-membrane-bounded organelle	5.1742e-15	A9PEJ6	40S ribosomal protein S17	POPTR_0008s01820g	ident	22.9	16.061	40.756	13	6	6
Cellular Component	GO:0043228	3	non-membrane-bounded organelle	5.1742e-15	B9I5W9	Tubulin alpha chain	POPTR_0013s05340g	ident	22	49.685	10.529	1	8	1
Cellular Component	GO:0043228	3	non-membrane-bounded organelle	5.1742e-15	A9PCQ5	Pseudouridine synthase and archaeosine transglycosylase domain-containing family protein	POPTR_0005s02340g	ident	11	20.122	11.019	2	2	2
Cellular Component	GO:0043228	3	non-membrane-bounded organelle	5.1742e-15	U5G795	Histone H2B	POPTR_0008s03060g	ident	18.7	15.334	15.566	3	2	2
Cellular Component	GO:0043228	3	non-membrane-bounded organelle	5.1742e-15	B9IIY9	60S ribosomal protein L1	POPTR_0016s08520g	ident	28.7	44.968	84.115	17	11	4
Cellular Component	GO:0043228	3	non-membrane-bounded organelle	5.1742e-15	A9PB00	60S ribosomal protein L26B	POPTR_0007s06220g	ident	21.2	16.864	34.905	8	4	4
Cellular Component	GO:0043228	3	non-membrane-bounded organelle	5.1742e-15	U5GW75	50S ribosomal protein L13, chloroplastic OS=Arabidopsis thaliana GN=RPL13 PE=2 SV=1	POPTR_0001s39310g	ident	15.7	28.094	72.259	7	2	2
Cellular Component	GO:0043228	3	non-membrane-bounded organelle	5.1742e-15	A0A2K1YQW5	40S ribosomal protein S3a	POPTR_010G083200v3	ident	27.2	28.096	56.7	9	5	5
Cellular Component	GO:0043228	3	non-membrane-bounded organelle	5.1742e-15	A9PHS9	Ribosomal protein L13a	POPTR_0017s08170g	ident	21.8	23.661	13.146	2	5	2
Cellular Component	GO:0043228	3	non-membrane-bounded organelle	5.1742e-15	A0A2K1Z8F4	Structural maintenance of chromosomes protein 3 OS=Arabidopsis thaliana GN=SMC3 PE=2 SV=1	POPTR_009G155200v3	ident	3.4	125.61	31.348	3	3	3
Cellular Component	GO:0043228	3	non-membrane-bounded organelle	5.1742e-15	B9IN50	60S ribosomal protein L7-4 OS=Arabidopsis thaliana GN=RPL7D PE=2 SV=1	POPTR_0018s13700g	ident	33.3	33.34	86.281	4	8	1
Cellular Component	GO:0043228	3	non-membrane-bounded organelle	5.1742e-15	A9P8F6	40S ribosomal protein S27	POPTR_0001s12840g	ident	37.2	9.6301	37.155	9	4	4
Cellular Component	GO:0043228	3	non-membrane-bounded organelle	5.1742e-15	A9PHC1	60S ribosomal protein L14	POPTR_0002s03700g	ident	22.6	15.445	28.394	6	4	0
Cellular Component	GO:0043228	3	non-membrane-bounded organelle	5.1742e-15	B9H7I3	Replication factor C 37 kDa family protein	POPTR_0005s20370g	ident	10.5	38.041	16.827	3	3	3
Cellular Component	GO:0043228	3	non-membrane-bounded organelle	5.1742e-15	A9PDZ4	40S ribosomal protein S26	POPTR_0013s09160g	ident	35.9	14.978	16.314	2	4	1
Cellular Component	GO:0043228	3	non-membrane-bounded organelle	5.1742e-15	A4GYU9	30S ribosomal protein S3, chloroplastic	rps3	ident	41.3	25.252	83.681	12	9	9
Cellular Component	GO:0043228	3	non-membrane-bounded organelle	5.1742e-15	A9P8D7	60S ribosomal protein L27	POPTR_0001s35630g	ident	14.1	15.642	13.138	2	2	1
Cellular Component	GO:0043228	3	non-membrane-bounded organelle	5.1742e-15	A9PCW7	40S ribosomal protein S15a-5 OS=Arabidopsis thaliana GN=RPS15AE PE=2 SV=1	POPTR_0009s07560g	ident	14	14.842	11.884	2	2	2
Cellular Component	GO:0043228	3	non-membrane-bounded organelle	5.1742e-15	A9PCT1	50S ribosomal protein L24, chloroplastic OS=Nicotiana tabacum GN=RPL24 PE=1 SV=1	POPTR_0001s44110g	ident	11.9	21.549	28.889	4	2	2
Cellular Component	GO:0043228	3	non-membrane-bounded organelle	5.1742e-15	B9N1D8	Chloroplast 30S ribosomal protein S20	POPTR_0001s40700g	ident	14.3	20.245	15.007	3	2	2
Cellular Component	GO:0043228	3	non-membrane-bounded organelle	5.1742e-15	U5GQV8	60S ribosomal protein L18-2 OS=Arabidopsis thaliana GN=RPL18B PE=1 SV=2	POPTR_0002s20400g	ident	28.8	20.543	7.4025	2	5	1
Cellular Component	GO:0043228	3	non-membrane-bounded organelle	5.1742e-15	B9I801	60S ribosomal protein L13	POPTR_0013s02860g	ident	15.5	23.773	6.8769	2	4	1
Cellular Component	GO:0043228	3	non-membrane-bounded organelle	5.1742e-15	U5G0R0	Glycine-rich family protein	POPTR_0010s04410g	ident	15.4	30.316	23.503	4	3	2
Cellular Component	GO:0043228	3	non-membrane-bounded organelle	5.1742e-15	A9P7V9	HMG-Y-related protein A OS=Zea mays GN=HMGIY2 PE=1 SV=1	POPTR_0015s04390g	ident	2.1	50.584	5.9265	1	1	1
Cellular Component	GO:0043228	3	non-membrane-bounded organelle	5.1742e-15	B9I465	30S ribosomal protein S9 OS=Bartonella tribocorum (strain CIP 105476 / IBS 506) GN=rpsI PE=3 SV=1	POPTR_0012s12870g	ident	2.7	46.113	5.7027	1	1	1
Cellular Component	GO:0043228	3	non-membrane-bounded organelle	5.1742e-15	B9I1L9	60S ribosomal protein L36	POPTR_0011s07390g	ident	10.9	12.446	6.9095	1	1	1
Cellular Component	GO:0043228	3	non-membrane-bounded organelle	5.1742e-15	B9HPG0	60S acidic ribosomal protein P3	POPTR_0009s03780g	ident	6.9	11.777	6.125	1	1	1
Cellular Component	GO:0043228	3	non-membrane-bounded organelle	5.1742e-15	B9I8P1	50S ribosomal protein L5	POPTR_0014s08500g	ident	10.3	28.788	5.7136	1	2	1
Cellular Component	GO:0043228	3	non-membrane-bounded organelle	5.1742e-15	A0A2K1ZEW8	30S ribosomal protein S6 OS=Alcanivorax borkumensis (strain ATCC 700651 / DSM 11573 / NCIMB 13689 / SK2)GN=rpsF PE=3 SV=1	POPTR_008G101900v3	ident	3.8	34.125	6.4932	1	1	1
Cellular Component	GO:0043228	3	non-membrane-bounded organelle	5.1742e-15	A9P8L6	40S ribosomal protein S26	POPTR_0019s08500g	ident	36.4	15.064	59.219	7	5	2
Cellular Component	GO:0043228	3	non-membrane-bounded organelle	5.1742e-15	B9N0E1	50S ribosomal protein L7/L12 OS=Liberibacter africanus subsp. capensis GN=rplL PE=3 SV=1	POPTR_0004s23300g	ident	5.8	18.597	6.5752	1	1	1
Cellular Component	GO:0043228	3	non-membrane-bounded organelle	5.1742e-15	B9HT71	Ribosomal protein L33	POPTR_0010s20700g	ident	33.9	12.914	35.93	5	3	1
Cellular Component	GO:0043228	3	non-membrane-bounded organelle	5.1742e-15	U5GER1	HMG-Y-related protein A OS=Glycine max PE=2 SV=1	POPTR_0004s08590g	ident	9.7	19.515	5.6222	1	1	1
Cellular Component	GO:0043228	3	non-membrane-bounded organelle	5.1742e-15	A9PCH3	60S ribosomal protein L35	POPTR_0006s23060g	ident	13.8	14.338	6.0746	1	2	1
Cellular Component	GO:0043228	3	non-membrane-bounded organelle	5.1742e-15	A9P8I6	60S ribosomal protein L30 OS=Euphorbia esula GN=RPL30 PE=3 SV=1	POPTR_0007s06050g	ident	52.7	12.343	6.6426	1	5	1
Cellular Component	GO:0043228	3	non-membrane-bounded organelle	5.1742e-15	B9GJ65	50S ribosomal protein L11, chloroplastic OS=Arabidopsis thaliana GN=RPL11 PE=2 SV=1	POPTR_0001s45510g	ident	20	24.321	26.793	5	4	1
Cellular Component	GO:0043228	3	non-membrane-bounded organelle	5.1742e-15	A0A2K2C3Z6	Ribosomal protein	POPTR_001G262400v3	ident	29.9	37.715	15.328	3	9	2
Cellular Component	GO:0043228	3	non-membrane-bounded organelle	5.1742e-15	A0A2K1Y4Z5	30S ribosomal protein S16-1, chloroplastic OS=Arabidopsis thaliana GN=RPS16-1 PE=2 SV=1	POPTR_013G128200v3	ident	43.6	12.001	48.245	9	4	4
Cellular Component	GO:0043228	3	non-membrane-bounded organelle	5.1742e-15	B9HSB9	60S ribosome subunit biogenesis protein NIP7 homolog	POPTR_0010s02520g	ident	7.5	20.92	7.9105	1	1	1
Cellular Component	GO:0043228	3	non-membrane-bounded organelle	5.1742e-15	U5FT95	60S ribosomal protein L5 OS=Cucumis sativus GN=RPL5 PE=2 SV=1	POPTR_0013s13220g	ident	13.7	33.482	-2	1	4	0
Cellular Component	GO:0043228	3	non-membrane-bounded organelle	5.1742e-15	B9I5Y3	H/ACA ribonucleoprotein complex subunit	POPTR_0013s05490g	ident	7.8	21.313	7.0624	1	1	1
Cellular Component	GO:0043228	3	non-membrane-bounded organelle	5.1742e-15	A0A2K1ZEV8	30S ribosomal protein S1, chloroplastic OS=Spinacia oleracea GN=RPS1 PE=1 SV=1	POPTR_008G101100v3	ident	26.7	39.425	57.615	15	8	7
Cellular Component	GO:0043228	3	non-membrane-bounded organelle	5.1742e-15	B9GJH3	Cell division family protein	POPTR_0001s37020g	ident	16.6	42.887	112.96	4	4	4
Cellular Component	GO:0043228	3	non-membrane-bounded organelle	5.1742e-15	A9PC08	40S ribosomal protein S5	POPTR_0016s06310g	ident	22.2	22.927	49.976	16	5	5
Cellular Component	GO:0043228	3	non-membrane-bounded organelle	5.1742e-15	A0A2K2ACW7	40S ribosomal protein S6 OS=Asparagus officinalis GN=rps6 PE=2 SV=1	POPTR_005G072700v3	ident	10.8	22.266	12.842	3	2	2
Cellular Component	GO:0043228	3	non-membrane-bounded organelle	5.1742e-15	A9PCU0	60S ribosomal protein L22-2 OS=Arabidopsis thaliana GN=RPL22B PE=2 SV=1	POPTR_0005s02430g	ident	39.5	14.086	62.366	6	5	1
Cellular Component	GO:0043228	3	non-membrane-bounded organelle	5.1742e-15	B9IAF0	Ribosomal protein L6	POPTR_0014s15120g	ident	29.5	25.363	45.293	11	7	7
Cellular Component	GO:0043228	3	non-membrane-bounded organelle	5.1742e-15	A9PH95	30S ribosomal protein S5, chloroplastic OS=Arabidopsis thaliana GN=rps5 PE=2 SV=1	POPTR_0004s04550g	ident	13.2	33.993	35.013	8	4	4
Cellular Component	GO:0043228	3	non-membrane-bounded organelle	5.1742e-15	B9GHI0	VARICOSE family protein	POPTR_0001s47350g	ident	2.7	149.1	12.955	3	3	2
Cellular Component	GO:0043228	3	non-membrane-bounded organelle	5.1742e-15	A9PED8	50S ribosomal protein L5, chloroplastic OS=Arabidopsis thaliana GN=RPL5 PE=2 SV=1	POPTR_0002s15600g	ident	31.2	28.816	62.923	8	6	5
Cellular Component	GO:0043228	3	non-membrane-bounded organelle	5.1742e-15	A9PBU0	50S ribosomal protein L12-2	POPTR_0001s35230g	ident	21.4	19.636	15.106	2	2	2
Cellular Component	GO:0043228	3	non-membrane-bounded organelle	5.1742e-15	A9PD52	Sm-like protein LSM2	POPTR_0003s01050g	ident	14	10.707	6.1494	1	1	1
Cellular Component	GO:0043228	3	non-membrane-bounded organelle	5.1742e-15	B9I0P1	GA family protein	POPTR_0011s15170g	ident	32.1	21.954	7.6502	1	8	1
Cellular Component	GO:0043228	3	non-membrane-bounded organelle	5.1742e-15	A9PI62	50S ribosomal protein L9, chloroplastic OS=Arabidopsis thaliana GN=RPL9 PE=2 SV=1	POPTR_0004s22660g	ident	24.7	22.18	28.92	7	4	4
Cellular Component	GO:0043228	3	non-membrane-bounded organelle	5.1742e-15	B9I0J7	Uncharacterized protein	POPTR_0011s14710g	ident	2	81.659	10.878	2	2	2
Cellular Component	GO:0043228	3	non-membrane-bounded organelle	5.1742e-15	A0A2K1ZZ72	40S ribosomal protein S7	POPTR_006G087900v3	ident	40.3	17.866	66.571	11	6	2
Cellular Component	GO:0043228	3	non-membrane-bounded organelle	5.1742e-15	A0A2K1Y490	50S ribosomal protein L21, chloroplastic OS=Arabidopsis thaliana GN=RPL21 PE=2 SV=1	POPTR_013G112900v3	ident	11	24.931	17.047	2	2	2
Cellular Component	GO:0043228	3	non-membrane-bounded organelle	5.1742e-15	B9I3C7	Oleosin 5 OS=Arabidopsis thaliana GN=At3g01570 PE=2 SV=1	POPTR_0012s08530g	ident	7	15.933	9.4453	3	1	1
Cellular Component	GO:0043228	3	non-membrane-bounded organelle	5.1742e-15	A0A2K2ATD3	40S ribosomal protein S19-3 OS=Arabidopsis thaliana GN=RPS19C PE=2 SV=1	POPTR_004G118800v3	ident	51.7	13.446	96.375	18	7	5
Cellular Component	GO:0043228	3	non-membrane-bounded organelle	5.1742e-15	A0A2K2C4F0	60S ribosomal protein L6 OS=Mesembryanthemum crystallinum GN=RPL6 PE=2 SV=1	POPTR_001G271500v3	ident	3.8	23.761	5.7519	2	1	1
Cellular Component	GO:0043228	3	non-membrane-bounded organelle	5.1742e-15	B9HNW2	Nucleolar GTP-binding protein 1	POPTR_0009s05870g	ident	1.7	74.188	9.2244	1	1	1
Cellular Component	GO:0043228	3	non-membrane-bounded organelle	5.1742e-15	A0A2K1YPP2	60S ribosomal protein L17-2 OS=Arabidopsis thaliana GN=RPL17B PE=2 SV=2	POPTR_010G060400v3	ident	9.7	20.168	20.46	3	3	2
Cellular Component	GO:0043228	3	non-membrane-bounded organelle	5.1742e-15	B9HBM5	Ribonuclease II, chloroplastic/mitochondrial OS=Arabidopsis thaliana GN=RNR1 PE=2 SV=1	POPTR_0006s08640g	ident	6.1	88.816	23.022	4	4	4
Cellular Component	GO:0043228	3	non-membrane-bounded organelle	5.1742e-15	B9HHU6	Eukaryotic translation initiation factor 2 subunit alpha homolog OS=Arabidopsis thaliana GN=At2g40290 PE=1 SV=2	POPTR_0008s07250g	ident	15.2	38.539	9.1675	1	5	1
Cellular Component	GO:0043228	3	non-membrane-bounded organelle	5.1742e-15	A0A2K1Y5G8	50S ribosomal protein L2, chloroplastic OS=Populus trichocarpa GN=rpl2-A PE=3 SV=1	POPTR_013G138400v3	ident	18.4	26.486	41.427	4	3	3
Cellular Component	GO:0043228	3	non-membrane-bounded organelle	5.1742e-15	A9PBK6	40s ribosomal protein S23	POPTR_0006s13370g	ident	8.5	15.711	14.538	3	2	2
Cellular Component	GO:0043228	3	non-membrane-bounded organelle	5.1742e-15	A9PBR8	60S ribosomal protein L27	POPTR_0016s02040g	ident	14.1	15.674	-2	2	2	1
Cellular Component	GO:0043228	3	non-membrane-bounded organelle	5.1742e-15	B9GI54	Oleosin 5 OS=Arabidopsis thaliana GN=At3g01570 PE=2 SV=1	POPTR_0001s35270g	ident	11.2	22.882	38.586	36	3	3
Cellular Component	GO:0043228	3	non-membrane-bounded organelle	5.1742e-15	A0A2K1XZ64	40S ribosomal protein S4	POPTR_013G011000v3	ident	40.4	27.458	53.968	11	9	3
Cellular Component	GO:0043228	3	non-membrane-bounded organelle	5.1742e-15	A9PHP0	Tubulin beta chain	POPTR_009G067200v3	ident	16.6	50.017	27.622	3	7	1
Cellular Component	GO:0043228	3	non-membrane-bounded organelle	5.1742e-15	B9I117	Ribosomal protein L32	POPTR_0011s02900g	ident	25.6	15.662	27.47	8	3	1
Cellular Component	GO:0043228	3	non-membrane-bounded organelle	5.1742e-15	A9P894	60S acidic ribosomal protein P2 OS=Parthenium argentatum PE=3 SV=1	POPTR_004G185800v3	ident	79.8	11.415	191.77	14	7	3
Cellular Component	GO:0043228	3	non-membrane-bounded organelle	5.1742e-15	B9H671	Uncharacterized protein	POPTR_0005s10430g	ident	8.8	20.693	5.7211	1	1	1
Cellular Component	GO:0043228	3	non-membrane-bounded organelle	5.1742e-15	A9PHW0	40S ribosomal protein S3-3 OS=Arabidopsis thaliana GN=RPS3C PE=1 SV=1	POPTR_012G076800v3	ident	43.5	25.95	100.25	15	10	10
Cellular Component	GO:0043228	3	non-membrane-bounded organelle	5.1742e-15	B9MX86	Putative F-box protein At1g65770 OS=Arabidopsis thaliana GN=At1g65770 PE=4 SV=1	POPTR_0005s10750g	ident	3.5	45.797	8.2292	1	1	1
Cellular Component	GO:0043228	3	non-membrane-bounded organelle	5.1742e-15	A0A2K1Y5F4	50S ribosomal protein L22, chloroplastic OS=Populus trichocarpa GN=rpl22 PE=3 SV=1	POPTR_013G136600v3	ident	28.9	16.69	12.174	2	3	1
Cellular Component	GO:0043228	3	non-membrane-bounded organelle	5.1742e-15	B9IDB8	Probable mediator of RNA polymerase II transcription subunit 36b OS=Arabidopsis thaliana GN=MED36B PE=1 SV=1	POPTR_0015s12790g	ident	18.6	32.343	38.764	5	4	4
Cellular Component	GO:0043228	3	non-membrane-bounded organelle	5.1742e-15	A4GYV1	30S ribosomal protein S19, chloroplastic	rps19-1	ident	42.4	10.523	25.594	5	4	4
Cellular Component	GO:0043228	3	non-membrane-bounded organelle	5.1742e-15	A9P8S1	Ribosomal protein S16	POPTR_0001s31210g	ident	47.9	16.567	20.872	1	8	1
Cellular Component	GO:0043228	3	non-membrane-bounded organelle	5.1742e-15	U5GPA2	50S ribosomal protein L31 (Fragment)	POPTR_0002s03470g	ident	35.4	10.686	22.333	2	2	2
Cellular Component	GO:0043228	3	non-membrane-bounded organelle	5.1742e-15	B9N7F0	Small nuclear ribonucleoprotein	POPTR_0001s16680g	ident	12.5	14.639	7.2194	1	1	1
Cellular Component	GO:0043228	3	non-membrane-bounded organelle	5.1742e-15	B9H9L0	60S ribosomal protein L27a-2	POPTR_0006s21680g	ident	32.2	16.487	5.6733	0	4	1
Cellular Component	GO:0043228	3	non-membrane-bounded organelle	5.1742e-15	A9PE08	Ribosomal protein S13	POPTR_0002s14780g	ident	31.8	17.073	32.24	6	4	1
Cellular Component	GO:0043228	3	non-membrane-bounded organelle	5.1742e-15	B9GPA1	Ribosomal protein L15	POPTR_0002s14250g	ident	22.5	24.245	30.711	5	4	4
Cellular Component	GO:0043228	3	non-membrane-bounded organelle	5.1742e-15	A0A2K1ZFT9	30S ribosomal protein 3-1, chloroplastic OS=Arabidopsis thaliana GN=At1g68590 PE=2 SV=1	POPTR_008G118700v3	ident	6.6	20.566	5.7833	1	1	1
Cellular Component	GO:0043228	3	non-membrane-bounded organelle	5.1742e-15	B9INZ5	Protein SUPPRESSOR OF GENE SILENCING 3 OS=Solanum lycopersicum GN=SGS3 PE=1 SV=1	POPTR_0019s00300g	ident	1.7	74.542	6.9387	1	1	1
Cellular Component	GO:0043228	3	non-membrane-bounded organelle	5.1742e-15	A9P9M3	60S ribosomal protein L6	POPTR_0009s07020g	ident	8.6	25.887	22.061	3	2	2
Cellular Component	GO:0030136	10	clathrin-coated vesicle	0.0823002	B9HSM0	Clathrin heavy chain	POPTR_0010s19420g	ident	14.8	193.36	7.0998	2	24	1
Cellular Component	GO:0030136	10	clathrin-coated vesicle	0.0823002	B9HAE9	Clathrin assembly family protein	POPTR_0006s27110g	ident	1.5	72.452	5.9265	1	1	1
Cellular Component	GO:0030136	10	clathrin-coated vesicle	0.0823002	A0A2K2C4W2	Clathrin heavy chain	POPTR_001G278800v3	ident	23	167.31	99.658	8	31	6
Cellular Component	GO:0030136	10	clathrin-coated vesicle	0.0823002	B9IMW5	Probable clathrin assembly protein At4g32285 OS=Arabidopsis thaliana GN=At4g32285 PE=1 SV=2	POPTR_0018s12830g	ident	2.9	68.761	8.7401	1	1	1
Cellular Component	GO:0030136	10	clathrin-coated vesicle	0.0823002	A0A2K1Z4A0	Clathrin heavy chain	POPTR_009G073300v3	ident	21	188.35	322.83	52	32	8
Cellular Component	GO:0030136	10	clathrin-coated vesicle	0.0823002	U5FV61	Clathrin light chain	POPTR_0011s04920g	ident	6.2	35.419	41.527	3	3	3
Cellular Component	GO:0030136	10	clathrin-coated vesicle	0.0823002	A0A2K1ZD81	Clathrin heavy chain	POPTR_008G070600v3	ident	14	193.48	23.321	3	24	0
Cellular Component	GO:0016607	14	nuclear speck	0.131381	B9GK89	N6-adenosine-methyltransferase MT-A70-like OS=Arabidopsis thaliana GN=MTA PE=1 SV=2	POPTR_0001s11230g	ident	1.7	83.924	7.4496	1	1	1
Cellular Component	GO:0016607	14	nuclear speck	0.131381	B9HEU4	U2 snRNP auxiliary factor large subunit	POPTR_0007s12550g	ident	7.8	60.957	7.2111	1	3	1
Cellular Component	GO:0009538	11	photosystem I reaction center	0.0563177	A9PG57	Photosystem I 11K family protein	POPTR_0003s05110g	ident	7.6	15.187	7.1074	1	1	1
Cellular Component	GO:0009538	11	photosystem I reaction center	0.0563177	A9PI20	Photosystem I chain III family protein	POPTR_0001s11600g	ident	19.2	24.349	29.067	3	3	3
Cellular Component	GO:0009538	11	photosystem I reaction center	0.0563177	A0A2K1YR52	Photosystem I reaction center subunit II, chloroplastic OS=Cucumis sativus GN=psaD PE=1 SV=1	POPTR_010G089400v3	ident	24.1	18.538	42.247	6	3	3
Cellular Component	GO:1905368	4	peptidase complex	2.60902e-13	B9HR39	26S proteasome regulatory subunit S3 family protein	POPTR_0009s13920g	ident	27	55.453	103.74	17	11	4
Cellular Component	GO:1905368	4	peptidase complex	2.60902e-13	B9GR92	26S protease regulatory complex subunit 4 family protein	POPTR_0002s25390g	ident	23.3	49.694	15.806	5	8	2
Cellular Component	GO:1905368	4	peptidase complex	2.60902e-13	A9PG47	26S proteasome subunit 8 family protein	POPTR_0010s10860g	ident	45.5	47.997	143.14	18	14	3
Cellular Component	GO:1905368	4	peptidase complex	2.60902e-13	B9MYE3	26S proteasome non-ATPase regulatory subunit 2 homolog	POPTR_0017s04660g	ident	19.1	97.444	158.08	18	13	7
Cellular Component	GO:1905368	4	peptidase complex	2.60902e-13	B9IHJ0	26S proteasome subunit 7 family protein	POPTR_0016s02790g	ident	26.5	46.491	85.434	13	9	8
Cellular Component	GO:1905368	4	peptidase complex	2.60902e-13	A0A2K1ZJ15	Proteasome subunit beta type	POPTR_008G177000v3	ident	17	24.102	33.396	4	2	2
Cellular Component	GO:1905368	4	peptidase complex	2.60902e-13	B9HG65	26S proteasome regulatory subunit family protein	POPTR_0007s07080g	ident	17.2	50.548	51.666	9	7	2
Cellular Component	GO:1905368	4	peptidase complex	2.60902e-13	A9PAG0	Proteasome subunit alpha type	POPTR_0012s14980g	ident	56.2	25.625	134.71	16	11	11
Cellular Component	GO:1905368	4	peptidase complex	2.60902e-13	A9PCM5	Proteasome subunit alpha type	POPTR_0006s01040g	ident	20.8	27.4	9.6463	3	4	1
Cellular Component	GO:1905368	4	peptidase complex	2.60902e-13	B9IKK0	26S protease regulatory subunit 7 OS=Spinacia oleracea GN=RPT1 PE=2 SV=1	POPTR_0018s04900g	ident	31.9	47.96	101.47	14	11	2
Cellular Component	GO:1905368	4	peptidase complex	2.60902e-13	B9HGQ8	26S proteasome non-ATPase regulatory subunit 2 homolog	POPTR_0007s01200g	ident	11	97.703	-2	1	7	1
Cellular Component	GO:1905368	4	peptidase complex	2.60902e-13	A0A2K1Z1G0	Proteasome subunit alpha type	POPTR_009G020800v3	ident	23.3	27.367	7.5148	1	4	1
Cellular Component	GO:1905368	4	peptidase complex	2.60902e-13	A9PA94	26S proteasome non-ATPase regulatory subunit 7 family protein	POPTR_0010s19960g	ident	16.8	34.822	7.3105	1	5	1
Cellular Component	GO:1905368	4	peptidase complex	2.60902e-13	B9IBD9	26S proteasome regulatory subunit 4 homolog A OS=Arabidopsis thaliana GN=RPT2A PE=1 SV=1	POPTR_0014s18530g	ident	24.3	47.006	72.159	11	8	2
Cellular Component	GO:1905368	4	peptidase complex	2.60902e-13	B9IJG7	26S proteasome non-ATPase regulatory subunit 1 homolog	POPTR_0017s08150g	ident	7.7	109.37	101.47	10	6	6
Cellular Component	GO:1905368	4	peptidase complex	2.60902e-13	B9IKM7	Proteasome subunit beta	POPTR_0018s00740g	ident	28.7	27.379	110.24	9	5	3
Cellular Component	GO:1905368	4	peptidase complex	2.60902e-13	B9HDL1	Proteasome subunit alpha type	POPTR_0006s11140g	ident	38.2	27.307	25.15	6	8	2
Cellular Component	GO:1905368	4	peptidase complex	2.60902e-13	A9PAQ4	Proteasome subunit beta type 2-2 family protein	POPTR_0008s15530g	ident	27.8	23.22	7.0857	1	5	1
Cellular Component	GO:1905368	4	peptidase complex	2.60902e-13	B9HB21	26S proteasome regulatory subunit family protein	POPTR_0006s19820g	ident	5.7	22.827	6.4681	1	1	1
Cellular Component	GO:1905368	4	peptidase complex	2.60902e-13	A9P9K9	Proteasome subunit alpha type	POPTR_0005s25080g	ident	26.3	30.361	50.759	7	7	1
Cellular Component	GO:1905368	4	peptidase complex	2.60902e-13	A0A2K2AIF1	Proteasome subunit beta type	POPTR_005G180500v3	ident	12.7	21.045	72.615	5	4	4
Cellular Component	GO:1905368	4	peptidase complex	2.60902e-13	B9MUK8	26S protease regulatory subunit 7 family protein	POPTR_0001s16180g	ident	29.2	47.647	6.7098	1	10	1
Cellular Component	GO:1905368	4	peptidase complex	2.60902e-13	U5GDA1	Proteasome subunit alpha type	POPTR_0006s14260g	ident	41.1	27.312	76.512	16	9	3
Cellular Component	GO:1905368	4	peptidase complex	2.60902e-13	A9PA93	26S proteasome non-ATPase regulatory subunit family protein	POPTR_0001s10940g	ident	24.7	30.575	20.9	3	5	3
Cellular Component	GO:1905368	4	peptidase complex	2.60902e-13	B9HHL6	26S proteasome non-ATPase regulatory subunit 7 homolog A OS=Arabidopsis thaliana GN=RPN8A PE=1 SV=1	POPTR_0008s06550g	ident	24.5	34.836	55.492	10	6	2
Cellular Component	GO:1905368	4	peptidase complex	2.60902e-13	A0A2K2A7I6	Proteasome subunit beta	POPTR_006G242000v3	ident	24.3	27.695	53.898	2	4	2
Cellular Component	GO:1905368	4	peptidase complex	2.60902e-13	B9HUT6	Proteasome subunit beta type	POPTR_0010s09490g	ident	24.4	23.112	32.001	5	5	1
Cellular Component	GO:1905368	4	peptidase complex	2.60902e-13	A9PCW8	Proteasome subunit alpha type	POPTR_0004s18000g	ident	12.9	26.968	20.347	4	3	3
Cellular Component	GO:1905368	4	peptidase complex	2.60902e-13	B9HHL1	Microsomal signal peptidase 25 kDa subunit family protein	POPTR_0008s06490g	ident	18.5	21.268	25.69	4	4	4
Cellular Component	GO:1905368	4	peptidase complex	2.60902e-13	A0A2K2AQV9	Proteasome subunit beta type	POPTR_004G066000v3	ident	3.2	26.973	5.7045	1	1	1
Cellular Component	GO:1905368	4	peptidase complex	2.60902e-13	B9H1J7	26S proteasome regulatory subunit S3 family protein	POPTR_0004s18270g	ident	20.3	55.604	26.415	1	8	1
Cellular Component	GO:1905368	4	peptidase complex	2.60902e-13	A0A2K1X0X9	Proteasome subunit beta type	POPTR_018G145900v3	ident	37.2	22.403	69.139	10	8	8
Cellular Component	GO:1905368	4	peptidase complex	2.60902e-13	A0A2K1XRL7	Proteasome subunit beta type-1 OS=Petunia hybrida GN=PBF1 PE=2 SV=1	POPTR_014G069800v3	ident	22.9	19.296	31.011	7	4	4
Cellular Component	GO:1905368	4	peptidase complex	2.60902e-13	A0A2K2C1X5	Proteasome subunit alpha type	POPTR_001G224100v3	ident	25.2	24.126	62.335	6	4	1
Cellular Component	GO:1905368	4	peptidase complex	2.60902e-13	B9GZK9	26S proteasome regulatory subunit family protein	POPTR_0003s09720g	ident	12.2	44.452	12.095	2	4	2
Cellular Component	GO:1905368	4	peptidase complex	2.60902e-13	B9N4I9	26S proteasome AAA-ATPase subunit family protein	POPTR_0005s02520g	ident	21.3	47.387	68.754	12	9	8
Cellular Component	GO:1905368	4	peptidase complex	2.60902e-13	B9N7I3	Proteasome subunit alpha type	POPTR_0001s16310g	ident	36.7	26.031	51.833	8	7	2
Cellular Component	GO:1905368	4	peptidase complex	2.60902e-13	A9P9I1	Proteasome subunit alpha type	POPTR_0016s14640g	ident	38.2	27.23	7.2599	0	8	1
Cellular Component	GO:1905368	4	peptidase complex	2.60902e-13	A9PI71	26S proteasome non-ATPase regulatory subunit family protein	POPTR_0003s14270g	ident	30.3	30.704	54.675	8	7	5
Cellular Component	GO:1905368	4	peptidase complex	2.60902e-13	B9HLN6	19S proteosome subunit 9 family protein	POPTR_0008s04200g	ident	35.3	47.073	103.2	16	13	4
Cellular Component	GO:1905368	4	peptidase complex	2.60902e-13	B9GRL8	Proteasome subunit alpha type	POPTR_0002s03530g	ident	27.6	29.391	5.9823	1	7	1
Cellular Component	GO:1905368	4	peptidase complex	2.60902e-13	B9IH97	Proteasome subunit alpha type	POPTR_0016s01710g	ident	20.8	27.417	45.931	5	4	1
Cellular Component	GO:1905368	4	peptidase complex	2.60902e-13	B9HXP3	19S proteosome subunit 9 family protein	POPTR_0010s17140g	ident	32.2	47.099	39.579	4	12	1
Cellular Component	GO:1905368	4	peptidase complex	2.60902e-13	B9MU88	26S proteasome regulatory subunit family protein	POPTR_0001s01760g	ident	17.4	44.484	39.046	6	5	3
Cellular Component	GO:1905368	4	peptidase complex	2.60902e-13	B9HBB4	Adhesion regulating molecule family protein	POPTR_0006s07840g	ident	7.3	35.039	15.562	2	2	2
Cellular Component	GO:1905368	4	peptidase complex	2.60902e-13	A9PE34	Proteasome subunit alpha type	POPTR_0003s07010g	ident	32.1	26.003	22.458	1	6	1
Cellular Component	GO:1905368	4	peptidase complex	2.60902e-13	B9H5M5	26S proteasome regulatory subunit family protein	POPTR_0005s08930g	ident	17.9	50.527	11.556	2	7	2
Cellular Component	GO:0005743	12	mitochondrial inner membrane	6.26135e-10	B9GWN0	Cytochrome c oxidase family protein	POPTR_0003s05880g	ident	13.5	17.946	14.044	2	2	2
Cellular Component	GO:0005743	12	mitochondrial inner membrane	6.26135e-10	B9HCW1	Mitochondrial substrate carrier family protein	POPTR_0006s10070g	ident	3.1	43.153	6.5178	1	1	1
Cellular Component	GO:0005743	12	mitochondrial inner membrane	6.26135e-10	A9P967	Mitochondrial dicarboxylate/tricarboxylate transporter DTC OS=Arabidopsis thaliana GN=DTC PE=1 SV=1	POPTR_0001s04170g	ident	26.8	31.983	56.281	10	7	4
Cellular Component	GO:0005743	12	mitochondrial inner membrane	6.26135e-10	B9GP93	Probable mitochondrial import inner membrane translocase subunit TIM21 OS=Arabidopsis thaliana GN=TIM21 PE=1 SV=1	POPTR_0002s14160g	ident	5.5	26.802	6.1543	1	1	1
Cellular Component	GO:0005743	12	mitochondrial inner membrane	6.26135e-10	B9GZ18	Cytochrome b-c1 complex subunit Rieske, mitochondrial	POPTR_0003s16060g	ident	7.4	29.729	15.611	1	1	1
Cellular Component	GO:0005743	12	mitochondrial inner membrane	6.26135e-10	B9HLY0	Mitochondrial substrate carrier family protein	POPTR_0008s04330g	ident	3.9	93.077	37.304	3	3	3
Cellular Component	GO:0005743	12	mitochondrial inner membrane	6.26135e-10	A9P9M5	Cytochrome b-c1 complex subunit 8 OS=Solanum tuberosum PE=1 SV=2	POPTR_019G132000v3	ident	19	7.1245	7.311	2	1	1
Cellular Component	GO:0005743	12	mitochondrial inner membrane	6.26135e-10	B9I1A3	NLI interacting factor family protein	POPTR_0011s09550g	ident	3.6	41.549	7.5171	1	1	1
Cellular Component	GO:0005743	12	mitochondrial inner membrane	6.26135e-10	A9PB99	NADH-ubiquinone oxidoreductase 19 kDa subunit family protein	POPTR_0008s20110g	ident	15.9	12.031	12.291	2	2	2
Cellular Component	GO:0005743	12	mitochondrial inner membrane	6.26135e-10	B9IG38	UNCOUPLING family protein	POPTR_0016s11740g	ident	25.4	32.664	43.661	8	6	4
Cellular Component	GO:0005743	12	mitochondrial inner membrane	6.26135e-10	B9HGN8	ADP,ATP carrier protein 3, mitochondrial OS=Arabidopsis thaliana GN=AAC3 PE=1 SV=1	POPTR_0007s01010g	ident	16.6	41.07	24.247	5	6	3
Cellular Component	GO:0005743	12	mitochondrial inner membrane	6.26135e-10	B9HLY1	ATP synthase subunit d, mitochondrial	POPTR_0008s04340g	ident	17.9	19.919	8.0039	2	2	1
Cellular Component	GO:0005743	12	mitochondrial inner membrane	6.26135e-10	A0A2K2A7Y7	Cytochrome b-c1 complex subunit 7	POPTR_006G250000v3	ident	27	14.706	22.932	3	3	2
Cellular Component	GO:0005743	12	mitochondrial inner membrane	6.26135e-10	B9GFH9	Mitochondrial phosphate transporter family protein	POPTR_0001s32950g	ident	13.1	38.989	25.92	4	4	2
Cellular Component	GO:0005743	12	mitochondrial inner membrane	6.26135e-10	B9GFF3	Adenine nucleotide translocator family protein	POPTR_0001s27480g	ident	19.5	42.1	38.612	8	7	3
Cellular Component	GO:0005743	12	mitochondrial inner membrane	6.26135e-10	A0A2K1Z3R0	ADP,ATP carrier protein 1, mitochondrial OS=Gossypium hirsutum GN=ANT1 PE=2 SV=1	POPTR_009G062200v3	ident	22.2	41.086	62.524	16	8	4
Cellular Component	GO:0005743	12	mitochondrial inner membrane	6.26135e-10	B9H5P7	Dihydroorotate dehydrogenase (quinone), mitochondrial	POPTR_0005s09200g	ident	11.6	48.707	28.25	5	4	4
Cellular Component	GO:0005743	12	mitochondrial inner membrane	6.26135e-10	U5GAP9	Ubiquinone biosynthesis protein COQ9, mitochondrial OS=Xenopus tropicalis GN=coq9 PE=2 SV=1	POPTR_0006s14200g	ident	12.1	35.581	29.951	4	3	3
Cellular Component	GO:0005743	12	mitochondrial inner membrane	6.26135e-10	B9GS73	NADH-ubiquinone oxidoreductase 24 kDa subunit family protein	POPTR_0002s04610g	ident	17.3	28.277	31.964	7	5	5
Cellular Component	GO:0005743	12	mitochondrial inner membrane	6.26135e-10	A9P8N3	NADH2 dehydrogenase family protein	POPTR_0015s06500g	ident	20.6	12.591	6.3971	2	2	1
Cellular Component	GO:0005743	12	mitochondrial inner membrane	6.26135e-10	B9H3N1	NADH-ubiquinone oxidoreductase family protein	POPTR_0004s07040g	ident	31.6	19.418	56.407	5	4	4
Cellular Component	GO:0005743	12	mitochondrial inner membrane	6.26135e-10	B9H8N0	Uncharacterized protein	POPTR_0005s24660g	ident	10.7	23.106	11.224	2	2	2
Cellular Component	GO:0005743	12	mitochondrial inner membrane	6.26135e-10	B9GM71	ADP,ATP carrier protein, mitochondrial OS=Solanum tuberosum GN=ANT PE=2 SV=1	POPTR_0001s05690g	ident	11.2	42.061	-2	1	4	1
Cellular Component	GO:0005743	12	mitochondrial inner membrane	6.26135e-10	A9PC01	NADH2 dehydrogenase family protein	POPTR_0012s05350g	ident	29	12.613	29.023	6	3	2
Cellular Component	GO:0005743	12	mitochondrial inner membrane	6.26135e-10	B9MXP7	Succinate dehydrogenase [ubiquinone] flavoprotein subunit, mitochondrial	POPTR_0005s12530g	ident	12.4	70.164	7.013	1	6	1
Cellular Component	GO:0005743	12	mitochondrial inner membrane	6.26135e-10	B9IKU0	Cytochrome b-c1 complex subunit 7	POPTR_0018s01370g	ident	22.9	14.175	29.413	2	2	1
Cellular Component	GO:0005743	12	mitochondrial inner membrane	6.26135e-10	U5GS58	Mitochondrial carnitine/acylcarnitine carrier-like family protein	POPTR_0001s02500g	ident	15.5	30.343	24.822	4	4	4
Cellular Component	GO:0005743	12	mitochondrial inner membrane	6.26135e-10	A9PBU4	Uncharacterized protein	POPTR_0006s24810g	ident	11.5	14.045	11.01	3	2	0
Cellular Component	GO:0005743	12	mitochondrial inner membrane	6.26135e-10	B9HEW3	Succinate dehydrogenase [ubiquinone] flavoprotein subunit, mitochondrial	POPTR_0007s12750g	ident	27.2	69.859	198.88	11	11	6
Cellular Component	GO:0005743	12	mitochondrial inner membrane	6.26135e-10	B9HFT3	Cytochrome c oxidase subunit 6a, mitochondrial OS=Arabidopsis thaliana GN=COX6A PE=2 SV=1	POPTR_0007s14540g	ident	13.7	14.218	6.2338	1	1	1
Cellular Component	GO:0005743	12	mitochondrial inner membrane	6.26135e-10	B9H7R3	Cytochrome b-c1 complex subunit 6	POPTR_0005s21330g	ident	21.7	7.9962	9.8322	1	1	1
Cellular Component	GO:0005743	12	mitochondrial inner membrane	6.26135e-10	U5FES1	NADH dehydrogenase [ubiquinone] 1 alpha subcomplex subunit 12	POPTR_0019s07820g	ident	22.9	21.025	28.272	4	3	3
Cellular Component	GO:0005743	12	mitochondrial inner membrane	6.26135e-10	B9HIF7	Ubiquinone biosynthesis protein COQ4 homolog, mitochondrial	POPTR_0008s09670g	ident	8.3	25.9	9.7224	1	1	1
Cellular Component	GO:0005743	12	mitochondrial inner membrane	6.26135e-10	A0A2K1WWB4	Uncharacterized protein	POPTR_018G055600v3	ident	8	9.9045	5.6288	2	1	1
Cellular Component	GO:0005743	12	mitochondrial inner membrane	6.26135e-10	B9GIY4	Succinate dehydrogenase [ubiquinone] iron-sulfur subunit, mitochondrial	POPTR_0001s36050g	ident	19.3	32.125	40.364	5	4	4
Cellular Component	GO:0005743	12	mitochondrial inner membrane	6.26135e-10	B9HWA2	ATP synthase subunit beta	POPTR_0010s12680g	ident	46.2	59.81	323.31	54	19	18
Cellular Component	GO:0005743	12	mitochondrial inner membrane	6.26135e-10	B9H3E2	NADH dehydrogenase [ubiquinone] iron-sulfur protein 1, mitochondrial OS=Solanum tuberosum PE=2 SV=1	POPTR_0004s08110g	ident	19.8	79.963	87.934	15	12	6
Cellular Component	GO:0005743	12	mitochondrial inner membrane	6.26135e-10	A9PDH8	mRNA for epsilon subunit of mitochondrial F1-ATPase family protein	POPTR_0010s25640g	ident	31.4	7.7528	13.092	3	2	2
Cellular Component	GO:0005743	12	mitochondrial inner membrane	6.26135e-10	B9HRF5	Complex 1 family protein	POPTR_0009s12750g	ident	20.7	13.615	18.085	3	2	2
Cellular Component	GO:0005743	12	mitochondrial inner membrane	6.26135e-10	B9HU25	ATP synthase subunit d, mitochondrial	POPTR_0010s22480g	ident	16.1	19.659	27.314	5	3	2
Cellular Component	GO:0005743	12	mitochondrial inner membrane	6.26135e-10	A0A2K1YEM0	Mitochondrial pyruvate carrier	POPTR_011G023100v3	ident	50.9	6.4484	13.059	2	2	2
Cellular Component	GO:0005743	12	mitochondrial inner membrane	6.26135e-10	B9I3N6	Mitochondrial pyruvate carrier (Fragment)	POPTR_0012s09690g	ident	6	18.633	10.938	2	1	1
Cellular Component	GO:0005743	12	mitochondrial inner membrane	6.26135e-10	B9IG89	Mitochondrial substrate carrier family protein	POPTR_0016s12280g	ident	3.1	42.847	5.9953	1	1	1
Cellular Component	GO:0005743	12	mitochondrial inner membrane	6.26135e-10	B9N332	Mitochondrial import inner membrane translocase subunit Tim17 family protein	POPTR_0006s17850g	ident	4.1	22.836	5.9569	1	1	1
Cellular Component	GO:0005743	12	mitochondrial inner membrane	6.26135e-10	B9IK63	Mitochondrial processing peptidase beta subunit family protein	POPTR_0017s12800g	ident	25.6	58.604	38.02	5	10	5
Cellular Component	GO:0005840	8	ribosome	8.47933e-12	A9PBI3	Ribosomal protein L7Ae/L30e/S12e/Gadd45	POPTR_0013s12110g	ident	17.2	13.9	11.635	1	1	1
Cellular Component	GO:0005840	8	ribosome	8.47933e-12	A9PCW9	60S ribosomal protein L17-1	POPTR_0012s09860g	ident	16	20.406	6.8295	2	2	1
Cellular Component	GO:0005840	8	ribosome	8.47933e-12	B9GQP4	60S ribosomal protein L32-1 OS=Arabidopsis thaliana GN=RPL32A PE=2 SV=2	POPTR_0002s25050g	ident	30.8	15.586	8.8741	3	3	1
Cellular Component	GO:0005840	8	ribosome	8.47933e-12	A0A2K2BTN7	60S ribosomal protein L21-1 OS=Arabidopsis thaliana GN=RPL21A PE=2 SV=2	POPTR_001G071100v3	ident	13.8	15.017	6.6041	1	2	1
Cellular Component	GO:0005840	8	ribosome	8.47933e-12	B9IIV1	60S ribosomal protein L23a OS=Daucus carota GN=RPL23A PE=2 SV=1	POPTR_0016s08070g	ident	21.9	17.267	40.872	7	6	6
Cellular Component	GO:0005840	8	ribosome	8.47933e-12	B9H7W2	40S ribosomal protein S18	POPTR_0005s21860g	ident	27.6	17.581	12.255	1	4	1
Cellular Component	GO:0005840	8	ribosome	8.47933e-12	A9P8E8	40S ribosomal protein S18 OS=Arabidopsis thaliana GN=RPS18A PE=1 SV=1	POPTR_0002s05220g	ident	40.8	17.635	10.147	1	6	1
Cellular Component	GO:0005840	8	ribosome	8.47933e-12	B9HJ33	50S ribosomal protein L15, chloroplastic (Fragment) OS=Pisum sativum GN=RPL15 PE=2 SV=1	POPTR_0008s12000g	ident	23.6	27.204	52.726	8	6	6
Cellular Component	GO:0005840	8	ribosome	8.47933e-12	B9I1A1	30S ribosomal protein S10	POPTR_0011s09530g	ident	4.9	22.722	6.142	1	1	1
Cellular Component	GO:0005840	8	ribosome	8.47933e-12	A0A2K2AXF7	Ribosomal protein	POPTR_004G202800v3	ident	27.7	18.789	45.866	11	5	2
Cellular Component	GO:0005840	8	ribosome	8.47933e-12	A9PDL5	60S ribosomal protein L38 OS=Arabidopsis thaliana GN=RPL38A PE=3 SV=1	POPTR_0007s01660g	ident	53.6	8.0244	39.685	6	4	1
Cellular Component	GO:0005840	8	ribosome	8.47933e-12	A9P8K6	40S ribosomal protein S11	POPTR_0014s05220g	ident	14.5	17.917	10.771	2	2	1
Cellular Component	GO:0005840	8	ribosome	8.47933e-12	A9PI77	Ribosomal protein	POPTR_0007s11960g	ident	21.3	24.385	17.749	5	5	2
Cellular Component	GO:0005840	8	ribosome	8.47933e-12	B9HSR0	60S acidic ribosomal protein P0	POPTR_0010s19860g	ident	21.9	34.096	44.171	8	5	5
Cellular Component	GO:0005840	8	ribosome	8.47933e-12	A9PBS4	Ribosomal protein L19	POPTR_0001s15230g	ident	4.1	27.025	6.6816	2	1	1
Cellular Component	GO:0005840	8	ribosome	8.47933e-12	B9III1	50S ribosomal protein L22 OS=Sinorhizobium medicae (strain WSM419) GN=rplV PE=3 SV=1	POPTR_0016s06740g	ident	3.6	31.171	6.0571	1	1	1
Cellular Component	GO:0005840	8	ribosome	8.47933e-12	A4GYT5	30S ribosomal protein S12-A, chloroplastic	rps12-A	ident	17.1	13.639	12.843	2	2	2
Cellular Component	GO:0005840	8	ribosome	8.47933e-12	B9MUD1	60S ribosomal protein L13	POPTR_0001s01350g	ident	27.1	23.812	133.05	8	5	2
Cellular Component	GO:0005840	8	ribosome	8.47933e-12	A4GYU8	50S ribosomal protein L16, chloroplastic	rpl16	ident	42.2	15.413	36.466	7	4	2
Cellular Component	GO:0005840	8	ribosome	8.47933e-12	A0A2K1YXW6	60S ribosomal protein L35 OS=Euphorbia esula GN=RPL35 PE=2 SV=1	POPTR_010G212300v3	ident	9.7	11.87	12.316	2	2	1
Cellular Component	GO:0005840	8	ribosome	8.47933e-12	A9PC19	40S ribosomal protein S15a OS=Daucus carota GN=RPS15A PE=2 SV=3	POPTR_0008s05190g	ident	44.6	14.854	38.398	5	5	5
Cellular Component	GO:0005840	8	ribosome	8.47933e-12	A9P978	60S ribosomal protein L38	POPTR_0010s18850g	ident	53.6	8.0765	6.7098	1	4	1
Cellular Component	GO:0005840	8	ribosome	8.47933e-12	A0A2K1XL83	60S ribosomal protein L34 OS=Nicotiana tabacum GN=RPL34 PE=2 SV=1	POPTR_015G106500v3	ident	24.5	11.801	12.888	3	2	2
Cellular Component	GO:0005840	8	ribosome	8.47933e-12	B9H7A3	30S ribosomal protein S13, chloroplastic OS=Arabidopsis thaliana GN=RPS13 PE=2 SV=1	POPTR_0005s16160g	ident	23.8	18.745	39.201	8	5	5
Cellular Component	GO:0005840	8	ribosome	8.47933e-12	A0A2K1ZIR2	60S ribosomal protein L23 OS=Arabidopsis thaliana GN=RPL23A PE=2 SV=3	POPTR_008G171200v3	ident	49.6	13.424	81.631	10	5	5
Cellular Component	GO:0005840	8	ribosome	8.47933e-12	A0A2K2BZR0	Ribosomal protein L37	POPTR_001G183200v3	ident	12.2	9.5681	7.9058	1	1	1
Cellular Component	GO:0005840	8	ribosome	8.47933e-12	B9IGG6	40S ribosomal protein S4	POPTR_0016s13210g	ident	37.6	29.719	136.95	17	9	3
Cellular Component	GO:0005840	8	ribosome	8.47933e-12	B9HD67	60S ribosomal protein L27	POPTR_0006s02230g	ident	8.1	15.699	7.0164	2	1	1
Cellular Component	GO:0005840	8	ribosome	8.47933e-12	A9PBL6	40S ribosomal protein S24	POPTR_0030s00470g	ident	26.9	15.398	56.916	6	4	2
Cellular Component	GO:0005840	8	ribosome	8.47933e-12	A9PCX2	60S ribosomal protein L21	POPTR_0003s15780g	ident	11	18.753	5.6473	1	2	0
Cellular Component	GO:0005840	8	ribosome	8.47933e-12	A9PBW0	60S ribosomal protein L12	POPTR_0018s14210g	ident	33.9	17.645	37.731	8	4	4
Cellular Component	GO:0005840	8	ribosome	8.47933e-12	A9P9G9	60S ribosomal protein L28	POPTR_0001s19490g	ident	42.5	16.388	38.518	7	4	3
Cellular Component	GO:0005840	8	ribosome	8.47933e-12	A9P9A0	40S ribosomal protein S16	POPTR_0008s14940g	ident	57.6	16.402	60.008	17	9	2
Cellular Component	GO:0005840	8	ribosome	8.47933e-12	A0A2K2BIM1	60S ribosomal protein L37a OS=Gossypium hirsutum GN=RPL37A PE=3 SV=1	POPTR_002G140100v3	ident	25	7.1202	7.2194	1	1	1
Cellular Component	GO:0005840	8	ribosome	8.47933e-12	A9PC05	40S ribosomal protein S24	POPTR_0010s09820g	ident	26.9	15.332	14.763	3	4	1
Cellular Component	GO:0005840	8	ribosome	8.47933e-12	B9IBY8	40S ribosomal protein S13-2	POPTR_0014s06420g	ident	31.8	17.107	5.8011	1	4	1
Cellular Component	GO:0005840	8	ribosome	8.47933e-12	A4GYU7	50S ribosomal protein L14, chloroplastic	rpl14	ident	19.7	13.579	20.62	4	2	2
Cellular Component	GO:0005840	8	ribosome	8.47933e-12	A0A2K2A680	50S ribosomal protein L4, chloroplastic OS=Arabidopsis thaliana GN=RPL4 PE=2 SV=2	POPTR_006G221100v3	ident	3.6	30.94	5.6278	1	1	1
Cellular Component	GO:0005840	8	ribosome	8.47933e-12	A9PB01	30S ribosomal protein S9	POPTR_0014s03900g	ident	13.8	22.829	22.769	4	2	1
Cellular Component	GO:0005840	8	ribosome	8.47933e-12	A0A2K1XLI8	40S ribosomal protein SA	POPTR_015G112900v3	ident	41.3	31.698	171.53	19	10	3
Cellular Component	GO:0005840	8	ribosome	8.47933e-12	A9PBF7	60S ribosomal protein L18a	POPTR_0011s06730g	ident	27.5	21.331	43.621	6	6	6
Cellular Component	GO:0005840	8	ribosome	8.47933e-12	A9PCZ0	40S ribosomal protein S15 OS=Oryza sativa subsp. japonica GN=RPS15 PE=2 SV=2	POPTR_0002s04420g	ident	24.3	17.225	19.895	2	2	2
Cellular Component	GO:0005840	8	ribosome	8.47933e-12	A0A2K2B2X9	40S ribosomal protein SA	POPTR_003G071200v3	ident	29.6	31.981	111.82	10	8	3
Cellular Component	GO:0005840	8	ribosome	8.47933e-12	A0A2K2BKH7	60S acidic ribosomal protein P1 OS=Zea mays GN=RPP1A PE=1 SV=1	POPTR_002G179400v3	ident	34.6	11.218	62.9	2	1	1
Cellular Component	GO:0005840	8	ribosome	8.47933e-12	U5GAZ4	40S ribosomal protein S3a	POPTR_0005s05280g	ident	6.9	29.705	16.023	2	2	2
Cellular Component	GO:0005840	8	ribosome	8.47933e-12	B9I3F7	50S ribosomal protein L19, chloroplastic OS=Spinacia oleracea GN=RPL19 PE=1 SV=2	POPTR_0012s08870g	ident	3.3	27.425	-2	1	1	1
Cellular Component	GO:0005840	8	ribosome	8.47933e-12	A0A2K1XKK7	60S ribosomal protein L17-1 OS=Arabidopsis thaliana GN=RPL17A PE=2 SV=1	POPTR_015G094400v3	ident	24.5	16.057	14.047	2	3	1
Cellular Component	GO:0005840	8	ribosome	8.47933e-12	A0A2K2BUM7	30S ribosomal protein S6 alpha, chloroplastic OS=Arabidopsis thaliana GN=RPS6 PE=2 SV=1	POPTR_001G088300v3	ident	9.4	23.174	12.446	4	2	2
Cellular Component	GO:0005840	8	ribosome	8.47933e-12	A9PHY3	Ribosome-binding factor PSRP1, chloroplastic OS=Spinacia oleracea GN=PSRP1 PE=1 SV=2	POPTR_0015s00430g	ident	3.3	34.338	6.7848	2	1	1
Cellular Component	GO:0005840	8	ribosome	8.47933e-12	A9P9U4	60S ribosomal protein L22-1	POPTR_0002s20540g	ident	38.4	14.037	9.6252	1	5	1
Cellular Component	GO:0005840	8	ribosome	8.47933e-12	A9PB37	60S ribosomal protein L13a-2	POPTR_0001s32170g	ident	28.6	23.62	47.123	13	7	4
Cellular Component	GO:0005840	8	ribosome	8.47933e-12	B9HAL7	39S ribosomal protein L41-A, mitochondrial OS=Xenopus laevis GN=mrpl41-a PE=2 SV=1	POPTR_0006s07000g	ident	14.1	10.287	5.636	1	1	1
Cellular Component	GO:0005840	8	ribosome	8.47933e-12	A9PCN3	GA family protein	POPTR_0011s15080g	ident	32.1	21.917	7.6534	1	8	1
Cellular Component	GO:0005840	8	ribosome	8.47933e-12	A9P9L2	60S ribosomal protein L35a	POPTR_0010s20140g	ident	33.9	12.811	7.5472	1	3	1
Cellular Component	GO:0005840	8	ribosome	8.47933e-12	A4GYU4	30S ribosomal protein S11, chloroplastic	rps11	ident	10.9	14.954	9.1746	2	1	1
Cellular Component	GO:0005840	8	ribosome	8.47933e-12	B9HKS8	50S ribosomal protein L28, chloroplastic OS=Arabidopsis thaliana GN=RPL28 PE=2 SV=2	POPTR_0008s16970g	ident	8.7	11.807	6.2839	1	1	1
Cellular Component	GO:0005840	8	ribosome	8.47933e-12	U5G4E1	40S ribosomal protein S9-2 OS=Arabidopsis thaliana GN=RPS9C PE=1 SV=1	POPTR_0007s09750g	ident	35	22.962	18.04	2	9	1
Cellular Component	GO:0005840	8	ribosome	8.47933e-12	A9PD23	40S ribosomal protein S20	POPTR_0015s14510g	ident	42.3	13.682	40.39	9	6	6
Cellular Component	GO:0005840	8	ribosome	8.47933e-12	A4GYQ8	30S ribosomal protein S14, chloroplastic	rps14	ident	21	11.683	13.496	2	2	2
Cellular Component	GO:0005840	8	ribosome	8.47933e-12	B9IIC4	60S ribosomal protein L21-2 OS=Arabidopsis thaliana GN=RPL21E PE=2 SV=1	POPTR_0016s06110g	ident	25.6	18.753	25.649	2	2	1
Cellular Component	GO:0005840	8	ribosome	8.47933e-12	B9GJJ8	60S ribosomal protein L9 OS=Oryza sativa subsp. japonica GN=RPL9 PE=2 SV=3	POPTR_0001s45820g	ident	30.1	21.934	195.23	12	8	1
Cellular Component	GO:0005840	8	ribosome	8.47933e-12	U5FRN5	40S ribosomal protein S5-2 OS=Arabidopsis thaliana GN=RPS5B PE=1 SV=2	POPTR_0013s05290g	ident	11.7	16.179	11.277	2	2	2
Cellular Component	GO:0005840	8	ribosome	8.47933e-12	U5GX63	Ribosome maturation factor RimM OS=Synechococcus sp. (strain WH7803) GN=rimM PE=3 SV=1	POPTR_0001s34380g	ident	2.1	75.409	5.7615	1	1	1
Cellular Component	GO:0005840	8	ribosome	8.47933e-12	U5GXN9	Ribosomal protein S14 mitochondrial (Fragment)	POPTR_0001s44850g	ident	7.4	18.877	7.4455	1	1	1
Cellular Component	GO:0005840	8	ribosome	8.47933e-12	A0A2K2C7C7	50S ribosomal protein L27, chloroplastic OS=Arabidopsis thaliana GN=RPL27 PE=2 SV=1	POPTR_001G329500v3	ident	20	14.868	20.577	3	3	3
Cellular Component	GO:0005840	8	ribosome	8.47933e-12	B9GT02	40S ribosomal protein S12	POPTR_0002s05710g	ident	44.1	15.325	45.978	6	5	3
Cellular Component	GO:0005840	8	ribosome	8.47933e-12	A0A2K1Z561	40S ribosomal protein S29 OS=Triticum aestivum GN=RPS29 PE=1 SV=1	POPTR_009G090000v3	ident	37.5	6.4304	13.574	3	2	2
Cellular Component	GO:0005840	8	ribosome	8.47933e-12	A9P806	Ribosomal protein 1	POPTR_0005s21640g	ident	24.9	44.38	93.754	14	11	2
Cellular Component	GO:0005840	8	ribosome	8.47933e-12	U5G798	60S ribosomal protein L4-1 OS=Arabidopsis thaliana GN=RPL4A PE=1 SV=1	POPTR_0006s13470g	ident	26.7	41.553	20.248	3	10	3
Cellular Component	GO:0005840	8	ribosome	8.47933e-12	A0A2K2A437	60S ribosomal protein L11 OS=Medicago sativa GN=RPL11 PE=2 SV=1	POPTR_006G181500v3	ident	31.2	19.572	39.856	8	5	5
Cellular Component	GO:0005840	8	ribosome	8.47933e-12	A0A2K2AK20	40S ribosomal protein S18 OS=Arabidopsis thaliana GN=RPS18A PE=1 SV=1	POPTR_005G211200v3	ident	42.2	17.172	90.906	17	6	1
Cellular Component	GO:0005840	8	ribosome	8.47933e-12	A0A2K1XM94	40S ribosomal protein S13 OS=Glycine max GN=RPS13 PE=2 SV=1	POPTR_015G130000v3	ident	34.3	16.004	6.1825	1	4	1
Cellular Component	GO:0005840	8	ribosome	8.47933e-12	A4GYX3	30S ribosomal protein S15, chloroplastic	rps15	ident	43.3	10.663	34.437	5	5	5
Cellular Component	GO:0005840	8	ribosome	8.47933e-12	A0A2K1XB61	40S ribosomal protein S2-3 OS=Arabidopsis thaliana GN=RPS2C PE=1 SV=2	POPTR_016G055000v3	ident	28	29.147	140.95	14	7	7
Cellular Component	GO:0005840	8	ribosome	8.47933e-12	B9GP17	30S ribosomal protein S9	POPTR_0002s13330g	ident	13.7	22.985	9.4764	2	2	1
Cellular Component	GO:0005840	8	ribosome	8.47933e-12	A0A2K1YKM0	50S ribosomal protein L11, chloroplastic OS=Arabidopsis thaliana GN=RPL11 PE=2 SV=1	POPTR_011G150700v3	ident	22.4	23.148	6.379	2	4	1
Cellular Component	GO:0005840	8	ribosome	8.47933e-12	A0A2K2BZT7	30S ribosomal protein S17, chloroplastic OS=Arabidopsis thaliana GN=RPS17 PE=1 SV=1	POPTR_001G184000v3	ident	6.2	17.715	7.0152	1	1	1
Cellular Component	GO:0005840	8	ribosome	8.47933e-12	A0A2K1Z3E5	Ribosomal protein	POPTR_009G057100v3	ident	33.1	34.173	65.165	20	9	2
Cellular Component	GO:0005840	8	ribosome	8.47933e-12	A9P931	60S ribosomal protein L27a-3 OS=Arabidopsis thaliana GN=RPL27AC PE=2 SV=2	POPTR_0008s19110g	ident	32.2	16.501	33.148	5	4	1
Cellular Component	GO:0005840	8	ribosome	8.47933e-12	U5GIT3	Ribosomal protein S7	POPTR_0004s14780g	ident	16.7	23.76	70.516	5	4	4
Cellular Component	GO:0005840	8	ribosome	8.47933e-12	A9PCT0	Ribosomal protein L2	POPTR_0005s11780g	ident	21.5	28.198	35.409	9	4	4
Cellular Component	GO:0005840	8	ribosome	8.47933e-12	A9PGV4	GLUCOSE HYPERSENSITIVE 1 family protein	POPTR_0001s33910g	ident	7.4	20.288	6.8657	1	1	1
Cellular Component	GO:0005840	8	ribosome	8.47933e-12	U5FM21	40S ribosomal protein S8	POPTR_0017s14180g	ident	25.1	24.922	49.523	8	4	4
Cellular Component	GO:0005840	8	ribosome	8.47933e-12	A4GYT2	50S ribosomal protein L33, chloroplastic	rpl33	ident	15.2	7.8032	7.0916	1	1	1
Cellular Component	GO:0005840	8	ribosome	8.47933e-12	B9HK59	60S ribosomal protein L7-2	POPTR_0008s00840g	ident	28.8	28.267	15.315	2	8	2
Cellular Component	GO:0005840	8	ribosome	8.47933e-12	U5FXQ5	Uncharacterized protein	POPTR_0013s11310g	ident	5.3	21.149	7.1676	1	1	1
Cellular Component	GO:0005840	8	ribosome	8.47933e-12	A4GYP7	30S ribosomal protein S2, chloroplastic	rps2	ident	29.2	26.928	44.751	9	6	6
Cellular Component	GO:0005840	8	ribosome	8.47933e-12	A9PGL4	40S ribosomal protein S19	POPTR_0017s12780g	ident	38.5	15.864	32.463	5	5	4
Cellular Component	GO:0005840	8	ribosome	8.47933e-12	A9PFA8	60S ribosomal protein L5 OS=Cucumis sativus GN=RPL5 PE=2 SV=1	POPTR_0019s13040g	ident	18.5	33.846	48.468	11	5	1
Cellular Component	GO:0005840	8	ribosome	8.47933e-12	B9N6A1	Zinc finger family protein	POPTR_0006s29020g	ident	6.4	46.521	12.603	2	2	2
Cellular Component	GO:0005840	8	ribosome	8.47933e-12	B9IG72	PLASTID-SPECIFIC RIBOSOMAL protein 4	POPTR_0016s12110g	ident	8	12.283	7.9109	1	1	1
Cellular Component	GO:0005840	8	ribosome	8.47933e-12	A0A2K1YLX6	50S ribosomal protein L18, chloroplastic OS=Arabidopsis thaliana GN=RPL18 PE=2 SV=1	POPTR_010G005000v3	ident	41	13.404	30.057	3	3	3
Cellular Component	GO:0005840	8	ribosome	8.47933e-12	A0A2K1YCF4	40S ribosomal protein SA	POPTR_012G117600v3	ident	38.1	31.07	46.881	3	9	3
Cellular Component	GO:0005840	8	ribosome	8.47933e-12	B9IFW5	40S ribosomal protein S7	POPTR_0016s10560g	ident	32.5	22.034	17.869	2	6	2
Cellular Component	GO:0005840	8	ribosome	8.47933e-12	A0A2K1YQ57	60S ribosomal protein L14-2 OS=Arabidopsis thaliana GN=RPL14B PE=1 SV=1	POPTR_010G069900v3	ident	23	14.183	12.108	3	4	1
Cellular Component	GO:0005840	8	ribosome	8.47933e-12	A0A2K2A3P0	Uncharacterized protein	POPTR_006G170500v3	ident	4.6	24.418	7.1484	1	1	1
Cellular Component	GO:0005840	8	ribosome	8.47933e-12	A9PAL5	40S ribosomal protein S9-2 OS=Arabidopsis thaliana GN=RPS9C PE=1 SV=1	POPTR_0006s22630g	ident	35	22.998	124.86	14	10	2
Cellular Component	GO:0005840	8	ribosome	8.47933e-12	A0A2K2BNS4	60S ribosomal protein L13a-3 OS=Arabidopsis thaliana GN=RPL13AC PE=2 SV=1	POPTR_002G242600v3	ident	19.4	23.63	10.988	2	4	2
Cellular Component	GO:0005840	8	ribosome	8.47933e-12	A4GYU6	30S ribosomal protein S8, chloroplastic	rps8	ident	26.1	15.502	38.93	5	4	4
Cellular Component	GO:0005840	8	ribosome	8.47933e-12	A9PC56	40S ribosomal protein S11	POPTR_0002s14130g	ident	25.2	17.863	36.36	6	4	3
Cellular Component	GO:0005840	8	ribosome	8.47933e-12	A9PGG5	60S ribosomal protein L10	POPTR_0013s15560g	ident	21.4	24.893	36.099	7	4	4
Cellular Component	GO:0005840	8	ribosome	8.47933e-12	A9PEI9	60S ribosomal protein L7-2	POPTR_0010s25740g	ident	38.5	28.405	152.8	12	9	1
Cellular Component	GO:0005840	8	ribosome	8.47933e-12	B9IJJ7	Ribosomal protein L13	POPTR_0017s10450g	ident	9.3	23.616	12.523	2	2	2
Cellular Component	GO:0005840	8	ribosome	8.47933e-12	A0A2K2C1M8	40S ribosomal protein S14 OS=Zea mays PE=3 SV=1	POPTR_001G218700v3	ident	36.2	13.728	98.867	9	4	4
Cellular Component	GO:0005840	8	ribosome	8.47933e-12	A9PB80	Ribosomal protein 1	POPTR_0002s06680g	ident	22.4	44.532	5.9103	1	10	1
Cellular Component	GO:0005840	8	ribosome	8.47933e-12	A0A2K1Y2A1	50S ribosomal protein L3, chloroplastic (Fragment) OS=Nicotiana tabacum GN=RPL3 PE=2 SV=1	POPTR_013G070100v3	ident	10	30.464	27.435	5	3	3
Cellular Component	GO:0005840	8	ribosome	8.47933e-12	B9HU05	50S ribosomal protein L10, chloroplastic OS=Nicotiana tabacum GN=RPL10 PE=2 SV=1	POPTR_0010s22290g	ident	15	25.478	52.756	4	3	3
Cellular Component	GO:0005840	8	ribosome	8.47933e-12	A4GYR2	30S ribosomal protein S4, chloroplastic	rps4	ident	20.9	23.497	28.73	5	5	5
Cellular Component	GO:0005840	8	ribosome	8.47933e-12	A9PEJ6	40S ribosomal protein S17	POPTR_0008s01820g	ident	22.9	16.061	40.756	13	6	6
Cellular Component	GO:0005840	8	ribosome	8.47933e-12	A9PCQ5	Pseudouridine synthase and archaeosine transglycosylase domain-containing family protein	POPTR_0005s02340g	ident	11	20.122	11.019	2	2	2
Cellular Component	GO:0005840	8	ribosome	8.47933e-12	B9IIY9	60S ribosomal protein L1	POPTR_0016s08520g	ident	28.7	44.968	84.115	17	11	4
Cellular Component	GO:0005840	8	ribosome	8.47933e-12	U5GW75	50S ribosomal protein L13, chloroplastic OS=Arabidopsis thaliana GN=RPL13 PE=2 SV=1	POPTR_0001s39310g	ident	15.7	28.094	72.259	7	2	2
Cellular Component	GO:0005840	8	ribosome	8.47933e-12	A9PB00	60S ribosomal protein L26B	POPTR_0007s06220g	ident	21.2	16.864	34.905	8	4	4
Cellular Component	GO:0005840	8	ribosome	8.47933e-12	A0A2K1YQW5	40S ribosomal protein S3a	POPTR_010G083200v3	ident	27.2	28.096	56.7	9	5	5
Cellular Component	GO:0005840	8	ribosome	8.47933e-12	A9PHS9	Ribosomal protein L13a	POPTR_0017s08170g	ident	21.8	23.661	13.146	2	5	2
Cellular Component	GO:0005840	8	ribosome	8.47933e-12	B9IN50	60S ribosomal protein L7-4 OS=Arabidopsis thaliana GN=RPL7D PE=2 SV=1	POPTR_0018s13700g	ident	33.3	33.34	86.281	4	8	1
Cellular Component	GO:0005840	8	ribosome	8.47933e-12	A9P8F6	40S ribosomal protein S27	POPTR_0001s12840g	ident	37.2	9.6301	37.155	9	4	4
Cellular Component	GO:0005840	8	ribosome	8.47933e-12	A9PHC1	60S ribosomal protein L14	POPTR_0002s03700g	ident	22.6	15.445	28.394	6	4	0
Cellular Component	GO:0005840	8	ribosome	8.47933e-12	A9PDZ4	40S ribosomal protein S26	POPTR_0013s09160g	ident	35.9	14.978	16.314	2	4	1
Cellular Component	GO:0005840	8	ribosome	8.47933e-12	A4GYU9	30S ribosomal protein S3, chloroplastic	rps3	ident	41.3	25.252	83.681	12	9	9
Cellular Component	GO:0005840	8	ribosome	8.47933e-12	A9P8D7	60S ribosomal protein L27	POPTR_0001s35630g	ident	14.1	15.642	13.138	2	2	1
Cellular Component	GO:0005840	8	ribosome	8.47933e-12	A9PCW7	40S ribosomal protein S15a-5 OS=Arabidopsis thaliana GN=RPS15AE PE=2 SV=1	POPTR_0009s07560g	ident	14	14.842	11.884	2	2	2
Cellular Component	GO:0005840	8	ribosome	8.47933e-12	A9PCT1	50S ribosomal protein L24, chloroplastic OS=Nicotiana tabacum GN=RPL24 PE=1 SV=1	POPTR_0001s44110g	ident	11.9	21.549	28.889	4	2	2
Cellular Component	GO:0005840	8	ribosome	8.47933e-12	B9N1D8	Chloroplast 30S ribosomal protein S20	POPTR_0001s40700g	ident	14.3	20.245	15.007	3	2	2
Cellular Component	GO:0005840	8	ribosome	8.47933e-12	B9I801	60S ribosomal protein L13	POPTR_0013s02860g	ident	15.5	23.773	6.8769	2	4	1
Cellular Component	GO:0005840	8	ribosome	8.47933e-12	U5GQV8	60S ribosomal protein L18-2 OS=Arabidopsis thaliana GN=RPL18B PE=1 SV=2	POPTR_0002s20400g	ident	28.8	20.543	7.4025	2	5	1
Cellular Component	GO:0005840	8	ribosome	8.47933e-12	B9I465	30S ribosomal protein S9 OS=Bartonella tribocorum (strain CIP 105476 / IBS 506) GN=rpsI PE=3 SV=1	POPTR_0012s12870g	ident	2.7	46.113	5.7027	1	1	1
Cellular Component	GO:0005840	8	ribosome	8.47933e-12	B9I1L9	60S ribosomal protein L36	POPTR_0011s07390g	ident	10.9	12.446	6.9095	1	1	1
Cellular Component	GO:0005840	8	ribosome	8.47933e-12	B9HPG0	60S acidic ribosomal protein P3	POPTR_0009s03780g	ident	6.9	11.777	6.125	1	1	1
Cellular Component	GO:0005840	8	ribosome	8.47933e-12	B9I8P1	50S ribosomal protein L5	POPTR_0014s08500g	ident	10.3	28.788	5.7136	1	2	1
Cellular Component	GO:0005840	8	ribosome	8.47933e-12	A0A2K1ZEW8	30S ribosomal protein S6 OS=Alcanivorax borkumensis (strain ATCC 700651 / DSM 11573 / NCIMB 13689 / SK2)GN=rpsF PE=3 SV=1	POPTR_008G101900v3	ident	3.8	34.125	6.4932	1	1	1
Cellular Component	GO:0005840	8	ribosome	8.47933e-12	B9N0E1	50S ribosomal protein L7/L12 OS=Liberibacter africanus subsp. capensis GN=rplL PE=3 SV=1	POPTR_0004s23300g	ident	5.8	18.597	6.5752	1	1	1
Cellular Component	GO:0005840	8	ribosome	8.47933e-12	A9P8L6	40S ribosomal protein S26	POPTR_0019s08500g	ident	36.4	15.064	59.219	7	5	2
Cellular Component	GO:0005840	8	ribosome	8.47933e-12	B9HT71	Ribosomal protein L33	POPTR_0010s20700g	ident	33.9	12.914	35.93	5	3	1
Cellular Component	GO:0005840	8	ribosome	8.47933e-12	A9PCH3	60S ribosomal protein L35	POPTR_0006s23060g	ident	13.8	14.338	6.0746	1	2	1
Cellular Component	GO:0005840	8	ribosome	8.47933e-12	A9P8I6	60S ribosomal protein L30 OS=Euphorbia esula GN=RPL30 PE=3 SV=1	POPTR_0007s06050g	ident	52.7	12.343	6.6426	1	5	1
Cellular Component	GO:0005840	8	ribosome	8.47933e-12	B9GJ65	50S ribosomal protein L11, chloroplastic OS=Arabidopsis thaliana GN=RPL11 PE=2 SV=1	POPTR_0001s45510g	ident	20	24.321	26.793	5	4	1
Cellular Component	GO:0005840	8	ribosome	8.47933e-12	A0A2K2C3Z6	Ribosomal protein	POPTR_001G262400v3	ident	29.9	37.715	15.328	3	9	2
Cellular Component	GO:0005840	8	ribosome	8.47933e-12	A0A2K1Y4Z5	30S ribosomal protein S16-1, chloroplastic OS=Arabidopsis thaliana GN=RPS16-1 PE=2 SV=1	POPTR_013G128200v3	ident	43.6	12.001	48.245	9	4	4
Cellular Component	GO:0005840	8	ribosome	8.47933e-12	U5FT95	60S ribosomal protein L5 OS=Cucumis sativus GN=RPL5 PE=2 SV=1	POPTR_0013s13220g	ident	13.7	33.482	-2	1	4	0
Cellular Component	GO:0005840	8	ribosome	8.47933e-12	A0A2K1ZEV8	30S ribosomal protein S1, chloroplastic OS=Spinacia oleracea GN=RPS1 PE=1 SV=1	POPTR_008G101100v3	ident	26.7	39.425	57.615	15	8	7
Cellular Component	GO:0005840	8	ribosome	8.47933e-12	A9PC08	40S ribosomal protein S5	POPTR_0016s06310g	ident	22.2	22.927	49.976	16	5	5
Cellular Component	GO:0005840	8	ribosome	8.47933e-12	A0A2K2ACW7	40S ribosomal protein S6 OS=Asparagus officinalis GN=rps6 PE=2 SV=1	POPTR_005G072700v3	ident	10.8	22.266	12.842	3	2	2
Cellular Component	GO:0005840	8	ribosome	8.47933e-12	A9PCU0	60S ribosomal protein L22-2 OS=Arabidopsis thaliana GN=RPL22B PE=2 SV=1	POPTR_0005s02430g	ident	39.5	14.086	62.366	6	5	1
Cellular Component	GO:0005840	8	ribosome	8.47933e-12	B9IAF0	Ribosomal protein L6	POPTR_0014s15120g	ident	29.5	25.363	45.293	11	7	7
Cellular Component	GO:0005840	8	ribosome	8.47933e-12	A9PH95	30S ribosomal protein S5, chloroplastic OS=Arabidopsis thaliana GN=rps5 PE=2 SV=1	POPTR_0004s04550g	ident	13.2	33.993	35.013	8	4	4
Cellular Component	GO:0005840	8	ribosome	8.47933e-12	A9PED8	50S ribosomal protein L5, chloroplastic OS=Arabidopsis thaliana GN=RPL5 PE=2 SV=1	POPTR_0002s15600g	ident	31.2	28.816	62.923	8	6	5
Cellular Component	GO:0005840	8	ribosome	8.47933e-12	A9PBU0	50S ribosomal protein L12-2	POPTR_0001s35230g	ident	21.4	19.636	15.106	2	2	2
Cellular Component	GO:0005840	8	ribosome	8.47933e-12	B9I0P1	GA family protein	POPTR_0011s15170g	ident	32.1	21.954	7.6502	1	8	1
Cellular Component	GO:0005840	8	ribosome	8.47933e-12	A9PI62	50S ribosomal protein L9, chloroplastic OS=Arabidopsis thaliana GN=RPL9 PE=2 SV=1	POPTR_0004s22660g	ident	24.7	22.18	28.92	7	4	4
Cellular Component	GO:0005840	8	ribosome	8.47933e-12	A0A2K1ZZ72	40S ribosomal protein S7	POPTR_006G087900v3	ident	40.3	17.866	66.571	11	6	2
Cellular Component	GO:0005840	8	ribosome	8.47933e-12	A0A2K1Y490	50S ribosomal protein L21, chloroplastic OS=Arabidopsis thaliana GN=RPL21 PE=2 SV=1	POPTR_013G112900v3	ident	11	24.931	17.047	2	2	2
Cellular Component	GO:0005840	8	ribosome	8.47933e-12	A0A2K2ATD3	40S ribosomal protein S19-3 OS=Arabidopsis thaliana GN=RPS19C PE=2 SV=1	POPTR_004G118800v3	ident	51.7	13.446	96.375	18	7	5
Cellular Component	GO:0005840	8	ribosome	8.47933e-12	A0A2K2C4F0	60S ribosomal protein L6 OS=Mesembryanthemum crystallinum GN=RPL6 PE=2 SV=1	POPTR_001G271500v3	ident	3.8	23.761	5.7519	2	1	1
Cellular Component	GO:0005840	8	ribosome	8.47933e-12	A0A2K1YPP2	60S ribosomal protein L17-2 OS=Arabidopsis thaliana GN=RPL17B PE=2 SV=2	POPTR_010G060400v3	ident	9.7	20.168	20.46	3	3	2
Cellular Component	GO:0005840	8	ribosome	8.47933e-12	B9HHU6	Eukaryotic translation initiation factor 2 subunit alpha homolog OS=Arabidopsis thaliana GN=At2g40290 PE=1 SV=2	POPTR_0008s07250g	ident	15.2	38.539	9.1675	1	5	1
Cellular Component	GO:0005840	8	ribosome	8.47933e-12	A0A2K1Y5G8	50S ribosomal protein L2, chloroplastic OS=Populus trichocarpa GN=rpl2-A PE=3 SV=1	POPTR_013G138400v3	ident	18.4	26.486	41.427	4	3	3
Cellular Component	GO:0005840	8	ribosome	8.47933e-12	A9PBK6	40s ribosomal protein S23	POPTR_0006s13370g	ident	8.5	15.711	14.538	3	2	2
Cellular Component	GO:0005840	8	ribosome	8.47933e-12	A9PBR8	60S ribosomal protein L27	POPTR_0016s02040g	ident	14.1	15.674	-2	2	2	1
Cellular Component	GO:0005840	8	ribosome	8.47933e-12	A0A2K1XZ64	40S ribosomal protein S4	POPTR_013G011000v3	ident	40.4	27.458	53.968	11	9	3
Cellular Component	GO:0005840	8	ribosome	8.47933e-12	B9I117	Ribosomal protein L32	POPTR_0011s02900g	ident	25.6	15.662	27.47	8	3	1
Cellular Component	GO:0005840	8	ribosome	8.47933e-12	A9P894	60S acidic ribosomal protein P2 OS=Parthenium argentatum PE=3 SV=1	POPTR_004G185800v3	ident	79.8	11.415	191.77	14	7	3
Cellular Component	GO:0005840	8	ribosome	8.47933e-12	B9H671	Uncharacterized protein	POPTR_0005s10430g	ident	8.8	20.693	5.7211	1	1	1
Cellular Component	GO:0005840	8	ribosome	8.47933e-12	A9PHW0	40S ribosomal protein S3-3 OS=Arabidopsis thaliana GN=RPS3C PE=1 SV=1	POPTR_012G076800v3	ident	43.5	25.95	100.25	15	10	10
Cellular Component	GO:0005840	8	ribosome	8.47933e-12	A0A2K1Y5F4	50S ribosomal protein L22, chloroplastic OS=Populus trichocarpa GN=rpl22 PE=3 SV=1	POPTR_013G136600v3	ident	28.9	16.69	12.174	2	3	1
Cellular Component	GO:0005840	8	ribosome	8.47933e-12	A4GYV1	30S ribosomal protein S19, chloroplastic	rps19-1	ident	42.4	10.523	25.594	5	4	4
Cellular Component	GO:0005840	8	ribosome	8.47933e-12	A9P8S1	Ribosomal protein S16	POPTR_0001s31210g	ident	47.9	16.567	20.872	1	8	1
Cellular Component	GO:0005840	8	ribosome	8.47933e-12	B9H9L0	60S ribosomal protein L27a-2	POPTR_0006s21680g	ident	32.2	16.487	5.6733	0	4	1
Cellular Component	GO:0005840	8	ribosome	8.47933e-12	U5GPA2	50S ribosomal protein L31 (Fragment)	POPTR_0002s03470g	ident	35.4	10.686	22.333	2	2	2
Cellular Component	GO:0005840	8	ribosome	8.47933e-12	A9PE08	Ribosomal protein S13	POPTR_0002s14780g	ident	31.8	17.073	32.24	6	4	1
Cellular Component	GO:0005840	8	ribosome	8.47933e-12	B9GPA1	Ribosomal protein L15	POPTR_0002s14250g	ident	22.5	24.245	30.711	5	4	4
Cellular Component	GO:0005840	8	ribosome	8.47933e-12	A0A2K1ZFT9	30S ribosomal protein 3-1, chloroplastic OS=Arabidopsis thaliana GN=At1g68590 PE=2 SV=1	POPTR_008G118700v3	ident	6.6	20.566	5.7833	1	1	1
Cellular Component	GO:0005840	8	ribosome	8.47933e-12	A9P9M3	60S ribosomal protein L6	POPTR_0009s07020g	ident	8.6	25.887	22.061	3	2	2
Cellular Component	GO:0030125	13	clathrin vesicle coat	0.0137408	B9HSM0	Clathrin heavy chain	POPTR_0010s19420g	ident	14.8	193.36	7.0998	2	24	1
Cellular Component	GO:0030125	13	clathrin vesicle coat	0.0137408	A0A2K2C4W2	Clathrin heavy chain	POPTR_001G278800v3	ident	23	167.31	99.658	8	31	6
Cellular Component	GO:0030125	13	clathrin vesicle coat	0.0137408	A0A2K1Z4A0	Clathrin heavy chain	POPTR_009G073300v3	ident	21	188.35	322.83	52	32	8
Cellular Component	GO:0030125	13	clathrin vesicle coat	0.0137408	U5FV61	Clathrin light chain	POPTR_0011s04920g	ident	6.2	35.419	41.527	3	3	3
Cellular Component	GO:0030125	13	clathrin vesicle coat	0.0137408	A0A2K1ZD81	Clathrin heavy chain	POPTR_008G070600v3	ident	14	193.48	23.321	3	24	0
Cellular Component	GO:0071256	12	translocon complex	0.011805	A9PF90	Protein transport protein Sec61 subunit beta	POPTR_0014s05810g	ident	23.2	8.3487	15.276	3	2	2
Cellular Component	GO:0071256	12	translocon complex	0.011805	A9P8R8	Protein transport protein Sec61 subunit beta	POPTR_0009s01720g	ident	23.6	10.579	6.6138	1	1	1
Cellular Component	GO:0045252	10	oxoglutarate dehydrogenase complex	0.069571	B9I172	2-oxoacid dehydrogenase family protein	POPTR_0011s09160g	ident	9	50.721	25.043	4	4	4
Cellular Component	GO:0045252	10	oxoglutarate dehydrogenase complex	0.069571	B9HTM3	2-oxoglutarate dehydrogenase E1 component family protein	POPTR_0010s21610g	ident	25.3	115.88	171.8	25	18	18
Cellular Component	GO:0045239	8	tricarboxylic acid cycle enzyme complex	0.0294497	A0A2K2BLS5	Fumarate hydratase 1, mitochondrial OS=Arabidopsis thaliana GN=FUM1 PE=1 SV=2	POPTR_002G201300v3	ident	9	49.867	25.366	4	4	4
Cellular Component	GO:0045239	8	tricarboxylic acid cycle enzyme complex	0.0294497	B9I172	2-oxoacid dehydrogenase family protein	POPTR_0011s09160g	ident	9	50.721	25.043	4	4	4
Cellular Component	GO:0045239	8	tricarboxylic acid cycle enzyme complex	0.0294497	B9HTM3	2-oxoglutarate dehydrogenase E1 component family protein	POPTR_0010s21610g	ident	25.3	115.88	171.8	25	18	18
Cellular Component	GO:0005682	12	U5 snRNP	0.346612	B9I2D6	DEAD-box ATP-dependent RNA helicase 21 OS=Arabidopsis thaliana GN=RH21 PE=2 SV=1	POPTR_0012s04320g	ident	2.1	60.705	5.7551	1	1	1
Cellular Component	GO:0005682	12	U5 snRNP	0.346612	A9PCP7	Thioredoxin-like protein YLS8 OS=Arabidopsis thaliana GN=YLS8 PE=2 SV=1	POPTR_0007s07660g	ident	9.9	16.561	8.2478	1	1	1
Cellular Component	GO:0070469	4	respiratory chain	2.27777e-07	B9HEW3	Succinate dehydrogenase [ubiquinone] flavoprotein subunit, mitochondrial	POPTR_0007s12750g	ident	27.2	69.859	198.88	11	11	6
Cellular Component	GO:0070469	4	respiratory chain	2.27777e-07	B9GWN0	Cytochrome c oxidase family protein	POPTR_0003s05880g	ident	13.5	17.946	14.044	2	2	2
Cellular Component	GO:0070469	4	respiratory chain	2.27777e-07	B9HFT3	Cytochrome c oxidase subunit 6a, mitochondrial OS=Arabidopsis thaliana GN=COX6A PE=2 SV=1	POPTR_0007s14540g	ident	13.7	14.218	6.2338	1	1	1
Cellular Component	GO:0070469	4	respiratory chain	2.27777e-07	B9H7R3	Cytochrome b-c1 complex subunit 6	POPTR_0005s21330g	ident	21.7	7.9962	9.8322	1	1	1
Cellular Component	GO:0070469	4	respiratory chain	2.27777e-07	U5FES1	NADH dehydrogenase [ubiquinone] 1 alpha subcomplex subunit 12	POPTR_0019s07820g	ident	22.9	21.025	28.272	4	3	3
Cellular Component	GO:0070469	4	respiratory chain	2.27777e-07	B9GZ18	Cytochrome b-c1 complex subunit Rieske, mitochondrial	POPTR_0003s16060g	ident	7.4	29.729	15.611	1	1	1
Cellular Component	GO:0070469	4	respiratory chain	2.27777e-07	A9P9M5	Cytochrome b-c1 complex subunit 8 OS=Solanum tuberosum PE=1 SV=2	POPTR_019G132000v3	ident	19	7.1245	7.311	2	1	1
Cellular Component	GO:0070469	4	respiratory chain	2.27777e-07	B9H3E2	NADH dehydrogenase [ubiquinone] iron-sulfur protein 1, mitochondrial OS=Solanum tuberosum PE=2 SV=1	POPTR_0004s08110g	ident	19.8	79.963	87.934	15	12	6
Cellular Component	GO:0070469	4	respiratory chain	2.27777e-07	A9PB99	NADH-ubiquinone oxidoreductase 19 kDa subunit family protein	POPTR_0008s20110g	ident	15.9	12.031	12.291	2	2	2
Cellular Component	GO:0070469	4	respiratory chain	2.27777e-07	U5FVI3	Cytochrome c OS=Vigna radiata var. radiata PE=1 SV=1	POPTR_0013s10300g	ident	13.1	19.555	13.986	2	2	2
Cellular Component	GO:0070469	4	respiratory chain	2.27777e-07	B9HRF5	Complex 1 family protein	POPTR_0009s12750g	ident	20.7	13.615	18.085	3	2	2
Cellular Component	GO:0070469	4	respiratory chain	2.27777e-07	A0A2K2A7Y7	Cytochrome b-c1 complex subunit 7	POPTR_006G250000v3	ident	27	14.706	22.932	3	3	2
Cellular Component	GO:0070469	4	respiratory chain	2.27777e-07	A9P8N3	NADH2 dehydrogenase family protein	POPTR_0015s06500g	ident	20.6	12.591	6.3971	2	2	1
Cellular Component	GO:0070469	4	respiratory chain	2.27777e-07	B9GS73	NADH-ubiquinone oxidoreductase 24 kDa subunit family protein	POPTR_0002s04610g	ident	17.3	28.277	31.964	7	5	5
Cellular Component	GO:0070469	4	respiratory chain	2.27777e-07	B9IK63	Mitochondrial processing peptidase beta subunit family protein	POPTR_0017s12800g	ident	25.6	58.604	38.02	5	10	5
Cellular Component	GO:0070469	4	respiratory chain	2.27777e-07	A9PC01	NADH2 dehydrogenase family protein	POPTR_0012s05350g	ident	29	12.613	29.023	6	3	2
Cellular Component	GO:0070469	4	respiratory chain	2.27777e-07	B9IKU0	Cytochrome b-c1 complex subunit 7	POPTR_0018s01370g	ident	22.9	14.175	29.413	2	2	1
Cellular Component	GO:0070469	4	respiratory chain	2.27777e-07	B9MXP7	Succinate dehydrogenase [ubiquinone] flavoprotein subunit, mitochondrial	POPTR_0005s12530g	ident	12.4	70.164	7.013	1	6	1
Cellular Component	GO:0005852	8	eukaryotic translation initiation factor 3 complex	1.24113e-06	A0A2K2A8V5	Eukaryotic translation initiation factor 3 subunit B	POPTR_006G267500v3	ident	22.2	64.451	91.989	18	12	2
Cellular Component	GO:0005852	8	eukaryotic translation initiation factor 3 complex	1.24113e-06	A0A2K1X5T6	Eukaryotic translation initiation factor 3 subunit M	POPTR_017G095300v3	ident	6.1	46.753	15.784	4	2	2
Cellular Component	GO:0005852	8	eukaryotic translation initiation factor 3 complex	1.24113e-06	U5GFL8	Eukaryotic translation initiation factor 3 subunit A	POPTR_0005s02130g	ident	14	113.23	131.72	14	12	12
Cellular Component	GO:0005852	8	eukaryotic translation initiation factor 3 complex	1.24113e-06	B9IA95	Eukaryotic translation initiation factor 3 subunit H	POPTR_0014s14420g	ident	19.4	39.214	46.013	7	6	6
Cellular Component	GO:0005852	8	eukaryotic translation initiation factor 3 complex	1.24113e-06	A9PCS2	Eukaryotic translation initiation factor 3 subunit F	POPTR_0010s19940g	ident	17.1	31.535	26.775	4	4	4
Cellular Component	GO:0005852	8	eukaryotic translation initiation factor 3 complex	1.24113e-06	A9PHY6	Eukaryotic translation initiation factor 3 subunit E	POPTR_0006s04620g	ident	34.8	51.29	105.91	14	12	6
Cellular Component	GO:0005852	8	eukaryotic translation initiation factor 3 complex	1.24113e-06	B9HVP6	Eukaryotic translation initiation factor 3 subunit I	POPTR_0010s11040g	ident	30.5	35.803	81.03	8	6	3
Cellular Component	GO:0005852	8	eukaryotic translation initiation factor 3 complex	1.24113e-06	A9P7U1	Eukaryotic translation initiation factor 3 subunit G	POPTR_0008s06040g	ident	24.9	32.534	85.299	7	6	6
Cellular Component	GO:0005852	8	eukaryotic translation initiation factor 3 complex	1.24113e-06	B9H5B7	Eukaryotic translation initiation factor 3 subunit C	POPTR_0005s26650g	ident	4.8	101.7	5.7325	1	4	1
Cellular Component	GO:0005852	8	eukaryotic translation initiation factor 3 complex	1.24113e-06	B9H917	Eukaryotic translation initiation factor 3 subunit L	POPTR_0006s25800g	ident	13.1	60.92	62.036	6	6	6
Cellular Component	GO:0005852	8	eukaryotic translation initiation factor 3 complex	1.24113e-06	A0A2K2APU8	Eukaryotic translation initiation factor 3 subunit D	POPTR_004G044500v3	ident	10.8	62.955	31.279	7	5	5
Cellular Component	GO:0005852	8	eukaryotic translation initiation factor 3 complex	1.24113e-06	B9HJM0	Eukaryotic translation initiation factor 3 subunit I	POPTR_0008s14090g	ident	23	35.738	6.2346	2	4	1
Cellular Component	GO:0005852	8	eukaryotic translation initiation factor 3 complex	1.24113e-06	A0A2K1WU99	Eukaryotic translation initiation factor 3 subunit B	POPTR_018G015200v3	ident	21.3	64.28	13.441	2	12	2
Cellular Component	GO:0005852	8	eukaryotic translation initiation factor 3 complex	1.24113e-06	B9GQ78	Eukaryotic translation initiation factor 3 subunit C	POPTR_0002s01840g	ident	4.7	102.96	34.73	4	4	1
Cellular Component	GO:0005852	8	eukaryotic translation initiation factor 3 complex	1.24113e-06	A9PHP7	Eukaryotic translation initiation factor 3 subunit K	POPTR_0006s13880g	ident	22.6	26.851	33.453	6	4	4
Cellular Component	GO:0005852	8	eukaryotic translation initiation factor 3 complex	1.24113e-06	B9IHX4	Eukaryotic translation initiation factor 3 subunit E	POPTR_0016s04310g	ident	26.1	51.194	39.219	5	10	4
Cellular Component	GO:0009522	10	photosystem I	0.00385966	B9IAR5	Chlorophyll a-b binding protein, chloroplastic	POPTR_0014s16300g	ident	12.1	28.513	20.426	3	3	2
Cellular Component	GO:0009522	10	photosystem I	0.00385966	A0A2K1ZSI9	Photosystem I reaction center subunit N, chloroplastic OS=Arabidopsis thaliana GN=PSAN PE=1 SV=2	POPTR_007G105900v3	ident	6.8	15.515	6.5227	1	1	1
Cellular Component	GO:0009522	10	photosystem I	0.00385966	A4GYS2	Photosystem I assembly protein Ycf4	ycf4	ident	14.1	21.45	18.408	3	3	3
Cellular Component	GO:0009522	10	photosystem I	0.00385966	B9I013	Chlorophyll a-b binding protein, chloroplastic	POPTR_0011s12680g	ident	7.8	25.142	11.926	2	2	2
Cellular Component	GO:0009522	10	photosystem I	0.00385966	A4GYW7	Photosystem I iron-sulfur center	psaC	ident	51.9	9.0384	26.115	5	4	4
Cellular Component	GO:0009522	10	photosystem I	0.00385966	B9HCM1	Chlorophyll a-b binding protein, chloroplastic	POPTR_0006s10040g	ident	18.9	31.175	41.649	6	5	2
Cellular Component	GO:0009522	10	photosystem I	0.00385966	B9I107	Chlorophyll a-b binding protein, chloroplastic	POPTR_0011s02770g	ident	9.8	28.053	6.2295	1	2	1
Cellular Component	GO:0009522	10	photosystem I	0.00385966	A0A2K1YR52	Photosystem I reaction center subunit II, chloroplastic OS=Cucumis sativus GN=psaD PE=1 SV=1	POPTR_010G089400v3	ident	24.1	18.538	42.247	6	3	3
Cellular Component	GO:0009522	10	photosystem I	0.00385966	A9PG57	Photosystem I 11K family protein	POPTR_0003s05110g	ident	7.6	15.187	7.1074	1	1	1
Cellular Component	GO:0009522	10	photosystem I	0.00385966	A9PGZ3	Chlorophyll a-b binding protein, chloroplastic	POPTR_0019s09140g	ident	29.3	30.924	53.113	9	6	6
Cellular Component	GO:0009522	10	photosystem I	0.00385966	A9PI20	Photosystem I chain III family protein	POPTR_0001s11600g	ident	19.2	24.349	29.067	3	3	3
Cellular Component	GO:0009522	10	photosystem I	0.00385966	A4GYQ9	Photosystem I P700 chlorophyll a apoprotein A2	psaB	ident	4.4	82.417	18.966	4	3	3
Cellular Component	GO:0009522	10	photosystem I	0.00385966	A4GYR0	Photosystem I P700 chlorophyll a apoprotein A1	psaA	ident	7.3	83.145	36.829	11	6	6
Cellular Component	GO:0009522	10	photosystem I	0.00385966	A9PE75	Chlorophyll a-b binding protein, chloroplastic	POPTR_0014s17070g	ident	15.7	29.605	14.206	2	2	2
Cellular Component	GO:0030130	14	clathrin coat of trans-Golgi network vesicle	0.0137408	B9HSM0	Clathrin heavy chain	POPTR_0010s19420g	ident	14.8	193.36	7.0998	2	24	1
Cellular Component	GO:0030130	14	clathrin coat of trans-Golgi network vesicle	0.0137408	A0A2K2C4W2	Clathrin heavy chain	POPTR_001G278800v3	ident	23	167.31	99.658	8	31	6
Cellular Component	GO:0030130	14	clathrin coat of trans-Golgi network vesicle	0.0137408	A0A2K1Z4A0	Clathrin heavy chain	POPTR_009G073300v3	ident	21	188.35	322.83	52	32	8
Cellular Component	GO:0030130	14	clathrin coat of trans-Golgi network vesicle	0.0137408	U5FV61	Clathrin light chain	POPTR_0011s04920g	ident	6.2	35.419	41.527	3	3	3
Cellular Component	GO:0030130	14	clathrin coat of trans-Golgi network vesicle	0.0137408	A0A2K1ZD81	Clathrin heavy chain	POPTR_008G070600v3	ident	14	193.48	23.321	3	24	0
Cellular Component	GO:0030137	11	COPI-coated vesicle	2.60483e-06	A0A2K1Z6C5	Coatomer subunit gamma	POPTR_009G115100v3	ident	14.5	90.668	24.689	3	8	3
Cellular Component	GO:0030137	11	COPI-coated vesicle	2.60483e-06	B9IEK6	Coatomer subunit alpha	POPTR_0015s08110g	ident	26.8	136.52	271.21	34	26	8
Cellular Component	GO:0030137	11	COPI-coated vesicle	2.60483e-06	B9I345	Coatomer subunit alpha	POPTR_0012s07650g	ident	22.5	136.9	24.152	3	22	4
Cellular Component	GO:0030137	11	COPI-coated vesicle	2.60483e-06	B9N680	Coatomer subunit beta	POPTR_0006s28810g	ident	16.2	105.57	86.794	14	11	8
Cellular Component	GO:0030137	11	COPI-coated vesicle	2.60483e-06	B9GWZ6	Coatomer subunit beta'	POPTR_0003s05500g	ident	10.5	104.14	7.1645	2	9	1
Cellular Component	GO:0030137	11	COPI-coated vesicle	2.60483e-06	B9ICR4	Coatomer subunit delta	POPTR_0015s14960g	ident	5.9	58.317	6.7489	1	3	1
Cellular Component	GO:0030137	11	COPI-coated vesicle	2.60483e-06	B9ILF4	Coatomer subunit beta	POPTR_0018s03560g	ident	8.2	105.98	33.295	4	6	3
Cellular Component	GO:0030137	11	COPI-coated vesicle	2.60483e-06	B9H0P9	Coatomer subunit gamma	POPTR_0004s16090g	ident	14.6	98.519	85.64	8	9	4
Cellular Component	GO:0030137	11	COPI-coated vesicle	2.60483e-06	B9I0V9	Coatomer subunit epsilon	POPTR_0011s15930g	ident	17.2	32.178	35.563	5	4	4
Cellular Component	GO:0017102	8	methionyl glutamyl tRNA synthetase complex	0.011805	B9IQ63	Probable methionine--tRNA ligase OS=Oryza sativa subsp. japonica GN=Os06g0508700 PE=2 SV=2	POPTR_0019s08680g	ident	4.2	46.882	11.878	2	2	2
Cellular Component	GO:0017102	8	methionyl glutamyl tRNA synthetase complex	0.011805	B9N8K9	tRNA-binding region domain-containing family protein	POPTR_0017s00530g	ident	19.6	30.053	25.854	5	4	4
Cellular Component	GO:0030956	6	glutamyl-tRNA(Gln) amidotransferase complex	0.00411053	B9HKV7	Glutamyl-tRNA(Gln) amidotransferase subunit B, chloroplastic/mitochondrial	GATB	ident	11.5	59.901	39.571	5	5	5
Cellular Component	GO:0030956	6	glutamyl-tRNA(Gln) amidotransferase complex	0.00411053	U5FHW1	Glutamyl-tRNA(Gln) amidotransferase subunit A, chloroplastic/mitochondrial	GATA	ident	2.4	57.765	8.0883	1	1	1
Cellular Component	GO:0016272	4	prefoldin complex	5.77524e-05	B9H5Q0	Probable prefoldin subunit 5 OS=Arabidopsis thaliana GN=At5g23290 PE=2 SV=1	POPTR_0005s09240g	ident	19.6	17.208	16.44	2	2	1
Cellular Component	GO:0016272	4	prefoldin complex	5.77524e-05	A0A2K2C2S9	Probable prefoldin subunit 2 OS=Arabidopsis thaliana GN=At3g22480 PE=2 SV=1	POPTR_001G240200v3	ident	19.3	15.519	17.755	3	3	3
Cellular Component	GO:0016272	4	prefoldin complex	5.77524e-05	B9I5G4	Prefoldin subunit 4	POPTR_0013s03940g	ident	14.3	14.627	20.754	2	2	2
Cellular Component	GO:0016272	4	prefoldin complex	5.77524e-05	A9PE04	Prefoldin subunit 4	POPTR_0005s05620g	ident	23.8	14.54	19.739	3	3	3
Cellular Component	GO:0016272	4	prefoldin complex	5.77524e-05	B9H401	Prefoldin family protein	POPTR_0004s13700g	ident	20	14.676	18.339	4	3	3
Cellular Component	GO:0016272	4	prefoldin complex	5.77524e-05	A0A2K1ZYQ2	Prefoldin subunit 1 OS=Homo sapiens GN=PFDN1 PE=1 SV=2	POPTR_006G079700v3	ident	25.8	14.814	26.732	4	3	3
Cellular Component	GO:0016272	4	prefoldin complex	5.77524e-05	B9HGF4	Probable prefoldin subunit 5 OS=Arabidopsis thaliana GN=At5g23290 PE=2 SV=1	POPTR_0007s07470g	ident	14.6	17.159	5.6625	1	2	1
Cellular Component	GO:0016272	4	prefoldin complex	5.77524e-05	A0A2K1ZEZ8	Prefoldin subunit 3	POPTR_008G103400v3	ident	11.6	20.196	13.805	3	2	2
Cellular Component	GO:0005744	14	mitochondrial inner membrane presequence translocase complex	0.266232	B9I1A3	NLI interacting factor family protein	POPTR_0011s09550g	ident	3.6	41.549	7.5171	1	1	1
Cellular Component	GO:0005744	14	mitochondrial inner membrane presequence translocase complex	0.266232	B9GP93	Probable mitochondrial import inner membrane translocase subunit TIM21 OS=Arabidopsis thaliana GN=TIM21 PE=1 SV=1	POPTR_0002s14160g	ident	5.5	26.802	6.1543	1	1	1
Cellular Component	GO:0005744	14	mitochondrial inner membrane presequence translocase complex	0.266232	B9N332	Mitochondrial import inner membrane translocase subunit Tim17 family protein	POPTR_0006s17850g	ident	4.1	22.836	5.9569	1	1	1
Cellular Component	GO:0030173	12	integral component of Golgi membrane	0.158596	B9N466	Golgi apparatus membrane protein TVP23	POPTR_0005s01380g	ident	7.7	20.785	14.243	1	2	2
Cellular Component	GO:0030173	12	integral component of Golgi membrane	0.158596	B9HHJ9	Uncharacterized protein	POPTR_0008s06350g	ident	14.3	8.6092	6.7666	1	1	1
Cellular Component	GO:0030173	12	integral component of Golgi membrane	0.158596	U5FHM4	Protein YIF1B-A OS=Xenopus laevis GN=yif1b-a PE=2 SV=1	POPTR_0017s05720g	ident	5.6	30.06	14.871	1	1	1
Cellular Component	GO:0030173	12	integral component of Golgi membrane	0.158596	B9I6P4	Golgi apparatus membrane protein TVP23	POPTR_0013s00770g	ident	7.7	20.866	10.245	1	1	1
Cellular Component	GO:0005911	3	cell-cell junction	0.00988733	U5GHJ2	Multi-copper oxidase type 1 family protein	POPTR_0004s01070g	ident	11.6	61.554	44.607	6	6	4
Cellular Component	GO:0005911	3	cell-cell junction	0.00988733	B9GMG6	POTASSIUM CHANNEL BETA SUBUNIT family protein	POPTR_0001s14260g	ident	21.3	36.513	108.57	8	5	5
Cellular Component	GO:0005911	3	cell-cell junction	0.00988733	A9PCI6	RALF-LIKE 23 family protein	POPTR_0005s02590g	ident	7.5	13.263	7.9811	1	1	1
Cellular Component	GO:0005911	3	cell-cell junction	0.00988733	B9H5E3	Multi-copper oxidase type 1 family protein	POPTR_0005s26900g	ident	8.9	61.381	14.76	4	4	2
Cellular Component	GO:0005911	3	cell-cell junction	0.00988733	A9PA83	Histone H4	POPTR_0005s11740g	ident	33	11.409	37.629	10	5	3
Cellular Component	GO:0005911	3	cell-cell junction	0.00988733	B9IHJ0	26S proteasome subunit 7 family protein	POPTR_0016s02790g	ident	26.5	46.491	85.434	13	9	8
Cellular Component	GO:0005911	3	cell-cell junction	0.00988733	B9I4N2	Putative calmodulin-binding family protein	POPTR_0012s14720g	ident	12.6	46.434	63.132	7	6	4
Cellular Component	GO:0005911	3	cell-cell junction	0.00988733	A9PA39	Annexin	POPTR_0002s09610g	ident	23.4	35.967	73.177	9	7	7
Cellular Component	GO:0005911	3	cell-cell junction	0.00988733	B9I5Q6	Probable inactive ATP-dependent zinc metalloprotease FTSHI 5, chloroplastic OS=Arabidopsis thaliana GN=FTSHI5 PE=2 SV=1	POPTR_0013s04620g	ident	2.9	149.95	25.495	4	4	4
Cellular Component	GO:0005911	3	cell-cell junction	0.00988733	B9GIK2	GDSL esterase/lipase At5g14450 OS=Arabidopsis thaliana GN=At5g14450 PE=2 SV=1	POPTR_0001s35620g	ident	10.7	42.709	21.16	4	3	3
Cellular Component	GO:0005911	3	cell-cell junction	0.00988733	B9HRT8	LONG-CHAIN ACYL-COA SYNTHETASE 2 family protein	POPTR_0009s11300g	ident	4.3	73.432	18.24	3	3	3
Cellular Component	GO:0005911	3	cell-cell junction	0.00988733	B9I4W8	Glutamate decarboxylase	POPTR_0012s03610g	ident	12.8	56.651	64.405	8	6	6
Cellular Component	GO:0005911	3	cell-cell junction	0.00988733	B9H1N4	L-ascorbate oxidase homolog OS=Brassica napus GN=Bp10 PE=2 SV=1	POPTR_0004s18730g	ident	4.2	61.022	6.5902	1	2	1
Cellular Component	GO:0005911	3	cell-cell junction	0.00988733	B9IAG4	L-ascorbate oxidase homolog OS=Brassica napus GN=Bp10 PE=2 SV=1	POPTR_0014s15260g	ident	3.6	58.876	6.3445	1	2	1
Cellular Component	GO:0005911	3	cell-cell junction	0.00988733	B9I6B2	Rhicadhesin receptor family protein	POPTR_0013s00240g	ident	16.7	22.641	21.166	3	3	3
Cellular Component	GO:0055044	2	symplast	0.00851287	U5GHJ2	Multi-copper oxidase type 1 family protein	POPTR_0004s01070g	ident	11.6	61.554	44.607	6	6	4
Cellular Component	GO:0055044	2	symplast	0.00851287	B9GMG6	POTASSIUM CHANNEL BETA SUBUNIT family protein	POPTR_0001s14260g	ident	21.3	36.513	108.57	8	5	5
Cellular Component	GO:0055044	2	symplast	0.00851287	A9PCI6	RALF-LIKE 23 family protein	POPTR_0005s02590g	ident	7.5	13.263	7.9811	1	1	1
Cellular Component	GO:0055044	2	symplast	0.00851287	B9H5E3	Multi-copper oxidase type 1 family protein	POPTR_0005s26900g	ident	8.9	61.381	14.76	4	4	2
Cellular Component	GO:0055044	2	symplast	0.00851287	A9PA83	Histone H4	POPTR_0005s11740g	ident	33	11.409	37.629	10	5	3
Cellular Component	GO:0055044	2	symplast	0.00851287	B9IHJ0	26S proteasome subunit 7 family protein	POPTR_0016s02790g	ident	26.5	46.491	85.434	13	9	8
Cellular Component	GO:0055044	2	symplast	0.00851287	B9I4N2	Putative calmodulin-binding family protein	POPTR_0012s14720g	ident	12.6	46.434	63.132	7	6	4
Cellular Component	GO:0055044	2	symplast	0.00851287	A9PA39	Annexin	POPTR_0002s09610g	ident	23.4	35.967	73.177	9	7	7
Cellular Component	GO:0055044	2	symplast	0.00851287	B9I5Q6	Probable inactive ATP-dependent zinc metalloprotease FTSHI 5, chloroplastic OS=Arabidopsis thaliana GN=FTSHI5 PE=2 SV=1	POPTR_0013s04620g	ident	2.9	149.95	25.495	4	4	4
Cellular Component	GO:0055044	2	symplast	0.00851287	B9GIK2	GDSL esterase/lipase At5g14450 OS=Arabidopsis thaliana GN=At5g14450 PE=2 SV=1	POPTR_0001s35620g	ident	10.7	42.709	21.16	4	3	3
Cellular Component	GO:0055044	2	symplast	0.00851287	B9HRT8	LONG-CHAIN ACYL-COA SYNTHETASE 2 family protein	POPTR_0009s11300g	ident	4.3	73.432	18.24	3	3	3
Cellular Component	GO:0055044	2	symplast	0.00851287	B9I4W8	Glutamate decarboxylase	POPTR_0012s03610g	ident	12.8	56.651	64.405	8	6	6
Cellular Component	GO:0055044	2	symplast	0.00851287	B9H1N4	L-ascorbate oxidase homolog OS=Brassica napus GN=Bp10 PE=2 SV=1	POPTR_0004s18730g	ident	4.2	61.022	6.5902	1	2	1
Cellular Component	GO:0055044	2	symplast	0.00851287	B9IAG4	L-ascorbate oxidase homolog OS=Brassica napus GN=Bp10 PE=2 SV=1	POPTR_0014s15260g	ident	3.6	58.876	6.3445	1	2	1
Cellular Component	GO:0055044	2	symplast	0.00851287	B9I6B2	Rhicadhesin receptor family protein	POPTR_0013s00240g	ident	16.7	22.641	21.166	3	3	3
Cellular Component	GO:0015030	14	Cajal body	0.0224709	A9PC09	Nucleolar RNA-binding Nop10p family protein	POPTR_0002s03780g	ident	23.4	7.4765	6.6722	1	1	1
Cellular Component	GO:0015030	14	Cajal body	0.0224709	B9IDB8	Probable mediator of RNA polymerase II transcription subunit 36b OS=Arabidopsis thaliana GN=MED36B PE=1 SV=1	POPTR_0015s12790g	ident	18.6	32.343	38.764	5	4	4
Cellular Component	GO:0015030	14	Cajal body	0.0224709	U5G0R0	Glycine-rich family protein	POPTR_0010s04410g	ident	15.4	30.316	23.503	4	3	2
Cellular Component	GO:0030662	11	coated vesicle membrane	8.91073e-08	A0A2K1Z6C5	Coatomer subunit gamma	POPTR_009G115100v3	ident	14.5	90.668	24.689	3	8	3
Cellular Component	GO:0030662	11	coated vesicle membrane	8.91073e-08	B9IEK6	Coatomer subunit alpha	POPTR_0015s08110g	ident	26.8	136.52	271.21	34	26	8
Cellular Component	GO:0030662	11	coated vesicle membrane	8.91073e-08	B9I345	Coatomer subunit alpha	POPTR_0012s07650g	ident	22.5	136.9	24.152	3	22	4
Cellular Component	GO:0030662	11	coated vesicle membrane	8.91073e-08	B9HSM0	Clathrin heavy chain	POPTR_0010s19420g	ident	14.8	193.36	7.0998	2	24	1
Cellular Component	GO:0030662	11	coated vesicle membrane	8.91073e-08	B9ICR4	Coatomer subunit delta	POPTR_0015s14960g	ident	5.9	58.317	6.7489	1	3	1
Cellular Component	GO:0030662	11	coated vesicle membrane	8.91073e-08	B9GWZ6	Coatomer subunit beta'	POPTR_0003s05500g	ident	10.5	104.14	7.1645	2	9	1
Cellular Component	GO:0030662	11	coated vesicle membrane	8.91073e-08	A0A2K2C4W2	Clathrin heavy chain	POPTR_001G278800v3	ident	23	167.31	99.658	8	31	6
Cellular Component	GO:0030662	11	coated vesicle membrane	8.91073e-08	B9I0V9	Coatomer subunit epsilon	POPTR_0011s15930g	ident	17.2	32.178	35.563	5	4	4
Cellular Component	GO:0030662	11	coated vesicle membrane	8.91073e-08	B9GGU0	Transport family protein	POPTR_0001s31490g	ident	11.4	85.897	11.226	1	6	1
Cellular Component	GO:0030662	11	coated vesicle membrane	8.91073e-08	A0A2K1ZC12	Protein transport protein Sec24-like At3g07100 OS=Arabidopsis thaliana GN=At3g07100 PE=2 SV=2	POPTR_008G049700v3	ident	7.8	106.64	47.634	6	7	7
Cellular Component	GO:0030662	11	coated vesicle membrane	8.91073e-08	U5FV61	Clathrin light chain	POPTR_0011s04920g	ident	6.2	35.419	41.527	3	3	3
Cellular Component	GO:0030662	11	coated vesicle membrane	8.91073e-08	B9GTA0	Transport family protein	POPTR_0002s18820g	ident	3	95.046	15.052	2	2	2
Cellular Component	GO:0030662	11	coated vesicle membrane	8.91073e-08	B9GIJ5	Vesicle tethering family protein	POPTR_0001s35520g	ident	12.7	101.22	65.244	8	8	8
Cellular Component	GO:0030662	11	coated vesicle membrane	8.91073e-08	B9MYW1	Sec23/sec24 transport family protein	POPTR_0004s21200g	ident	7	82.593	34.332	4	4	4
Cellular Component	GO:0030662	11	coated vesicle membrane	8.91073e-08	A0A2K1ZD81	Clathrin heavy chain	POPTR_008G070600v3	ident	14	193.48	23.321	3	24	0
Cellular Component	GO:0030662	11	coated vesicle membrane	8.91073e-08	A9P9H7	Vesicle transport v-SNARE 13 OS=Arabidopsis thaliana GN=VTI13 PE=2 SV=1	POPTR_0017s12360g	ident	22.7	24.862	33.854	6	3	2
Cellular Component	GO:0030662	11	coated vesicle membrane	8.91073e-08	B9N680	Coatomer subunit beta	POPTR_0006s28810g	ident	16.2	105.57	86.794	14	11	8
Cellular Component	GO:0030662	11	coated vesicle membrane	8.91073e-08	B9N2K4	Transport family protein	POPTR_0019s01710g	ident	15.2	85.951	71.556	9	8	3
Cellular Component	GO:0030662	11	coated vesicle membrane	8.91073e-08	A0A2K1Y0H6	Protein transport protein Sec24-like At4g32640 OS=Arabidopsis thaliana GN=At4g32640 PE=2 SV=3	POPTR_013G035800v3	ident	5.1	101.8	22.141	5	3	3
Cellular Component	GO:0030662	11	coated vesicle membrane	8.91073e-08	B9ILF4	Coatomer subunit beta	POPTR_0018s03560g	ident	8.2	105.98	33.295	4	6	3
Cellular Component	GO:0030662	11	coated vesicle membrane	8.91073e-08	B9H0P9	Coatomer subunit gamma	POPTR_0004s16090g	ident	14.6	98.519	85.64	8	9	4
Cellular Component	GO:0030662	11	coated vesicle membrane	8.91073e-08	A0A2K1Z4A0	Clathrin heavy chain	POPTR_009G073300v3	ident	21	188.35	322.83	52	32	8
Cellular Component	GO:0030140	11	trans-Golgi network transport vesicle	0.0137408	B9HSM0	Clathrin heavy chain	POPTR_0010s19420g	ident	14.8	193.36	7.0998	2	24	1
Cellular Component	GO:0030140	11	trans-Golgi network transport vesicle	0.0137408	A0A2K2C4W2	Clathrin heavy chain	POPTR_001G278800v3	ident	23	167.31	99.658	8	31	6
Cellular Component	GO:0030140	11	trans-Golgi network transport vesicle	0.0137408	A0A2K1Z4A0	Clathrin heavy chain	POPTR_009G073300v3	ident	21	188.35	322.83	52	32	8
Cellular Component	GO:0030140	11	trans-Golgi network transport vesicle	0.0137408	U5FV61	Clathrin light chain	POPTR_0011s04920g	ident	6.2	35.419	41.527	3	3	3
Cellular Component	GO:0030140	11	trans-Golgi network transport vesicle	0.0137408	A0A2K1ZD81	Clathrin heavy chain	POPTR_008G070600v3	ident	14	193.48	23.321	3	24	0
Cellular Component	GO:0019866	9	organelle inner membrane	3.66924e-10	B9GWN0	Cytochrome c oxidase family protein	POPTR_0003s05880g	ident	13.5	17.946	14.044	2	2	2
Cellular Component	GO:0019866	9	organelle inner membrane	3.66924e-10	B9HCW1	Mitochondrial substrate carrier family protein	POPTR_0006s10070g	ident	3.1	43.153	6.5178	1	1	1
Cellular Component	GO:0019866	9	organelle inner membrane	3.66924e-10	A9P967	Mitochondrial dicarboxylate/tricarboxylate transporter DTC OS=Arabidopsis thaliana GN=DTC PE=1 SV=1	POPTR_0001s04170g	ident	26.8	31.983	56.281	10	7	4
Cellular Component	GO:0019866	9	organelle inner membrane	3.66924e-10	B9GP93	Probable mitochondrial import inner membrane translocase subunit TIM21 OS=Arabidopsis thaliana GN=TIM21 PE=1 SV=1	POPTR_0002s14160g	ident	5.5	26.802	6.1543	1	1	1
Cellular Component	GO:0019866	9	organelle inner membrane	3.66924e-10	B9GZ18	Cytochrome b-c1 complex subunit Rieske, mitochondrial	POPTR_0003s16060g	ident	7.4	29.729	15.611	1	1	1
Cellular Component	GO:0019866	9	organelle inner membrane	3.66924e-10	B9HLY0	Mitochondrial substrate carrier family protein	POPTR_0008s04330g	ident	3.9	93.077	37.304	3	3	3
Cellular Component	GO:0019866	9	organelle inner membrane	3.66924e-10	A9P9M5	Cytochrome b-c1 complex subunit 8 OS=Solanum tuberosum PE=1 SV=2	POPTR_019G132000v3	ident	19	7.1245	7.311	2	1	1
Cellular Component	GO:0019866	9	organelle inner membrane	3.66924e-10	B9I1A3	NLI interacting factor family protein	POPTR_0011s09550g	ident	3.6	41.549	7.5171	1	1	1
Cellular Component	GO:0019866	9	organelle inner membrane	3.66924e-10	A9PB99	NADH-ubiquinone oxidoreductase 19 kDa subunit family protein	POPTR_0008s20110g	ident	15.9	12.031	12.291	2	2	2
Cellular Component	GO:0019866	9	organelle inner membrane	3.66924e-10	B9IG38	UNCOUPLING family protein	POPTR_0016s11740g	ident	25.4	32.664	43.661	8	6	4
Cellular Component	GO:0019866	9	organelle inner membrane	3.66924e-10	B9HGN8	ADP,ATP carrier protein 3, mitochondrial OS=Arabidopsis thaliana GN=AAC3 PE=1 SV=1	POPTR_0007s01010g	ident	16.6	41.07	24.247	5	6	3
Cellular Component	GO:0019866	9	organelle inner membrane	3.66924e-10	B9HLY1	ATP synthase subunit d, mitochondrial	POPTR_0008s04340g	ident	17.9	19.919	8.0039	2	2	1
Cellular Component	GO:0019866	9	organelle inner membrane	3.66924e-10	A0A2K2A7Y7	Cytochrome b-c1 complex subunit 7	POPTR_006G250000v3	ident	27	14.706	22.932	3	3	2
Cellular Component	GO:0019866	9	organelle inner membrane	3.66924e-10	B9GFH9	Mitochondrial phosphate transporter family protein	POPTR_0001s32950g	ident	13.1	38.989	25.92	4	4	2
Cellular Component	GO:0019866	9	organelle inner membrane	3.66924e-10	B9GFF3	Adenine nucleotide translocator family protein	POPTR_0001s27480g	ident	19.5	42.1	38.612	8	7	3
Cellular Component	GO:0019866	9	organelle inner membrane	3.66924e-10	A0A2K1Z3R0	ADP,ATP carrier protein 1, mitochondrial OS=Gossypium hirsutum GN=ANT1 PE=2 SV=1	POPTR_009G062200v3	ident	22.2	41.086	62.524	16	8	4
Cellular Component	GO:0019866	9	organelle inner membrane	3.66924e-10	A9PA48	Tic20 family protein	POPTR_0013s08250g	ident	6.2	23.218	7.3359	1	1	1
Cellular Component	GO:0019866	9	organelle inner membrane	3.66924e-10	B9H5P7	Dihydroorotate dehydrogenase (quinone), mitochondrial	POPTR_0005s09200g	ident	11.6	48.707	28.25	5	4	4
Cellular Component	GO:0019866	9	organelle inner membrane	3.66924e-10	U5GAP9	Ubiquinone biosynthesis protein COQ9, mitochondrial OS=Xenopus tropicalis GN=coq9 PE=2 SV=1	POPTR_0006s14200g	ident	12.1	35.581	29.951	4	3	3
Cellular Component	GO:0019866	9	organelle inner membrane	3.66924e-10	B9GS73	NADH-ubiquinone oxidoreductase 24 kDa subunit family protein	POPTR_0002s04610g	ident	17.3	28.277	31.964	7	5	5
Cellular Component	GO:0019866	9	organelle inner membrane	3.66924e-10	A9P8N3	NADH2 dehydrogenase family protein	POPTR_0015s06500g	ident	20.6	12.591	6.3971	2	2	1
Cellular Component	GO:0019866	9	organelle inner membrane	3.66924e-10	B9H3N1	NADH-ubiquinone oxidoreductase family protein	POPTR_0004s07040g	ident	31.6	19.418	56.407	5	4	4
Cellular Component	GO:0019866	9	organelle inner membrane	3.66924e-10	B9H8N0	Uncharacterized protein	POPTR_0005s24660g	ident	10.7	23.106	11.224	2	2	2
Cellular Component	GO:0019866	9	organelle inner membrane	3.66924e-10	B9GM71	ADP,ATP carrier protein, mitochondrial OS=Solanum tuberosum GN=ANT PE=2 SV=1	POPTR_0001s05690g	ident	11.2	42.061	-2	1	4	1
Cellular Component	GO:0019866	9	organelle inner membrane	3.66924e-10	A9PC01	NADH2 dehydrogenase family protein	POPTR_0012s05350g	ident	29	12.613	29.023	6	3	2
Cellular Component	GO:0019866	9	organelle inner membrane	3.66924e-10	B9MXP7	Succinate dehydrogenase [ubiquinone] flavoprotein subunit, mitochondrial	POPTR_0005s12530g	ident	12.4	70.164	7.013	1	6	1
Cellular Component	GO:0019866	9	organelle inner membrane	3.66924e-10	B9IKU0	Cytochrome b-c1 complex subunit 7	POPTR_0018s01370g	ident	22.9	14.175	29.413	2	2	1
Cellular Component	GO:0019866	9	organelle inner membrane	3.66924e-10	U5GS58	Mitochondrial carnitine/acylcarnitine carrier-like family protein	POPTR_0001s02500g	ident	15.5	30.343	24.822	4	4	4
Cellular Component	GO:0019866	9	organelle inner membrane	3.66924e-10	A9PBU4	Uncharacterized protein	POPTR_0006s24810g	ident	11.5	14.045	11.01	3	2	0
Cellular Component	GO:0019866	9	organelle inner membrane	3.66924e-10	B9HEW3	Succinate dehydrogenase [ubiquinone] flavoprotein subunit, mitochondrial	POPTR_0007s12750g	ident	27.2	69.859	198.88	11	11	6
Cellular Component	GO:0019866	9	organelle inner membrane	3.66924e-10	B9HFT3	Cytochrome c oxidase subunit 6a, mitochondrial OS=Arabidopsis thaliana GN=COX6A PE=2 SV=1	POPTR_0007s14540g	ident	13.7	14.218	6.2338	1	1	1
Cellular Component	GO:0019866	9	organelle inner membrane	3.66924e-10	A4GYX4	Protein TIC 214	TIC214	ident	3.2	218.33	23.108	4	4	4
Cellular Component	GO:0019866	9	organelle inner membrane	3.66924e-10	B9H7R3	Cytochrome b-c1 complex subunit 6	POPTR_0005s21330g	ident	21.7	7.9962	9.8322	1	1	1
Cellular Component	GO:0019866	9	organelle inner membrane	3.66924e-10	U5FES1	NADH dehydrogenase [ubiquinone] 1 alpha subcomplex subunit 12	POPTR_0019s07820g	ident	22.9	21.025	28.272	4	3	3
Cellular Component	GO:0019866	9	organelle inner membrane	3.66924e-10	B9HIF7	Ubiquinone biosynthesis protein COQ4 homolog, mitochondrial	POPTR_0008s09670g	ident	8.3	25.9	9.7224	1	1	1
Cellular Component	GO:0019866	9	organelle inner membrane	3.66924e-10	A0A2K1WWB4	Uncharacterized protein	POPTR_018G055600v3	ident	8	9.9045	5.6288	2	1	1
Cellular Component	GO:0019866	9	organelle inner membrane	3.66924e-10	B9GIY4	Succinate dehydrogenase [ubiquinone] iron-sulfur subunit, mitochondrial	POPTR_0001s36050g	ident	19.3	32.125	40.364	5	4	4
Cellular Component	GO:0019866	9	organelle inner membrane	3.66924e-10	B9HWA2	ATP synthase subunit beta	POPTR_0010s12680g	ident	46.2	59.81	323.31	54	19	18
Cellular Component	GO:0019866	9	organelle inner membrane	3.66924e-10	B9H3E2	NADH dehydrogenase [ubiquinone] iron-sulfur protein 1, mitochondrial OS=Solanum tuberosum PE=2 SV=1	POPTR_0004s08110g	ident	19.8	79.963	87.934	15	12	6
Cellular Component	GO:0019866	9	organelle inner membrane	3.66924e-10	A9PDH8	mRNA for epsilon subunit of mitochondrial F1-ATPase family protein	POPTR_0010s25640g	ident	31.4	7.7528	13.092	3	2	2
Cellular Component	GO:0019866	9	organelle inner membrane	3.66924e-10	B9HRF5	Complex 1 family protein	POPTR_0009s12750g	ident	20.7	13.615	18.085	3	2	2
Cellular Component	GO:0019866	9	organelle inner membrane	3.66924e-10	B9HU25	ATP synthase subunit d, mitochondrial	POPTR_0010s22480g	ident	16.1	19.659	27.314	5	3	2
Cellular Component	GO:0019866	9	organelle inner membrane	3.66924e-10	A0A2K1YEM0	Mitochondrial pyruvate carrier	POPTR_011G023100v3	ident	50.9	6.4484	13.059	2	2	2
Cellular Component	GO:0019866	9	organelle inner membrane	3.66924e-10	B9I3N6	Mitochondrial pyruvate carrier (Fragment)	POPTR_0012s09690g	ident	6	18.633	10.938	2	1	1
Cellular Component	GO:0019866	9	organelle inner membrane	3.66924e-10	B9IG89	Mitochondrial substrate carrier family protein	POPTR_0016s12280g	ident	3.1	42.847	5.9953	1	1	1
Cellular Component	GO:0019866	9	organelle inner membrane	3.66924e-10	B9N332	Mitochondrial import inner membrane translocase subunit Tim17 family protein	POPTR_0006s17850g	ident	4.1	22.836	5.9569	1	1	1
Cellular Component	GO:0019866	9	organelle inner membrane	3.66924e-10	B9IK63	Mitochondrial processing peptidase beta subunit family protein	POPTR_0017s12800g	ident	25.6	58.604	38.02	5	10	5
Cellular Component	GO:0031968	9	organelle outer membrane	0.00185889	A0A2K1XZU4	Mitochondrial Rho GTPase	POPTR_013G023100v3	ident	13.3	71.15	64.166	7	6	1
Cellular Component	GO:0031968	9	organelle outer membrane	0.00185889	B9GJU0	Mitochondrial import receptor subunit TOM20 OS=Solanum tuberosum GN=TOM20 PE=1 SV=1	POPTR_0001s33780g	ident	20.4	22.754	39.987	4	3	3
Cellular Component	GO:0031968	9	organelle outer membrane	0.00185889	A0A2K2AGV8	Mitochondrial outer membrane protein porin 2 OS=Arabidopsis thaliana GN=VDAC2 PE=1 SV=1	POPTR_005G146800v3	ident	17.4	29.349	41.461	8	6	3
Cellular Component	GO:0031968	9	organelle outer membrane	0.00185889	A0A2K2BSV1	Mitochondrial import receptor subunit TOM20 OS=Solanum tuberosum GN=TOM20 PE=1 SV=1	POPTR_001G054900v3	ident	16.5	18.937	25.085	2	2	2
Cellular Component	GO:0031968	9	organelle outer membrane	0.00185889	B9GRT9	Translocase of chloroplast	POPTR_0002s18420g	ident	8.8	33.116	11.682	3	2	2
Cellular Component	GO:0031968	9	organelle outer membrane	0.00185889	B9IBR6	Mitochondrial outer membrane protein porin 2 OS=Arabidopsis thaliana GN=VDAC2 PE=1 SV=1	POPTR_0014s01660g	ident	6.2	29.322	11.622	2	2	2
Cellular Component	GO:0031968	9	organelle outer membrane	0.00185889	U5GQU7	Uncharacterized protein	POPTR_0003s14620g	ident	3	56.375	8.2706	1	1	1
Cellular Component	GO:0031968	9	organelle outer membrane	0.00185889	B9IM03	VDAC3.1 family protein	POPTR_0018s10180g	ident	9.8	29.534	16.668	2	2	2
Cellular Component	GO:0031968	9	organelle outer membrane	0.00185889	U5G7Y6	VDAC2.1 family protein	POPTR_0007s09780g	ident	18.5	29.397	17.524	3	6	3
Cellular Component	GO:0031968	9	organelle outer membrane	0.00185889	A9PCP8	Mitochondrial outer membrane protein porin of 34 kDa OS=Solanum tuberosum PE=1 SV=2	POPTR_0017s11430g	ident	28.1	29.125	88.719	9	7	7
Cellular Component	GO:0031968	9	organelle outer membrane	0.00185889	B9GRD7	Mitochondrial import receptor subunit TOM22 family protein	POPTR_0002s25900g	ident	8.3	11.601	6.4958	1	1	1
Cellular Component	GO:0031968	9	organelle outer membrane	0.00185889	A9P802	Porin family protein	POPTR_0010s04240g	ident	18.5	29.499	58.587	8	7	6
Cellular Component	GO:0031968	9	organelle outer membrane	0.00185889	A9PD04	Porin family protein	POPTR_0008s19940g	ident	27.2	29.608	51.567	6	5	4
Cellular Component	GO:0071004	12	U2-type prespliceosome	0.319877	B9GGC4	Splicing factor 3B subunit 1 OS=Xenopus laevis GN=sf3b1 PE=2 SV=1	POPTR_0001s31840g	ident	4.5	125.99	30.211	5	5	5
Cellular Component	GO:0071004	12	U2-type prespliceosome	0.319877	B9HEV8	U1 small nuclear ribonucleoprotein 70 kDa OS=Arabidopsis thaliana GN=RNU1 PE=1 SV=1	POPTR_0007s12690g	ident	2	59.244	5.9436	1	1	1
Cellular Component	GO:0071004	12	U2-type prespliceosome	0.319877	B9HEU4	U2 snRNP auxiliary factor large subunit	POPTR_0007s12550g	ident	7.8	60.957	7.2111	1	3	1
Cellular Component	GO:1990351	3	transporter complex	0.00430268	A0A2K2A7Y7	Cytochrome b-c1 complex subunit 7	POPTR_006G250000v3	ident	27	14.706	22.932	3	3	2
Cellular Component	GO:1990351	3	transporter complex	0.00430268	B9H7R3	Cytochrome b-c1 complex subunit 6	POPTR_0005s21330g	ident	21.7	7.9962	9.8322	1	1	1
Cellular Component	GO:1990351	3	transporter complex	0.00430268	B9GJ66	Mitochondrial import inner membrane translocase subunit Tim13 family protein	POPTR_0001s45640g	ident	50.6	9.6928	15.489	2	3	2
Cellular Component	GO:1990351	3	transporter complex	0.00430268	B9IK63	Mitochondrial processing peptidase beta subunit family protein	POPTR_0017s12800g	ident	25.6	58.604	38.02	5	10	5
Cellular Component	GO:1990351	3	transporter complex	0.00430268	A0A2K1R5Q9	Protein TRIGALACTOSYLDIACYLGLYCEROL 1, chloroplastic OS=Arabidopsis thaliana GN=TGD1 PE=1 SV=1	POPTR_T131800v3	ident	6.9	22.111	8.284	2	1	1
Cellular Component	GO:1990351	3	transporter complex	0.00430268	B9IKU0	Cytochrome b-c1 complex subunit 7	POPTR_0018s01370g	ident	22.9	14.175	29.413	2	2	1
Cellular Component	GO:1990351	3	transporter complex	0.00430268	A9P8U9	Mitochondrial import inner membrane translocase subunit Tim13 family protein	POPTR_0011s15280g	ident	58.4	9.7298	71.548	5	4	3
Cellular Component	GO:0098799	13	outer mitochondrial membrane protein complex	0.0357723	B9GRD7	Mitochondrial import receptor subunit TOM22 family protein	POPTR_0002s25900g	ident	8.3	11.601	6.4958	1	1	1
Cellular Component	GO:0098799	13	outer mitochondrial membrane protein complex	0.0357723	B9GJU0	Mitochondrial import receptor subunit TOM20 OS=Solanum tuberosum GN=TOM20 PE=1 SV=1	POPTR_0001s33780g	ident	20.4	22.754	39.987	4	3	3
Cellular Component	GO:0098799	13	outer mitochondrial membrane protein complex	0.0357723	A0A2K2BSV1	Mitochondrial import receptor subunit TOM20 OS=Solanum tuberosum GN=TOM20 PE=1 SV=1	POPTR_001G054900v3	ident	16.5	18.937	25.085	2	2	2
Cellular Component	GO:0098799	13	outer mitochondrial membrane protein complex	0.0357723	U5GQU7	Uncharacterized protein	POPTR_0003s14620g	ident	3	56.375	8.2706	1	1	1
Cellular Component	GO:0005751	14	mitochondrial respiratory chain complex IV	0.011805	B9GWN0	Cytochrome c oxidase family protein	POPTR_0003s05880g	ident	13.5	17.946	14.044	2	2	2
Cellular Component	GO:0005751	14	mitochondrial respiratory chain complex IV	0.011805	B9HFT3	Cytochrome c oxidase subunit 6a, mitochondrial OS=Arabidopsis thaliana GN=COX6A PE=2 SV=1	POPTR_0007s14540g	ident	13.7	14.218	6.2338	1	1	1
Cellular Component	GO:0098588	5	bounding membrane of organelle	1.05343e-05	A0A2K1Z6C5	Coatomer subunit gamma	POPTR_009G115100v3	ident	14.5	90.668	24.689	3	8	3
Cellular Component	GO:0098588	5	bounding membrane of organelle	1.05343e-05	B9HQP3	Nodulin-26 family protein	POPTR_0009s01070g	ident	9.4	26.682	15.861	3	2	2
Cellular Component	GO:0098588	5	bounding membrane of organelle	1.05343e-05	B9IBX3	Golgi SNAP receptor complex member 1	POPTR_0014s06230g	ident	8.6	26.972	5.8996	1	2	1
Cellular Component	GO:0098588	5	bounding membrane of organelle	1.05343e-05	B9HQ95	Protein disulfide-isomerase	POPTR_0009s01920g	ident	13.7	65.193	50.17	11	8	8
Cellular Component	GO:0098588	5	bounding membrane of organelle	1.05343e-05	A9PGG9	V-type proton ATPase subunit G OS=Citrus limon GN=VATG PE=3 SV=1	POPTR_008G040300v3	ident	13.9	8.9681	7.8042	2	1	1
Cellular Component	GO:0098588	5	bounding membrane of organelle	1.05343e-05	B9GRC2	ABC transporter family protein	POPTR_0002s25710g	ident	2.9	117.57	17.917	3	3	3
Cellular Component	GO:0098588	5	bounding membrane of organelle	1.05343e-05	B9MVD9	Peroxisomal biogenesis factor 11 family protein	POPTR_0014s04160g	ident	3.5	28.554	7.2613	1	1	1
Cellular Component	GO:0098588	5	bounding membrane of organelle	1.05343e-05	B9I6P4	Golgi apparatus membrane protein TVP23	POPTR_0013s00770g	ident	7.7	20.866	10.245	1	1	1
Cellular Component	GO:0098588	5	bounding membrane of organelle	1.05343e-05	A0A2K1ZC12	Protein transport protein Sec24-like At3g07100 OS=Arabidopsis thaliana GN=At3g07100 PE=2 SV=2	POPTR_008G049700v3	ident	7.8	106.64	47.634	6	7	7
Cellular Component	GO:0098588	5	bounding membrane of organelle	1.05343e-05	U5FV61	Clathrin light chain	POPTR_0011s04920g	ident	6.2	35.419	41.527	3	3	3
Cellular Component	GO:0098588	5	bounding membrane of organelle	1.05343e-05	A0A2K1XZU4	Mitochondrial Rho GTPase	POPTR_013G023100v3	ident	13.3	71.15	64.166	7	6	1
Cellular Component	GO:0098588	5	bounding membrane of organelle	1.05343e-05	U5FNF7	V-type proton ATPase subunit C	POPTR_0017s08810g	ident	26.1	42.62	52.226	9	8	3
Cellular Component	GO:0098588	5	bounding membrane of organelle	1.05343e-05	B9GTA0	Transport family protein	POPTR_0002s18820g	ident	3	95.046	15.052	2	2	2
Cellular Component	GO:0098588	5	bounding membrane of organelle	1.05343e-05	B9MYW1	Sec23/sec24 transport family protein	POPTR_0004s21200g	ident	7	82.593	34.332	4	4	4
Cellular Component	GO:0098588	5	bounding membrane of organelle	1.05343e-05	A9P9H7	Vesicle transport v-SNARE 13 OS=Arabidopsis thaliana GN=VTI13 PE=2 SV=1	POPTR_0017s12360g	ident	22.7	24.862	33.854	6	3	2
Cellular Component	GO:0098588	5	bounding membrane of organelle	1.05343e-05	A9PEC2	GTP-binding family protein	POPTR_0003s07970g	ident	40.9	22.692	55.581	7	5	4
Cellular Component	GO:0098588	5	bounding membrane of organelle	1.05343e-05	B9N680	Coatomer subunit beta	POPTR_0006s28810g	ident	16.2	105.57	86.794	14	11	8
Cellular Component	GO:0098588	5	bounding membrane of organelle	1.05343e-05	B9ILF4	Coatomer subunit beta	POPTR_0018s03560g	ident	8.2	105.98	33.295	4	6	3
Cellular Component	GO:0098588	5	bounding membrane of organelle	1.05343e-05	B9GJU0	Mitochondrial import receptor subunit TOM20 OS=Solanum tuberosum GN=TOM20 PE=1 SV=1	POPTR_0001s33780g	ident	20.4	22.754	39.987	4	3	3
Cellular Component	GO:0098588	5	bounding membrane of organelle	1.05343e-05	B9GI50	Monodehydroascorbate reductase family protein	POPTR_0001s35220g	ident	2.1	52.189	9.6756	1	1	1
Cellular Component	GO:0098588	5	bounding membrane of organelle	1.05343e-05	B9HHJ9	Uncharacterized protein	POPTR_0008s06350g	ident	14.3	8.6092	6.7666	1	1	1
Cellular Component	GO:0098588	5	bounding membrane of organelle	1.05343e-05	B9GNG2	Alpha-mannosidase	POPTR_0002s23920g	ident	6	114.84	37.377	5	5	4
Cellular Component	GO:0098588	5	bounding membrane of organelle	1.05343e-05	A0A2K2BCI4	V-type proton ATPase subunit a	POPTR_002G028600v3	ident	1.5	83.802	6.2823	0	1	1
Cellular Component	GO:0098588	5	bounding membrane of organelle	1.05343e-05	U5GAZ5	Syntaxin-32 OS=Arabidopsis thaliana GN=SYP32 PE=2 SV=1	POPTR_0006s160901g	ident	10.4	24.121	40.487	1	1	1
Cellular Component	GO:0098588	5	bounding membrane of organelle	1.05343e-05	B9N0S6	Beta-galactosidase	POPTR_0017s08470g	ident	17.2	99.877	94.094	16	12	12
Cellular Component	GO:0098588	5	bounding membrane of organelle	1.05343e-05	A9PA39	Annexin	POPTR_0002s09610g	ident	23.4	35.967	73.177	9	7	7
Cellular Component	GO:0098588	5	bounding membrane of organelle	1.05343e-05	B9I742	V-type proton ATPase subunit H OS=Arabidopsis thaliana GN=VHA-H PE=1 SV=1	POPTR_0013s07630g	ident	5	45.436	12.444	2	2	2
Cellular Component	GO:0098588	5	bounding membrane of organelle	1.05343e-05	B9N2K4	Transport family protein	POPTR_0019s01710g	ident	15.2	85.951	71.556	9	8	3
Cellular Component	GO:0098588	5	bounding membrane of organelle	1.05343e-05	A9P9I3	Gamma-tonoplast intrinsic protein 2	POPTR_0006s12350g	ident	6.7	26.043	38.627	3	1	1
Cellular Component	GO:0098588	5	bounding membrane of organelle	1.05343e-05	A0A2K1Z4A0	Clathrin heavy chain	POPTR_009G073300v3	ident	21	188.35	322.83	52	32	8
Cellular Component	GO:0098588	5	bounding membrane of organelle	1.05343e-05	U5FHM4	Protein YIF1B-A OS=Xenopus laevis GN=yif1b-a PE=2 SV=1	POPTR_0017s05720g	ident	5.6	30.06	14.871	1	1	1
Cellular Component	GO:0098588	5	bounding membrane of organelle	1.05343e-05	A9PA83	Histone H4	POPTR_0005s11740g	ident	33	11.409	37.629	10	5	3
Cellular Component	GO:0098588	5	bounding membrane of organelle	1.05343e-05	A0A2K2AGV8	Mitochondrial outer membrane protein porin 2 OS=Arabidopsis thaliana GN=VDAC2 PE=1 SV=1	POPTR_005G146800v3	ident	17.4	29.349	41.461	8	6	3
Cellular Component	GO:0098588	5	bounding membrane of organelle	1.05343e-05	B9IEK6	Coatomer subunit alpha	POPTR_0015s08110g	ident	26.8	136.52	271.21	34	26	8
Cellular Component	GO:0098588	5	bounding membrane of organelle	1.05343e-05	B9I345	Coatomer subunit alpha	POPTR_0012s07650g	ident	22.5	136.9	24.152	3	22	4
Cellular Component	GO:0098588	5	bounding membrane of organelle	1.05343e-05	A9PF90	Protein transport protein Sec61 subunit beta	POPTR_0014s05810g	ident	23.2	8.3487	15.276	3	2	2
Cellular Component	GO:0098588	5	bounding membrane of organelle	1.05343e-05	A0A2K2C4W2	Clathrin heavy chain	POPTR_001G278800v3	ident	23	167.31	99.658	8	31	6
Cellular Component	GO:0098588	5	bounding membrane of organelle	1.05343e-05	B9GGU0	Transport family protein	POPTR_0001s31490g	ident	11.4	85.897	11.226	1	6	1
Cellular Component	GO:0098588	5	bounding membrane of organelle	1.05343e-05	B9N9I7	Aquaporin TIP-type alpha family protein	POPTR_0017s03540g	ident	2.7	27.407	5.6229	1	1	1
Cellular Component	GO:0098588	5	bounding membrane of organelle	1.05343e-05	A0A2K1Z6Q8	V-type proton ATPase subunit a	POPTR_009G121400v3	ident	5.9	93.052	38.483	4	4	4
Cellular Component	GO:0098588	5	bounding membrane of organelle	1.05343e-05	B9GIJ5	Vesicle tethering family protein	POPTR_0001s35520g	ident	12.7	101.22	65.244	8	8	8
Cellular Component	GO:0098588	5	bounding membrane of organelle	1.05343e-05	A0A2K2BSV1	Mitochondrial import receptor subunit TOM20 OS=Solanum tuberosum GN=TOM20 PE=1 SV=1	POPTR_001G054900v3	ident	16.5	18.937	25.085	2	2	2
Cellular Component	GO:0098588	5	bounding membrane of organelle	1.05343e-05	U5GQU7	Uncharacterized protein	POPTR_0003s14620g	ident	3	56.375	8.2706	1	1	1
Cellular Component	GO:0098588	5	bounding membrane of organelle	1.05343e-05	B9GRD7	Mitochondrial import receptor subunit TOM22 family protein	POPTR_0002s25900g	ident	8.3	11.601	6.4958	1	1	1
Cellular Component	GO:0098588	5	bounding membrane of organelle	1.05343e-05	A9PD04	Porin family protein	POPTR_0008s19940g	ident	27.2	29.608	51.567	6	5	4
Cellular Component	GO:0098588	5	bounding membrane of organelle	1.05343e-05	B9N466	Golgi apparatus membrane protein TVP23	POPTR_0005s01380g	ident	7.7	20.785	14.243	1	2	2
Cellular Component	GO:0098588	5	bounding membrane of organelle	1.05343e-05	A0A2K2AVG2	V-type proton ATPase subunit a	POPTR_004G160400v3	ident	3.5	90.165	12.483	2	2	2
Cellular Component	GO:0098588	5	bounding membrane of organelle	1.05343e-05	U5G7Y6	VDAC2.1 family protein	POPTR_0007s09780g	ident	18.5	29.397	17.524	3	6	3
Cellular Component	GO:0098588	5	bounding membrane of organelle	1.05343e-05	B9HSM0	Clathrin heavy chain	POPTR_0010s19420g	ident	14.8	193.36	7.0998	2	24	1
Cellular Component	GO:0098588	5	bounding membrane of organelle	1.05343e-05	U5GVA8	Alpha-mannosidase	POPTR_0001s34770g	ident	8.8	97.697	53.917	6	6	6
Cellular Component	GO:0098588	5	bounding membrane of organelle	1.05343e-05	B9GWZ6	Coatomer subunit beta'	POPTR_0003s05500g	ident	10.5	104.14	7.1645	2	9	1
Cellular Component	GO:0098588	5	bounding membrane of organelle	1.05343e-05	B9ICR4	Coatomer subunit delta	POPTR_0015s14960g	ident	5.9	58.317	6.7489	1	3	1
Cellular Component	GO:0098588	5	bounding membrane of organelle	1.05343e-05	B9HV14	Vacuolar ATP synthase catalytic subunit A family protein	POPTR_0010s26000g	ident	34.3	68.7	159.5	26	17	3
Cellular Component	GO:0098588	5	bounding membrane of organelle	1.05343e-05	B9I7S1	Protein AUXIN RESPONSE 4 OS=Arabidopsis thaliana GN=AXR4 PE=2 SV=1	POPTR_0013s02240g	ident	6.4	48.394	11.769	2	2	2
Cellular Component	GO:0098588	5	bounding membrane of organelle	1.05343e-05	B9I0V9	Coatomer subunit epsilon	POPTR_0011s15930g	ident	17.2	32.178	35.563	5	4	4
Cellular Component	GO:0098588	5	bounding membrane of organelle	1.05343e-05	A9PD21	Vacuolar ATP synthase family protein	POPTR_0006s26480g	ident	5.7	17.931	9.7892	1	1	1
Cellular Component	GO:0098588	5	bounding membrane of organelle	1.05343e-05	B9GYB6	Protein transport protein sec16	POPTR_0003s07480g	ident	1	147.86	8.5882	1	1	1
Cellular Component	GO:0098588	5	bounding membrane of organelle	1.05343e-05	B9HK35	Vacuolar ATP synthase catalytic subunit A family protein	POPTR_0008s00560g	ident	33.2	68.619	23.896	4	16	2
Cellular Component	GO:0098588	5	bounding membrane of organelle	1.05343e-05	A9P8R8	Protein transport protein Sec61 subunit beta	POPTR_0009s01720g	ident	23.6	10.579	6.6138	1	1	1
Cellular Component	GO:0098588	5	bounding membrane of organelle	1.05343e-05	B9GEP6	Strictosidine synthase family protein	POPTR_0001s22160g	ident	11	44.042	37.969	3	3	3
Cellular Component	GO:0098588	5	bounding membrane of organelle	1.05343e-05	B9GPD6	Golgi SNAP receptor complex member 1	POPTR_0002s14610g	ident	8.8	26.833	13.74	2	2	1
Cellular Component	GO:0098588	5	bounding membrane of organelle	1.05343e-05	B9GRT9	Translocase of chloroplast	POPTR_0002s18420g	ident	8.8	33.116	11.682	3	2	2
Cellular Component	GO:0098588	5	bounding membrane of organelle	1.05343e-05	B9IBR6	Mitochondrial outer membrane protein porin 2 OS=Arabidopsis thaliana GN=VDAC2 PE=1 SV=1	POPTR_0014s01660g	ident	6.2	29.322	11.622	2	2	2
Cellular Component	GO:0098588	5	bounding membrane of organelle	1.05343e-05	A0A2K1ZD81	Clathrin heavy chain	POPTR_008G070600v3	ident	14	193.48	23.321	3	24	0
Cellular Component	GO:0098588	5	bounding membrane of organelle	1.05343e-05	B9IM03	VDAC3.1 family protein	POPTR_0018s10180g	ident	9.8	29.534	16.668	2	2	2
Cellular Component	GO:0098588	5	bounding membrane of organelle	1.05343e-05	A9PCP8	Mitochondrial outer membrane protein porin of 34 kDa OS=Solanum tuberosum PE=1 SV=2	POPTR_0017s11430g	ident	28.1	29.125	88.719	9	7	7
Cellular Component	GO:0098588	5	bounding membrane of organelle	1.05343e-05	B9GZT3	Potassium transporter	POPTR_0003s01820g	ident	2	95.355	5.9448	1	1	1
Cellular Component	GO:0098588	5	bounding membrane of organelle	1.05343e-05	A9P802	Porin family protein	POPTR_0010s04240g	ident	18.5	29.499	58.587	8	7	6
Cellular Component	GO:0098588	5	bounding membrane of organelle	1.05343e-05	A0A2K1Y0H6	Protein transport protein Sec24-like At4g32640 OS=Arabidopsis thaliana GN=At4g32640 PE=2 SV=3	POPTR_013G035800v3	ident	5.1	101.8	22.141	5	3	3
Cellular Component	GO:0098588	5	bounding membrane of organelle	1.05343e-05	B9H0P9	Coatomer subunit gamma	POPTR_0004s16090g	ident	14.6	98.519	85.64	8	9	4
Cellular Component	GO:0043232	7	intracellular non-membrane-bounded organelle	5.1742e-15	A9PBI3	Ribosomal protein L7Ae/L30e/S12e/Gadd45	POPTR_0013s12110g	ident	17.2	13.9	11.635	1	1	1
Cellular Component	GO:0043232	7	intracellular non-membrane-bounded organelle	5.1742e-15	A9PC09	Nucleolar RNA-binding Nop10p family protein	POPTR_0002s03780g	ident	23.4	7.4765	6.6722	1	1	1
Cellular Component	GO:0043232	7	intracellular non-membrane-bounded organelle	5.1742e-15	A9PCW9	60S ribosomal protein L17-1	POPTR_0012s09860g	ident	16	20.406	6.8295	2	2	1
Cellular Component	GO:0043232	7	intracellular non-membrane-bounded organelle	5.1742e-15	B9GQP4	60S ribosomal protein L32-1 OS=Arabidopsis thaliana GN=RPL32A PE=2 SV=2	POPTR_0002s25050g	ident	30.8	15.586	8.8741	3	3	1
Cellular Component	GO:0043232	7	intracellular non-membrane-bounded organelle	5.1742e-15	A0A2K1YZS2	DNA gyrase subunit A, chloroplastic/mitochondrial OS=Nicotiana benthamiana GN=GYRA PE=2 SV=1	POPTR_010G247000v3	ident	6	97.958	31.981	4	4	4
Cellular Component	GO:0043232	7	intracellular non-membrane-bounded organelle	5.1742e-15	B9ILZ3	Histone H4	POPTR_0018s10050g	ident	32.6	10.209	5.891	1	3	1
Cellular Component	GO:0043232	7	intracellular non-membrane-bounded organelle	5.1742e-15	A0A2K2BTN7	60S ribosomal protein L21-1 OS=Arabidopsis thaliana GN=RPL21A PE=2 SV=2	POPTR_001G071100v3	ident	13.8	15.017	6.6041	1	2	1
Cellular Component	GO:0043232	7	intracellular non-membrane-bounded organelle	5.1742e-15	B9GPZ0	DEAD/DEAH box helicase family protein	POPTR_0002s15890g	ident	13.2	57.242	52.623	5	5	5
Cellular Component	GO:0043232	7	intracellular non-membrane-bounded organelle	5.1742e-15	B9IIV1	60S ribosomal protein L23a OS=Daucus carota GN=RPL23A PE=2 SV=1	POPTR_0016s08070g	ident	21.9	17.267	40.872	7	6	6
Cellular Component	GO:0043232	7	intracellular non-membrane-bounded organelle	5.1742e-15	B9H7W2	40S ribosomal protein S18	POPTR_0005s21860g	ident	27.6	17.581	12.255	1	4	1
Cellular Component	GO:0043232	7	intracellular non-membrane-bounded organelle	5.1742e-15	A9P8E8	40S ribosomal protein S18 OS=Arabidopsis thaliana GN=RPS18A PE=1 SV=1	POPTR_0002s05220g	ident	40.8	17.635	10.147	1	6	1
Cellular Component	GO:0043232	7	intracellular non-membrane-bounded organelle	5.1742e-15	B9HJ33	50S ribosomal protein L15, chloroplastic (Fragment) OS=Pisum sativum GN=RPL15 PE=2 SV=1	POPTR_0008s12000g	ident	23.6	27.204	52.726	8	6	6
Cellular Component	GO:0043232	7	intracellular non-membrane-bounded organelle	5.1742e-15	B9IPR1	Tubulin alpha chain	POPTR_0019s05160g	ident	22	49.594	-2	1	8	0
Cellular Component	GO:0043232	7	intracellular non-membrane-bounded organelle	5.1742e-15	B9I1A1	30S ribosomal protein S10	POPTR_0011s09530g	ident	4.9	22.722	6.142	1	1	1
Cellular Component	GO:0043232	7	intracellular non-membrane-bounded organelle	5.1742e-15	A0A2K2AXF7	Ribosomal protein	POPTR_004G202800v3	ident	27.7	18.789	45.866	11	5	2
Cellular Component	GO:0043232	7	intracellular non-membrane-bounded organelle	5.1742e-15	A9PDL5	60S ribosomal protein L38 OS=Arabidopsis thaliana GN=RPL38A PE=3 SV=1	POPTR_0007s01660g	ident	53.6	8.0244	39.685	6	4	1
Cellular Component	GO:0043232	7	intracellular non-membrane-bounded organelle	5.1742e-15	A9P8K6	40S ribosomal protein S11	POPTR_0014s05220g	ident	14.5	17.917	10.771	2	2	1
Cellular Component	GO:0043232	7	intracellular non-membrane-bounded organelle	5.1742e-15	A9PI77	Ribosomal protein	POPTR_0007s11960g	ident	21.3	24.385	17.749	5	5	2
Cellular Component	GO:0043232	7	intracellular non-membrane-bounded organelle	5.1742e-15	B9HSR0	60S acidic ribosomal protein P0	POPTR_0010s19860g	ident	21.9	34.096	44.171	8	5	5
Cellular Component	GO:0043232	7	intracellular non-membrane-bounded organelle	5.1742e-15	A9PBS4	Ribosomal protein L19	POPTR_0001s15230g	ident	4.1	27.025	6.6816	2	1	1
Cellular Component	GO:0043232	7	intracellular non-membrane-bounded organelle	5.1742e-15	B9III1	50S ribosomal protein L22 OS=Sinorhizobium medicae (strain WSM419) GN=rplV PE=3 SV=1	POPTR_0016s06740g	ident	3.6	31.171	6.0571	1	1	1
Cellular Component	GO:0043232	7	intracellular non-membrane-bounded organelle	5.1742e-15	A4GYT5	30S ribosomal protein S12-A, chloroplastic	rps12-A	ident	17.1	13.639	12.843	2	2	2
Cellular Component	GO:0043232	7	intracellular non-membrane-bounded organelle	5.1742e-15	B9MUD1	60S ribosomal protein L13	POPTR_0001s01350g	ident	27.1	23.812	133.05	8	5	2
Cellular Component	GO:0043232	7	intracellular non-membrane-bounded organelle	5.1742e-15	A4GYU8	50S ribosomal protein L16, chloroplastic	rpl16	ident	42.2	15.413	36.466	7	4	2
Cellular Component	GO:0043232	7	intracellular non-membrane-bounded organelle	5.1742e-15	B9GJV7	Fimbrin-1 OS=Arabidopsis thaliana GN=FIM1 PE=1 SV=2	POPTR_0001s37110g	ident	1.7	76.915	7.1838	1	1	1
Cellular Component	GO:0043232	7	intracellular non-membrane-bounded organelle	5.1742e-15	A0A2K1YXW6	60S ribosomal protein L35 OS=Euphorbia esula GN=RPL35 PE=2 SV=1	POPTR_010G212300v3	ident	9.7	11.87	12.316	2	2	1
Cellular Component	GO:0043232	7	intracellular non-membrane-bounded organelle	5.1742e-15	A9PC19	40S ribosomal protein S15a OS=Daucus carota GN=RPS15A PE=2 SV=3	POPTR_0008s05190g	ident	44.6	14.854	38.398	5	5	5
Cellular Component	GO:0043232	7	intracellular non-membrane-bounded organelle	5.1742e-15	A9P978	60S ribosomal protein L38	POPTR_0010s18850g	ident	53.6	8.0765	6.7098	1	4	1
Cellular Component	GO:0043232	7	intracellular non-membrane-bounded organelle	5.1742e-15	A0A2K1XL83	60S ribosomal protein L34 OS=Nicotiana tabacum GN=RPL34 PE=2 SV=1	POPTR_015G106500v3	ident	24.5	11.801	12.888	3	2	2
Cellular Component	GO:0043232	7	intracellular non-membrane-bounded organelle	5.1742e-15	B9H7A3	30S ribosomal protein S13, chloroplastic OS=Arabidopsis thaliana GN=RPS13 PE=2 SV=1	POPTR_0005s16160g	ident	23.8	18.745	39.201	8	5	5
Cellular Component	GO:0043232	7	intracellular non-membrane-bounded organelle	5.1742e-15	U5G8Z4	DNA topoisomerase 1 OS=Rickettsia felis (strain ATCC VR-1525 / URRWXCal2) GN=topA PE=3 SV=1	POPTR_0006s29400g	ident	4.6	124.25	30.917	6	5	5
Cellular Component	GO:0043232	7	intracellular non-membrane-bounded organelle	5.1742e-15	A0A2K1ZIR2	60S ribosomal protein L23 OS=Arabidopsis thaliana GN=RPL23A PE=2 SV=3	POPTR_008G171200v3	ident	49.6	13.424	81.631	10	5	5
Cellular Component	GO:0043232	7	intracellular non-membrane-bounded organelle	5.1742e-15	A0A2K2BZR0	Ribosomal protein L37	POPTR_001G183200v3	ident	12.2	9.5681	7.9058	1	1	1
Cellular Component	GO:0043232	7	intracellular non-membrane-bounded organelle	5.1742e-15	A0A2K2BH83	Tubulin alpha chain	POPTR_002G111900v3	ident	42.3	45.771	16.056	1	13	1
Cellular Component	GO:0043232	7	intracellular non-membrane-bounded organelle	5.1742e-15	B9GK36	Oleosin 18.5 kDa family protein	POPTR_0001s11760g	ident	10.4	14.084	61.416	5	1	1
Cellular Component	GO:0043232	7	intracellular non-membrane-bounded organelle	5.1742e-15	B9GGV7	UBP1-associated protein 2C OS=Arabidopsis thaliana GN=UBA2C PE=2 SV=1	POPTR_0001s38640g	ident	10.9	39.549	40.407	4	4	4
Cellular Component	GO:0043232	7	intracellular non-membrane-bounded organelle	5.1742e-15	B9IGG6	40S ribosomal protein S4	POPTR_0016s13210g	ident	37.6	29.719	136.95	17	9	3
Cellular Component	GO:0043232	7	intracellular non-membrane-bounded organelle	5.1742e-15	B9GWH0	Actin-depolymerizing factor family protein	POPTR_0003s12550g	ident	5	15.96	5.6537	2	1	1
Cellular Component	GO:0043232	7	intracellular non-membrane-bounded organelle	5.1742e-15	U5FR48	Flap endonuclease 1	FEN1	ident	3.4	46.335	8.671	1	1	1
Cellular Component	GO:0043232	7	intracellular non-membrane-bounded organelle	5.1742e-15	B9HD67	60S ribosomal protein L27	POPTR_0006s02230g	ident	8.1	15.699	7.0164	2	1	1
Cellular Component	GO:0043232	7	intracellular non-membrane-bounded organelle	5.1742e-15	A9PBL6	40S ribosomal protein S24	POPTR_0030s00470g	ident	26.9	15.398	56.916	6	4	2
Cellular Component	GO:0043232	7	intracellular non-membrane-bounded organelle	5.1742e-15	B9I7J5	Histone H2A	POPTR_0013s01890g	ident	11	15.349	11.584	2	2	1
Cellular Component	GO:0043232	7	intracellular non-membrane-bounded organelle	5.1742e-15	A9PCX2	60S ribosomal protein L21	POPTR_0003s15780g	ident	11	18.753	5.6473	1	2	0
Cellular Component	GO:0043232	7	intracellular non-membrane-bounded organelle	5.1742e-15	A9PBW0	60S ribosomal protein L12	POPTR_0018s14210g	ident	33.9	17.645	37.731	8	4	4
Cellular Component	GO:0043232	7	intracellular non-membrane-bounded organelle	5.1742e-15	B9IG32	Fructokinase-like 1, chloroplastic OS=Arabidopsis thaliana GN=FLN1 PE=1 SV=1	POPTR_0016s11690g	ident	5.6	54.826	20.984	2	2	2
Cellular Component	GO:0043232	7	intracellular non-membrane-bounded organelle	5.1742e-15	A9P9G9	60S ribosomal protein L28	POPTR_0001s19490g	ident	42.5	16.388	38.518	7	4	3
Cellular Component	GO:0043232	7	intracellular non-membrane-bounded organelle	5.1742e-15	A9P9A0	40S ribosomal protein S16	POPTR_0008s14940g	ident	57.6	16.402	60.008	17	9	2
Cellular Component	GO:0043232	7	intracellular non-membrane-bounded organelle	5.1742e-15	B9MU53	Cell cycle checkpoint protein RAD1 OS=Mus musculus GN=Rad1 PE=1 SV=1	POPTR_0001s02150g	ident	3.6	33.965	6.5261	1	1	1
Cellular Component	GO:0043232	7	intracellular non-membrane-bounded organelle	5.1742e-15	A0A2K2BIM1	60S ribosomal protein L37a OS=Gossypium hirsutum GN=RPL37A PE=3 SV=1	POPTR_002G140100v3	ident	25	7.1202	7.2194	1	1	1
Cellular Component	GO:0043232	7	intracellular non-membrane-bounded organelle	5.1742e-15	A9P8N4	Profilin	POPTR_0006s25180g	ident	24.4	13.972	20.452	4	2	2
Cellular Component	GO:0043232	7	intracellular non-membrane-bounded organelle	5.1742e-15	A9PC05	40S ribosomal protein S24	POPTR_0010s09820g	ident	26.9	15.332	14.763	3	4	1
Cellular Component	GO:0043232	7	intracellular non-membrane-bounded organelle	5.1742e-15	B9IBY8	40S ribosomal protein S13-2	POPTR_0014s06420g	ident	31.8	17.107	5.8011	1	4	1
Cellular Component	GO:0043232	7	intracellular non-membrane-bounded organelle	5.1742e-15	A4GYU7	50S ribosomal protein L14, chloroplastic	rpl14	ident	19.7	13.579	20.62	4	2	2
Cellular Component	GO:0043232	7	intracellular non-membrane-bounded organelle	5.1742e-15	A0A2K2A680	50S ribosomal protein L4, chloroplastic OS=Arabidopsis thaliana GN=RPL4 PE=2 SV=2	POPTR_006G221100v3	ident	3.6	30.94	5.6278	1	1	1
Cellular Component	GO:0043232	7	intracellular non-membrane-bounded organelle	5.1742e-15	A9PB01	30S ribosomal protein S9	POPTR_0014s03900g	ident	13.8	22.829	22.769	4	2	1
Cellular Component	GO:0043232	7	intracellular non-membrane-bounded organelle	5.1742e-15	A9PFG8	Actin-depolymerizing factor family protein	POPTR_0010s21560g	ident	8.6	16.047	9.1382	1	1	1
Cellular Component	GO:0043232	7	intracellular non-membrane-bounded organelle	5.1742e-15	B9HJD9	High-mobility-group family protein	POPTR_0008s13170g	ident	4.8	21.583	6.7983	1	1	1
Cellular Component	GO:0043232	7	intracellular non-membrane-bounded organelle	5.1742e-15	A0A2K1XLI8	40S ribosomal protein SA	POPTR_015G112900v3	ident	41.3	31.698	171.53	19	10	3
Cellular Component	GO:0043232	7	intracellular non-membrane-bounded organelle	5.1742e-15	A9PBF7	60S ribosomal protein L18a	POPTR_0011s06730g	ident	27.5	21.331	43.621	6	6	6
Cellular Component	GO:0043232	7	intracellular non-membrane-bounded organelle	5.1742e-15	A9PCZ0	40S ribosomal protein S15 OS=Oryza sativa subsp. japonica GN=RPS15 PE=2 SV=2	POPTR_0002s04420g	ident	24.3	17.225	19.895	2	2	2
Cellular Component	GO:0043232	7	intracellular non-membrane-bounded organelle	5.1742e-15	A0A2K2B2X9	40S ribosomal protein SA	POPTR_003G071200v3	ident	29.6	31.981	111.82	10	8	3
Cellular Component	GO:0043232	7	intracellular non-membrane-bounded organelle	5.1742e-15	A9P7T6	Tubulin alpha chain	POPTR_0001s04180g	ident	24.2	49.819	6.4145	1	8	1
Cellular Component	GO:0043232	7	intracellular non-membrane-bounded organelle	5.1742e-15	A0A2K2BKH7	60S acidic ribosomal protein P1 OS=Zea mays GN=RPP1A PE=1 SV=1	POPTR_002G179400v3	ident	34.6	11.218	62.9	2	1	1
Cellular Component	GO:0043232	7	intracellular non-membrane-bounded organelle	5.1742e-15	U5GAZ4	40S ribosomal protein S3a	POPTR_0005s05280g	ident	6.9	29.705	16.023	2	2	2
Cellular Component	GO:0043232	7	intracellular non-membrane-bounded organelle	5.1742e-15	A9PE87	Tubulin beta chain	POPTR_0001s25410g	ident	16.5	50.41	7.6361	2	7	0
Cellular Component	GO:0043232	7	intracellular non-membrane-bounded organelle	5.1742e-15	A9PA83	Histone H4	POPTR_0005s11740g	ident	33	11.409	37.629	10	5	3
Cellular Component	GO:0043232	7	intracellular non-membrane-bounded organelle	5.1742e-15	B9I3F7	50S ribosomal protein L19, chloroplastic OS=Spinacia oleracea GN=RPL19 PE=1 SV=2	POPTR_0012s08870g	ident	3.3	27.425	-2	1	1	1
Cellular Component	GO:0043232	7	intracellular non-membrane-bounded organelle	5.1742e-15	A0A2K1XKK7	60S ribosomal protein L17-1 OS=Arabidopsis thaliana GN=RPL17A PE=2 SV=1	POPTR_015G094400v3	ident	24.5	16.057	14.047	2	3	1
Cellular Component	GO:0043232	7	intracellular non-membrane-bounded organelle	5.1742e-15	A0A2K2BUM7	30S ribosomal protein S6 alpha, chloroplastic OS=Arabidopsis thaliana GN=RPS6 PE=2 SV=1	POPTR_001G088300v3	ident	9.4	23.174	12.446	4	2	2
Cellular Component	GO:0043232	7	intracellular non-membrane-bounded organelle	5.1742e-15	A9PHY3	Ribosome-binding factor PSRP1, chloroplastic OS=Spinacia oleracea GN=PSRP1 PE=1 SV=2	POPTR_0015s00430g	ident	3.3	34.338	6.7848	2	1	1
Cellular Component	GO:0043232	7	intracellular non-membrane-bounded organelle	5.1742e-15	A9P9U4	60S ribosomal protein L22-1	POPTR_0002s20540g	ident	38.4	14.037	9.6252	1	5	1
Cellular Component	GO:0043232	7	intracellular non-membrane-bounded organelle	5.1742e-15	A0A2K1X4Y3	Tubulin alpha chain	POPTR_017G081000v3	ident	37	49.681	273.63	21	13	1
Cellular Component	GO:0043232	7	intracellular non-membrane-bounded organelle	5.1742e-15	A0A2K2C2L9	Actin-depolymerizing factor 2 OS=Petunia hybrida GN=ADF2 PE=2 SV=1	POPTR_001G236400v3	ident	9.1	15.342	15.073	3	1	1
Cellular Component	GO:0043232	7	intracellular non-membrane-bounded organelle	5.1742e-15	A0A2K2AKR5	Structural maintenance of chromosomes protein	POPTR_005G224900v3	ident	2	140.64	11.917	2	2	2
Cellular Component	GO:0043232	7	intracellular non-membrane-bounded organelle	5.1742e-15	A9PB37	60S ribosomal protein L13a-2	POPTR_0001s32170g	ident	28.6	23.62	47.123	13	7	4
Cellular Component	GO:0043232	7	intracellular non-membrane-bounded organelle	5.1742e-15	B9HAL7	39S ribosomal protein L41-A, mitochondrial OS=Xenopus laevis GN=mrpl41-a PE=2 SV=1	POPTR_0006s07000g	ident	14.1	10.287	5.636	1	1	1
Cellular Component	GO:0043232	7	intracellular non-membrane-bounded organelle	5.1742e-15	B9GWG9	Tubulin beta chain	POPTR_0003s12540g	ident	16.6	50.091	15.134	1	7	0
Cellular Component	GO:0043232	7	intracellular non-membrane-bounded organelle	5.1742e-15	A9PCN3	GA family protein	POPTR_0011s15080g	ident	32.1	21.917	7.6534	1	8	1
Cellular Component	GO:0043232	7	intracellular non-membrane-bounded organelle	5.1742e-15	A9P9L2	60S ribosomal protein L35a	POPTR_0010s20140g	ident	33.9	12.811	7.5472	1	3	1
Cellular Component	GO:0043232	7	intracellular non-membrane-bounded organelle	5.1742e-15	A4GYU4	30S ribosomal protein S11, chloroplastic	rps11	ident	10.9	14.954	9.1746	2	1	1
Cellular Component	GO:0043232	7	intracellular non-membrane-bounded organelle	5.1742e-15	B9HKS8	50S ribosomal protein L28, chloroplastic OS=Arabidopsis thaliana GN=RPL28 PE=2 SV=2	POPTR_0008s16970g	ident	8.7	11.807	6.2839	1	1	1
Cellular Component	GO:0043232	7	intracellular non-membrane-bounded organelle	5.1742e-15	U5G4E1	40S ribosomal protein S9-2 OS=Arabidopsis thaliana GN=RPS9C PE=1 SV=1	POPTR_0007s09750g	ident	35	22.962	18.04	2	9	1
Cellular Component	GO:0043232	7	intracellular non-membrane-bounded organelle	5.1742e-15	U5FZ59	Cell differentiation protein RCD1 homolog OS=Pongo abelii GN=RQCD1 PE=2 SV=2	POPTR_0011s08710g	ident	7	14.393	6.1031	1	1	1
Cellular Component	GO:0043232	7	intracellular non-membrane-bounded organelle	5.1742e-15	A9PD23	40S ribosomal protein S20	POPTR_0015s14510g	ident	42.3	13.682	40.39	9	6	6
Cellular Component	GO:0043232	7	intracellular non-membrane-bounded organelle	5.1742e-15	A4GYQ8	30S ribosomal protein S14, chloroplastic	rps14	ident	21	11.683	13.496	2	2	2
Cellular Component	GO:0043232	7	intracellular non-membrane-bounded organelle	5.1742e-15	B9IIC4	60S ribosomal protein L21-2 OS=Arabidopsis thaliana GN=RPL21E PE=2 SV=1	POPTR_0016s06110g	ident	25.6	18.753	25.649	2	2	1
Cellular Component	GO:0043232	7	intracellular non-membrane-bounded organelle	5.1742e-15	B9GJJ8	60S ribosomal protein L9 OS=Oryza sativa subsp. japonica GN=RPL9 PE=2 SV=3	POPTR_0001s45820g	ident	30.1	21.934	195.23	12	8	1
Cellular Component	GO:0043232	7	intracellular non-membrane-bounded organelle	5.1742e-15	U5FRN5	40S ribosomal protein S5-2 OS=Arabidopsis thaliana GN=RPS5B PE=1 SV=2	POPTR_0013s05290g	ident	11.7	16.179	11.277	2	2	2
Cellular Component	GO:0043232	7	intracellular non-membrane-bounded organelle	5.1742e-15	U5GX63	Ribosome maturation factor RimM OS=Synechococcus sp. (strain WH7803) GN=rimM PE=3 SV=1	POPTR_0001s34380g	ident	2.1	75.409	5.7615	1	1	1
Cellular Component	GO:0043232	7	intracellular non-membrane-bounded organelle	5.1742e-15	U5GXN9	Ribosomal protein S14 mitochondrial (Fragment)	POPTR_0001s44850g	ident	7.4	18.877	7.4455	1	1	1
Cellular Component	GO:0043232	7	intracellular non-membrane-bounded organelle	5.1742e-15	A0A2K2C7C7	50S ribosomal protein L27, chloroplastic OS=Arabidopsis thaliana GN=RPL27 PE=2 SV=1	POPTR_001G329500v3	ident	20	14.868	20.577	3	3	3
Cellular Component	GO:0043232	7	intracellular non-membrane-bounded organelle	5.1742e-15	B9GT02	40S ribosomal protein S12	POPTR_0002s05710g	ident	44.1	15.325	45.978	6	5	3
Cellular Component	GO:0043232	7	intracellular non-membrane-bounded organelle	5.1742e-15	A0A2K1Z561	40S ribosomal protein S29 OS=Triticum aestivum GN=RPS29 PE=1 SV=1	POPTR_009G090000v3	ident	37.5	6.4304	13.574	3	2	2
Cellular Component	GO:0043232	7	intracellular non-membrane-bounded organelle	5.1742e-15	B9H9F7	Dyskerin family protein	POPTR_0006s04270g	ident	2.5	66.57	7.4866	1	1	1
Cellular Component	GO:0043232	7	intracellular non-membrane-bounded organelle	5.1742e-15	A0A2K2BAT9	Tubulin alpha chain	POPTR_003G220300v3	ident	28.3	46.197	12.876	2	9	0
Cellular Component	GO:0043232	7	intracellular non-membrane-bounded organelle	5.1742e-15	A9P806	Ribosomal protein 1	POPTR_0005s21640g	ident	24.9	44.38	93.754	14	11	2
Cellular Component	GO:0043232	7	intracellular non-membrane-bounded organelle	5.1742e-15	B9I857	Probable nucleolar protein 5-2 OS=Arabidopsis thaliana GN=NOP5-2 PE=1 SV=1	POPTR_0013s03260g	ident	1.8	61.735	9.8639	1	1	1
Cellular Component	GO:0043232	7	intracellular non-membrane-bounded organelle	5.1742e-15	U5G798	60S ribosomal protein L4-1 OS=Arabidopsis thaliana GN=RPL4A PE=1 SV=1	POPTR_0006s13470g	ident	26.7	41.553	20.248	3	10	3
Cellular Component	GO:0043232	7	intracellular non-membrane-bounded organelle	5.1742e-15	A0A2K2A437	60S ribosomal protein L11 OS=Medicago sativa GN=RPL11 PE=2 SV=1	POPTR_006G181500v3	ident	31.2	19.572	39.856	8	5	5
[truncated: 38,051 more rows]
